# Supplementary material for: ISC, a Novel Group of Bacterial and Archaeal DNA Transposons That Encode Cas9 Homologs
Source: PubMed Central journal article supplement — J Bacteriol. 2016 Feb 12;198(5):797–807. doi: 10.1128/JB.00783-15 (PMC4810608; doi:10.1128/jb.00783-15), 2016-02-12
Supplement: JB.00783-15_zjb999093943so1.pdf [file JB.00783-15_zjb999093943so1.pdf]

Supplementary Table 1

| GI number | Protein Length | BLASTCLUS T cluster number | Transposons analyzed in this work | Phylum         | Organism                                | Count per organism | Taxonomy                                                                                                                                           |
|-----------|----------------|----------------------------|-----------------------------------|----------------|-----------------------------------------|--------------------|----------------------------------------------------------------------------------------------------------------------------------------------------|
| 196183795 | 398            | 24                         | ISC1-1_CC                         | Cyanobacteria  | Coleofasciculus chthonoplastes PCC 7420 | 25                 | Bacteria,Cyanobacteria,Oscillatoriophyceae,Oscillatoriales,Coleofasciculus,Coleofasciculus chthonoplastes                                          |
| 297547772 | 366            | 62                         | ISC1-1_KR                         | Chloroflexi    | Ktedonobacter racemifer DSM 44963       | 15                 | Bacteria,Chloroflexi,Ktedonobacteria,Ktedonobacterales,Ktedonobacteraceae,Ktedonobacter,Ktedonobacter racemifer,Ktedonobacter racemifer DSM 44963  |
| 166086237 | 380            | 4                          | ISC1-1_MA                         | Cyanobacteria  | Microcystis aeruginosa NIES-843         | 2                  | Bacteria,Cyanobacteria,Oscillatoriophyceae,Chroococcales,Microcystis,Microcystis aeruginosa,Microcystis aeruginosa NIES-843                        |
| 432001730 | 426            | 12                         | ISC2-1_AF                         | Firmicutes     | Anoxybacillus flavithermus TNO-09.006   | 6                  | Bacteria,Firmicutes,Bacilli,Bacillales,Bacillaceae,Anoxybacillus,Anoxybacillus flavithermus                                                        |
| 769148683 | 470            | 72                         | ISC2-1_AH                         | Firmicutes     | Anaerostipes hadrus                     | 6                  | Bacteria,Firmicutes,Clostridia,Clostridiales,Lachnospiraceae,Anaerostipes,Anaerostipes hadrus                                                      |
| 516257699 | 427            | 21                         | ISC2-1_GS                         | Cyanobacteria  | Geitlerinema sp. PCC 7105               | 18                 | Bacteria,Cyanobacteria,Oscillatoriophyceae,Oscillatoriales,Geitlerinema,Geitlerinema sp. PCC 7105                                                  |
| 433669275 | 419            | 126                        | ISC2-1_HH                         | Firmicutes     | Halobacteroides halobius DSM 5150       | 3                  | Bacteria,Firmicutes,Clostridia,Halanaerobiales,Halobacteroidaceae,Halobacteroides,Halobacteroides halobius                                         |
| 297550215 | 429            | 8                          | ISC2-1_KR                         | Chloroflexi    | Ktedonobacter racemifer                 | 52                 | Bacteria,Chloroflexi,Ktedonobacteria,Ktedonobacterales,Ktedonobacteraceae,Ktedonobacter,Ktedonobacter racemifer                                    |
| 805378795 | 438            | 3                          | ISC2-1_ML                         | Euryarchaeota  | Methanosarcina lacustris Z-7289         | 17                 | Archaea,Euryarchaeota,Methanomicrobia,Methanosarcinales,Methanosarcinaceae,Methanosarcina,Methanosarcina lacustris,Methanosarcina lacustris Z-7289 |
| 126627116 | 447            | 11                         | ISC2-1_MS                         | Proteobacteria | Marinobacter sp. ELB17                  | 9                  | Bacteria,Proteobacteria,Gammaproteobacteria,Alteromonadales,Alteromonadaceae,Marinobacter,Marinobacter sp. ELB17                                   |
| 291580488 | 427            | 54                         | ISC2-1_NH                         | Proteobacteria | Nitrosococcus halophilus Nc 4           | 7                  | Bacteria,Proteobacteria,Gammaproteobacteria,Chromatiales,Chromatiaceae,Nitrosococcus,Nitrosococcus halophilus                                      |
| 528102090 | 429            | 19                         | ISC2-1_SM                         | Proteobacteria | Salipiger mucosus DSM 16094             | 4                  | Bacteria,Proteobacteria,Alphaproteobacteria,Rhodobacterales,Rhodobacteraceae,Salipiger,Salipiger mucosus                                           |
| 564132996 | 416            | 13                         | ISC2-1_YF                         | Firmicutes     | Youngiibacter fragilis 232.1            | 7                  | Bacteria,Firmicutes,Clostridia,Clostridiales,Clostridiaceae,Youngiibacter,Youngiibacter fragilis,Youngiibacter fragilis 232.1                      |
| 658102102 | 450            | 48                         | ISC2Y-1_CH                        | Firmicutes     | Clostridium haemolyticum NCTC 9693      | 1                  | Bacteria,Firmicutes,Clostridia,Clostridiales,Clostridiaceae,Clostridium,Clostridium haemolyticum                                                   |
| 851246344 | 429            | 1                          |                                   | Euryarchaeota  | Methanosarcina                          | 2                  | Archaea,Euryarchaeota,Methanomicrobia,Methanosarcinales,Methanosarcinaceae,Methanosarcina                                                          |
| 851247265 | 374            | 1                          |                                   | Euryarchaeota  | Methanosarcina lacustris                | 60                 | Archaea,Euryarchaeota,Methanomicrobia,Methanosarcinales,Methanosarcinaceae,Methanosarcina,Methanosarcina lacustris                                 |



|           |     |   |               |                                 |                                                                                                                                                      |
|-----------|-----|---|---------------|---------------------------------|------------------------------------------------------------------------------------------------------------------------------------------------------|
| 851243919 | 427 | 1 | Euryarchaeota | Methanosarcina lacustris        | Archaea,Euryarchaeota,Methanomicrobia, Methanosarcinales,Methanosarcinaceae, 60 Methanosarcina,Methanosarcina lacustris                              |
| 851239942 | 427 | 1 | Euryarchaeota | Methanosarcina lacustris        | Archaea,Euryarchaeota,Methanomicrobia, Methanosarcinales,Methanosarcinaceae, 60 Methanosarcina,Methanosarcina lacustris                              |
| 851241713 | 427 | 1 | Euryarchaeota | Methanosarcina lacustris        | Archaea,Euryarchaeota,Methanomicrobia, Methanosarcinales,Methanosarcinaceae, 60 Methanosarcina,Methanosarcina lacustris                              |
| 851242838 | 427 | 1 | Euryarchaeota | Methanosarcina lacustris        | Archaea,Euryarchaeota,Methanomicrobia, Methanosarcinales,Methanosarcinaceae, 60 Methanosarcina,Methanosarcina lacustris                              |
| 851239344 | 427 | 1 | Euryarchaeota | Methanosarcina lacustris        | Archaea,Euryarchaeota,Methanomicrobia, Methanosarcinales,Methanosarcinaceae, 60 Methanosarcina,Methanosarcina lacustris                              |
| 851242567 | 427 | 1 | Euryarchaeota | Methanosarcina lacustris        | Archaea,Euryarchaeota,Methanomicrobia, Methanosarcinales,Methanosarcinaceae, 60 Methanosarcina,Methanosarcina lacustris                              |
| 851241676 | 427 | 1 | Euryarchaeota | Methanosarcina lacustris        | Archaea,Euryarchaeota,Methanomicrobia, Methanosarcinales,Methanosarcinaceae, 60 Methanosarcina,Methanosarcina lacustris                              |
| 851245052 | 427 | 1 | Euryarchaeota | Methanosarcina lacustris        | Archaea,Euryarchaeota,Methanomicrobia, Methanosarcinales,Methanosarcinaceae, 60 Methanosarcina,Methanosarcina lacustris                              |
| 851241227 | 427 | 1 | Euryarchaeota | Methanosarcina lacustris        | Archaea,Euryarchaeota,Methanomicrobia, Methanosarcinales,Methanosarcinaceae, 60 Methanosarcina,Methanosarcina lacustris                              |
| 851244192 | 429 | 1 | Euryarchaeota | Methanosarcina lacustris        | Archaea,Euryarchaeota,Methanomicrobia, Methanosarcinales,Methanosarcinaceae, 60 Methanosarcina,Methanosarcina lacustris                              |
| 851243768 | 430 | 1 | Euryarchaeota | Methanosarcina lacustris        | Archaea,Euryarchaeota,Methanomicrobia, Methanosarcinales,Methanosarcinaceae, 60 Methanosarcina,Methanosarcina lacustris                              |
| 919167324 | 433 | 1 | Euryarchaeota | Methanosarcina lacustris        | Archaea,Euryarchaeota,Methanomicrobia, Methanosarcinales,Methanosarcinaceae, 60 Methanosarcina,Methanosarcina lacustris                              |
| 851238328 | 448 | 1 | Euryarchaeota | Methanosarcina lacustris        | Archaea,Euryarchaeota,Methanomicrobia, Methanosarcinales,Methanosarcinaceae, 60 Methanosarcina,Methanosarcina lacustris                              |
| 805378796 | 457 | 1 | Euryarchaeota | Methanosarcina lacustris Z-7289 | Archaea,Euryarchaeota,Methanomicrobia, Methanosarcinales,Methanosarcinaceae, Methanosarcina,Methanosarcina lacustris,Methanosarcina lacustris Z-7289 |
| 851298689 | 426 | 1 | Euryarchaeota | Methanosarcina sp. 1.H.A.2.2    | Archaea,Euryarchaeota,Methanomicrobia, Methanosarcinales,Methanosarcinaceae, Methanosarcina,Methanosarcina sp. 3 1.H.A.2.2                           |

|           |     |   |               |                                   |                                                                                                                                       |
|-----------|-----|---|---------------|-----------------------------------|---------------------------------------------------------------------------------------------------------------------------------------|
| 851257057 | 426 | 1 | Euryarchaeota | Methanosarcina sp.<br>1.H.T.1A.1  | Archaea,Euryarchaeota,Methanomicrobia,<br>Methanosarcinales,Methanosarcinaceae,<br>Methanosarcina,Methanosarcina sp.<br>1 1.H.T.1A.1  |
| 851275145 | 426 | 1 | Euryarchaeota | Methanosarcina sp.<br>2.H.T.1A.15 | Archaea,Euryarchaeota,Methanomicrobia,<br>Methanosarcinales,Methanosarcinaceae,<br>Methanosarcina,Methanosarcina sp.<br>1 2.H.T.1A.15 |
| 851296580 | 426 | 1 | Euryarchaeota | Methanosarcina sp.<br>2.H.T.1A.6  | Archaea,Euryarchaeota,Methanomicrobia,<br>Methanosarcinales,Methanosarcinaceae,<br>Methanosarcina,Methanosarcina sp.<br>1 2.H.T.1A.6  |
| 851310953 | 421 | 1 | Euryarchaeota | Methanosarcina sp.<br>2.H.T.1A.8  | Archaea,Euryarchaeota,Methanomicrobia,<br>Methanosarcinales,Methanosarcinaceae,<br>Methanosarcina,Methanosarcina sp.<br>1 2.H.T.1A.8  |
| 805341356 | 414 | 1 | Euryarchaeota | Methanosarcina sp.<br>WH1         | Archaea,Euryarchaeota,Methanomicrobia,<br>Methanosarcinales,Methanosarcinaceae,<br>3 Methanosarcina,Methanosarcina sp. WH1            |
| 851245944 | 427 | 1 | Euryarchaeota | Methanosarcina sp.<br>WH1         | Archaea,Euryarchaeota,Methanomicrobia,<br>Methanosarcinales,Methanosarcinaceae,<br>3 Methanosarcina,Methanosarcina sp. WH1            |
| 851242202 | 429 | 1 | Euryarchaeota | Methanosarcina sp.<br>WH1         | Archaea,Euryarchaeota,Methanomicrobia,<br>Methanosarcinales,Methanosarcinaceae,<br>3 Methanosarcina,Methanosarcina sp. WH1            |
| 851295935 | 427 | 1 | Euryarchaeota | Methanosarcina sp.<br>WWM596      | Archaea,Euryarchaeota,Methanomicrobia,<br>Methanosarcinales,Methanosarcinaceae,<br>Methanosarcina,Methanosarcina sp.<br>5 WWM596      |
| 493671516 | 423 | 2 | Cyanobacteria | Arthrospira                       | Bacteria,Cyanobacteria,Oscillatoriophycid<br>7 eae,Oscillatoriales,Arthrospira                                                        |
| 915401517 | 409 | 2 | Cyanobacteria | Arthrospira maxima                | Bacteria,Cyanobacteria,Oscillatoriophycid<br>eae,Oscillatoriales,Arthrospira,Arthrospira<br>8 maxima                                  |
| 493721134 | 423 | 2 | Cyanobacteria | Arthrospira maxima                | Bacteria,Cyanobacteria,Oscillatoriophycid<br>eae,Oscillatoriales,Arthrospira,Arthrospira<br>8 maxima                                  |
| 493719933 | 423 | 2 | Cyanobacteria | Arthrospira maxima                | Bacteria,Cyanobacteria,Oscillatoriophycid<br>eae,Oscillatoriales,Arthrospira,Arthrospira<br>8 maxima                                  |
| 493719194 | 423 | 2 | Cyanobacteria | Arthrospira maxima                | Bacteria,Cyanobacteria,Oscillatoriophycid<br>eae,Oscillatoriales,Arthrospira,Arthrospira<br>8 maxima                                  |
| 493718356 | 423 | 2 | Cyanobacteria | Arthrospira maxima                | Bacteria,Cyanobacteria,Oscillatoriophycid<br>eae,Oscillatoriales,Arthrospira,Arthrospira<br>8 maxima                                  |
| 493721283 | 423 | 2 | Cyanobacteria | Arthrospira maxima                | Bacteria,Cyanobacteria,Oscillatoriophycid<br>eae,Oscillatoriales,Arthrospira,Arthrospira<br>8 maxima                                  |
| 493721103 | 423 | 2 | Cyanobacteria | Arthrospira maxima                | Bacteria,Cyanobacteria,Oscillatoriophycid<br>eae,Oscillatoriales,Arthrospira,Arthrospira<br>8 maxima                                  |
| 493720167 | 423 | 2 | Cyanobacteria | Arthrospira maxima                | Bacteria,Cyanobacteria,Oscillatoriophycid<br>eae,Oscillatoriales,Arthrospira,Arthrospira<br>8 maxima                                  |
| 209494659 | 402 | 2 | Cyanobacteria | Arthrospira maxima CS-<br>328     | Bacteria,Cyanobacteria,Oscillatoriophycid<br>eae,Oscillatoriales,Arthrospira,Arthrospira<br>5 maxima,Arthrospira maxima CS-328        |

|           |     |   |               |                          |    |                                                                                                     |
|-----------|-----|---|---------------|--------------------------|----|-----------------------------------------------------------------------------------------------------|
| 493671654 | 423 | 2 | Cyanobacteria | Arthrospira platensis    | 20 | Bacteria,Cyanobacteria,Oscillatorioophycid eae,Oscillatoriales,Arthrospira,Arthrospira platensis    |
| 493675308 | 423 | 2 | Cyanobacteria | Arthrospira platensis    | 20 | Bacteria,Cyanobacteria,Oscillatorioophycid eae,Oscillatoriales,Arthrospira,Arthrospira platensis    |
| 493674113 | 423 | 2 | Cyanobacteria | Arthrospira platensis    | 20 | Bacteria,Cyanobacteria,Oscillatorioophycid eae,Oscillatoriales,Arthrospira,Arthrospira platensis    |
| 493672300 | 423 | 2 | Cyanobacteria | Arthrospira platensis    | 20 | Bacteria,Cyanobacteria,Oscillatorioophycid eae,Oscillatoriales,Arthrospira,Arthrospira platensis    |
| 493671246 | 423 | 2 | Cyanobacteria | Arthrospira platensis    | 20 | Bacteria,Cyanobacteria,Oscillatorioophycid eae,Oscillatoriales,Arthrospira,Arthrospira platensis    |
| 504042804 | 423 | 2 | Cyanobacteria | Arthrospira platensis    | 20 | Bacteria,Cyanobacteria,Oscillatorioophycid eae,Oscillatoriales,Arthrospira,Arthrospira platensis    |
| 493672164 | 423 | 2 | Cyanobacteria | Arthrospira platensis    | 20 | Bacteria,Cyanobacteria,Oscillatorioophycid eae,Oscillatoriales,Arthrospira,Arthrospira platensis    |
| 504040676 | 423 | 2 | Cyanobacteria | Arthrospira platensis    | 20 | Bacteria,Cyanobacteria,Oscillatorioophycid eae,Oscillatoriales,Arthrospira,Arthrospira platensis    |
| 375328713 | 402 | 2 | Cyanobacteria | Arthrospira sp. PCC 8005 | 13 | Bacteria,Cyanobacteria,Oscillatorioophycid eae,Oscillatoriales,Arthrospira,Arthrospira sp. PCC 8005 |
| 375324714 | 402 | 2 | Cyanobacteria | Arthrospira sp. PCC 8005 | 13 | Bacteria,Cyanobacteria,Oscillatorioophycid eae,Oscillatoriales,Arthrospira,Arthrospira sp. PCC 8005 |
| 890649894 | 423 | 2 | Cyanobacteria | Arthrospira sp. PCC 8005 | 13 | Bacteria,Cyanobacteria,Oscillatorioophycid eae,Oscillatoriales,Arthrospira,Arthrospira sp. PCC 8005 |
| 495332043 | 423 | 2 | Cyanobacteria | Arthrospira sp. PCC 8005 | 13 | Bacteria,Cyanobacteria,Oscillatorioophycid eae,Oscillatoriales,Arthrospira,Arthrospira sp. PCC 8005 |
| 890650142 | 423 | 2 | Cyanobacteria | Arthrospira sp. PCC 8005 | 13 | Bacteria,Cyanobacteria,Oscillatorioophycid eae,Oscillatoriales,Arthrospira,Arthrospira sp. PCC 8005 |
| 495327223 | 423 | 2 | Cyanobacteria | Arthrospira sp. PCC 8005 | 13 | Bacteria,Cyanobacteria,Oscillatorioophycid eae,Oscillatoriales,Arthrospira,Arthrospira sp. PCC 8005 |
| 495331526 | 423 | 2 | Cyanobacteria | Arthrospira sp. PCC 8005 | 13 | Bacteria,Cyanobacteria,Oscillatorioophycid eae,Oscillatoriales,Arthrospira,Arthrospira sp. PCC 8005 |
| 495332312 | 423 | 2 | Cyanobacteria | Arthrospira sp. PCC 8005 | 13 | Bacteria,Cyanobacteria,Oscillatorioophycid eae,Oscillatoriales,Arthrospira,Arthrospira sp. PCC 8005 |
| 495326132 | 423 | 2 | Cyanobacteria | Arthrospira sp. PCC 8005 | 13 | Bacteria,Cyanobacteria,Oscillatorioophycid eae,Oscillatoriales,Arthrospira,Arthrospira sp. PCC 8005 |
| 809069684 | 423 | 2 | Cyanobacteria | Arthrospira sp. TJSD091  | 7  | Bacteria,Cyanobacteria,Oscillatorioophycid eae,Oscillatoriales,Arthrospira,Arthrospira sp. TJSD091  |
| 809068281 | 423 | 2 | Cyanobacteria | Arthrospira sp. TJSD091  | 7  | Bacteria,Cyanobacteria,Oscillatorioophycid eae,Oscillatoriales,Arthrospira,Arthrospira sp. TJSD091  |
| 809073352 | 423 | 2 | Cyanobacteria | Arthrospira sp. TJSD091  | 7  | Bacteria,Cyanobacteria,Oscillatorioophycid eae,Oscillatoriales,Arthrospira,Arthrospira sp. TJSD091  |



|           |     |   |               |                                 |    |                                                                                                                                                      |
|-----------|-----|---|---------------|---------------------------------|----|------------------------------------------------------------------------------------------------------------------------------------------------------|
| 805378537 | 438 | 3 | Euryarchaeota | Methanosarcina lacustris Z-7289 | 17 | Archaea,Euryarchaeota,Methanomicrobia, Methanosarcinales,Methanosarcinaceae, Methanosarcina,Methanosarcina lacustris,Methanosarcina lacustris Z-7289 |
| 805377617 | 438 | 3 | Euryarchaeota | Methanosarcina lacustris Z-7289 | 17 | Archaea,Euryarchaeota,Methanomicrobia, Methanosarcinales,Methanosarcinaceae, Methanosarcina,Methanosarcina lacustris,Methanosarcina lacustris Z-7289 |
| 805379346 | 438 | 3 | Euryarchaeota | Methanosarcina lacustris Z-7289 | 17 | Archaea,Euryarchaeota,Methanomicrobia, Methanosarcinales,Methanosarcinaceae, Methanosarcina,Methanosarcina lacustris,Methanosarcina lacustris Z-7289 |
| 805378765 | 438 | 3 | Euryarchaeota | Methanosarcina lacustris Z-7289 | 17 | Archaea,Euryarchaeota,Methanomicrobia, Methanosarcinales,Methanosarcinaceae, Methanosarcina,Methanosarcina lacustris,Methanosarcina lacustris Z-7289 |
| 805377559 | 438 | 3 | Euryarchaeota | Methanosarcina lacustris Z-7289 | 17 | Archaea,Euryarchaeota,Methanomicrobia, Methanosarcinales,Methanosarcinaceae, Methanosarcina,Methanosarcina lacustris,Methanosarcina lacustris Z-7289 |
| 814871849 | 438 | 3 | Euryarchaeota | Methanosarcina sp. 1.H.A.2.2    | 3  | Archaea,Euryarchaeota,Methanomicrobia, Methanosarcinales,Methanosarcinaceae, Methanosarcina,Methanosarcina sp. 1.H.A.2.2                             |
| 851298865 | 439 | 3 | Euryarchaeota | Methanosarcina sp. 1.H.A.2.2    | 3  | Archaea,Euryarchaeota,Methanomicrobia, Methanosarcinales,Methanosarcinaceae, Methanosarcina,Methanosarcina sp. 1.H.A.2.2                             |
| 814724486 | 438 | 3 | Euryarchaeota | Methanosarcina sp. 2.H.A.1B.4   | 4  | Archaea,Euryarchaeota,Methanomicrobia, Methanosarcinales,Methanosarcinaceae, Methanosarcina,Methanosarcina sp. 2.H.A.1B.4                            |
| 851309945 | 439 | 3 | Euryarchaeota | Methanosarcina sp. 2.H.A.1B.4   | 4  | Archaea,Euryarchaeota,Methanomicrobia, Methanosarcinales,Methanosarcinaceae, Methanosarcina,Methanosarcina sp. 2.H.A.1B.4                            |
| 779874673 | 365 | 4 | Cyanobacteria | Microcystis aeruginosa          | 35 | Bacteria,Cyanobacteria,Oscillatoriophyceae,Chroococcales,Microcystis,Microcystis aeruginosa                                                          |
| 754188235 | 365 | 4 | Cyanobacteria | Microcystis aeruginosa          | 35 | Bacteria,Cyanobacteria,Oscillatoriophyceae,Chroococcales,Microcystis,Microcystis aeruginosa                                                          |
| 488888475 | 365 | 4 | Cyanobacteria | Microcystis aeruginosa          | 35 | Bacteria,Cyanobacteria,Oscillatoriophyceae,Chroococcales,Microcystis,Microcystis aeruginosa                                                          |
| 501224371 | 365 | 4 | Cyanobacteria | Microcystis aeruginosa          | 35 | Bacteria,Cyanobacteria,Oscillatoriophyceae,Chroococcales,Microcystis,Microcystis aeruginosa                                                          |
| 779880012 | 365 | 4 | Cyanobacteria | Microcystis aeruginosa          | 35 | Bacteria,Cyanobacteria,Oscillatoriophyceae,Chroococcales,Microcystis,Microcystis aeruginosa                                                          |
| 488856157 | 365 | 4 | Cyanobacteria | Microcystis aeruginosa          | 35 | Bacteria,Cyanobacteria,Oscillatoriophyceae,Chroococcales,Microcystis,Microcystis aeruginosa                                                          |
| 490387313 | 365 | 4 | Cyanobacteria | Microcystis aeruginosa          | 35 | Bacteria,Cyanobacteria,Oscillatoriophyceae,Chroococcales,Microcystis,Microcystis aeruginosa                                                          |

|           |     |   |               |                                       |                                                                                                                                 |
|-----------|-----|---|---------------|---------------------------------------|---------------------------------------------------------------------------------------------------------------------------------|
| 488844531 | 365 | 4 | Cyanobacteria | Microcystis aeruginosa                | 35 aeruginosa<br>Bacteria,Cyanobacteria,Oscillatorioophycid eae,Chroococcales,Microcystis,Microcystis                           |
| 817700858 | 365 | 4 | Cyanobacteria | Microcystis aeruginosa                | 35 aeruginosa<br>Bacteria,Cyanobacteria,Oscillatorioophycid eae,Chroococcales,Microcystis,Microcystis                           |
| 488848557 | 365 | 4 | Cyanobacteria | Microcystis aeruginosa                | 35 aeruginosa<br>Bacteria,Cyanobacteria,Oscillatorioophycid eae,Chroococcales,Microcystis,Microcystis                           |
| 817698218 | 365 | 4 | Cyanobacteria | Microcystis aeruginosa                | 35 aeruginosa<br>Bacteria,Cyanobacteria,Oscillatorioophycid eae,Chroococcales,Microcystis,Microcystis                           |
| 488886060 | 365 | 4 | Cyanobacteria | Microcystis aeruginosa                | 35 aeruginosa<br>Bacteria,Cyanobacteria,Oscillatorioophycid eae,Chroococcales,Microcystis,Microcystis                           |
| 488880825 | 365 | 4 | Cyanobacteria | Microcystis aeruginosa                | 35 aeruginosa<br>Bacteria,Cyanobacteria,Oscillatorioophycid eae,Chroococcales,Microcystis,Microcystis                           |
| 640537249 | 365 | 4 | Cyanobacteria | Microcystis aeruginosa                | 35 aeruginosa<br>Bacteria,Cyanobacteria,Oscillatorioophycid eae,Chroococcales,Microcystis,Microcystis                           |
| 815963769 | 351 | 4 | Cyanobacteria | Microcystis aeruginosa NIES-2549      | 1 2549<br>Bacteria,Cyanobacteria,Oscillatorioophycid eae,Chroococcales,Microcystis,Microcystis                                  |
| 917762543 | 365 | 4 | Cyanobacteria | Microcystis panniformis               | 6 panniformis<br>Bacteria,Cyanobacteria,Oscillatorioophycid eae,Chroococcales,Microcystis,Microcystis                           |
| 917762473 | 365 | 4 | Cyanobacteria | Microcystis panniformis               | 6 panniformis<br>Bacteria,Cyanobacteria,Oscillatorioophycid eae,Chroococcales,Microcystis,Microcystis                           |
| 917763954 | 365 | 4 | Cyanobacteria | Microcystis panniformis               | 6 panniformis<br>Bacteria,Cyanobacteria,Oscillatorioophycid eae,Chroococcales,Microcystis,Microcystis                           |
| 917762695 | 365 | 4 | Cyanobacteria | Microcystis panniformis               | 6 panniformis<br>Bacteria,Cyanobacteria,Oscillatorioophycid eae,Chroococcales,Microcystis,Microcystis                           |
| 917761925 | 365 | 4 | Cyanobacteria | Microcystis panniformis               | 6 panniformis<br>Viruses,dsDNA viruses, no RNA stage,Caudovirales,Myoviridae,unassigned Myoviridae,Microcystis aeruginosa phage |
| 117530342 | 382 | 4 | Viruses       | Microcystis aeruginosa phage Ma-LMM01 | 1 Ma-LMM01<br>Viruses,dsDNA viruses, no RNA stage,Caudovirales,Myoviridae,unclassified Myoviridae,Microcystis phage MaMV-       |
| 525337077 | 365 | 4 | Viruses       | Microcystis phage MaMV-DC             | 1 DC<br>Bacteria,Firmicutes,Bacilli,Lactobacillales,Lactobacillaceae,Lactobacillus,Lactobacillus                                |
| 647622615 | 423 | 5 | Firmicutes    | Lactobacillus delbrueckii             | 13 delbrueckii<br>Bacteria,Firmicutes,Bacilli,Lactobacillales,Lactobacillaceae,Lactobacillus,Lactobacillus                      |
| 737176139 | 442 | 5 | Firmicutes    | Lactobacillus delbrueckii             | 13 delbrueckii<br>Bacteria,Firmicutes,Bacilli,Lactobacillales,Lactobacillaceae,Lactobacillus,Lactobacillus                      |
| 489712947 | 442 | 5 | Firmicutes    | Lactobacillus delbrueckii             | 13 delbrueckii<br>Bacteria,Firmicutes,Bacilli,Lactobacillales,Lactobacillaceae,Lactobacillus,Lactobacillus                      |
| 737199151 | 442 | 5 | Firmicutes    | Lactobacillus delbrueckii             | 13 delbrueckii                                                                                                                  |



|           |     |   |               |                                 |                                                                                                            |
|-----------|-----|---|---------------|---------------------------------|------------------------------------------------------------------------------------------------------------|
| 737185631 | 442 | 5 | Firmicutes    | Lactobacillus delbrueckii       | 13 delbrueckii<br>Bacteria,Firmicutes,Bacilli,Lactobacillales,Lactobacillaceae,Lactobacillus,Lactobacillus |
| 503204504 | 442 | 5 | Firmicutes    | Lactobacillus delbrueckii       | 13 delbrueckii<br>Bacteria,Firmicutes,Bacilli,Lactobacillales,Lactobacillaceae,Lactobacillus,Lactobacillus |
| 737186250 | 442 | 5 | Firmicutes    | Lactobacillus delbrueckii       | 13 delbrueckii<br>Bacteria,Firmicutes,Bacilli,Lactobacillales,Lactobacillaceae,Lactobacillus,Lactobacillus |
| 737198348 | 442 | 5 | Firmicutes    | Lactobacillus delbrueckii       | 13 delbrueckii<br>Bacteria,Firmicutes,Bacilli,Lactobacillales,Lactobacillaceae,Lactobacillus,Lactobacillus |
| 737174679 | 442 | 5 | Firmicutes    | Lactobacillus delbrueckii       | 13 delbrueckii<br>Bacteria,Firmicutes,Bacilli,Lactobacillales,Lactobacillaceae,Lactobacillus,Lactobacillus |
| 737179446 | 442 | 5 | Firmicutes    | Lactobacillus delbrueckii       | 13 delbrueckii<br>Bacteria,Firmicutes,Bacilli,Lactobacillales,Lactobacillaceae,Lactobacillus,Lactobacillus |
| 511762573 | 442 | 5 | Firmicutes    | Lactobacillus delbrueckii       | 13 delbrueckii<br>Bacteria,Firmicutes,Bacilli,Lactobacillales,Lactobacillaceae,Lactobacillus,Lactobacillus |
| 489707312 | 442 | 5 | Firmicutes    | Lactobacillus delbrueckii       | 13 delbrueckii<br>Bacteria,Firmicutes,Bacilli,Lactobacillales,Lactobacillaceae,Lactobacillus,Lactobacillus |
| 647622816 | 442 | 5 | Firmicutes    | Lactobacillus delbrueckii       | 13 delbrueckii<br>Bacteria,Firmicutes,Bacilli,Lactobacillales,Lactobacillaceae,Lactobacillus,Lactobacillus |
| 495738552 | 442 | 5 | Firmicutes    | Lactobacillus equicursoris      | 3 equicursoris<br>Bacteria,Firmicutes,Bacilli,Lactobacillales,Lactobacillaceae,Lactobacillus,Lactobacillus |
| 497243645 | 442 | 5 | Firmicutes    | Lactobacillus equicursoris      | 3 equicursoris<br>Bacteria,Firmicutes,Bacilli,Lactobacillales,Lactobacillaceae,Lactobacillus,Lactobacillus |
| 495738712 | 442 | 5 | Firmicutes    | Lactobacillus equicursoris      | 3 equicursoris<br>Bacteria,Cyanobacteria,Oscillatoriophyceae,Chroococcales,Microcystis,Microcystis         |
| 909655295 | 173 | 6 | Cyanobacteria | Microcystis aeruginosa          | 35 aeruginosa<br>Bacteria,Cyanobacteria,Oscillatoriophyceae,Chroococcales,Microcystis,Microcystis          |
| 488836987 | 177 | 6 | Cyanobacteria | Microcystis aeruginosa          | 35 aeruginosa<br>Bacteria,Cyanobacteria,Oscillatoriophyceae,Chroococcales,Microcystis,Microcystis          |
| 488855489 | 177 | 6 | Cyanobacteria | Microcystis aeruginosa          | 35 aeruginosa<br>Bacteria,Cyanobacteria,Oscillatoriophyceae,Chroococcales,Microcystis,Microcystis          |
| 488857866 | 177 | 6 | Cyanobacteria | Microcystis aeruginosa          | 35 aeruginosa<br>Bacteria,Cyanobacteria,Oscillatoriophyceae,Chroococcales,Microcystis,Microcystis          |
| 159030839 | 177 | 6 | Cyanobacteria | Microcystis aeruginosa PCC 7806 | 2 7806<br>Bacteria,Cyanobacteria,Oscillatoriophyceae,Chroococcales,Microcystis,Microcystis                 |
| 389767976 | 177 | 6 | Cyanobacteria | Microcystis aeruginosa PCC 7941 | 1 7941<br>Bacteria,Cyanobacteria,Oscillatoriophyceae,Chroococcales,Microcystis,Microcystis                 |
| 389800064 | 164 | 6 | Cyanobacteria | Microcystis aeruginosa PCC 9807 | 2 9807<br>Bacteria,Cyanobacteria,Oscillatoriophyceae,Chroococcales,Microcystis,Microcystis                 |

|           |     |   |               |                                     |                                                                                                                                        |
|-----------|-----|---|---------------|-------------------------------------|----------------------------------------------------------------------------------------------------------------------------------------|
| 389802092 | 177 | 6 | Cyanobacteria | Microcystis aeruginosa<br>PCC 9807  | Bacteria,Cyanobacteria,Oscillatoriophyceae,Chroococcales,Microcystis,Microcystis aeruginosa,Microcystis aeruginosa PCC 2 9807          |
| 917763287 | 164 | 6 | Cyanobacteria | Microcystis panniformis             | Bacteria,Cyanobacteria,Oscillatoriophyceae,Chroococcales,Microcystis,Microcystis 6 panniformis                                         |
| 389834663 | 177 | 6 | Cyanobacteria | Microcystis sp. T1-4                | Bacteria,Cyanobacteria,Oscillatoriophyceae,Chroococcales,Microcystis,Microcystis 2 sp. T1-4                                            |
| 489796450 | 421 | 7 | Firmicutes    | Lactobacillus salivarius            | Bacteria,Firmicutes,Bacilli,Lactobacillales,Lactobacillaceae,Lactobacillus,Lactobacillus 11 salivarius                                 |
| 736986416 | 453 | 7 | Firmicutes    | Lactobacillus salivarius            | Bacteria,Firmicutes,Bacilli,Lactobacillales,Lactobacillaceae,Lactobacillus,Lactobacillus 11 salivarius                                 |
| 736994528 | 453 | 7 | Firmicutes    | Lactobacillus salivarius            | Bacteria,Firmicutes,Bacilli,Lactobacillales,Lactobacillaceae,Lactobacillus,Lactobacillus 11 salivarius                                 |
| 736988255 | 453 | 7 | Firmicutes    | Lactobacillus salivarius            | Bacteria,Firmicutes,Bacilli,Lactobacillales,Lactobacillaceae,Lactobacillus,Lactobacillus 11 salivarius                                 |
| 489802478 | 453 | 7 | Firmicutes    | Lactobacillus salivarius            | Bacteria,Firmicutes,Bacilli,Lactobacillales,Lactobacillaceae,Lactobacillus,Lactobacillus 11 salivarius                                 |
| 490700428 | 453 | 7 | Firmicutes    | Lactobacillus salivarius            | Bacteria,Firmicutes,Bacilli,Lactobacillales,Lactobacillaceae,Lactobacillus,Lactobacillus 11 salivarius                                 |
| 574962803 | 452 | 7 | Firmicutes    | Lactobacillus salivarius<br>cp400   | Bacteria,Firmicutes,Bacilli,Lactobacillales,Lactobacillaceae,Lactobacillus,Lactobacillus 1 salivarius,Lactobacillus salivarius cp400   |
| 334307204 | 452 | 7 | Firmicutes    | Lactobacillus salivarius<br>NIAS840 | Bacteria,Firmicutes,Bacilli,Lactobacillales,Lactobacillaceae,Lactobacillus,Lactobacillus 2 salivarius,Lactobacillus salivarius NIAS840 |
| 380343618 | 452 | 7 | Firmicutes    | Lactobacillus salivarius<br>SMXD51  | Bacteria,Firmicutes,Bacilli,Lactobacillales,Lactobacillaceae,Lactobacillus,Lactobacillus 1 salivarius,Lactobacillus salivarius SMXD51  |
| 495179012 | 429 | 8 | Chloroflexi   | Ktedonobacter<br>racemifer          | Bacteria,Chloroflexi,Ktedonobacteria,Ktedonobacterales,Ktedonobacteraceae,Ktedonobacter,Ktedonobacter racemifer 52                     |
| 495190859 | 429 | 8 | Chloroflexi   | Ktedonobacter<br>racemifer          | Bacteria,Chloroflexi,Ktedonobacteria,Ktedonobacterales,Ktedonobacteraceae,Ktedonobacter,Ktedonobacter racemifer 52                     |
| 495198001 | 429 | 8 | Chloroflexi   | Ktedonobacter<br>racemifer          | Bacteria,Chloroflexi,Ktedonobacteria,Ktedonobacterales,Ktedonobacteraceae,Ktedonobacter,Ktedonobacter racemifer 52                     |
| 495197686 | 429 | 8 | Chloroflexi   | Ktedonobacter<br>racemifer          | Bacteria,Chloroflexi,Ktedonobacteria,Ktedonobacterales,Ktedonobacteraceae,Ktedonobacter,Ktedonobacter racemifer 52                     |
| 495192414 | 429 | 8 | Chloroflexi   | Ktedonobacter<br>racemifer          | Bacteria,Chloroflexi,Ktedonobacteria,Ktedonobacterales,Ktedonobacteraceae,Ktedonobacter,Ktedonobacter racemifer 52                     |
| 495184282 | 429 | 8 | Chloroflexi   | Ktedonobacter<br>racemifer          | Bacteria,Chloroflexi,Ktedonobacteria,Ktedonobacterales,Ktedonobacteraceae,Ktedonobacter,Ktedonobacter racemifer 52                     |
| 495181058 | 429 | 8 | Chloroflexi   | Ktedonobacter<br>racemifer          | Bacteria,Chloroflexi,Ktedonobacteria,Ktedonobacterales,Ktedonobacteraceae,Ktedonobacter,Ktedonobacter racemifer 52                     |

|           |     |    |                |                                 |                                                                                                                                                              |
|-----------|-----|----|----------------|---------------------------------|--------------------------------------------------------------------------------------------------------------------------------------------------------------|
| 495182429 | 429 | 8  | Chloroflexi    | Ktedonobacter racemifer         | Bacteria,Chloroflexi,Ktedonobacteria,Ktedonobacterales,Ktedonobacteraceae,Ktedonobacter,Ktedonobacter racemifer                                              |
| 504896402 | 425 | 9  | Cyanobacteria  | Anabaena sp. 90                 | Bacteria,Cyanobacteria,Nostocales,Nostocaceae,Anabaena,Anabaena sp. 90                                                                                       |
| 764892656 | 382 | 9  | Cyanobacteria  | Nodularia spumigena             | Bacteria,Cyanobacteria,Nostocales,Nostocaceae,Nodularia,Nodularia spumigena                                                                                  |
| 516414605 | 419 | 9  | Cyanobacteria  | Nodularia spumigena             | Bacteria,Cyanobacteria,Nostocales,Nostocaceae,Nodularia,Nodularia spumigena                                                                                  |
| 493210787 | 424 | 9  | Cyanobacteria  | Nodularia spumigena             | Bacteria,Cyanobacteria,Nostocales,Nostocaceae,Nodularia,Nodularia spumigena                                                                                  |
| 493207436 | 425 | 9  | Cyanobacteria  | Nodularia spumigena             | Bacteria,Cyanobacteria,Nostocales,Nostocaceae,Nodularia,Nodularia spumigena                                                                                  |
| 493212482 | 425 | 9  | Cyanobacteria  | Nodularia spumigena             | Bacteria,Cyanobacteria,Nostocales,Nostocaceae,Nodularia,Nodularia spumigena                                                                                  |
| 516414312 | 425 | 9  | Cyanobacteria  | Nodularia spumigena             | Bacteria,Cyanobacteria,Nostocales,Nostocaceae,Nodularia,Nodularia spumigena                                                                                  |
| 493208735 | 425 | 9  | Cyanobacteria  | Nodularia spumigena             | Bacteria,Cyanobacteria,Nostocales,Nostocaceae,Nodularia,Nodularia spumigena                                                                                  |
| 585119765 | 404 | 9  | Cyanobacteria  | Nodularia spumigena CCY9414     | Bacteria,Cyanobacteria,Nostocales,Nostocaceae,Nodularia,Nodularia spumigena,Nodularia spumigena CCY9414                                                      |
| 755618581 | 419 | 10 | Firmicutes     | Anoxybacillus ayderensis        | Bacteria,Firmicutes,Bacilli,Bacillales,Bacillaceae,Anoxybacillus,Anoxybacillus ayderensis                                                                    |
| 765537962 | 409 | 10 | Firmicutes     | Anoxybacillus sp. ATCC BAA-2555 | Bacteria,Firmicutes,Bacilli,Bacillales,Bacillaceae,Anoxybacillus,Anoxybacillus sp. ATCC BAA-2555                                                             |
| 503962154 | 419 | 10 | Firmicutes     | Geobacillus                     | Bacteria,Firmicutes,Bacilli,Bacillales,Bacillaceae,Geobacillus                                                                                               |
| 514404880 | 406 | 10 | Firmicutes     | Geobacillus kaustophilus GBlys  | Bacteria,Firmicutes,Bacilli,Bacillales,Bacillaceae,Geobacillus,Geobacillus kaustophilus,Geobacillus kaustophilus GBlys                                       |
| 544911901 | 420 | 10 | Firmicutes     | Geobacillus sp. A8              | Bacteria,Firmicutes,Bacilli,Bacillales,Bacillaceae,Geobacillus,Geobacillus sp. A8                                                                            |
| 836606303 | 412 | 10 | Firmicutes     | Geobacillus sp. ZGt-1           | Bacteria,Firmicutes,Bacilli,Bacillales,Bacillaceae,Geobacillus,Geobacillus sp. ZGt-1                                                                         |
| 902597013 | 409 | 10 | Firmicutes     | Geobacillus stearothermophilus  | Bacteria,Firmicutes,Bacilli,Bacillales,Bacillaceae,Geobacillus,Geobacillus stearothermophilus                                                                |
| 902592849 | 419 | 10 | Firmicutes     | Geobacillus stearothermophilus  | Bacteria,Firmicutes,Bacilli,Bacillales,Bacillaceae,Geobacillus,Geobacillus stearothermophilus                                                                |
| 618754134 | 417 | 10 | Firmicutes     | Geobacillus thermoleovorans B23 | Bacteria,Firmicutes,Bacilli,Bacillales,Bacillaceae,Geobacillus,Geobacillus thermoleovorans group,Geobacillus thermoleovorans,Geobacillus thermoleovorans B23 |
| 517216644 | 434 | 11 | Proteobacteria | Marinobacter lipolyticus        | Bacteria,Proteobacteria,Gammaproteobacteria,Alteromonadales,Alteromonadaceae,Marinobacter,Marinobacter lipolyticus                                           |

|           |     |    |                |                              |                                                                                                                                    |
|-----------|-----|----|----------------|------------------------------|------------------------------------------------------------------------------------------------------------------------------------|
| 517214180 | 436 | 11 | Proteobacteria | Marinobacter lipolyticus     | Bacteria,Proteobacteria,Gammaproteobacteria,Alteromonadales,Alteromonadaceae 4 ,Marinobacter,Marinobacter lipolyticus              |
| 494593180 | 434 | 11 | Proteobacteria | Marinobacter sp. ELB17       | Bacteria,Proteobacteria,Gammaproteobacteria,Alteromonadales,Alteromonadaceae 9 ,Marinobacter,Marinobacter sp. ELB17                |
| 494591835 | 434 | 11 | Proteobacteria | Marinobacter sp. ELB17       | Bacteria,Proteobacteria,Gammaproteobacteria,Alteromonadales,Alteromonadaceae 9 ,Marinobacter,Marinobacter sp. ELB17                |
| 738230227 | 434 | 11 | Proteobacteria | Marinobacter sp. ELB17       | Bacteria,Proteobacteria,Gammaproteobacteria,Alteromonadales,Alteromonadaceae 9 ,Marinobacter,Marinobacter sp. ELB17                |
| 494592943 | 434 | 11 | Proteobacteria | Marinobacter sp. ELB17       | Bacteria,Proteobacteria,Gammaproteobacteria,Alteromonadales,Alteromonadaceae 9 ,Marinobacter,Marinobacter sp. ELB17                |
| 494592612 | 434 | 11 | Proteobacteria | Marinobacter sp. ELB17       | Bacteria,Proteobacteria,Gammaproteobacteria,Alteromonadales,Alteromonadaceae 9 ,Marinobacter,Marinobacter sp. ELB17                |
| 755615045 | 426 | 12 | Firmicutes     | Anoxybacillus ayderensis     | Bacteria,Firmicutes,Bacilli,Bacillales,Bacillaceae,Anoxybacillus,Anoxybacillus 3 ayderensis                                        |
| 755177284 | 438 | 12 | Firmicutes     | Anoxybacillus ayderensis     | Bacteria,Firmicutes,Bacilli,Bacillales,Bacillaceae,Anoxybacillus,Anoxybacillus 3 ayderensis                                        |
| 491030539 | 426 | 12 | Firmicutes     | Anoxybacillus flavithermus   | Bacteria,Firmicutes,Bacilli,Bacillales,Bacillaceae,Anoxybacillus,Anoxybacillus 6 flavithermus                                      |
| 491027649 | 426 | 12 | Firmicutes     | Anoxybacillus flavithermus   | Bacteria,Firmicutes,Bacilli,Bacillales,Bacillaceae,Anoxybacillus,Anoxybacillus 6 flavithermus                                      |
| 493364910 | 426 | 12 | Firmicutes     | Anoxybacillus flavithermus   | Bacteria,Firmicutes,Bacilli,Bacillales,Bacillaceae,Anoxybacillus,Anoxybacillus 6 flavithermus                                      |
| 491030759 | 434 | 12 | Firmicutes     | Anoxybacillus flavithermus   | Bacteria,Firmicutes,Bacilli,Bacillales,Bacillaceae,Anoxybacillus,Anoxybacillus 6 flavithermus                                      |
| 544660233 | 426 | 12 | Firmicutes     | Anoxybacillus sp. SK3-4      | Bacteria,Firmicutes,Clostridia,Clostridiales ,Clostridiaceae,Youngiibacter,Youngiibacter 1 4                                       |
| 917405157 | 404 | 13 | Firmicutes     | Youngiibacter fragilis       | Bacteria,Firmicutes,Clostridia,Clostridiales ,Clostridiaceae,Youngiibacter,Youngiibacter 4 r fragilis                              |
| 917405158 | 404 | 13 | Firmicutes     | Youngiibacter fragilis       | Bacteria,Firmicutes,Clostridia,Clostridiales ,Clostridiaceae,Youngiibacter,Youngiibacter 4 r fragilis                              |
| 917405134 | 404 | 13 | Firmicutes     | Youngiibacter fragilis       | Bacteria,Firmicutes,Clostridia,Clostridiales ,Clostridiaceae,Youngiibacter,Youngiibacter 4 r fragilis                              |
| 750625864 | 404 | 13 | Firmicutes     | Youngiibacter fragilis       | Bacteria,Firmicutes,Clostridia,Clostridiales ,Clostridiaceae,Youngiibacter,Youngiibacter 4 r fragilis                              |
| 564132572 | 416 | 13 | Firmicutes     | Youngiibacter fragilis 232.1 | Bacteria,Firmicutes,Clostridia,Clostridiales ,Clostridiaceae,Youngiibacter,Youngiibacter 7 r fragilis,Youngiibacter fragilis 232.1 |

|           |     |    |                |                                                |                                                                                                                                                                                          |
|-----------|-----|----|----------------|------------------------------------------------|------------------------------------------------------------------------------------------------------------------------------------------------------------------------------------------|
| 564132569 | 416 | 13 | Firmicutes     | Youngiibacter fragilis<br>232.1                | Bacteria,Firmicutes,Clostridia,Clostridiales<br>,Clostridiaceae,Youngiibacter,Youngiibacte<br>7 r fragilis,Youngiibacter fragilis 232.1                                                  |
| 564133424 | 416 | 13 | Firmicutes     | Youngiibacter fragilis<br>232.1                | Bacteria,Firmicutes,Clostridia,Clostridiales<br>,Clostridiaceae,Youngiibacter,Youngiibacte<br>7 r fragilis,Youngiibacter fragilis 232.1                                                  |
| 524001916 | 414 | 14 | Proteobacteria | Parasutterella<br>excrementihominis<br>CAG:233 | Bacteria,Proteobacteria,Betaproteobacter<br>ia,Burkholderiales,Sutterellaceae,Parasutt<br>erella,environmental<br>samples,Parasutterella excrementihominis<br>2 CAG:233                  |
| 496140621 | 414 | 14 | Proteobacteria | Parasutterella<br>excrementihominis            | Bacteria,Proteobacteria,Betaproteobacter<br>ia,Burkholderiales,Sutterellaceae,Parasutt<br>4 erella,Parasutterella excrementihominis                                                      |
| 496140300 | 414 | 14 | Proteobacteria | Parasutterella<br>excrementihominis            | Bacteria,Proteobacteria,Betaproteobacter<br>ia,Burkholderiales,Sutterellaceae,Parasutt<br>4 erella,Parasutterella excrementihominis                                                      |
| 748638366 | 398 | 14 | Proteobacteria | Burkholderiales<br>bacterium 1_1_47            | Bacteria,Proteobacteria,Betaproteobacter<br>ia,Burkholderiales,unclassified<br>Burkholderiales,unclassified<br>Burkholderiales<br>(miscellaneous),Burkholderiales<br>14 bacterium 1_1_47 |
| 302858730 | 411 | 14 | Proteobacteria | Burkholderiales<br>bacterium 1_1_47            | Bacteria,Proteobacteria,Betaproteobacter<br>ia,Burkholderiales,unclassified<br>Burkholderiales,unclassified<br>Burkholderiales<br>(miscellaneous),Burkholderiales<br>14 bacterium 1_1_47 |
| 496086763 | 414 | 14 | Proteobacteria | Burkholderiales<br>bacterium 1_1_47            | Bacteria,Proteobacteria,Betaproteobacter<br>ia,Burkholderiales,unclassified<br>Burkholderiales,unclassified<br>Burkholderiales<br>(miscellaneous),Burkholderiales<br>14 bacterium 1_1_47 |
| 524280884 | 396 | 14 | Proteobacteria | Proteobacteria<br>bacterium CAG:139            | Bacteria,Proteobacteria,environmental<br>samples,Proteobacteria bacterium<br>1 CAG:139                                                                                                   |
| 815716624 | 414 | 14 | Proteobacteria | Acinetobacter sp.<br>N54.MGS-139               | Bacteria,Proteobacteria,Gammaproteobac<br>teria,Pseudomonadales,Moraxellaceae,Aci<br>netobacter,Acinetobacter sp. N54.MGS-<br>1 139                                                      |
| 740164447 | 400 | 15 | Proteobacteria | Sutterella<br>wadsworthensis                   | Bacteria,Proteobacteria,Betaproteobacter<br>ia,Burkholderiales,Sutterellaceae,Sutterell<br>8 a,Sutterella wadsworthensis                                                                 |
| 740163468 | 400 | 15 | Proteobacteria | Sutterella<br>wadsworthensis                   | Bacteria,Proteobacteria,Betaproteobacter<br>ia,Burkholderiales,Sutterellaceae,Sutterell<br>8 a,Sutterella wadsworthensis                                                                 |
| 740163470 | 400 | 15 | Proteobacteria | Sutterella<br>wadsworthensis                   | Bacteria,Proteobacteria,Betaproteobacter<br>ia,Burkholderiales,Sutterellaceae,Sutterell<br>8 a,Sutterella wadsworthensis                                                                 |
| 740164133 | 400 | 15 | Proteobacteria | Sutterella<br>wadsworthensis                   | Bacteria,Proteobacteria,Betaproteobacter<br>ia,Burkholderiales,Sutterellaceae,Sutterell<br>8 a,Sutterella wadsworthensis                                                                 |

|           |     |    |                |                                          |                                                                                                                                                                |
|-----------|-----|----|----------------|------------------------------------------|----------------------------------------------------------------------------------------------------------------------------------------------------------------|
| 404657206 | 390 | 15 | Proteobacteria | Sutterella wadsworthensis 2_1_59BFAA     | Bacteria,Proteobacteria,Betaproteobacteria,Burkholderiales,Sutterellaceae,Sutterella,Sutterella wadsworthensis,Sutterella wadsworthensis 2_1_59BFAA            |
| 404658376 | 390 | 15 | Proteobacteria | Sutterella wadsworthensis 2_1_59BFAA     | Bacteria,Proteobacteria,Betaproteobacteria,Burkholderiales,Sutterellaceae,Sutterella,Sutterella wadsworthensis,Sutterella wadsworthensis 2_1_59BFAA            |
| 404658162 | 390 | 15 | Proteobacteria | Sutterella wadsworthensis 2_1_59BFAA     | Bacteria,Proteobacteria,Betaproteobacteria,Burkholderiales,Sutterellaceae,Sutterella,Sutterella wadsworthensis,Sutterella wadsworthensis 2_1_59BFAA            |
| 404657559 | 390 | 15 | Proteobacteria | Sutterella wadsworthensis 2_1_59BFAA     | Bacteria,Proteobacteria,Betaproteobacteria,Burkholderiales,Sutterellaceae,Sutterella,Sutterella wadsworthensis,Sutterella wadsworthensis 2_1_59BFAA            |
| 696533158 | 437 | 16 | Firmicutes     | Clostridium botulinum                    | Bacteria,Firmicutes,Clostridia,Clostridiales,Clostridiaceae,Clostridium,Clostridium botulinum                                                                  |
| 752487288 | 437 | 16 | Firmicutes     | Clostridium botulinum                    | Bacteria,Firmicutes,Clostridia,Clostridiales,Clostridiaceae,Clostridium,Clostridium botulinum                                                                  |
| 696533105 | 437 | 16 | Firmicutes     | Clostridium botulinum                    | Bacteria,Firmicutes,Clostridia,Clostridiales,Clostridiaceae,Clostridium,Clostridium botulinum                                                                  |
| 752487569 | 437 | 16 | Firmicutes     | Clostridium botulinum                    | Bacteria,Firmicutes,Clostridia,Clostridiales,Clostridiaceae,Clostridium,Clostridium botulinum                                                                  |
| 749188410 | 440 | 16 | Firmicutes     | Clostridium botulinum                    | Bacteria,Firmicutes,Clostridia,Clostridiales,Clostridiaceae,Clostridium,Clostridium botulinum                                                                  |
| 169408891 | 440 | 16 | Firmicutes     | Clostridium botulinum A3 str. Loch Maree | Bacteria,Firmicutes,Clostridia,Clostridiales,Clostridiaceae,Clostridium,Clostridium botulinum,Clostridium botulinum A,Clostridium botulinum A3 str. Loch Maree |
| 229260342 | 445 | 16 | Firmicutes     | Clostridium botulinum Ba4 str. 657       | Bacteria,Firmicutes,Clostridia,Clostridiales,Clostridiaceae,Clostridium,Clostridium botulinum,Clostridium botulinum Ba4 str. 657                               |
| 493720362 | 379 | 17 | Cyanobacteria  | Arthrospira                              | Bacteria,Cyanobacteria,Oscillatoriophyceae,Oscillatoriales,Arthrospira                                                                                         |
| 493671347 | 380 | 17 | Cyanobacteria  | Arthrospira                              | Bacteria,Cyanobacteria,Oscillatoriophyceae,Oscillatoriales,Arthrospira                                                                                         |
| 493718402 | 380 | 17 | Cyanobacteria  | Arthrospira                              | Bacteria,Cyanobacteria,Oscillatoriophyceae,Oscillatoriales,Arthrospira                                                                                         |
| 493670882 | 379 | 17 | Cyanobacteria  | Arthrospira platensis                    | Bacteria,Cyanobacteria,Oscillatoriophyceae,Oscillatoriales,Arthrospira,Arthrospira platensis                                                                   |
| 375323701 | 350 | 17 | Cyanobacteria  | Arthrospira sp. PCC 8005                 | Bacteria,Cyanobacteria,Oscillatoriophyceae,Oscillatoriales,Arthrospira,Arthrospira sp. PCC 8005                                                                |
| 375324149 | 351 | 17 | Cyanobacteria  | Arthrospira sp. PCC 8005                 | Bacteria,Cyanobacteria,Oscillatoriophyceae,Oscillatoriales,Arthrospira,Arthrospira sp. PCC 8005                                                                |
| 890645632 | 379 | 17 | Cyanobacteria  | Arthrospira sp. PCC 8005                 | Bacteria,Cyanobacteria,Oscillatoriophyceae,Oscillatoriales,Arthrospira,Arthrospira sp. PCC 8005                                                                |

|           |     |    |                |                                 |                                                                                                                                          |
|-----------|-----|----|----------------|---------------------------------|------------------------------------------------------------------------------------------------------------------------------------------|
| 493575037 | 136 | 18 | Cyanobacteria  | Gloeocapsa sp. PCC 73106        | Bacteria,Cyanobacteria,Oscillatorioophycid eae,Chroococcales,Gloeocapsa,Gloeocaps 24 a sp. PCC 73106                                     |
| 493576568 | 146 | 18 | Cyanobacteria  | Gloeocapsa sp. PCC 73106        | Bacteria,Cyanobacteria,Oscillatorioophycid eae,Chroococcales,Gloeocapsa,Gloeocaps 24 a sp. PCC 73106                                     |
| 493574048 | 146 | 18 | Cyanobacteria  | Gloeocapsa sp. PCC 73106        | Bacteria,Cyanobacteria,Oscillatorioophycid eae,Chroococcales,Gloeocapsa,Gloeocaps 24 a sp. PCC 73106                                     |
| 493574420 | 153 | 18 | Cyanobacteria  | Gloeocapsa sp. PCC 73106        | Bacteria,Cyanobacteria,Oscillatorioophycid eae,Chroococcales,Gloeocapsa,Gloeocaps 24 a sp. PCC 73106                                     |
| 493574344 | 154 | 18 | Cyanobacteria  | Gloeocapsa sp. PCC 73106        | Bacteria,Cyanobacteria,Oscillatorioophycid eae,Chroococcales,Gloeocapsa,Gloeocaps 24 a sp. PCC 73106                                     |
| 493576467 | 155 | 18 | Cyanobacteria  | Gloeocapsa sp. PCC 73106        | Bacteria,Cyanobacteria,Oscillatorioophycid eae,Chroococcales,Gloeocapsa,Gloeocaps 24 a sp. PCC 73106                                     |
| 493575899 | 155 | 18 | Cyanobacteria  | Gloeocapsa sp. PCC 73106        | Bacteria,Cyanobacteria,Oscillatorioophycid eae,Chroococcales,Gloeocapsa,Gloeocaps 24 a sp. PCC 73106                                     |
| 544688317 | 429 | 19 | Proteobacteria | Salipiger mucosus               | Bacteria,Proteobacteria,Alphaproteobacte ria,Rhodobacterales,Rhodobacteraceae,Sa 4 lipiger,Salipiger mucosus                             |
| 739512799 | 429 | 19 | Proteobacteria | Salipiger mucosus               | Bacteria,Proteobacteria,Alphaproteobacte ria,Rhodobacterales,Rhodobacteraceae,Sa 4 lipiger,Salipiger mucosus                             |
| 739511681 | 429 | 19 | Proteobacteria | Salipiger mucosus               | Bacteria,Proteobacteria,Alphaproteobacte ria,Rhodobacterales,Rhodobacteraceae,Sa 4 lipiger,Salipiger mucosus                             |
| 528096348 | 396 | 19 | Proteobacteria | Salipiger mucosus DSM 16094     | Bacteria,Proteobacteria,Alphaproteobacte ria,Rhodobacterales,Rhodobacteraceae,Sa lipiger,Salipiger mucosus,Salipiger 2 mucosus DSM 16094 |
| 528101823 | 396 | 19 | Proteobacteria | Salipiger mucosus DSM 16094     | Bacteria,Proteobacteria,Alphaproteobacte ria,Rhodobacterales,Rhodobacteraceae,Sa lipiger,Salipiger mucosus,Salipiger 2 mucosus DSM 16094 |
| 513846822 | 253 | 20 | Cyanobacteria  | Microcystis aeruginosa          | Bacteria,Cyanobacteria,Oscillatorioophycid eae,Chroococcales,Microcystis,Microcystis 35 aeruginosa                                       |
| 754187657 | 253 | 20 | Cyanobacteria  | Microcystis aeruginosa          | Bacteria,Cyanobacteria,Oscillatorioophycid eae,Chroococcales,Microcystis,Microcystis 35 aeruginosa                                       |
| 488839845 | 253 | 20 | Cyanobacteria  | Microcystis aeruginosa          | Bacteria,Cyanobacteria,Oscillatorioophycid eae,Chroococcales,Microcystis,Microcystis 35 aeruginosa                                       |
| 490262043 | 253 | 20 | Cyanobacteria  | Microcystis aeruginosa          | Bacteria,Cyanobacteria,Oscillatorioophycid eae,Chroococcales,Microcystis,Microcystis 35 aeruginosa                                       |
| 763155486 | 267 | 20 | Cyanobacteria  | Microcystis aeruginosa          | Bacteria,Cyanobacteria,Oscillatorioophycid eae,Chroococcales,Microcystis,Microcystis 35 aeruginosa                                       |
| 166088064 | 239 | 20 | Cyanobacteria  | Microcystis aeruginosa NIES-843 | Bacteria,Cyanobacteria,Oscillatorioophycid eae,Chroococcales,Microcystis,Microcystis aeruginosa,Microcystis aeruginosa NIES- 2 843       |
| 516259361 | 427 | 21 | Cyanobacteria  | Geitlerinema sp. PCC 7105       | Bacteria,Cyanobacteria,Oscillatorioophycid eae,Oscillatoriales,Geitlerinema,Geitlerine 18 ma sp. PCC 7105                                |

|           |     |    |               |                                         |                                                                                                                                                      |
|-----------|-----|----|---------------|-----------------------------------------|------------------------------------------------------------------------------------------------------------------------------------------------------|
| 516259032 | 427 | 21 | Cyanobacteria | Geitlerinema sp. PCC 7105               | Bacteria,Cyanobacteria,Oscillatoriophycid eae,Oscillatoriales,Geitlerinema,Geitlerine ma sp. PCC 7105                                                |
| 516257403 | 444 | 21 | Cyanobacteria | Geitlerinema sp. PCC 7105               | Bacteria,Cyanobacteria,Oscillatoriophycid eae,Oscillatoriales,Geitlerinema,Geitlerine ma sp. PCC 7105                                                |
| 516257346 | 460 | 21 | Cyanobacteria | Geitlerinema sp. PCC 7105               | Bacteria,Cyanobacteria,Oscillatoriophycid eae,Oscillatoriales,Geitlerinema,Geitlerine ma sp. PCC 7105                                                |
| 750141485 | 429 | 22 | Chloroflexi   | Ktedonobacter racemifer                 | Bacteria,Chloroflexi,Ktedonobacteria,Ktedonobacterales,Ktedonobacteraceae,Ktedonobacter,Ktedonobacter racemifer                                      |
| 495191494 | 429 | 22 | Chloroflexi   | Ktedonobacter racemifer                 | Bacteria,Chloroflexi,Ktedonobacteria,Ktedonobacterales,Ktedonobacteraceae,Ktedonobacter,Ktedonobacter racemifer                                      |
| 750138303 | 429 | 22 | Chloroflexi   | Ktedonobacter racemifer                 | Bacteria,Chloroflexi,Ktedonobacteria,Ktedonobacterales,Ktedonobacteraceae,Ktedonobacter,Ktedonobacter racemifer                                      |
| 297550437 | 451 | 22 | Chloroflexi   | Ktedonobacter racemifer DSM 44963       | Bacteria,Chloroflexi,Ktedonobacteria,Ktedonobacterales,Ktedonobacteraceae,Ktedonobacter,Ktedonobacter racemifer DSM 44963                            |
| 297556221 | 451 | 22 | Chloroflexi   | Ktedonobacter racemifer DSM 44963       | Bacteria,Chloroflexi,Ktedonobacteria,Ktedonobacterales,Ktedonobacteraceae,Ktedonobacter,Ktedonobacter racemifer DSM 44963                            |
| 737470902 | 433 | 23 | Firmicutes    | Lactobacillus composti                  | Bacteria,Firmicutes,Bacilli,Lactobacillales,Lactobacillaceae,Lactobacillus,Lactobacillus composti                                                    |
| 737472716 | 433 | 23 | Firmicutes    | Lactobacillus composti                  | Bacteria,Firmicutes,Bacilli,Lactobacillales,Lactobacillaceae,Lactobacillus,Lactobacillus composti                                                    |
| 737471974 | 434 | 23 | Firmicutes    | Lactobacillus composti                  | Bacteria,Firmicutes,Bacilli,Lactobacillales,Lactobacillaceae,Lactobacillus,Lactobacillus composti                                                    |
| 737471968 | 434 | 23 | Firmicutes    | Lactobacillus composti                  | Bacteria,Firmicutes,Bacilli,Lactobacillales,Lactobacillaceae,Lactobacillus,Lactobacillus composti                                                    |
| 737470939 | 434 | 23 | Firmicutes    | Lactobacillus composti                  | Bacteria,Firmicutes,Bacilli,Lactobacillales,Lactobacillaceae,Lactobacillus,Lactobacillus composti                                                    |
| 763348503 | 361 | 24 | Cyanobacteria | Coleofasciculus chthonoplastes          | Bacteria,Cyanobacteria,Oscillatoriophycid eae,Oscillatoriales,Coleofasciculus,Coleofasciculus chthonoplastes                                         |
| 493036497 | 395 | 24 | Cyanobacteria | Coleofasciculus chthonoplastes          | Bacteria,Cyanobacteria,Oscillatoriophycid eae,Oscillatoriales,Coleofasciculus,Coleofasciculus chthonoplastes                                         |
| 493031176 | 396 | 24 | Cyanobacteria | Coleofasciculus chthonoplastes          | Bacteria,Cyanobacteria,Oscillatoriophycid eae,Oscillatoriales,Coleofasciculus,Coleofasciculus chthonoplastes                                         |
| 196180960 | 433 | 24 | Cyanobacteria | Coleofasciculus chthonoplastes PCC 7420 | Bacteria,Cyanobacteria,Oscillatoriophycid eae,Oscillatoriales,Coleofasciculus,Coleofasciculus chthonoplastes,Coleofasciculus chthonoplastes PCC 7420 |
| 511077203 | 384 | 25 | Firmicutes    | Firmicutes bacterium M10-2              | Bacteria,Firmicutes,unclassified Firmicutes sensu stricto,unclassified Firmicutes sensu stricto (miscellaneous),Firmicutes bacterium M10-2           |



|           |     |    |               |                                  |                                                                                                                                                 |
|-----------|-----|----|---------------|----------------------------------|-------------------------------------------------------------------------------------------------------------------------------------------------|
| 737132088 | 404 | 25 | Firmicutes    | Firmicutes bacterium M10-2       | Bacteria,Firmicutes,unclassified Firmicutes sensu stricto,unclassified Firmicutes sensu stricto (miscellaneous),Firmicutes<br>5 bacterium M10-2 |
| 737132074 | 404 | 25 | Firmicutes    | Firmicutes bacterium M10-2       | Bacteria,Firmicutes,unclassified Firmicutes sensu stricto,unclassified Firmicutes sensu stricto (miscellaneous),Firmicutes<br>5 bacterium M10-2 |
| 507803517 | 416 | 25 | Firmicutes    | Firmicutes bacterium M10-2       | Bacteria,Firmicutes,unclassified Firmicutes sensu stricto,unclassified Firmicutes sensu stricto (miscellaneous),Firmicutes<br>5 bacterium M10-2 |
| 507803696 | 416 | 25 | Firmicutes    | Firmicutes bacterium M10-2       | Bacteria,Firmicutes,unclassified Firmicutes sensu stricto,unclassified Firmicutes sensu stricto (miscellaneous),Firmicutes<br>5 bacterium M10-2 |
| 494521216 | 379 | 26 | Cyanobacteria | Crocospaera watsonii             | Bacteria,Cyanobacteria,Oscillatoriophyceae,Chroococcales,Crocospaera,Crocosp<br>14 haera watsonii                                               |
| 546219268 | 379 | 26 | Cyanobacteria | Crocospaera watsonii             | Bacteria,Cyanobacteria,Oscillatoriophyceae,Chroococcales,Crocospaera,Crocosp<br>14 haera watsonii                                               |
| 546208388 | 379 | 26 | Cyanobacteria | Crocospaera watsonii             | Bacteria,Cyanobacteria,Oscillatoriophyceae,Chroococcales,Crocospaera,Crocosp<br>14 haera watsonii                                               |
| 546232739 | 379 | 26 | Cyanobacteria | Crocospaera watsonii             | Bacteria,Cyanobacteria,Oscillatoriophyceae,Chroococcales,Crocospaera,Crocosp<br>14 haera watsonii                                               |
| 494515958 | 379 | 26 | Cyanobacteria | Crocospaera watsonii             | Bacteria,Cyanobacteria,Oscillatoriophyceae,Chroococcales,Crocospaera,Crocosp<br>14 haera watsonii                                               |
| 251771045 | 513 | 27 | Nitrospirae   | Leptospirillum ferrodiazotrophum | Bacteria,Nitrospirae,Nitrospira,Nitrospirales,Nitrospiraceae,Leptospirillum,Leptospirillum sp. Group III,Leptospirillum<br>14 ferrodiazotrophum |
| 251771513 | 517 | 27 | Nitrospirae   | Leptospirillum ferrodiazotrophum | Bacteria,Nitrospirae,Nitrospira,Nitrospirales,Nitrospiraceae,Leptospirillum,Leptospirillum sp. Group III,Leptospirillum<br>14 ferrodiazotrophum |
| 251771487 | 517 | 27 | Nitrospirae   | Leptospirillum ferrodiazotrophum | Bacteria,Nitrospirae,Nitrospira,Nitrospirales,Nitrospiraceae,Leptospirillum,Leptospirillum sp. Group III,Leptospirillum<br>14 ferrodiazotrophum |
| 251770992 | 517 | 27 | Nitrospirae   | Leptospirillum ferrodiazotrophum | Bacteria,Nitrospirae,Nitrospira,Nitrospirales,Nitrospiraceae,Leptospirillum,Leptospirillum sp. Group III,Leptospirillum<br>14 ferrodiazotrophum |
| 530562619 | 471 | 28 | Euryarchaeota | Ferroplasma sp. Type II          | Archaea,Euryarchaeota,Thermoplasmata,Thermoplasmatales,Ferroplasmaceae,Ferroplasma,environmental<br>16 samples,Ferroplasma sp. Type II          |
| 530560308 | 475 | 28 | Euryarchaeota | Ferroplasma sp. Type II          | Archaea,Euryarchaeota,Thermoplasmata,Thermoplasmatales,Ferroplasmaceae,Ferroplasma,environmental<br>16 samples,Ferroplasma sp. Type II          |

|           |     |    |                |                                  |                                                                                                                                                 |
|-----------|-----|----|----------------|----------------------------------|-------------------------------------------------------------------------------------------------------------------------------------------------|
| 530563372 | 475 | 28 | Euryarchaeota  | Ferroplasma sp. Type II          | Archaea,Euryarchaeota,Thermoplasmata, Thermoplasmatales,Ferroplasmaceae,Ferroplasma,environmental<br>16 samples,Ferroplasma sp. Type II         |
| 530562068 | 475 | 28 | Euryarchaeota  | Ferroplasma sp. Type II          | Archaea,Euryarchaeota,Thermoplasmata, Thermoplasmatales,Ferroplasmaceae,Ferroplasma,environmental<br>16 samples,Ferroplasma sp. Type II         |
| 916888290 | 456 | 29 | Proteobacteria | Burkholderia sp. BT03            | Bacteria,Proteobacteria,Betaproteobacteria,Burkholderiales,Burkholderiaceae,Burkholderia,Burkholderia sp. BT03                                  |
| 576726017 | 469 | 29 | Proteobacteria | Burkholderia sp. BT03            | Bacteria,Proteobacteria,Betaproteobacteria,Burkholderiales,Burkholderiaceae,Burkholderia,Burkholderia sp. BT03                                  |
| 916323178 | 456 | 29 | Proteobacteria | Burkholderia terrae              | Bacteria,Proteobacteria,Betaproteobacteria,Burkholderiales,Burkholderiaceae,Burkholderia,Burkholderia terrae                                    |
| 389936164 | 469 | 29 | Proteobacteria | Burkholderia terrae BS001        | Bacteria,Nitrospirae,Nitrospira,Nitrospirales,Nitrospiraceae,Leptospirillum,Leptospirillum sp. Group III,Leptospirillum                         |
| 251772633 | 443 | 30 | Nitrospirae    | Leptospirillum ferrodiazotrophum | 14 ferrodiazotrophum<br>Bacteria,Nitrospirae,Nitrospira,Nitrospirales,Nitrospiraceae,Leptospirillum,Leptospirillum sp. Group III,Leptospirillum |
| 251771704 | 456 | 30 | Nitrospirae    | Leptospirillum ferrodiazotrophum | 14 ferrodiazotrophum<br>Bacteria,Nitrospirae,Nitrospira,Nitrospirales,Nitrospiraceae,Leptospirillum,Leptospirillum sp. Group III,Leptospirillum |
| 251773312 | 456 | 30 | Nitrospirae    | Leptospirillum ferrodiazotrophum | 14 ferrodiazotrophum<br>Bacteria,Nitrospirae,Nitrospira,Nitrospirales,Nitrospiraceae,Leptospirillum,Leptospirillum sp. Group III,Leptospirillum |
| 251771591 | 456 | 30 | Nitrospirae    | Leptospirillum ferrodiazotrophum | 14 ferrodiazotrophum<br>Bacteria,Nitrospirae,Nitrospira,Nitrospirales,Nitrospiraceae,Leptospirillum,Leptospirillum sp. Group III,Leptospirillum |
| 916345279 | 452 | 31 | Proteobacteria | Marinobacter lipolyticus         | Bacteria,Proteobacteria,Gammaproteobacteria,Alteromonadales,Alteromonadaceae 4 ,Marinobacter,Marinobacter lipolyticus                           |
| 494592450 | 434 | 31 | Proteobacteria | Marinobacter sp. ELB17           | Bacteria,Proteobacteria,Gammaproteobacteria,Alteromonadales,Alteromonadaceae 9 ,Marinobacter,Marinobacter sp. ELB17                             |
| 494591841 | 434 | 31 | Proteobacteria | Marinobacter sp. ELB17           | Bacteria,Proteobacteria,Gammaproteobacteria,Alteromonadales,Alteromonadaceae 9 ,Marinobacter,Marinobacter sp. ELB17                             |
| 494590156 | 434 | 31 | Proteobacteria | Marinobacter sp. ELB17           | Bacteria,Proteobacteria,Gammaproteobacteria,Alteromonadales,Alteromonadaceae 9 ,Marinobacter,Marinobacter sp. ELB17                             |
| 502735286 | 449 | 32 | Proteobacteria | Allochromatium vinosum           | Bacteria,Proteobacteria,Gammaproteobacteria,Chromatiales,Chromatiaceae,Allochromatium,Allochromatium vinosum                                    |
| 502735669 | 449 | 32 | Proteobacteria | Allochromatium vinosum           | Bacteria,Proteobacteria,Gammaproteobacteria,Chromatiales,Chromatiaceae,Allochromatium,Allochromatium vinosum                                    |
| 502736417 | 449 | 32 | Proteobacteria | Allochromatium vinosum           | Bacteria,Proteobacteria,Gammaproteobacteria,Chromatiales,Chromatiaceae,Allochromatium,Allochromatium vinosum                                    |

|           |     |    |                |                                   |                                                                                                                                                     |
|-----------|-----|----|----------------|-----------------------------------|-----------------------------------------------------------------------------------------------------------------------------------------------------|
| 502735804 | 449 | 32 | Proteobacteria | Allochromatium vinosum            | Bacteria,Proteobacteria,Gammaproteobacteria,Chromatiales,Chromatiaceae,Allochromatium,Allochromatium vinosum                                        |
| 489801486 | 434 | 33 | Firmicutes     | Lactobacillus salivarius          | Bacteria,Firmicutes,Bacilli,Lactobacillales,Lactobacillaceae,Lactobacillus,Lactobacillus salivarius                                                 |
| 763126085 | 440 | 33 | Firmicutes     | Lactobacillus salivarius          | Bacteria,Firmicutes,Bacilli,Lactobacillales,Lactobacillaceae,Lactobacillus,Lactobacillus salivarius                                                 |
| 736994526 | 442 | 33 | Firmicutes     | Lactobacillus salivarius          | Bacteria,Firmicutes,Bacilli,Lactobacillales,Lactobacillaceae,Lactobacillus,Lactobacillus salivarius                                                 |
| 334307171 | 434 | 33 | Firmicutes     | Lactobacillus salivarius NIAS840  | Bacteria,Firmicutes,Bacilli,Lactobacillales,Lactobacillaceae,Lactobacillus,Lactobacillus salivarius,Lactobacillus salivarius NIAS840                |
| 495198391 | 429 | 34 | Chloroflexi    | Ktedonobacter racemifer           | Bacteria,Chloroflexi,Ktedonobacteria,Ktedonobacteriales,Ktedonobacteraceae,Ktedonobacter,Ktedonobacter racemifer                                    |
| 495182125 | 429 | 34 | Chloroflexi    | Ktedonobacter racemifer           | Bacteria,Chloroflexi,Ktedonobacteria,Ktedonobacteriales,Ktedonobacteraceae,Ktedonobacter,Ktedonobacter racemifer                                    |
| 750138239 | 430 | 34 | Chloroflexi    | Ktedonobacter racemifer           | Bacteria,Chloroflexi,Ktedonobacteria,Ktedonobacteriales,Ktedonobacteraceae,Ktedonobacter,Ktedonobacter racemifer                                    |
| 297556095 | 429 | 34 | Chloroflexi    | Ktedonobacter racemifer DSM 44963 | Bacteria,Chloroflexi,Ktedonobacteria,Ktedonobacteriales,Ktedonobacteraceae,Ktedonobacter,Ktedonobacter racemifer, Ktedonobacter racemifer DSM 44963 |
| 78499555  | 425 | 35 | Cyanobacteria  | Arthrospira platensis             | Bacteria,Cyanobacteria,Oscillatoriophycideae,Oscillatoriales,Arthrospira,Arthrospira platensis                                                      |
| 504041472 | 425 | 35 | Cyanobacteria  | Arthrospira platensis             | Bacteria,Cyanobacteria,Oscillatoriophycideae,Oscillatoriales,Arthrospira,Arthrospira platensis                                                      |
| 504041485 | 429 | 35 | Cyanobacteria  | Arthrospira platensis             | Bacteria,Cyanobacteria,Oscillatoriophycideae,Oscillatoriales,Arthrospira,Arthrospira platensis                                                      |
| 737767765 | 429 | 35 | Cyanobacteria  | Arthrospira platensis             | Bacteria,Cyanobacteria,Oscillatoriophycideae,Oscillatoriales,Arthrospira,Arthrospira platensis                                                      |
| 357264392 | 427 | 36 | Cyanobacteria  | Crocospaera watsonii WH 0003      | Bacteria,Cyanobacteria,Oscillatoriophycideae,Chroococcales,Crocospaera,Crocospaera watsonii,Crocospaera watsonii WH 0003                            |
| 543527372 | 401 | 36 | Cyanobacteria  | Crocospaera watsonii WH 0005      | Bacteria,Cyanobacteria,Oscillatoriophycideae,Chroococcales,Crocospaera,Crocospaera watsonii,Crocospaera watsonii WH 0005                            |
| 543431877 | 401 | 36 | Cyanobacteria  | Crocospaera watsonii WH 0401      | Bacteria,Cyanobacteria,Oscillatoriophycideae,Chroococcales,Crocospaera,Crocospaera watsonii,Crocospaera watsonii WH 0401                            |
| 67855965  | 401 | 36 | Cyanobacteria  | Crocospaera watsonii WH 8501      | Bacteria,Cyanobacteria,Oscillatoriophycideae,Chroococcales,Crocospaera,Crocospaera watsonii,Crocospaera watsonii WH 8501                            |
| 516255434 | 382 | 37 | Cyanobacteria  | Geitlerinema sp. PCC 7105         | Bacteria,Cyanobacteria,Oscillatoriophycideae,Oscillatoriales,Geitlerinema,Geitlerinema sp. PCC 7105                                                 |

|           |     |    |                |                                  |                                                                                                                                                          |
|-----------|-----|----|----------------|----------------------------------|----------------------------------------------------------------------------------------------------------------------------------------------------------|
| 516258864 | 382 | 37 | Cyanobacteria  | Geitlerinema sp. PCC 7105        | Bacteria,Cyanobacteria,Oscillatorioophycid eae,Oscillatoriales,Geitlerinema,Geitlerine ma sp. PCC 7105                                                   |
| 516255175 | 382 | 37 | Cyanobacteria  | Geitlerinema sp. PCC 7105        | Bacteria,Cyanobacteria,Oscillatorioophycid eae,Oscillatoriales,Geitlerinema,Geitlerine ma sp. PCC 7105                                                   |
| 516255773 | 384 | 37 | Cyanobacteria  | Geitlerinema sp. PCC 7105        | Bacteria,Cyanobacteria,Oscillatorioophycid eae,Oscillatoriales,Geitlerinema,Geitlerine ma sp. PCC 7105                                                   |
| 302859443 | 283 | 38 | Proteobacteria | Burkholderiales bacterium 1_1_47 | Bacteria,Proteobacteria,Betaproteobacteria,Burkholderiales,unclassified Burkholderiales Burkholderiales (miscellaneous),Burkholderiales bacterium 1_1_47 |
| 302860852 | 289 | 38 | Proteobacteria | Burkholderiales bacterium 1_1_47 | Bacteria,Proteobacteria,Betaproteobacteria,Burkholderiales,unclassified Burkholderiales Burkholderiales (miscellaneous),Burkholderiales bacterium 1_1_47 |
| 748637811 | 289 | 38 | Proteobacteria | Burkholderiales bacterium 1_1_47 | Bacteria,Proteobacteria,Betaproteobacteria,Burkholderiales,unclassified Burkholderiales Burkholderiales (miscellaneous),Burkholderiales bacterium 1_1_47 |
| 914924593 | 290 | 38 | Proteobacteria | Burkholderiales bacterium 1_1_47 | Bacteria,Proteobacteria,Betaproteobacteria,Burkholderiales,unclassified Burkholderiales Burkholderiales (miscellaneous),Burkholderiales bacterium 1_1_47 |
| 919167262 | 226 | 39 | Euryarchaeota  | Methanosarcina lacustris         | Archaea,Euryarchaeota,Methanomicrobia, Methanosarcinales,Methanosarcinaceae, Methanosarcina,Methanosarcina lacustris                                     |
| 851247240 | 239 | 39 | Euryarchaeota  | Methanosarcina lacustris         | Archaea,Euryarchaeota,Methanomicrobia, Methanosarcinales,Methanosarcinaceae, Methanosarcina,Methanosarcina lacustris                                     |
| 919167320 | 255 | 39 | Euryarchaeota  | Methanosarcina lacustris         | Archaea,Euryarchaeota,Methanomicrobia, Methanosarcinales,Methanosarcinaceae, Methanosarcina,Methanosarcina lacustris                                     |
| 851265821 | 239 | 39 | Euryarchaeota  | Methanosarcina sp. 2.H.T.1A.3    | Archaea,Euryarchaeota,Methanomicrobia, Methanosarcinales,Methanosarcinaceae, Methanosarcina,Methanosarcina sp. 2.H.T.1A.3                                |
| 750682808 | 195 | 40 | Cyanobacteria  | Planktothrix                     | Bacteria,Cyanobacteria,Oscillatorioophycid eae,Oscillatoriales,Planktothrix                                                                              |
| 738948966 | 195 | 40 | Cyanobacteria  | Planktothrix mougeotii           | Bacteria,Cyanobacteria,Oscillatorioophycid eae,Oscillatoriales,Planktothrix,Planktothrix mougeotii                                                       |
| 763056272 | 195 | 40 | Cyanobacteria  | Planktothrix prolifica           | Bacteria,Cyanobacteria,Oscillatorioophycid eae,Oscillatoriales,Planktothrix,Planktothrix prolifica                                                       |
| 763054849 | 182 | 40 | Cyanobacteria  | Planktothrix rubescens           | Bacteria,Cyanobacteria,Oscillatorioophycid eae,Oscillatoriales,Planktothrix,Planktothrix rubescens                                                       |

|           |     |    |                |                                                   |                                                                                                                                                                                                                             |
|-----------|-----|----|----------------|---------------------------------------------------|-----------------------------------------------------------------------------------------------------------------------------------------------------------------------------------------------------------------------------|
| 493575083 | 138 | 41 | Cyanobacteria  | Gloeocapsa sp. PCC 73106                          | Bacteria,Cyanobacteria,Oscillatoriophyceae,Chroococcales,Gloeocapsa,Gloeocapsa sp. PCC 73106                                                                                                                                |
| 493575284 | 152 | 41 | Cyanobacteria  | Gloeocapsa sp. PCC 73106                          | Bacteria,Cyanobacteria,Oscillatoriophyceae,Chroococcales,Gloeocapsa,Gloeocapsa sp. PCC 73106                                                                                                                                |
| 493574247 | 155 | 41 | Cyanobacteria  | Gloeocapsa sp. PCC 73106                          | Bacteria,Cyanobacteria,Oscillatoriophyceae,Chroococcales,Gloeocapsa,Gloeocapsa sp. PCC 73106                                                                                                                                |
| 493574266 | 167 | 41 | Cyanobacteria  | Gloeocapsa sp. PCC 73106                          | Bacteria,Cyanobacteria,Oscillatoriophyceae,Chroococcales,Gloeocapsa,Gloeocapsa sp. PCC 73106                                                                                                                                |
| 500121981 | 464 | 42 | Proteobacteria | Polaromonas naphthalenivorans                     | Bacteria,Proteobacteria,Betaproteobacteria,Burkholderiales,Comamonadaceae,Polaromonas,Polaromonas naphthalenivorans                                                                                                         |
| 752729499 | 464 | 42 | Proteobacteria | Polaromonas naphthalenivorans                     | Bacteria,Proteobacteria,Betaproteobacteria,Burkholderiales,Comamonadaceae,Polaromonas,Polaromonas naphthalenivorans                                                                                                         |
| 120593573 | 481 | 42 | Proteobacteria | Polaromonas naphthalenivorans CJ2                 | Bacteria,Proteobacteria,Betaproteobacteria,Burkholderiales,Comamonadaceae,Polaromonas,Polaromonas naphthalenivorans,Polaromonas naphthalenivorans CJ2                                                                       |
| 506389042 | 471 | 43 | Firmicutes     | Caldicellulosiruptor bescii                       | Bacteria,Firmicutes,Clostridia,Thermoanaerobacterales,Thermoanaerobacterales Family III. Incertae Sedis,Caldicellulosiruptor,Caldicellulosiruptor bescii                                                                    |
| 506389071 | 471 | 43 | Firmicutes     | Caldicellulosiruptor bescii                       | Bacteria,Firmicutes,Clostridia,Thermoanaerobacterales,Thermoanaerobacterales Family III. Incertae Sedis,Caldicellulosiruptor,Caldicellulosiruptor bescii                                                                    |
| 503194714 | 471 | 43 | Firmicutes     | Caldicellulosiruptor kronotskyensis               | Bacteria,Firmicutes,Clostridia,Thermoanaerobacterales,Thermoanaerobacterales Family III. Incertae Sedis,Caldicellulosiruptor,Caldicellulosiruptor kronotskyensis                                                            |
| 736843511 | 437 | 44 | Firmicutes     | [Clostridium] cellulosi                           | Bacteria,Firmicutes,Clostridia,Clostridiales,Ruminococcaceae,Ruminiclostridium,[Clostridium] cellulosi                                                                                                                      |
| 753833833 | 437 | 44 | Firmicutes     | Thermoanaerobacterium thermosaccharolyticum       | Bacteria,Firmicutes,Clostridia,Thermoanaerobacterales,Thermoanaerobacterales Family III. Incertae Sedis,Thermoanaerobacterium,Thermoanaerobacterium thermosaccharolyticum                                                   |
| 433293862 | 470 | 44 | Firmicutes     | Thermoanaerobacterium thermosaccharolyticum M0795 | Bacteria,Firmicutes,Clostridia,Thermoanaerobacterales,Thermoanaerobacterales Family III. Incertae Sedis,Thermoanaerobacterium,Thermoanaerobacterium thermosaccharolyticum,Thermoanaerobacterium thermosaccharolyticum M0795 |
| 654919971 | 462 | 45 | Proteobacteria | Burkholderia sp. UYPR1.413                        | Bacteria,Proteobacteria,Betaproteobacteria,Burkholderiales,Burkholderiaceae,Burkholderia,Burkholderia sp. UYPR1.413                                                                                                         |

|           |     |    |                |                                                        |                                                                                                                                                                                           |
|-----------|-----|----|----------------|--------------------------------------------------------|-------------------------------------------------------------------------------------------------------------------------------------------------------------------------------------------|
| 494863071 | 462 | 45 | Proteobacteria | Burkholderia terrae                                    | Bacteria,Proteobacteria,Betaproteobacteria,Burkholderiales,Burkholderiaceae,Burkholderia,Burkholderia terrae                                                                              |
| 494862862 | 462 | 45 | Proteobacteria | Burkholderia terrae                                    | Bacteria,Proteobacteria,Betaproteobacteria,Burkholderiales,Burkholderiaceae,Burkholderia,Burkholderia terrae                                                                              |
| 753797603 | 434 | 46 | Actinobacteria | Nocardiosis dassonvillei                               | Bacteria,Actinobacteria,Actinobacteria,Streptosporangiales,Nocardiosaceae,Nocardiosis,Nocardiosis dassonvillei                                                                            |
| 296847451 | 459 | 46 | Actinobacteria | Nocardiosis dassonvillei subsp. dassonvillei DSM 43111 | Bacteria,Actinobacteria,Actinobacteria,Streptosporangiales,Nocardiosaceae,Nocardiosis,Nocardiosis dassonvillei subsp. dassonvillei,Nocardiosis dassonvillei subsp. dassonvillei DSM 43111 |
| 738643828 | 434 | 46 | Actinobacteria | Nocardiosis sp. CNS639                                 | Bacteria,Actinobacteria,Actinobacteria,Streptosporangiales,Nocardiosaceae,Nocardiosis,Nocardiosis sp. CNS639                                                                              |
| 550534946 | 450 | 47 | Firmicutes     | Peptoclostridium difficile                             | Bacteria,Firmicutes,Clostridia,Clostridiales,Peptostreptococcaceae,Peptoclostridium,Peptoclostridium difficile                                                                            |
| 497580664 | 450 | 47 | Firmicutes     | Peptoclostridium difficile                             | Bacteria,Firmicutes,Clostridia,Clostridiales,Peptostreptococcaceae,Peptoclostridium,Peptoclostridium difficile                                                                            |
| 545016077 | 451 | 47 | Firmicutes     | Peptoclostridium difficile                             | Bacteria,Firmicutes,Clostridia,Clostridiales,Peptostreptococcaceae,Peptoclostridium,Peptoclostridium difficile                                                                            |
| 746229982 | 450 | 48 | Firmicutes     | Clostridium botulinum                                  | Bacteria,Firmicutes,Clostridia,Clostridiales,Clostridiaceae,Clostridium,Clostridium botulinum                                                                                             |
| 80159829  | 450 | 48 | Viruses        | Clostridium phage c-st                                 | Viruses,dsDNA viruses, no RNA stage,Caudovirales,Myoviridae,unclassified Myoviridae,Clostridium phage c-st                                                                                |
| 738341286 | 427 | 49 | Proteobacteria | Methylobacter whittenburyi                             | Bacteria,Proteobacteria,Gammaproteobacteria,Methylococcales,Methylococcaceae,Methylobacter,Methylobacter whittenburyi                                                                     |
| 738340993 | 440 | 49 | Proteobacteria | Methylobacter whittenburyi                             | Bacteria,Proteobacteria,Gammaproteobacteria,Methylococcales,Methylococcaceae,Methylobacter,Methylobacter whittenburyi                                                                     |
| 738341565 | 450 | 49 | Proteobacteria | Methylobacter whittenburyi                             | Bacteria,Proteobacteria,Gammaproteobacteria,Methylococcales,Methylococcaceae,Methylobacter,Methylobacter whittenburyi                                                                     |
| 829063323 | 401 | 50 | Proteobacteria | Pseudomonas fluorescens                                | Bacteria,Proteobacteria,Gammaproteobacteria,Pseudomonadales,Pseudomonadaceae,Pseudomonas,Pseudomonas fluorescens group,Pseudomonas fluorescens                                            |
| 829063102 | 402 | 50 | Proteobacteria | Pseudomonas fluorescens                                | Bacteria,Proteobacteria,Gammaproteobacteria,Pseudomonadales,Pseudomonadaceae,Pseudomonas,Pseudomonas fluorescens group,Pseudomonas fluorescens                                            |
| 655196732 | 446 | 50 | Proteobacteria | Pseudomonas sp. Ant30-3                                | Bacteria,Proteobacteria,Gammaproteobacteria,Pseudomonadales,Pseudomonadaceae,Pseudomonas,Pseudomonas sp. Ant30-3                                                                          |

|           |     |    |                |                                         |                                                                                                                         |
|-----------|-----|----|----------------|-----------------------------------------|-------------------------------------------------------------------------------------------------------------------------|
| 815714495 | 436 | 51 | Proteobacteria | Burkholderia sp.<br>K4410.MGS-135       | Bacteria,Proteobacteria,Betaproteobacteria,Burkholderiales,Burkholderiaceae,Burkholderia,Burkholderia sp. K4410.MGS-135 |
| 512681223 | 442 | 51 | Proteobacteria | Sutterella<br>wadsworthensis            | Bacteria,Proteobacteria,Betaproteobacteria,Burkholderiales,Sutterellaceae,Sutterella,Sutterella wadsworthensis          |
| 491573834 | 442 | 51 | Proteobacteria | Sutterella<br>wadsworthensis            | Bacteria,Proteobacteria,Betaproteobacteria,Burkholderiales,Sutterellaceae,Sutterella,Sutterella wadsworthensis          |
| 495180193 | 438 | 52 | Chloroflexi    | Ktedonobacter<br>racemifer              | Bacteria,Chloroflexi,Ktedonobacteria,Ktedonobacterales,Ktedonobacteraceae,Ktedonobacter,Ktedonobacter racemifer         |
| 495197591 | 438 | 52 | Chloroflexi    | Ktedonobacter<br>racemifer              | Bacteria,Chloroflexi,Ktedonobacteria,Ktedonobacterales,Ktedonobacteraceae,Ktedonobacter,Ktedonobacter racemifer         |
| 495183374 | 438 | 52 | Chloroflexi    | Ktedonobacter<br>racemifer              | Bacteria,Chloroflexi,Ktedonobacteria,Ktedonobacterales,Ktedonobacteraceae,Ktedonobacter,Ktedonobacter racemifer         |
| 495616745 | 427 | 53 | Firmicutes     | Alicyclobacillus<br>acidocaldarius      | Bacteria,Firmicutes,Bacilli,Bacillales,Alicyclobacillaceae,Alicyclobacillus,Alicyclobacillus acidocaldarius             |
| 502515787 | 427 | 53 | Firmicutes     | Alicyclobacillus<br>acidocaldarius      | Bacteria,Firmicutes,Bacilli,Bacillales,Alicyclobacillaceae,Alicyclobacillus,Alicyclobacillus acidocaldarius             |
| 218238652 | 392 | 53 | Firmicutes     | Alicyclobacillus<br>acidocaldarius LAA1 | Bacteria,Firmicutes,Bacilli,Bacillales,Alicyclobacillaceae,Alicyclobacillus,Alicyclobacillus acidocaldarius,LAA1        |
| 502797744 | 427 | 54 | Proteobacteria | Nitrosococcus<br>halophilus             | Bacteria,Proteobacteria,Gammaproteobacteria,Chromatiales,Chromatiaceae,Nitrosococcus,Nitrosococcus halophilus           |
| 502797830 | 427 | 54 | Proteobacteria | Nitrosococcus<br>halophilus             | Bacteria,Proteobacteria,Gammaproteobacteria,Chromatiales,Chromatiaceae,Nitrosococcus,Nitrosococcus halophilus           |
| 851243218 | 427 | 55 | Euryarchaeota  | Methanosarcina<br>lacustris             | Archaea,Euryarchaeota,Methanomicrobia,Methanosarcinales,Methanosarcinaceae,Methanosarcina,Methanosarcina lacustris      |
| 851243168 | 427 | 55 | Euryarchaeota  | Methanosarcina<br>lacustris             | Archaea,Euryarchaeota,Methanomicrobia,Methanosarcinales,Methanosarcinaceae,Methanosarcina,Methanosarcina lacustris      |
| 851238757 | 427 | 55 | Euryarchaeota  | Methanosarcina<br>lacustris             | Archaea,Euryarchaeota,Methanomicrobia,Methanosarcinales,Methanosarcinaceae,Methanosarcina,Methanosarcina lacustris      |
| 829601212 | 424 | 56 | Firmicutes     | Enterococcus<br>cecorum                 | Bacteria,Firmicutes,Bacilli,Lactobacillales,Enterococcaceae,Enterococcus,Enterococcus cecorum                           |
| 829619121 | 424 | 56 | Firmicutes     | Enterococcus<br>cecorum                 | Bacteria,Firmicutes,Bacilli,Lactobacillales,Enterococcaceae,Enterococcus,Enterococcus cecorum                           |
| 829617565 | 424 | 56 | Firmicutes     | Enterococcus<br>cecorum                 | Bacteria,Firmicutes,Bacilli,Lactobacillales,Enterococcaceae,Enterococcus,Enterococcus cecorum                           |
| 491578877 | 415 | 57 | Proteobacteria | Sutterella<br>wadsworthensis            | Bacteria,Proteobacteria,Betaproteobacteria,Burkholderiales,Sutterellaceae,Sutterella,Sutterella wadsworthensis          |
| 740163595 | 415 | 57 | Proteobacteria | Sutterella<br>wadsworthensis            | Bacteria,Proteobacteria,Betaproteobacteria,Burkholderiales,Sutterellaceae,Sutterella,Sutterella wadsworthensis          |

|           |     |    |                |                                         |                                                                                                                                                     |
|-----------|-----|----|----------------|-----------------------------------------|-----------------------------------------------------------------------------------------------------------------------------------------------------|
| 404658355 | 421 | 57 | Proteobacteria | Sutterella wadsworthensis 2_1_59BFAA    | Bacteria,Proteobacteria,Betaproteobacteria,Burkholderiales,Sutterellaceae,Sutterella,Sutterella wadsworthensis,Sutterella wadsworthensis 2_1_59BFAA |
| 504783188 | 418 | 58 | Firmicutes     | Exiguobacterium antarcticum             | Bacteria,Firmicutes,Bacilli,Bacillales,Bacillales incertae sedis,Bacillales Family XII. Incertae Sedis,Exiguobacterium,Exiguobacterium antarcticum  |
| 652434556 | 418 | 58 | Firmicutes     | Exiguobacterium antarcticum             | Bacteria,Firmicutes,Bacilli,Bacillales,Bacillales incertae sedis,Bacillales Family XII. Incertae Sedis,Exiguobacterium,Exiguobacterium antarcticum  |
| 501338645 | 418 | 58 | Firmicutes     | Exiguobacterium sibiricum               | Bacteria,Cyanobacteria,Oscillatoriothymicola,Oscillatoriales,Coleofasciculus,Coleofasciculus sibiricum                                              |
| 763347204 | 386 | 59 | Cyanobacteria  | Coleofasciculus chthonoplastes          | Bacteria,Cyanobacteria,Oscillatoriothymicola,Oscillatoriales,Coleofasciculus,Coleofasciculus chthonoplastes                                         |
| 763349918 | 386 | 59 | Cyanobacteria  | Coleofasciculus chthonoplastes          | Bacteria,Cyanobacteria,Oscillatoriothymicola,Oscillatoriales,Coleofasciculus,Coleofasciculus chthonoplastes                                         |
| 196182137 | 355 | 59 | Cyanobacteria  | Coleofasciculus chthonoplastes PCC 7420 | Bacteria,Cyanobacteria,Oscillatoriothymicola,Oscillatoriales,Coleofasciculus,Coleofasciculus chthonoplastes,Coleofasciculus chthonoplastes PCC 7420 |
| 750140500 | 347 | 60 | Chloroflexi    | Ktedonobacter racemifer                 | Bacteria,Chloroflexi,Ktedonobacteria,Ktedonobacterales,Ktedonobacteraceae,Ktedonobacter,Ktedonobacter racemifer                                     |
| 918699177 | 371 | 60 | Chloroflexi    | Ktedonobacter racemifer                 | Bacteria,Chloroflexi,Ktedonobacteria,Ktedonobacterales,Ktedonobacteraceae,Ktedonobacter,Ktedonobacter racemifer                                     |
| 297552337 | 377 | 60 | Chloroflexi    | Ktedonobacter racemifer DSM 44963       | Bacteria,Chloroflexi,Ktedonobacteria,Ktedonobacterales,Ktedonobacteraceae,Ktedonobacter,Ktedonobacter racemifer DSM 44963                           |
| 516414495 | 359 | 61 | Cyanobacteria  | Nodularia spumigena                     | Bacteria,Cyanobacteria,Nostocales,Nostocaceae,Nodularia,Nodularia spumigena                                                                         |
| 585121494 | 337 | 61 | Cyanobacteria  | Nodularia spumigena CCY9414             | Bacteria,Cyanobacteria,Nostocales,Nostocaceae,Nodularia,Nodularia spumigena,Nodularia spumigena CCY9414                                             |
| 585123623 | 368 | 61 | Cyanobacteria  | Nodularia spumigena CCY9414             | Bacteria,Cyanobacteria,Nostocales,Nostocaceae,Nodularia,Nodularia spumigena,Nodularia spumigena CCY9414                                             |
| 918699864 | 354 | 62 | Chloroflexi    | Ktedonobacter racemifer                 | Bacteria,Chloroflexi,Ktedonobacteria,Ktedonobacterales,Ktedonobacteraceae,Ktedonobacter,Ktedonobacter racemifer                                     |
| 297554830 | 354 | 62 | Chloroflexi    | Ktedonobacter racemifer DSM 44963       | Bacteria,Chloroflexi,Ktedonobacteria,Ktedonobacterales,Ktedonobacteraceae,Ktedonobacter,Ktedonobacter racemifer DSM 44963                           |



|           |     |    |                |                                            |                                                                                                                                                                                                          |
|-----------|-----|----|----------------|--------------------------------------------|----------------------------------------------------------------------------------------------------------------------------------------------------------------------------------------------------------|
| 495465212 | 358 | 63 | Cyanobacteria  | Moorea producents                          | Bacteria,Cyanobacteria,Oscillatoriophycid eae,Oscillatoriales,Moorea,Moorea<br>19 producents                                                                                                             |
| 764922063 | 366 | 63 | Cyanobacteria  | Moorea producents                          | Bacteria,Cyanobacteria,Oscillatoriophycid eae,Oscillatoriales,Moorea,Moorea<br>19 producents                                                                                                             |
| 332353334 | 352 | 63 | Cyanobacteria  | Moorea producents 3L                       | Bacteria,Cyanobacteria,Oscillatoriophycid eae,Oscillatoriales,Moorea,Moorea<br>12 producents,Moorea producents 3L                                                                                        |
| 738948808 | 364 | 64 | Cyanobacteria  | Planktothrix                               | Bacteria,Cyanobacteria,Oscillatoriophycid eae,Oscillatoriales,Planktothrix<br>8 eae,Oscillatoriales,Planktothrix                                                                                         |
| 738948126 | 364 | 64 | Cyanobacteria  | Planktothrix                               | Bacteria,Cyanobacteria,Oscillatoriophycid eae,Oscillatoriales,Planktothrix<br>8 eae,Oscillatoriales,Planktothrix                                                                                         |
| 750682874 | 365 | 64 | Cyanobacteria  | Planktothrix agardhii                      | Bacteria,Cyanobacteria,Oscillatoriophycid eae,Oscillatoriales,Planktothrix,Planktothrix agardhii<br>2 ix agardhii                                                                                        |
| 750138734 | 309 | 65 | Chloroflexi    | Ktedonobacter racemifer                    | Bacteria,Chloroflexi,Ktedonobacteria,Ktedonobacteriales,Ktedonobacteraceae,Ktedonobacter,Ktedonobacter racemifer<br>52 nobacter,Ktedonobacter racemifer                                                  |
| 750143836 | 309 | 65 | Chloroflexi    | Ktedonobacter racemifer                    | Bacteria,Chloroflexi,Ktedonobacteria,Ktedonobacteriales,Ktedonobacteraceae,Ktedonobacter,Ktedonobacter racemifer<br>52 nobacter,Ktedonobacter racemifer                                                  |
| 750143729 | 309 | 65 | Chloroflexi    | Ktedonobacter racemifer                    | Bacteria,Chloroflexi,Ktedonobacteria,Ktedonobacteriales,Ktedonobacteraceae,Ktedonobacter,Ktedonobacter racemifer<br>52 nobacter,Ktedonobacter racemifer                                                  |
| 655460771 | 284 | 66 | Thermotogae    | Pseudothermotoga elfii                     | Bacteria,Thermotogae,Thermotogae,Thermotogales,Thermotogaceae,Pseudothermotoga,Pseudothermotoga elfii<br>2 otoga,Pseudothermotoga elfii                                                                  |
| 908396443 | 272 | 66 | Thermotogae    | Pseudothermotoga lettingae                 | Bacteria,Thermotogae,Thermotogae,Thermotogales,Thermotogaceae,Pseudothermotoga,Pseudothermotoga lettingae<br>2 otoga,Pseudothermotoga lettingae                                                          |
| 157315178 | 302 | 66 | Thermotogae    | Pseudothermotoga lettingae TMO             | Bacteria,Thermotogae,Thermotogae,Thermotogales,Thermotogaceae,Pseudothermotoga,Pseudothermotoga lettingae,lettingae,Pseudothermotoga lettingae<br>2 TMO                                                  |
| 524002790 | 170 | 67 | Proteobacteria | Parasutterella excrementihominis CAG:233   | Bacteria,Proteobacteria,Betaproteobacteriales,Burkholderiales,Sutterellaceae,Parasutterella,environmental samples,Parasutterella excrementihominis CAG:233<br>2 CAG:233                                  |
| 329570285 | 185 | 67 | Proteobacteria | Parasutterella excrementihominis YIT 11859 | Bacteria,Proteobacteria,Betaproteobacteriales,Burkholderiales,Sutterellaceae,Parasutterella,Parasutterella excrementihominis,Parasutterella excrementihominis YIT 11859<br>6 excrementihominis YIT 11859 |
| 329574454 | 192 | 67 | Proteobacteria | Parasutterella excrementihominis YIT 11859 | Bacteria,Proteobacteria,Betaproteobacteriales,Burkholderiales,Sutterellaceae,Parasutterella,Parasutterella excrementihominis,Parasutterella excrementihominis YIT 11859<br>6 excrementihominis YIT 11859 |
| 852264045 | 62  | 68 | Cyanobacteria  | Crocospaera watsonii                       | Bacteria,Cyanobacteria,Oscillatoriophycid eae,Chroococcales,Crocospaera,Crocospaera watsonii<br>14 haera watsonii                                                                                        |
| 881034106 | 65  | 68 | Cyanobacteria  | Crocospaera watsonii                       | Bacteria,Cyanobacteria,Oscillatoriophycid eae,Chroococcales,Crocospaera,Crocospaera watsonii<br>14 haera watsonii                                                                                        |
| 357265126 | 56  | 68 | Cyanobacteria  | Crocospaera watsonii WH 0003               | Bacteria,Cyanobacteria,Oscillatoriophycid eae,Chroococcales,Crocospaera,Crocospaera watsonii,Crocospaera watsonii WH 0003<br>5 0003                                                                      |

|           |     |    |                |                                             |                                                                                                                                                                                                 |
|-----------|-----|----|----------------|---------------------------------------------|-------------------------------------------------------------------------------------------------------------------------------------------------------------------------------------------------|
| 737209489 | 483 | 69 | Proteobacteria | Acidithiobacillus ferrivorans               | Bacteria,Proteobacteria,Gammaproteobacteria,Acidithiobacillales,Acidithiobacillaceae,Acidithiobacillus,Acidithiobacillus ferrivorans                                                            |
| 669953820 | 532 | 69 | Proteobacteria | Acidithiobacillus ferrivorans               | Bacteria,Proteobacteria,Gammaproteobacteria,Acidithiobacillales,Acidithiobacillaceae,Acidithiobacillus,Acidithiobacillus ferrivorans                                                            |
| 750571318 | 449 | 70 | Proteobacteria | Thiorhodospira sibirica                     | Bacteria,Proteobacteria,Gammaproteobacteria,Chromatiales,Ectothiorhodospiraceae,Thiorhodospira,Thiorhodospira sibirica                                                                          |
| 349789229 | 474 | 70 | Proteobacteria | Thiorhodospira sibirica ATCC 700588         | Bacteria,Proteobacteria,Gammaproteobacteria,Chromatiales,Ectothiorhodospiraceae,Thiorhodospira,Thiorhodospira sibirica,Thiorhodospira sibirica ATCC 700588                                      |
| 763349759 | 428 | 71 | Cyanobacteria  | Coleofasciculus chthonoplastes              | Bacteria,Cyanobacteria,Oscillatoriophyceae,Oscillatoriales,Coleofasciculus,Coleofasciculus chthonoplastes                                                                                       |
| 196179674 | 471 | 71 | Cyanobacteria  | Coleofasciculus chthonoplastes PCC 7420     | Bacteria,Cyanobacteria,Oscillatoriophyceae,Oscillatoriales,Coleofasciculus,Coleofasciculus chthonoplastes,Coleofasciculus chthonoplastes PCC 7420                                               |
| 769143982 | 470 | 72 | Firmicutes     | Anaerostipes hadrus                         | Bacteria,Firmicutes,Clostridia,Clostridiales,Lachnospiraceae,Anaerostipes,Anaerostipes hadrus                                                                                                   |
| 763351214 | 445 | 73 | Cyanobacteria  | Coleofasciculus chthonoplastes              | Bacteria,Cyanobacteria,Oscillatoriophyceae,Oscillatoriales,Coleofasciculus,Coleofasciculus chthonoplastes                                                                                       |
| 196178243 | 468 | 73 | Cyanobacteria  | Coleofasciculus chthonoplastes PCC 7420     | Bacteria,Cyanobacteria,Oscillatoriophyceae,Oscillatoriales,Coleofasciculus,Coleofasciculus chthonoplastes,Coleofasciculus chthonoplastes PCC 7420                                               |
| 916890216 | 453 | 74 | Proteobacteria | Candidatus Contendobacter odensis           | Bacteria,Proteobacteria,Gammaproteobacteria,unclassified<br>Gammaproteobacteria,Competibacteraceae,Candidatus Contendobacter,Candidatus Contendobacter odensis                                  |
| 577004633 | 466 | 74 | Proteobacteria | Candidatus Contendobacter odensis Run_B_J11 | Bacteria,Proteobacteria,Gammaproteobacteria,unclassified<br>Gammaproteobacteria,Competibacteraceae,Candidatus Contendobacter,Candidatus Contendobacter odensis,Contendobacter odensis Run_B_J11 |
| 499805501 | 465 | 75 | Proteobacteria | Polaromonas sp. JS666                       | Bacteria,Proteobacteria,Betaproteobacteria,Burkholderiales,Comamonadaceae,Polaromonas,Polaromonas sp. JS666                                                                                     |
| 499805580 | 465 | 75 | Proteobacteria | Polaromonas sp. JS666                       | Bacteria,Proteobacteria,Betaproteobacteria,Burkholderiales,Comamonadaceae,Polaromonas,Polaromonas sp. JS666                                                                                     |
| 503547932 | 463 | 76 | Firmicutes     | Mahella australiensis                       | Bacteria,Firmicutes,Clostridia,Thermoanaerobacterales,Thermoanaerobacterales Family IV. Incertae Sedis,Mahella,Mahella australiensis                                                            |

|           |     |    |                |                                    |                                                                                                                                                                 |
|-----------|-----|----|----------------|------------------------------------|-----------------------------------------------------------------------------------------------------------------------------------------------------------------|
| 503548020 | 463 | 76 | Firmicutes     | Mahella australiensis              | Bacteria,Firmicutes,Clostridia,Thermoanaerobacterales,Thermoanaerobacterales Family IV. Incertae Sedis,Mahella,Mahella australiensis                            |
| 757645062 | 463 | 77 | Proteobacteria | Cupriavidus necator                | 3 Bacteria,Proteobacteria,Betaproteobacteria,Burkholderiales,Burkholderiaceae,Cupriavidus,Cupriavidus necator                                                   |
| 757647489 | 463 | 77 | Proteobacteria | Cupriavidus necator                | 2 Bacteria,Proteobacteria,Betaproteobacteria,Burkholderiales,Burkholderiaceae,Cupriavidus,Cupriavidus necator                                                   |
| 506219084 | 459 | 78 | Firmicutes     | Ammonifex degensii                 | 2 Bacteria,Firmicutes,Clostridia,Thermoanaerobacterales,Thermoanaerobacteraceae,Moorella group,Ammonifex,Ammonifex degensii                                     |
| 502569059 | 459 | 78 | Firmicutes     | Ammonifex degensii                 | 4 Bacteria,Firmicutes,Clostridia,Thermoanaerobacterales,Thermoanaerobacteraceae,Moorella group,Ammonifex,Ammonifex degensii                                     |
| 910241805 | 457 | 79 | Cyanobacteria  | Tolypothrix bouteillei             | 4 Bacteria,Cyanobacteria,Nostocales,Microchaetaceae,Tolypothrix,Tolypothrix bouteillei                                                                          |
| 516354009 | 457 | 79 | Cyanobacteria  | Scytonema hofmanni                 | 9 Bacteria,Cyanobacteria,Nostocales,Scytonemataceae,Scytonema,Scytonema hofmanni                                                                                |
| 737567486 | 443 | 80 | Proteobacteria | Halomonas sp. GFAJ-1               | 13 Bacteria,Proteobacteria,Gammaproteobacteria,Oceanospirillales,Halomonadaceae,Halomonas,Halomonas sp. GFAJ-1                                                  |
| 359298001 | 456 | 80 | Proteobacteria | Halomonas sp. GFAJ-1               | 2 Bacteria,Proteobacteria,Gammaproteobacteria,Oceanospirillales,Halomonadaceae,Halomonas,Halomonas sp. GFAJ-1                                                   |
| 495014271 | 456 | 81 | Proteobacteria | Burkholderia sp. BT03              | 2 Bacteria,Proteobacteria,Betaproteobacteria,Burkholderiales,Burkholderiaceae,Burkholderia,Burkholderia sp. BT03                                                |
| 494852515 | 456 | 81 | Proteobacteria | Burkholderia terrae                | 4 Bacteria,Proteobacteria,Betaproteobacteria,Burkholderiales,Burkholderiaceae,Burkholderia,Burkholderia terrae                                                  |
| 750139499 | 413 | 82 | Chloroflexi    | Ktedonobacter racemifer            | Bacteria,Chloroflexi,Ktedonobacteria,Ktedonobacterales,Ktedonobacteraceae,Ktedonobacter,Ktedonobacter racemifer                                                 |
| 297556617 | 455 | 82 | Chloroflexi    | Ktedonobacter racemifer DSM 44963  | 52 Bacteria,Chloroflexi,Ktedonobacteria,Ktedonobacterales,Ktedonobacteraceae,Ktedonobacter,Ktedonobacter racemifer,Ktedonobacter racemifer DSM 44963            |
| 564807354 | 454 | 83 | Firmicutes     | Lactobacillus equi                 | 15 Bacteria,Firmicutes,Bacilli,Lactobacillales,Lactobacillaceae,Lactobacillus,Lactobacillus equi                                                                |
| 640591377 | 454 | 83 | Firmicutes     | Lactobacillus equi                 | 6 Bacteria,Firmicutes,Bacilli,Lactobacillales,Lactobacillaceae,Lactobacillus,Lactobacillus equi                                                                 |
| 759968300 | 451 | 84 | Actinobacteria | Streptosporangium roseum           | 6 Bacteria,Actinobacteria,Actinobacteria,Streptosporangiales,Streptosporangiaceae,Streptosporangium,Streptosporangium roseum                                    |
| 270508069 | 422 | 84 | Actinobacteria | Streptosporangium roseum DSM 43021 | 3 Bacteria,Actinobacteria,Actinobacteria,Streptosporangiales,Streptosporangiaceae,Streptosporangium,Streptosporangium roseum,Streptosporangium roseum DSM 43021 |

|           |     |    |                    |                                               |                                                                                                                                                                                       |
|-----------|-----|----|--------------------|-----------------------------------------------|---------------------------------------------------------------------------------------------------------------------------------------------------------------------------------------|
| 771679752 | 436 | 85 | Proteobacteria     | Burkholderiaceae<br>bacterium 16              | Bacteria,Proteobacteria,Betaproteobacteria,Burkholderiales,Burkholderiaceae,unclassified Burkholderiaceae,Burkholderiaceae<br>2 bacterium 16                                          |
| 919130721 | 449 | 85 | Proteobacteria     | Burkholderiaceae<br>bacterium 16              | Bacteria,Proteobacteria,Betaproteobacteria,Burkholderiales,Burkholderiaceae,unclassified Burkholderiaceae,Burkholderiaceae<br>2 bacterium 16                                          |
| 825931341 | 433 | 86 | Firmicutes         | Aneurinibacillus<br>tyrosinisolvans           | Bacteria,Firmicutes,Bacilli,Bacillales,Paenibacillaceae,Aneurinibacillus<br>group,Aneurinibacillus,Aneurinibacillus<br>5 tyrosinisolvans                                              |
| 825903244 | 448 | 86 | Firmicutes         | Aneurinibacillus<br>tyrosinisolvans           | Bacteria,Firmicutes,Bacilli,Bacillales,Paenibacillaceae,Aneurinibacillus<br>group,Aneurinibacillus,Aneurinibacillus<br>5 tyrosinisolvans                                              |
| 763351071 | 426 | 87 | Cyanobacteria      | Coleofasciculus<br>chthonoplastes             | Bacteria,Cyanobacteria,Oscillatoriothycidae,Oscillatoriales,Coleofasciculus,Coleofasciculus chthonoplastes<br>25 sciculus chthonoplastes                                              |
| 196178332 | 444 | 87 | Cyanobacteria      | Coleofasciculus<br>chthonoplastes PCC<br>7420 | Bacteria,Cyanobacteria,Oscillatoriothycidae,Oscillatoriales,Coleofasciculus,Coleofasciculus chthonoplastes,Coleofasciculus<br>16 chthonoplastes PCC 7420                              |
| 750171232 | 434 | 88 | Proteobacteria     | Halomonas jeotgali                            | Bacteria,Proteobacteria,Gammaproteobacteria,Oceanospirillales,Halomonadaceae,H<br>2 alomonas,Halomonas jeotgali                                                                       |
| 648414493 | 443 | 88 | Proteobacteria     | Halomonas jeotgali                            | Bacteria,Proteobacteria,Gammaproteobacteria,Oceanospirillales,Halomonadaceae,H<br>2 alomonas,Halomonas jeotgali                                                                       |
| 753813890 | 443 | 89 | Fibrobacteres/Acic | Chloracidobacterium<br>thermophilum           | Bacteria,Fibrobacteres/Acidobacteria<br>group,Acidobacteria,unclassified<br>Acidobacteria,Acidobacteria subdivision<br>4,Chloracidobacterium,Chloracidobacteriu<br>1 m thermophilum   |
| 347587148 | 430 | 89 | Fibrobacteres/Acic | Chloracidobacterium<br>thermophilum B         | Bacteria,Fibrobacteres/Acidobacteria<br>group,Acidobacteria,unclassified<br>Acidobacteria,Acidobacteria subdivision<br>4,Chloracidobacterium,Chloracidobacteriu<br>2 m thermophilum B |
| 749999474 | 419 | 90 | Firmicutes         | Anaerostipes hadrus                           | Bacteria,Firmicutes,Clostridia,Clostridiales<br>,Lachnospiraceae,Anaerostipes,Anaerostip<br>6 es hadrus                                                                               |
| 429177907 | 442 | 90 | Firmicutes         | Anaerostipes hadrus<br>DSM 3319               | Bacteria,Firmicutes,Clostridia,Clostridiales<br>,Lachnospiraceae,Anaerostipes,Anaerostip<br>1 es hadrus,Anaerostipes hadrus DSM 3319                                                  |
| 807125388 | 420 | 91 | Actinobacteria     | Streptomyces sp.<br>WM6386                    | Bacteria,Actinobacteria,Actinobacteria,Str<br>eptomycetales,Streptomycetaceae,Strept<br>2 omyces,Streptomyces sp. WM6386                                                              |
| 808101633 | 442 | 91 | Actinobacteria     | Streptomyces sp.<br>WM6386                    | Bacteria,Actinobacteria,Actinobacteria,Str<br>eptomycetales,Streptomycetaceae,Strept<br>2 omyces,Streptomyces sp. WM6386                                                              |
| 490089111 | 420 | 92 | Actinobacteria     | Streptomyces<br>viridochromogenes             | Bacteria,Actinobacteria,Actinobacteria,Str<br>eptomycetales,Streptomycetaceae,Strept<br>2 omyces,Streptomyces viridochromogenes                                                       |

|           |     |     |                |                                   |                                                                                                                                                         |
|-----------|-----|-----|----------------|-----------------------------------|---------------------------------------------------------------------------------------------------------------------------------------------------------|
| 918018082 | 442 | 92  | Actinobacteria | Streptomyces viridochromogenes    | Bacteria,Actinobacteria,Actinobacteria,Streptomycetales,Streptomycetaceae,Streptomyces,Streptomyces viridochromogenes                                   |
| 728895995 | 440 | 93  | Thermotogae    | Fervidobacterium islandicum       | Bacteria,Thermotogae,Thermotogae,Thermotogales,Fervidobacteriaceae,Fervidobacterium,Fervidobacterium islandicum                                         |
| 701166555 | 440 | 93  | Thermotogae    | Fervidobacterium islandicum       | Bacteria,Thermotogae,Thermotogae,Thermotogales,Fervidobacteriaceae,Fervidobacterium,Fervidobacterium islandicum                                         |
| 636809000 | 439 | 94  | Proteobacteria | Desulfotignum balticum            | Bacteria,Proteobacteria,delta/epsilon subdivisions,Deltaproteobacteria,Desulfobacterales,Desulfobacteraceae,Desulfotignum,Desulfotignum balticum        |
| 748753481 | 439 | 94  | Proteobacteria | Desulfotignum phosphitoxidans     | Bacteria,Proteobacteria,delta/epsilon subdivisions,Deltaproteobacteria,Desulfobacterales,Desulfobacteraceae,Desulfotignum,Desulfotignum phosphitoxidans |
| 495179088 | 438 | 95  | Chloroflexi    | Ktedonobacter racemifer           | Bacteria,Chloroflexi,Ktedonobacteria,Ktedonobacterales,Ktedonobacteraceae,Ktedonobacter,Ktedonobacter racemifer                                         |
| 495195117 | 438 | 95  | Chloroflexi    | Ktedonobacter racemifer           | Bacteria,Chloroflexi,Ktedonobacteria,Ktedonobacterales,Ktedonobacteraceae,Ktedonobacter,Ktedonobacter racemifer                                         |
| 502958892 | 438 | 96  | Euryarchaeota  | Methanohalobium evestigatum       | Archaea,Euryarchaeota,Methanomicrobia,Methanosarcinales,Methanosarcinaceae,Methanohalobium,Methanohalobium evestigatum                                  |
| 502959717 | 438 | 96  | Euryarchaeota  | Methanohalobium evestigatum       | Archaea,Euryarchaeota,Methanomicrobia,Methanosarcinales,Methanosarcinaceae,Methanohalobium,Methanohalobium evestigatum                                  |
| 759742382 | 416 | 97  | Actinobacteria | Streptomyces fulvoviolaceus       | Bacteria,Actinobacteria,Actinobacteria,Streptomycetales,Streptomycetaceae,Streptomyces,Streptomyces fulvoviolaceus                                      |
| 918372180 | 438 | 97  | Actinobacteria | Streptomyces fulvoviolaceus       | Bacteria,Actinobacteria,Actinobacteria,Streptomycetales,Streptomycetaceae,Streptomyces,Streptomyces fulvoviolaceus                                      |
| 750144026 | 416 | 98  | Chloroflexi    | Ktedonobacter racemifer           | Bacteria,Chloroflexi,Ktedonobacteria,Ktedonobacterales,Ktedonobacteraceae,Ktedonobacter,Ktedonobacter racemifer                                         |
| 297548145 | 437 | 98  | Chloroflexi    | Ktedonobacter racemifer DSM 44963 | Bacteria,Chloroflexi,Ktedonobacteria,Ktedonobacterales,Ktedonobacteraceae,Ktedonobacter,Ktedonobacter racemifer DSM 44963                               |
| 916314723 | 425 | 99  | Actinobacteria | Nocardiopsis ganjiahuensis        | Bacteria,Actinobacteria,Actinobacteria,Streptosporangiales,Nocardiopsaceae,Nocardiopsis,Nocardiopsis ganjiahuensis                                      |
| 516166536 | 436 | 99  | Actinobacteria | Nocardiopsis ganjiahuensis        | Bacteria,Actinobacteria,Actinobacteria,Streptosporangiales,Nocardiopsaceae,Nocardiopsis,Nocardiopsis ganjiahuensis                                      |
| 665590333 | 435 | 100 | Actinobacteria | Streptosporangium roseum          | Bacteria,Actinobacteria,Actinobacteria,Streptosporangiales,Streptosporangiaceae,Streptosporangium,Streptosporangium roseum                              |

|           |     |     |                |                                   |                                                                                                                                                                  |
|-----------|-----|-----|----------------|-----------------------------------|------------------------------------------------------------------------------------------------------------------------------------------------------------------|
| 502652377 | 435 | 100 | Actinobacteria | Streptosporangium roseum          | Bacteria,Actinobacteria,Actinobacteria,Streptosporangiales,Streptosporangiaceae,Streptosporangium,Streptosporangium<br>3 roseum                                  |
| 750139029 | 394 | 101 | Chloroflexi    | Ktedonobacter racemifer           | Bacteria,Chloroflexi,Ktedonobacteria,Ktedonobacterales,Ktedonobacteraceae,Ktedonobacter,Ktedonobacter racemifer<br>52 nobacter,Ktedonobacter racemifer           |
| 297555563 | 433 | 101 | Chloroflexi    | Ktedonobacter racemifer DSM 44963 | Bacteria,Chloroflexi,Ktedonobacteria,Ktedonobacterales,Ktedonobacteraceae,Ktedonobacter,Ktedonobacter racemifer DSM 44963<br>15 44963                            |
| 918699346 | 430 | 102 | Chloroflexi    | Ktedonobacter racemifer           | Bacteria,Chloroflexi,Ktedonobacteria,Ktedonobacterales,Ktedonobacteraceae,Ktedonobacter,Ktedonobacter racemifer<br>52 nobacter,Ktedonobacter racemifer           |
| 495185044 | 432 | 102 | Chloroflexi    | Ktedonobacter racemifer           | Bacteria,Chloroflexi,Ktedonobacteria,Ktedonobacterales,Ktedonobacteraceae,Ktedonobacter,Ktedonobacter racemifer<br>52 nobacter,Ktedonobacter racemifer           |
| 495195481 | 432 | 103 | Chloroflexi    | Ktedonobacter racemifer           | Bacteria,Chloroflexi,Ktedonobacteria,Ktedonobacterales,Ktedonobacteraceae,Ktedonobacter,Ktedonobacter racemifer<br>52 nobacter,Ktedonobacter racemifer           |
| 495194584 | 432 | 103 | Chloroflexi    | Ktedonobacter racemifer           | Bacteria,Chloroflexi,Ktedonobacteria,Ktedonobacterales,Ktedonobacteraceae,Ktedonobacter,Ktedonobacter racemifer<br>52 nobacter,Ktedonobacter racemifer           |
| 503945474 | 432 | 104 | Actinobacteria | Streptomyces bingchenggensis      | Bacteria,Actinobacteria,Actinobacteria,Streptomycetales,Streptomycetaceae,Streptomyces,Streptomyces bingchenggensis<br>3 omyces,Streptomyces bingchenggensis     |
| 503945237 | 432 | 104 | Actinobacteria | Streptomyces bingchenggensis      | Bacteria,Actinobacteria,Actinobacteria,Streptomycetales,Streptomycetaceae,Streptomyces,Streptomyces bingchenggensis<br>3 omyces,Streptomyces bingchenggensis     |
| 851241801 | 432 | 105 | Euryarchaeota  | Methanosarcina lacustris          | Archaea,Euryarchaeota,Methanomicrobia,Methanosarcinales,Methanosarcinaceae,Methanosarcina,Methanosarcina lacustris<br>60 Methanosarcina,Methanosarcina lacustris |
| 851246091 | 432 | 105 | Euryarchaeota  | Methanosarcina lacustris          | Archaea,Euryarchaeota,Methanomicrobia,Methanosarcinales,Methanosarcinaceae,Methanosarcina,Methanosarcina lacustris<br>60 Methanosarcina,Methanosarcina lacustris |
| 669952828 | 430 | 106 | Proteobacteria | Acidithiobacillus ferrivorans     | Bacteria,Proteobacteria,Gammaproteobacteria,Acidithiobacillales,Acidithiobacillaceae,Acidithiobacillus,Acidithiobacillus ferrivorans<br>11 ferrivorans           |
| 737210774 | 431 | 106 | Proteobacteria | Acidithiobacillus ferrivorans     | Bacteria,Proteobacteria,Gammaproteobacteria,Acidithiobacillales,Acidithiobacillaceae,Acidithiobacillus,Acidithiobacillus ferrivorans<br>11 ferrivorans           |
| 738341504 | 413 | 107 | Proteobacteria | Methylobacter whittenburyi        | Bacteria,Proteobacteria,Gammaproteobacteria,Methylococcales,Methylococcaceae,Methylobacter,Methylobacter whittenburyi<br>5 whittenburyi                          |
| 738341074 | 431 | 107 | Proteobacteria | Methylobacter whittenburyi        | Bacteria,Proteobacteria,Gammaproteobacteria,Methylococcales,Methylococcaceae,Methylobacter,Methylobacter whittenburyi<br>5 whittenburyi                          |
| 505030549 | 427 | 108 | Cyanobacteria  | Anabaena cylindrica               | Bacteria,Cyanobacteria,Nostocales,Nostocaceae,Anabaena,Anabaena cylindrica<br>1 aceae,Anabaena,Anabaena cylindrica                                               |
| 746138950 | 431 | 108 | Cyanobacteria  | Aphanizomenon flos-aquae          | Bacteria,Cyanobacteria,Nostocales,Nostocaceae,Aphanizomenon,Aphanizomenon flos-aquae<br>4 flos-aquae                                                             |

|           |     |     |                |                                               |                                                                                                                                                                                     |
|-----------|-----|-----|----------------|-----------------------------------------------|-------------------------------------------------------------------------------------------------------------------------------------------------------------------------------------|
| 119457943 | 410 | 109 | Cyanobacteria  | Lyngbya sp. PCC 8106                          | Bacteria,Cyanobacteria,Oscillatoriophycid eae,Oscillatoriales,Lyngbya,Lyngbya sp.<br>3 PCC 8106                                                                                     |
| 748637106 | 431 | 109 | Cyanobacteria  | Lyngbya sp. PCC 8106                          | Bacteria,Cyanobacteria,Oscillatoriophycid eae,Oscillatoriales,Lyngbya,Lyngbya sp.<br>3 PCC 8106                                                                                     |
| 835374448 | 428 | 110 | Firmicutes     | Peptococcaceae<br>bacterium CEB3              | Bacteria,Firmicutes,Clostridia,Clostridiales ,Peptococcaceae,unclassified<br>Peptococcaceae,Peptococcaceae<br>3 bacterium CEB3                                                      |
| 836679806 | 431 | 110 | Firmicutes     | Peptococcaceae<br>bacterium CEB3              | Bacteria,Firmicutes,Clostridia,Clostridiales ,Peptococcaceae,unclassified<br>Peptococcaceae,Peptococcaceae<br>3 bacterium CEB3                                                      |
| 495180525 | 429 | 111 | Chloroflexi    | Ktedonobacter<br>racemifer                    | Bacteria,Chloroflexi,Ktedonobacteria,Kted onobacterales,Ktedonobacteraceae,Ktedo nobacter,Ktedonobacter racemifer<br>52 nobacter,Ktedonobacter racemifer                            |
| 495188438 | 429 | 111 | Chloroflexi    | Ktedonobacter<br>racemifer                    | Bacteria,Chloroflexi,Ktedonobacteria,Kted onobacterales,Ktedonobacteraceae,Ktedo nobacter,Ktedonobacter racemifer<br>52 nobacter,Ktedonobacter racemifer                            |
| 495183321 | 429 | 112 | Chloroflexi    | Ktedonobacter<br>racemifer                    | Bacteria,Chloroflexi,Ktedonobacteria,Kted onobacterales,Ktedonobacteraceae,Ktedo nobacter,Ktedonobacter racemifer<br>52 nobacter,Ktedonobacter racemifer                            |
| 495182844 | 429 | 112 | Chloroflexi    | Ktedonobacter<br>racemifer                    | Bacteria,Chloroflexi,Ktedonobacteria,Kted onobacterales,Ktedonobacteraceae,Ktedo nobacter,Ktedonobacter racemifer<br>52 nobacter,Ktedonobacter racemifer                            |
| 763346502 | 396 | 113 | Cyanobacteria  | Coleofasciculus<br>chthonoplastes             | Bacteria,Cyanobacteria,Oscillatoriophycid eae,Oscillatoriales,Coleofasciculus,Coleofa sciculus chthonoplastes<br>25 sciculus chthonoplastes                                         |
| 196182912 | 428 | 113 | Cyanobacteria  | Coleofasciculus<br>chthonoplastes PCC<br>7420 | Bacteria,Cyanobacteria,Oscillatoriophycid eae,Oscillatoriales,Coleofasciculus,Coleofa sciculus chthonoplastes,Coleofasciculus chthonoplastes PCC 7420<br>16 chthonoplastes PCC 7420 |
| 510930751 | 427 | 114 | Firmicutes     | Enterococcus<br>cecorum                       | Bacteria,Firmicutes,Bacilli,Lactobacillales, Enterococcaceae,Enterococcus,Enterococc us cecorum<br>6 us cecorum                                                                     |
| 510929983 | 428 | 114 | Firmicutes     | Enterococcus<br>cecorum                       | Bacteria,Firmicutes,Bacilli,Lactobacillales, Enterococcaceae,Enterococcus,Enterococc us cecorum<br>6 us cecorum                                                                     |
| 502797459 | 427 | 115 | Proteobacteria | Nitrosococcus<br>halophilus                   | Bacteria,Proteobacteria,Gammaproteobac teria,Chromatiales,Chromatiaceae,Nitroso coccus,Nitrosococcus halophilus<br>7 coccus,Nitrosococcus halophilus                                |
| 502796854 | 427 | 115 | Proteobacteria | Nitrosococcus<br>halophilus                   | Bacteria,Proteobacteria,Gammaproteobac teria,Chromatiales,Chromatiaceae,Nitroso coccus,Nitrosococcus halophilus<br>7 coccus,Nitrosococcus halophilus                                |
| 515519056 | 427 | 116 | Cyanobacteria  | Anabaena sp. PCC 7108                         | Bacteria,Cyanobacteria,Nostocales,Nostoc aceae,Anabaena,Anabaena sp. PCC 7108<br>2 aceae,Anabaena,Anabaena sp. PCC 7108                                                             |
| 746136581 | 427 | 116 | Cyanobacteria  | Aphanizomenon flos-<br>aquae                  | Bacteria,Cyanobacteria,Nostocales,Nostoc aceae,Aphanizomenon,Aphanizomenon flos-aquae<br>4 flos-aquae                                                                               |
| 763349672 | 427 | 117 | Cyanobacteria  | Coleofasciculus<br>chthonoplastes             | Bacteria,Cyanobacteria,Oscillatoriophycid eae,Oscillatoriales,Coleofasciculus,Coleofa sciculus chthonoplastes<br>25 sciculus chthonoplastes                                         |
| 196179772 | 386 | 117 | Cyanobacteria  | Coleofasciculus<br>chthonoplastes PCC<br>7420 | Bacteria,Cyanobacteria,Oscillatoriophycid eae,Oscillatoriales,Coleofasciculus,Coleofa sciculus chthonoplastes,Coleofasciculus chthonoplastes PCC 7420<br>16 chthonoplastes PCC 7420 |

|           |     |     |                |                                      |                                                                                                                                                                    |
|-----------|-----|-----|----------------|--------------------------------------|--------------------------------------------------------------------------------------------------------------------------------------------------------------------|
| 851315043 | 427 | 118 | Euryarchaeota  | Methanosarcina sp.<br>MTP4           | Archaea,Euryarchaeota,Methanomicrobia,<br>Methanosarcinales,Methanosarcinaceae,<br>Methanosarcina,Methanosarcina sp.<br>4 MTP4                                     |
| 851314722 | 427 | 118 | Euryarchaeota  | Methanosarcina sp.<br>MTP4           | Archaea,Euryarchaeota,Methanomicrobia,<br>Methanosarcinales,Methanosarcinaceae,<br>Methanosarcina,Methanosarcina sp.<br>4 MTP4                                     |
| 908629034 | 412 | 119 | Proteobacteria | Nitrosococcus watsonii               | Bacteria,Proteobacteria,Gammaproteobac<br>teria,Chromatiales,Chromatiaceae,Nitroso<br>1 coccus,Nitrosococcus watsonii                                              |
| 299540414 | 426 | 119 | Proteobacteria | Nitrosococcus watsonii C-<br>113     | Bacteria,Proteobacteria,Gammaproteobac<br>teria,Chromatiales,Chromatiaceae,Nitroso<br>coccus,Nitrosococcus<br>1 watsonii,Nitrosococcus watsonii C-113              |
| 497231916 | 425 | 120 | Cyanobacteria  | Cyanothece                           | Bacteria,Cyanobacteria,Oscillatoriohyphid<br>1 eae,Chroococcales,Cyanothece                                                                                        |
| 495553706 | 425 | 120 | Cyanobacteria  | Cyanothece sp. CCY0110               | Bacteria,Cyanobacteria,Oscillatoriohyphid<br>1 eae,Chroococcales,Cyanothece,Cyanothec<br>e sp. CCY0110                                                             |
| 498160676 | 425 | 121 | Cyanobacteria  | Acaryochloris sp. CCMEE<br>5410      | Bacteria,Cyanobacteria,Oscillatoriohyphid<br>4 eae,Chroococcales,Acaryochloris,Acaryoch<br>loris sp. CCMEE 5410                                                    |
| 498160623 | 425 | 121 | Cyanobacteria  | Acaryochloris sp. CCMEE<br>5410      | Bacteria,Cyanobacteria,Oscillatoriohyphid<br>4 eae,Chroococcales,Acaryochloris,Acaryoch<br>loris sp. CCMEE 5410                                                    |
| 797212860 | 425 | 122 | Cyanobacteria  | Tolypothrix sp. PCC 7601             | Bacteria,Cyanobacteria,Nostocales,Microc<br>haetaceae,Tolypothrix,Tolypothrix sp. PCC<br>1 7601                                                                    |
| 515883449 | 425 | 122 | Cyanobacteria  | Mastigocladopsis repens              | Bacteria,Cyanobacteria,Stigonematales,M<br>4 astigocladopsis,Mastigocladopsis repens                                                                               |
| 750139055 | 419 | 123 | Chloroflexi    | Ktedonobacter<br>racemifer           | Bacteria,Chloroflexi,Ktedonobacteria,Kted<br>onobacterales,Ktedonobacteraceae,Ktedo<br>52 nobacter,Ktedonobacter racemifer                                         |
| 297555630 | 421 | 123 | Chloroflexi    | Ktedonobacter<br>racemifer DSM 44963 | Bacteria,Chloroflexi,Ktedonobacteria,Kted<br>onobacterales,Ktedonobacteraceae,Ktedo<br>nobacter,Ktedonobacter<br>racemifer,Ktedonobacter racemifer DSM<br>15 44963 |
| 524087929 | 421 | 124 | Firmicutes     | Clostridium sp. CAG:678              | Bacteria,Firmicutes,Clostridia,Clostridiales<br>,Clostridiaceae,Clostridium,environmental<br>2 samples,Clostridium sp. CAG:678                                     |
| 524087941 | 421 | 124 | Firmicutes     | Clostridium sp. CAG:678              | Bacteria,Firmicutes,Clostridia,Clostridiales<br>,Clostridiaceae,Clostridium,environmental<br>2 samples,Clostridium sp. CAG:678                                     |
| 750139018 | 398 | 125 | Chloroflexi    | Ktedonobacter<br>racemifer           | Bacteria,Chloroflexi,Ktedonobacteria,Kted<br>onobacterales,Ktedonobacteraceae,Ktedo<br>52 nobacter,Ktedonobacter racemifer                                         |
| 297555535 | 419 | 125 | Chloroflexi    | Ktedonobacter<br>racemifer DSM 44963 | Bacteria,Chloroflexi,Ktedonobacteria,Kted<br>onobacterales,Ktedonobacteraceae,Ktedo<br>nobacter,Ktedonobacter<br>racemifer,Ktedonobacter racemifer DSM<br>15 44963 |
| 505140114 | 419 | 126 | Firmicutes     | Halobacteroides<br>halobius          | Bacteria,Firmicutes,Clostridia,Halanaerobi<br>ales,Halobacteroidaceae,Halobacteroides,<br>3 Halobacteroides halobius                                               |
| 507043497 | 415 | 127 | Firmicutes     | Bacillus                             | Bacteria,Firmicutes,Bacilli,Bacillales,Bacill<br>1 aceae,Bacillus                                                                                                  |



|           |     |     |               |                                                    |                                                                                                                                                                   |
|-----------|-----|-----|---------------|----------------------------------------------------|-------------------------------------------------------------------------------------------------------------------------------------------------------------------|
| 228768623 | 374 | 127 | Firmicutes    | Bacillus pseudomycoides<br>DSM 12442               | Bacteria,Firmicutes,Bacilli,Bacillales,Bacillaceae,Bacillus,Bacillus<br>pseudomycoides,Bacillus pseudomycoides<br>1 DSM 12442                                     |
| 769213283 | 400 | 128 | Firmicutes    | [Eubacterium]<br>cellulosolvens                    | Bacteria,Firmicutes,Clostridia,Clostridiales<br>,Eubacteriaceae,Eubacterium,[Eubacteriu<br>1 m] cellulosolvens                                                    |
| 389313404 | 412 | 128 | Firmicutes    | [Eubacterium]<br>cellulosolvens 6                  | Bacteria,Firmicutes,Clostridia,Clostridiales<br>,Eubacteriaceae,Eubacterium,[Eubacteriu<br>1 m] cellulosolvens,[Eubacterium]<br>1 cellulosolvens 6                |
| 752581329 | 397 | 129 | Firmicutes    | Finegoldia magna                                   | Bacteria,Firmicutes,Clostridia,Clostridiales<br>,Peptoniphilaceae,Finegoldia,Finegoldia<br>1 magna                                                                |
| 167832304 | 410 | 129 | Firmicutes    | Finegoldia magna ATCC<br>29328                     | Bacteria,Firmicutes,Clostridia,Clostridiales<br>,Peptoniphilaceae,Finegoldia,Finegoldia<br>1 magna,Finegoldia magna ATCC 29328                                    |
| 502959635 | 401 | 130 | Euryarchaeota | Methanohalobium<br>evestigatum                     | Archaea,Euryarchaeota,Methanomicrobia,<br>Methanosarcinales,Methanosarcinaceae,<br>Methanohalobium,Methanohalobium<br>5 evestigatum                               |
| 502959253 | 407 | 130 | Euryarchaeota | Methanohalobium<br>evestigatum                     | Archaea,Euryarchaeota,Methanomicrobia,<br>Methanosarcinales,Methanosarcinaceae,<br>Methanohalobium,Methanohalobium<br>5 evestigatum                               |
| 515872749 | 389 | 131 | Cyanobacteria | Spirulina subsalsa                                 | Bacteria,Cyanobacteria,Oscillatoriophycid<br>eae,Oscillatoriales,Spirulina,Spirulina<br>3 subsalsa                                                                |
| 515872123 | 406 | 131 | Cyanobacteria | Spirulina subsalsa                                 | Bacteria,Cyanobacteria,Oscillatoriophycid<br>eae,Oscillatoriales,Spirulina,Spirulina<br>3 subsalsa                                                                |
| 504040543 | 401 | 132 | Cyanobacteria | Arthrospira platensis                              | Bacteria,Cyanobacteria,Oscillatoriophycid<br>eae,Oscillatoriales,Arthrospira,Arthrospira<br>20 platensis                                                          |
| 504042800 | 401 | 132 | Cyanobacteria | Arthrospira platensis                              | Archaea,Euryarchaeota,Methanomicrobia,<br>Methanosarcinales,Methanosarcinaceae,<br>Methanosarcina,Methanosarcina<br>20 platensis                                  |
| 851273483 | 392 | 133 | Euryarchaeota | Methanosarcina<br>horonobensis                     | Archaea,Euryarchaeota,Methanomicrobia,<br>Methanosarcinales,Methanosarcinaceae,<br>Methanosarcina,Methanosarcina<br>3 horonobensis                                |
| 805382013 | 399 | 133 | Euryarchaeota | Methanosarcina<br>horonobensis HB-1 =<br>JCM 15518 | Archaea,Euryarchaeota,Methanomicrobia,<br>Methanosarcinales,Methanosarcinaceae,<br>Methanosarcina,Methanosarcina<br>2 horonobensis HB-1 = JCM 15518               |
| 763346534 | 372 | 134 | Cyanobacteria | Coleofasciculus<br>chthonoplastes                  | Bacteria,Cyanobacteria,Oscillatoriophycid<br>eae,Oscillatoriales,Coleofasciculus,Coleofa<br>25 sciculus chthonoplastes                                            |
| 493031181 | 396 | 134 | Cyanobacteria | Coleofasciculus<br>chthonoplastes                  | Bacteria,Cyanobacteria,Oscillatoriophycid<br>eae,Oscillatoriales,Coleofasciculus,Coleofa<br>25 sciculus chthonoplastes                                            |
| 763352824 | 395 | 135 | Cyanobacteria | Coleofasciculus<br>chthonoplastes                  | Bacteria,Cyanobacteria,Oscillatoriophycid<br>eae,Oscillatoriales,Coleofasciculus,Coleofa<br>25 sciculus chthonoplastes                                            |
| 196176410 | 381 | 135 | Cyanobacteria | Coleofasciculus<br>chthonoplastes PCC<br>7420      | Bacteria,Cyanobacteria,Oscillatoriophycid<br>eae,Oscillatoriales,Coleofasciculus,Coleofa<br>sciculus chthonoplastes,Coleofasciculus<br>16 chthonoplastes PCC 7420 |

|           |     |     |               |                                   |                                                                                                                                                   |
|-----------|-----|-----|---------------|-----------------------------------|---------------------------------------------------------------------------------------------------------------------------------------------------|
| 297555693 | 380 | 136 | Chloroflexi   | Ktedonobacter racemifer DSM 44963 | Bacteria,Chloroflexi,Ktedonobacteria,Ktedonobacterales,Ktedonobacteraceae,Ktedonobacter,Ktedonobacter racemifer,Ktedonobacter racemifer DSM 44963 |
| 297547678 | 392 | 136 | Chloroflexi   | Ktedonobacter racemifer DSM 44963 | Bacteria,Chloroflexi,Ktedonobacteria,Ktedonobacterales,Ktedonobacteraceae,Ktedonobacter,Ktedonobacter racemifer,Ktedonobacter racemifer DSM 44963 |
| 506219980 | 387 | 137 | Firmicutes    | Ammonifex degensii                | Bacteria,Firmicutes,Clostridia,Thermoanaerobacterales,Thermoanaerobacteraceae,Moorella group,Ammonifex,Ammonifex degensii                         |
| 506218806 | 388 | 137 | Firmicutes    | Ammonifex degensii                | Bacteria,Firmicutes,Clostridia,Thermoanaerobacterales,Thermoanaerobacteraceae,Moorella group,Ammonifex,Ammonifex degensii                         |
| 753958558 | 386 | 138 | Cyanobacteria | Acaryochloris marina              | Bacteria,Cyanobacteria,Oscillatoriophyceae,Chroococcales,Acaryochloris,Acaryochloris marina                                                       |
| 158310350 | 387 | 138 | Cyanobacteria | Acaryochloris marina MBIC11017    | Bacteria,Cyanobacteria,Oscillatoriophyceae,Chroococcales,Acaryochloris,Acaryochloris marina,Acaryochloris marina MBIC11017                        |
| 916320797 | 367 | 139 | Cyanobacteria | Microcoleus sp. PCC 7113          | Bacteria,Cyanobacteria,Oscillatoriophyceae,Oscillatoriales,Microcoleus,Microcoleus sp. PCC 7113                                                   |
| 428250446 | 384 | 139 | Cyanobacteria | Microcoleus sp. PCC 7113          | Bacteria,Cyanobacteria,Oscillatoriophyceae,Oscillatoriales,Microcoleus,Microcoleus sp. PCC 7113                                                   |
| 546224917 | 363 | 140 | Cyanobacteria | Crocospaera watsonii              | Bacteria,Cyanobacteria,Oscillatoriophyceae,Chroococcales,Crocospaera,Crocospaera watsonii                                                         |
| 852262173 | 381 | 140 | Cyanobacteria | Crocospaera watsonii              | Bacteria,Cyanobacteria,Oscillatoriophyceae,Chroococcales,Crocospaera,Crocospaera watsonii                                                         |
| 428255037 | 362 | 141 | Cyanobacteria | Microcoleus sp. PCC 7113          | Bacteria,Cyanobacteria,Oscillatoriophyceae,Oscillatoriales,Microcoleus,Microcoleus sp. PCC 7113                                                   |
| 754157869 | 376 | 141 | Cyanobacteria | Microcoleus sp. PCC 7113          | Bacteria,Cyanobacteria,Oscillatoriophyceae,Oscillatoriales,Microcoleus,Microcoleus sp. PCC 7113                                                   |
| 808795645 | 367 | 142 | Cyanobacteria | Limnoraphis robusta               | Bacteria,Cyanobacteria,Oscillatoriophyceae,Oscillatoriales,Limnoraphis,Limnoraphis robusta                                                        |
| 497470778 | 367 | 142 | Cyanobacteria | Lyngbya sp. PCC 8106              | Bacteria,Cyanobacteria,Oscillatoriophyceae,Oscillatoriales,Lyngbya,Lyngbya sp. PCC 8106                                                           |
| 503086269 | 365 | 143 | Cyanobacteria | Cyanothece sp. PCC 7822           | Bacteria,Cyanobacteria,Oscillatoriophyceae,Chroococcales,Cyanothece,Cyanothece sp. PCC 7822                                                       |
| 503086059 | 365 | 143 | Cyanobacteria | Cyanothece sp. PCC 7822           | Bacteria,Cyanobacteria,Oscillatoriophyceae,Chroococcales,Cyanothece,Cyanothece sp. PCC 7822                                                       |
| 196187591 | 360 | 144 | Cyanobacteria | Synechococcus sp. PCC 7335        | Bacteria,Cyanobacteria,Oscillatoriophyceae,Chroococcales,Synechococcus,Synechococcus sp. PCC 7335                                                 |
| 740177457 | 361 | 144 | Cyanobacteria | Synechococcus sp. PCC 7335        | Bacteria,Cyanobacteria,Oscillatoriophyceae,Chroococcales,Synechococcus,Synechococcus sp. PCC 7335                                                 |

|           |     |     |               |                                    |                                                                                                                                                    |
|-----------|-----|-----|---------------|------------------------------------|----------------------------------------------------------------------------------------------------------------------------------------------------|
| 764924346 | 360 | 145 | Cyanobacteria | Moorea producens                   | 19<br>Bacteria,Cyanobacteria,Oscillatoriohyphid eae,Oscillatoriales,Moorea,Moorea                                                                  |
| 332349483 | 349 | 145 | Cyanobacteria | Moorea producens 3L                | 12<br>Bacteria,Cyanobacteria,Oscillatoriohyphid eae,Oscillatoriales,Moorea,Moorea                                                                  |
| 493675647 | 346 | 146 | Cyanobacteria | Arthrospira                        | 7<br>Bacteria,Cyanobacteria,Oscillatoriohyphid eae,Oscillatoriales,Arthrospira                                                                     |
| 78499557  | 353 | 146 | Cyanobacteria | Arthrospira platensis              | 20<br>Bacteria,Cyanobacteria,Oscillatoriohyphid eae,Oscillatoriales,Arthrospira,Arthrospira                                                        |
| 655939361 | 339 | 147 | Firmicutes    | Thermicanus aegyptius              | 2<br>Bacteria,Firmicutes,Bacilli,Bacillales,Bacillales incertae sedis,Bacillales Family X. Incertae Sedis,Thermicanus,Thermicanus                  |
| 918099252 | 353 | 147 | Firmicutes    | Thermicanus aegyptius              | 2<br>Bacteria,Firmicutes,Bacilli,Bacillales,Bacillales incertae sedis,Bacillales Family X. Incertae Sedis,Thermicanus,Thermicanus                  |
| 753769621 | 343 | 148 | Firmicutes    | Pelotomaculum thermopropionicum    | 1<br>Bacteria,Firmicutes,Clostridia,Clostridiales ,Peptococcaceae,Pelotomaculum,Pelotomaculum thermopropionicum                                    |
| 146272595 | 347 | 148 | Firmicutes    | Pelotomaculum thermopropionicum SI | 1<br>Bacteria,Firmicutes,Clostridia,Clostridiales ,Peptococcaceae,Pelotomaculum,Pelotomaculum thermopropionicum,Pelotomaculum thermopropionicum SI |
| 753864852 | 335 | 149 | Cyanobacteria | Stanieria cyanosphaera             | 1<br>Bacteria,Cyanobacteria,Pleurocapsales,Stanieria,Stanieria cyanosphaera                                                                        |
| 428272038 | 344 | 149 | Cyanobacteria | Stanieria cyanosphaera PCC 7437    | 1<br>Bacteria,Cyanobacteria,Pleurocapsales,Stanieria,Stanieria cyanosphaera,Stanieria cyanosphaera PCC 7437                                        |
| 209492096 | 342 | 150 | Cyanobacteria | Arthrospira maxima CS-328          | 5<br>Bacteria,Cyanobacteria,Oscillatoriohyphid eae,Oscillatoriales,Arthrospira,Arthrospira maxima,Arthrospira maxima CS-328                        |
| 585308822 | 342 | 150 | Cyanobacteria | Arthrospira sp. PCC 8005           | 13<br>Bacteria,Cyanobacteria,Oscillatoriohyphid eae,Oscillatoriales,Arthrospira,Arthrospira sp. PCC 8005                                           |
| 493671064 | 337 | 151 | Cyanobacteria | Arthrospira                        | 7<br>Bacteria,Cyanobacteria,Oscillatoriohyphid eae,Oscillatoriales,Arthrospira                                                                     |
| 209494675 | 341 | 151 | Cyanobacteria | Arthrospira maxima CS-328          | 5<br>Bacteria,Cyanobacteria,Oscillatoriohyphid eae,Oscillatoriales,Arthrospira,Arthrospira maxima,Arthrospira maxima CS-328                        |
| 851319314 | 318 | 152 | Euryarchaeota | Methanosarcina sp. MTP4            | 4<br>Archaea,Euryarchaeota,Methanomicrobia, Methanosarcinales,Methanosarcinaceae, Methanosarcina,Methanosarcina sp.                                |
| 919162612 | 339 | 152 | Euryarchaeota | Methanosarcina sp. MTP4            | 4<br>Archaea,Euryarchaeota,Methanomicrobia, Methanosarcinales,Methanosarcinaceae, Methanosarcina,Methanosarcina sp.                                |
| 764922807 | 292 | 153 | Cyanobacteria | Moorea producens                   | 19<br>Bacteria,Cyanobacteria,Oscillatoriohyphid eae,Oscillatoriales,Moorea,Moorea                                                                  |
| 332352197 | 314 | 153 | Cyanobacteria | Moorea producens 3L                | 12<br>Bacteria,Cyanobacteria,Oscillatoriohyphid eae,Oscillatoriales,Moorea,Moorea                                                                  |

|           |     |     |                |                                             |                                                                                                                                                              |
|-----------|-----|-----|----------------|---------------------------------------------|--------------------------------------------------------------------------------------------------------------------------------------------------------------|
| 542056062 | 307 | 154 | Firmicutes     | Aneurinibacillus aneurinilyticus ATCC 12856 | Bacteria,Firmicutes,Bacilli,Bacillales,Paeni bacillaceae,Aneurinibacillus group,Aneurinibacillus aneurinilyticus,Aneurinibacillus aneurinilyticus ATCC 12856 |
| 917807473 | 307 | 154 | Firmicutes     | Aneurinibacillus migulanus                  | Bacteria,Firmicutes,Bacilli,Bacillales,Paeni bacillaceae,Aneurinibacillus group,Aneurinibacillus aneurinilyticus,Aneurinibacillus migulanus                  |
| 805377875 | 264 | 155 | Euryarchaeota  | Methanosarcina lacustris Z-7289             | Archaea,Euryarchaeota,Methanomicrobia, Methanosarcinales,Methanosarcinaceae, Methanosarcina,Methanosarcina lacustris,Methanosarcina lacustris Z-7289         |
| 805380095 | 287 | 155 | Euryarchaeota  | Methanosarcina lacustris Z-7289             | Archaea,Euryarchaeota,Methanomicrobia, Methanosarcinales,Methanosarcinaceae, Methanosarcina,Methanosarcina lacustris,Methanosarcina lacustris Z-7289         |
| 515489461 | 283 | 156 | Cyanobacteria  | Prochlorothrix hollandica                   | Bacteria,Cyanobacteria,Prochlorales,Prochlorothrixaceae,Prochlorothrix,Prochlorothrix hollandica                                                             |
| 817120015 | 286 | 156 | Cyanobacteria  | Prochlorothrix hollandica                   | Bacteria,Cyanobacteria,Prochlorales,Prochlorothrixaceae,Prochlorothrix,Prochlorothrix hollandica                                                             |
| 763349797 | 274 | 157 | Cyanobacteria  | Coleofasciculus chthonoplastes              | Bacteria,Cyanobacteria,Oscillatoriophycidae,Oscillatoriales,Coleofasciculus,Coleofasciculus chthonoplastes                                                   |
| 196179633 | 282 | 157 | Cyanobacteria  | Coleofasciculus chthonoplastes PCC 7420     | Bacteria,Cyanobacteria,Oscillatoriophycidae,Oscillatoriales,Coleofasciculus,Coleofasciculus chthonoplastes,Coleofasciculus chthonoplastes PCC 7420           |
| 432000681 | 248 | 158 | Firmicutes     | Anoxybacillus flavithermus TNO-09.006       | Bacteria,Firmicutes,Bacilli,Bacillales,Bacillaceae,Anoxybacillus,Anoxybacillus flavithermus,Anoxybacillus flavithermus TNO-09.006                            |
| 432000885 | 265 | 158 | Firmicutes     | Anoxybacillus flavithermus TNO-09.006       | Bacteria,Firmicutes,Bacilli,Bacillales,Bacillaceae,Anoxybacillus,Anoxybacillus flavithermus,Anoxybacillus flavithermus TNO-09.006                            |
| 765303279 | 244 | 159 | Proteobacteria | Halomonas meridiana                         | Bacteria,Proteobacteria,Gammaproteobacteria,Oceanospirillales,Halomonadaceae,Halomonas,Halomonas meridiana                                                   |
| 765303089 | 244 | 159 | Proteobacteria | Halomonas meridiana                         | Bacteria,Proteobacteria,Gammaproteobacteria,Oceanospirillales,Halomonadaceae,Halomonas,Halomonas meridiana                                                   |
| 917394967 | 232 | 160 | Cyanobacteria  | Lyngbya aestuarii                           | Bacteria,Cyanobacteria,Oscillatoriophycidae,Oscillatoriales,Lyngbya,Lyngbya aestuarii                                                                        |
| 550818364 | 238 | 160 | Cyanobacteria  | Lyngbya aestuarii BL J                      | Bacteria,Cyanobacteria,Oscillatoriophycidae,Oscillatoriales,Lyngbya,Lyngbya aestuarii, Lyngbya aestuarii BL J                                                |
| 119463775 | 213 | 161 | Cyanobacteria  | Nodularia spumigena CCY9414                 | Bacteria,Cyanobacteria,Nostocales,Nostocaceae,Nodularia,Nodularia spumigena,Nodularia spumigena CCY9414                                                      |
| 585120262 | 236 | 161 | Cyanobacteria  | Nodularia spumigena CCY9414                 | Bacteria,Cyanobacteria,Nostocales,Nostocaceae,Nodularia,Nodularia spumigena,Nodularia spumigena CCY9414                                                      |

|           |     |     |                |                                         |                                                                                                                                                   |
|-----------|-----|-----|----------------|-----------------------------------------|---------------------------------------------------------------------------------------------------------------------------------------------------|
| 493574041 | 211 | 162 | Cyanobacteria  | Gloeocapsa sp. PCC 73106                | Bacteria,Cyanobacteria,Oscillatoriophyceae,Chroococcales,Gloeocapsa,Gloeocapsa sp. PCC 73106                                                      |
| 493574162 | 229 | 162 | Cyanobacteria  | Gloeocapsa sp. PCC 73106                | Bacteria,Cyanobacteria,Oscillatoriophyceae,Chroococcales,Gloeocapsa,Gloeocapsa sp. PCC 73106                                                      |
| 564132583 | 221 | 163 | Firmicutes     | Youngiibacter fragilis 232.1            | Bacteria,Firmicutes,Clostridia,Clostridiales,Clostridiaceae,Youngiibacter,Youngiibacter fragilis,Youngiibacter fragilis 232.1                     |
| 564132560 | 222 | 163 | Firmicutes     | Youngiibacter fragilis 232.1            | Bacteria,Firmicutes,Clostridia,Clostridiales,Clostridiaceae,Youngiibacter,Youngiibacter fragilis,Youngiibacter fragilis 232.1                     |
| 763349321 | 221 | 164 | Cyanobacteria  | Coleofasciculus chthonoplastes          | Bacteria,Cyanobacteria,Oscillatoriophyceae,Oscillatoriales,Coleofasciculus,Coleofasciculus chthonoplastes                                         |
| 196180073 | 201 | 164 | Cyanobacteria  | Coleofasciculus chthonoplastes PCC 7420 | Bacteria,Cyanobacteria,Oscillatoriophyceae,Oscillatoriales,Coleofasciculus,Coleofasciculus chthonoplastes,Coleofasciculus chthonoplastes PCC 7420 |
| 119461580 | 190 | 165 | Cyanobacteria  | Nodularia spumigena CCY9414             | Bacteria,Cyanobacteria,Nostocales,Nostocaceae,Nodularia,Nodularia spumigena,Nodularia spumigena CCY9414                                           |
| 119461928 | 192 | 165 | Cyanobacteria  | Nodularia spumigena CCY9414             | Bacteria,Cyanobacteria,Nostocales,Nostocaceae,Nodularia,Nodularia spumigena,Nodularia spumigena CCY9414                                           |
| 918383514 | 173 | 166 | Proteobacteria | Pseudomonas aeruginosa                  | Bacteria,Proteobacteria,Gammaproteobacteria,Pseudomonadales,Pseudomonadaceae,Pseudomonas,Pseudomonas aeruginosa group,Pseudomonas aeruginosa      |
| 565901635 | 173 | 166 | Proteobacteria | Pseudomonas aeruginosa                  | Bacteria,Proteobacteria,Gammaproteobacteria,Pseudomonadales,Pseudomonadaceae,Pseudomonas,Pseudomonas aeruginosa group,Pseudomonas aeruginosa      |
| 516414460 | 170 | 167 | Cyanobacteria  | Nodularia spumigena                     | Bacteria,Cyanobacteria,Nostocales,Nostocaceae,Nodularia,Nodularia spumigena                                                                       |
| 119465516 | 172 | 167 | Cyanobacteria  | Nodularia spumigena CCY9414             | Bacteria,Cyanobacteria,Nostocales,Nostocaceae,Nodularia,Nodularia spumigena,Nodularia spumigena CCY9414                                           |
| 805337294 | 151 | 168 | Euryarchaeota  | Methanosarcina sp. WWM596               | Archaea,Euryarchaeota,Methanomicrobia,Methanosarcinales,Methanosarcinaceae,Methanosarcina,Methanosarcina sp. WWM596                               |
| 919167038 | 164 | 168 | Euryarchaeota  | Methanosarcina sp. WWM596               | Archaea,Euryarchaeota,Methanomicrobia,Methanosarcinales,Methanosarcinaceae,Methanosarcina,Methanosarcina sp. WWM596                               |
| 431999653 | 157 | 169 | Firmicutes     | Anoxybacillus flavithermus TNO-09.006   | Bacteria,Firmicutes,Bacilli,Bacillales,Bacillaceae,Anoxybacillus,Anoxybacillus flavithermus,Anoxybacillus flavithermus TNO-09.006                 |

|           |     |     |                |                                       |                                                                                                                                                    |
|-----------|-----|-----|----------------|---------------------------------------|----------------------------------------------------------------------------------------------------------------------------------------------------|
| 432001846 | 158 | 169 | Firmicutes     | Anoxybacillus flavithermus TNO-09.006 | Bacteria,Firmicutes,Bacilli,Bacillales,Bacillaceae,Anoxybacillus,Anoxybacillus flavithermus,Anoxybacillus flavithermus TNO-09.006                  |
| 488871377 | 137 | 170 | Cyanobacteria  | Microcystis aeruginosa                | Bacteria,Cyanobacteria,Oscillatoriophyceae,Chroococcales,Microcystis,Microcystis aeruginosa                                                        |
| 718249451 | 136 | 170 | Cyanobacteria  | Microcystis aeruginosa NIES-44        | Bacteria,Cyanobacteria,Oscillatoriophyceae,Chroococcales,Microcystis,Microcystis aeruginosa,Microcystis aeruginosa NIES-44                         |
| 851241503 | 123 | 171 | Euryarchaeota  | Methanosarcina lacustris              | Archaea,Euryarchaeota,Methanomicrobia,Methanosarcinales,Methanosarcinaceae,Methanosarcina,Methanosarcina lacustris                                 |
| 805377642 | 116 | 171 | Euryarchaeota  | Methanosarcina lacustris Z-7289       | Archaea,Euryarchaeota,Methanomicrobia,Methanosarcinales,Methanosarcinaceae,Methanosarcina,Methanosarcina lacustris,Methanosarcina lacustris Z-7289 |
| 852264147 | 118 | 172 | Cyanobacteria  | Crocospaera watsonii                  | Bacteria,Cyanobacteria,Oscillatoriophyceae,Chroococcales,Crocospaera,Crocospaera watsonii                                                          |
| 543532946 | 110 | 172 | Cyanobacteria  | Crocospaera watsonii WH 0402          | Bacteria,Cyanobacteria,Oscillatoriophyceae,Chroococcales,Crocospaera,Crocospaera watsonii,Crocospaera watsonii WH 0402                             |
| 302860576 | 103 | 173 | Proteobacteria | Burkholderiales bacterium 1_1_47      | Bacteria,Proteobacteria,Betaproteobacteriales,Burkholderiales,unclassified Burkholderiales (miscellaneous),Burkholderiales bacterium 1_1_47        |
| 302860570 | 106 | 173 | Proteobacteria | Burkholderiales bacterium 1_1_47      | Bacteria,Proteobacteria,Betaproteobacteriales,Burkholderiales,unclassified Burkholderiales (miscellaneous),Burkholderiales bacterium 1_1_47        |
| 763117502 | 99  | 174 | Cyanobacteria  | Microcystis aeruginosa                | Bacteria,Cyanobacteria,Oscillatoriophyceae,Chroococcales,Microcystis,Microcystis aeruginosa                                                        |
| 763117432 | 99  | 174 | Cyanobacteria  | Microcystis aeruginosa                | Bacteria,Cyanobacteria,Oscillatoriophyceae,Chroococcales,Microcystis,Microcystis aeruginosa                                                        |
| 442790464 | 92  | 175 | Cyanobacteria  | Gloeocapsa sp. PCC 73106              | Bacteria,Cyanobacteria,Oscillatoriophyceae,Chroococcales,Gloeocapsa,Gloeocapsa sp. PCC 73106                                                       |
| 736937830 | 96  | 175 | Cyanobacteria  | Gloeocapsa sp. PCC 73106              | Bacteria,Cyanobacteria,Oscillatoriophyceae,Chroococcales,Gloeocapsa,Gloeocapsa sp. PCC 73106                                                       |
| 491028078 | 91  | 176 | Firmicutes     | Anoxybacillus flavithermus            | Bacteria,Firmicutes,Bacilli,Bacillales,Bacillaceae,Anoxybacillus,Anoxybacillus flavithermus                                                        |
| 432001960 | 90  | 176 | Firmicutes     | Anoxybacillus flavithermus TNO-09.006 | Bacteria,Firmicutes,Bacilli,Bacillales,Bacillaceae,Anoxybacillus,Anoxybacillus flavithermus,Anoxybacillus flavithermus TNO-09.006                  |
| 442789060 | 88  | 177 | Cyanobacteria  | Gloeocapsa sp. PCC 73106              | Bacteria,Cyanobacteria,Oscillatoriophyceae,Chroococcales,Gloeocapsa,Gloeocapsa sp. PCC 73106                                                       |

|           |     |     |                  |                                         |    |                                                                                                                                                                                                 |
|-----------|-----|-----|------------------|-----------------------------------------|----|-------------------------------------------------------------------------------------------------------------------------------------------------------------------------------------------------|
| 736939038 | 90  | 177 | Cyanobacteria    | Gloeocapsa sp. PCC 73106                | 24 | Bacteria,Cyanobacteria,Oscillatoriothymonadaceae,Chroococcales,Gloeocapsa,Gloeocapsa sp. PCC 73106                                                                                              |
| 494521156 | 82  | 178 | Cyanobacteria    | Crocospaera watsonii                    | 14 | Bacteria,Cyanobacteria,Oscillatoriothymonadaceae,Chroococcales,Crocospaera,Crocospaera watsonii                                                                                                 |
| 852265072 | 82  | 178 | Cyanobacteria    | Crocospaera watsonii                    | 14 | Bacteria,Cyanobacteria,Oscillatoriothymonadaceae,Chroococcales,Crocospaera,Crocospaera watsonii                                                                                                 |
| 750682809 | 75  | 179 | Cyanobacteria    | Planktothrix                            | 8  | Bacteria,Cyanobacteria,Oscillatoriothymonadaceae,Oscillatoriales,Planktothrix                                                                                                                   |
| 738948968 | 75  | 179 | Cyanobacteria    | Planktothrix                            | 8  | Bacteria,Cyanobacteria,Oscillatoriothymonadaceae,Oscillatoriales,Planktothrix                                                                                                                   |
| 297141331 | 771 | 180 | Firmicutes       | [Bacillus] selenitireducens MLS10       | 2  | Bacteria,Firmicutes,Bacilli,Bacillales,Sporolactobacillaceae,unclassified Sporolactobacillaceae,[Bacillus] selenitireducens,[Bacillus] selenitireducens MLS10                                   |
| 512057519 | 549 | 181 | Actinobacteria   | Streptomyces sp. HGB0020                | 2  | Bacteria,Actinobacteria,Actinobacteria,Streptomycetales,Streptomycetaceae,Streptomyces,Streptomyces sp. HGB0020                                                                                 |
| 517101236 | 523 | 182 | Chlamydiae/Verru | Verrucomicrobium sp. 3C                 | 4  | Bacteria,Chlamydiae/Verrucomicrobia group,Verrucomicrobia,Verrucomicrobiae,Verrucomicrobiales,Verrucomicrobiaceae,Verrucomicrobium,Verrucomicrobium sp. 3C                                      |
| 474489591 | 516 | 183 | Proteobacteria   | Desulfotignum phosphitoxidans DSM 13687 | 1  | Bacteria,Proteobacteria,delta/epsilon subdivisions,Deltaproteobacteria,Desulfobacterales,Desulfobacteraceae,Desulfotignum,Desulfotignum phosphitoxidans,Desulfotignum phosphitoxidans DSM 13687 |
| 769144095 | 507 | 184 | Firmicutes       | Anaerostipes hadrus                     | 6  | Bacteria,Firmicutes,Clostridia,Clostridiales,Lachnospiraceae,Anaerostipes,Anaerostipes hadrus                                                                                                   |
| 503547901 | 497 | 185 | Firmicutes       | Mahella australiensis                   | 3  | Bacteria,Firmicutes,Clostridia,Thermoanaerobacteriales,Thermoanaerobacteriales Family IV. Incertae Sedis,Mahella,Mahella australiensis                                                          |
| 805378337 | 497 | 186 | Euryarchaeota    | Methanosarcina lacustris Z-7289         | 17 | Archaea,Euryarchaeota,Methanomicrobia,Methanosarcinales,Methanosarcinaceae,Methanosarcina,Methanosarcina lacustris,Methanosarcina lacustris Z-7289                                              |
| 251773297 | 494 | 187 | Nitrospirae      | Leptospirillum ferrodiazotrophum        | 14 | Bacteria,Nitrospirae,Nitrospira,Nitrospirales,Nitrospiraceae,Leptospirillum,Leptospirillum sp. Group III,Leptospirillum ferrodiazotrophum                                                       |
| 739495022 | 492 | 188 | Firmicutes       | Selenomonas sp. FC4001                  | 3  | Bacteria,Firmicutes,Negativicutes,Selenomonadales,Veillonellaceae,Selenomonas,Selenomonas sp. FC4001                                                                                            |
| 530929108 | 487 | 189 | Nitrospirae      | Leptospirillum sp. Group IV 'UBA BS'    | 8  | Bacteria,Nitrospirae,Nitrospira,Nitrospirales,Nitrospiraceae,Leptospirillum,Leptospirillum sp. Group IV,Leptospirillum sp. Group IV 'UBA BS'                                                    |
| 500122049 | 477 | 190 | Proteobacteria   | Polaromonas naphthalenivorans           | 4  | Bacteria,Proteobacteria,Betaproteobacteria,Burkholderiales,Comamonadaceae,Polaromonas,Polaromonas naphthalenivorans                                                                             |
| 524427328 | 477 | 191 | Firmicutes       | Clostridium sp. CAG:265                 | 1  | Bacteria,Firmicutes,Clostridia,Clostridiales,Clostridiaceae,Clostridium,environmental samples,Clostridium sp. CAG:265                                                                           |

|           |     |     |                    |                                     |                                                                                                                                                                                                  |
|-----------|-----|-----|--------------------|-------------------------------------|--------------------------------------------------------------------------------------------------------------------------------------------------------------------------------------------------|
| 530561424 | 477 | 192 | Euryarchaeota      | Ferroplasma sp. Type II             | 16 samples, Ferroplasma sp. Type II<br>Archaea, Euryarchaeota, Thermoplasmata, Thermoplasmatales, Ferroplasmaceae, Ferroplasma, environmental                                                    |
| 648405926 | 477 | 193 | Cyanobacteria      | Geitlerinema sp. PCC 7105           | 18 ma sp. PCC 7105<br>Bacteria, Cyanobacteria, Oscillatoriophyceae, Oscillatoriales, Geitlerinema, Geitlerinema sp. PCC 7105                                                                     |
| 655958159 | 477 | 194 | Proteobacteria     | Azohydromonas australica            | 1 omonas, Azohydromonas australica<br>Bacteria, Proteobacteria, Betaproteobacteria, Burkholderiales, Alcaligenaceae, Azohydromonas, Azohydromonas australica                                     |
| 530562869 | 476 | 195 | Euryarchaeota      | Ferroplasma sp. Type II             | 16 samples, Ferroplasma sp. Type II<br>Archaea, Euryarchaeota, Thermoplasmata, Thermoplasmatales, Ferroplasmaceae, Ferroplasma, environmental                                                    |
| 754582141 | 476 | 196 | Fibrobacteres/Acic | Pyrinomonas methylaliphatogenes     | 2 methylaliphatogenes<br>Bacteria, Fibrobacteres/Acidobacteria group, Acidobacteria, unclassified Acidobacteria, Acidobacteria subdivision 4, Pyrinomonas, Pyrinomonas                           |
| 297157261 | 475 | 197 | Actinobacteria     | Streptomyces bingchenggensis BCW-1  | 1 bingchenggensis BCW-1<br>Bacteria, Actinobacteria, Actinobacteria, Streptomyces, Streptomyces bingchenggensis, Streptomyces bingchenggensis BCW-1                                              |
| 530562102 | 475 | 198 | Euryarchaeota      | Ferroplasma sp. Type II             | 16 samples, Ferroplasma sp. Type II<br>Archaea, Euryarchaeota, Thermoplasmata, Thermoplasmatales, Ferroplasmaceae, Ferroplasma, environmental                                                    |
| 530559506 | 474 | 199 | Euryarchaeota      | Ferroplasma sp. Type II             | 16 samples, Ferroplasma sp. Type II<br>Archaea, Euryarchaeota, Thermoplasmata, Thermoplasmatales, Ferroplasmaceae, Ferroplasma, environmental                                                    |
| 917662534 | 474 | 200 | Firmicutes         | Thermincola ferriacetica            | 3 a ferriacetica<br>Bacteria, Firmicutes, Clostridia, Clostridiales, Peptococcaceae, Thermincola, Thermincola                                                                                    |
| 516257677 | 472 | 201 | Cyanobacteria      | Geitlerinema sp. PCC 7105           | 18 ma sp. PCC 7105<br>Bacteria, Cyanobacteria, Oscillatoriophyceae, Oscillatoriales, Geitlerinema, Geitlerinema sp. PCC 7105                                                                     |
| 530563573 | 472 | 202 | Euryarchaeota      | Ferroplasma sp. Type II             | 16 samples, Ferroplasma sp. Type II<br>Archaea, Euryarchaeota, Thermoplasmata, Thermoplasmatales, Ferroplasmaceae, Ferroplasma, environmental                                                    |
| 251771088 | 471 | 203 | Nitrospirae        | Leptospirillum ferrodiazotrophum    | 14 ferrodiazotrophum<br>Bacteria, Nitrospirae, Nitrospira, Nitrospirales, Nitrospiraceae, Leptospirillum, Leptospirillum sp. Group III, Leptospirillum                                           |
| 501634530 | 471 | 204 | Proteobacteria     | Acidithiobacillus ferrooxidans      | 2 ferrooxidans<br>Bacteria, Proteobacteria, Gammaproteobacteria, Acidithiobacillales, Acidithiobacillaceae, Acidithiobacillus, Acidithiobacillus                                                 |
| 503167716 | 471 | 205 | Firmicutes         | Caldicellulosiruptor hydrothermalis | 2 tor hydrothermalis<br>Bacteria, Firmicutes, Clostridia, Thermoanaerobacteriales, Thermoanaerobacteriales Family III. Incertae Sedis, Caldicellulosiruptor, Caldicellulosiruptor hydrothermalis |
| 503796304 | 471 | 206 | Proteobacteria     | Acidithiobacillus ferrivorans       | 11 ferrivorans<br>Bacteria, Proteobacteria, Gammaproteobacteria, Acidithiobacillales, Acidithiobacillaceae, Acidithiobacillus, Acidithiobacillus                                                 |



|           |     |     |                |                                         |                                                                                                                                                    |
|-----------|-----|-----|----------------|-----------------------------------------|----------------------------------------------------------------------------------------------------------------------------------------------------|
| 196183095 | 470 | 207 | Cyanobacteria  | Coleofasciculus chthonoplastes PCC 7420 | Bacteria,Cyanobacteria,Oscillatoriophycidae,Oscillatoriales,Coleofasciculus,Coleofasciculus chthonoplastes,Coleofasciculus chthonoplastes PCC 7420 |
| 654777069 | 470 | 208 | Proteobacteria | Burkholderia mimosarum                  | Bacteria,Proteobacteria,Betaproteobacteria,Burkholderiales,Burkholderiaceae,Burkholderia,Burkholderia mimosarum                                    |
| 740686785 | 470 | 209 | Proteobacteria | Acidithiobacillus caldus                | Bacteria,Proteobacteria,Gammaproteobacteria,Acidithiobacillales,Acidithiobacillaceae,Acidithiobacillus,Acidithiobacillus caldus                    |
| 516144719 | 469 | 210 | Actinobacteria | Nocardiosis kunsanensis                 | Bacteria,Actinobacteria,Actinobacteria,Streptosporangiales,Nocardiosporaceae,Nocardiosis,Nocardiosis kunsanensis                                   |
| 516255311 | 469 | 211 | Cyanobacteria  | Geitlerinema sp. PCC 7105               | Bacteria,Cyanobacteria,Oscillatoriophycidae,Oscillatoriales,Geitlerinema,Geitlerinema sp. PCC 7105                                                 |
| 737978609 | 468 | 212 | Proteobacteria | Burkholderia glathei                    | Bacteria,Proteobacteria,Betaproteobacteria,Burkholderiales,Burkholderiaceae,Burkholderia,Burkholderia glathei                                      |
| 671571726 | 467 | 213 | Firmicutes     | Oribacterium sp. FC2011                 | Bacteria,Firmicutes,Clostridia,Clostridiales,Lachnospiraceae,Oribacterium,Oribacterium sp. FC2011                                                  |
| 549495638 | 466 | 214 | Proteobacteria | Ralstonia pickettii                     | Bacteria,Proteobacteria,Betaproteobacteria,Burkholderiales,Burkholderiaceae,Ralstonia,Ralstonia pickettii                                          |
| 740240025 | 466 | 215 | Cyanobacteria  | Tolypothrix bouteillei                  | Bacteria,Cyanobacteria,Nostocales,Microchaetaceae,Tolypothrix,Tolypothrix bouteillei                                                               |
| 251771163 | 465 | 216 | Nitrospirae    | Leptospirillum ferrodiazotrophum        | Bacteria,Nitrospirae,Nitrospira,Nitrospirales,Nitrospiraceae,Leptospirillum,Leptospirillum sp. Group III,Leptospirillum ferrodiazotrophum          |
| 648401347 | 465 | 217 | Cyanobacteria  | Calothrix sp. PCC 7103                  | Bacteria,Cyanobacteria,Nostocales,Rivulariaceae,Calothrix,Calothrix sp. PCC 7103                                                                   |
| 836700638 | 464 | 218 | Proteobacteria | Burkholderia glathei                    | Bacteria,Proteobacteria,Betaproteobacteria,Burkholderiales,Burkholderiaceae,Burkholderia,Burkholderia glathei                                      |
| 491458270 | 462 | 219 | Actinobacteria | Streptomyces pristinaespiralis          | Bacteria,Actinobacteria,Actinobacteria,Streptomycetales,Streptomycetaceae,Streptomyces,Streptomyces pristinaespiralis                              |
| 780112544 | 462 | 220 | Proteobacteria | Thioploca ingrca                        | Bacteria,Proteobacteria,Gammaproteobacteria,Thiotrichales,Thiotrichaceae,Thioploca,Thioploca ingrca                                                |
| 218172972 | 461 | 221 | Cyanobacteria  | Cyanothece sp. PCC 7424                 | Bacteria,Cyanobacteria,Oscillatoriophycidae,Chroococcales,Cyanothece,Cyanothece sp. PCC 7424                                                       |
| 740252799 | 461 | 222 | Proteobacteria | Thiobacillus prosperus                  | Bacteria,Proteobacteria,Gammaproteobacteria,unclassified Gammaproteobacteria,Thiobacillus prosperus                                                |
| 515355474 | 460 | 223 | Cyanobacteria  | Fischerella muscicola                   | Bacteria,Cyanobacteria,Stigonematales,Fischerella,Fischerella muscicola                                                                            |
| 495182297 | 459 | 224 | Chloroflexi    | Ktedonobacter racemifer                 | Bacteria,Chloroflexi,Ktedonobacteria,Ktedonobacteriales,Ktedonobacteraceae,Ktedonobacter,Ktedonobacter racemifer                                   |

|           |     |     |                |                                      |                                                                                                                                                           |
|-----------|-----|-----|----------------|--------------------------------------|-----------------------------------------------------------------------------------------------------------------------------------------------------------|
| 500125461 | 459 | 225 | Proteobacteria | Polaromonas naphthalenivorans        | Bacteria, Proteobacteria, Betaproteobacteria, Burkholderiales, Comamonadaceae, Polaromonas, Polaromonas naphthalenivorans                                 |
| 530927150 | 459 | 226 | Nitrospirae    | Leptospirillum sp. Group IV 'UBA BS' | Bacteria, Nitrospirae, Nitrospira, Nitrospirales, Nitrospiraceae, Leptospirillum, Leptospirillum sp. Group IV, Leptospirillum sp.                         |
| 530927885 | 459 | 227 | Nitrospirae    | Leptospirillum sp. Group IV 'UBA BS' | Bacteria, Nitrospirae, Nitrospira, Nitrospirales, Nitrospiraceae, Leptospirillum, Leptospirillum sp. Group IV, Leptospirillum sp.                         |
| 917481455 | 459 | 228 | Firmicutes     | Paenibacillus wynnii                 | Bacteria, Firmicutes, Bacilli, Bacillales, Paenibacillaceae, Paenibacillus, Paenibacillus wynnii                                                          |
| 490176289 | 458 | 229 | Proteobacteria | Desulfobacter postgatei              | Bacteria, Proteobacteria, delta/epsilon subdivisions, Deltaproteobacteria, Desulfobacteriales, Desulfobacteraceae, Desulfobacter, Desulfobacter postgatei |
| 502796490 | 458 | 230 | Proteobacteria | Nitrosococcus halophilus             | Bacteria, Proteobacteria, Gammaproteobacteria, Chromatiales, Chromatiaceae, Nitrosococcus, Nitrosococcus halophilus                                       |
| 737207500 | 458 | 231 | Proteobacteria | Acidithiobacillus ferrivorans        | Bacteria, Proteobacteria, Gammaproteobacteria, Acidithiobacillales, Acidithiobacillaceae, Acidithiobacillus, Acidithiobacillus ferrivorans                |
| 829809554 | 458 | 232 | Proteobacteria | Diaphorobacter sp. J5-51             | Bacteria, Proteobacteria, Betaproteobacteria, Burkholderiales, Comamonadaceae, Diaphorobacter, Diaphorobacter sp. J5-51                                   |
| 915471230 | 458 | 233 | Proteobacteria | Burkholderia ambifaria               | Bacteria, Proteobacteria, Betaproteobacteria, Burkholderiales, Burkholderiaceae, Burkholderia, Burkholderia cepacia complex, Burkholderia ambifaria       |
| 505042970 | 457 | 234 | Cyanobacteria  | Dactylococcopsis salina              | Bacteria, Cyanobacteria, Oscillatoriophyceae, Chroococcales, Dactylococcopsis, Dactylococcopsis salina                                                    |
| 516353909 | 457 | 235 | Cyanobacteria  | Scytonema hofmanni                   | Bacteria, Cyanobacteria, Nostocales, Scytonemataceae, Scytonema, Scytonema hofmanni                                                                       |
| 549628277 | 457 | 236 | Proteobacteria | Ralstonia pickettii                  | Bacteria, Proteobacteria, Betaproteobacteria, Burkholderiales, Burkholderiaceae, Ralstonia, Ralstonia pickettii                                           |
| 654753328 | 457 | 237 | Proteobacteria | Burkholderia nodosa                  | Bacteria, Proteobacteria, Betaproteobacteria, Burkholderiales, Burkholderiaceae, Burkholderia, Burkholderia nodosa                                        |
| 910080418 | 457 | 238 | Firmicutes     | Anaerostipes hadrus                  | Bacteria, Firmicutes, Clostridia, Clostridiales, Lachnospiraceae, Anaerostipes, Anaerostipes hadrus                                                       |
| 910240999 | 457 | 239 | Cyanobacteria  | Tolypothrix bouteillei               | Bacteria, Cyanobacteria, Nostocales, Microchaetaceae, Tolypothrix, Tolypothrix bouteillei                                                                 |
| 910241764 | 457 | 240 | Cyanobacteria  | Tolypothrix bouteillei               | Bacteria, Cyanobacteria, Nostocales, Microchaetaceae, Tolypothrix, Tolypothrix bouteillei                                                                 |
| 496658392 | 456 | 241 | Firmicutes     | Coprobacillus sp. 3_3_56FAA          | Bacteria, Firmicutes, Erysipelotrichia, Erysipelotrichales, Erysipelotrichaceae, Coprobacillus, Coprobacillus sp. 3_3_56FAA                               |
| 503796369 | 456 | 242 | Proteobacteria | Acidithiobacillus ferrivorans        | Bacteria, Proteobacteria, Gammaproteobacteria, Acidithiobacillales, Acidithiobacillaceae, Acidithiobacillus, Acidithiobacillus ferrivorans                |

|           |     |     |                            |                                       |                                                                                                                                                                        |
|-----------|-----|-----|----------------------------|---------------------------------------|------------------------------------------------------------------------------------------------------------------------------------------------------------------------|
| 516352542 | 456 | 243 | Cyanobacteria              | Scytonema hofmanni                    | 13 hofmanni<br>Bacteria,Cyanobacteria,Nostocales,Scytonemataceae,Scytonema,Scytonema                                                                                   |
| 736413103 | 456 | 244 | Proteobacteria             | Candidatus<br>Contendobacter odensis  | 2 Contendobacter odensis<br>Bacteria,Proteobacteria,Gammaproteobacteria,unclassified<br>Gammaproteobacteria,Competibacteraceae,Candidatus<br>Contendobacter,Candidatus |
| 759564206 | 456 | 245 | Proteobacteria             | Burkholderia oxyphila                 | 2 holderia,Burkholderia oxyphila<br>Bacteria,Proteobacteria,Betaproteobacteria,Burkholderiales,Burkholderiaceae,Burk                                                   |
| 916987011 | 456 | 246 | Proteobacteria             | Achromobacter sp. DH1f                | 1 obacter,Achromobacter sp. DH1f<br>Bacteria,Proteobacteria,Betaproteobacteria,Burkholderiales,Alcaligenaceae,Achrom                                                   |
| 749554550 | 455 | 247 | Proteobacteria             | Halomonas salina                      | 1 alomonas,Halomonas salina<br>Bacteria,Proteobacteria,Gammaproteobacteria,Oceanospirillales,Halomonadaceae,H                                                          |
| 501633885 | 454 | 248 | Proteobacteria             | Acidithiobacillus<br>ferrooxidans     | 2 ferrooxidans<br>Bacteria,Proteobacteria,Gammaproteobacteria,Acidithiobacillales,Acidithiobacillaceae,Acidithiobacillus,Acidithiobacillus                             |
| 488782245 | 453 | 249 | Bacteroidetes/Chlorobi     | Microscilla marina                    | 1 marina<br>Bacteria,Bacteroidetes/Chlorobi group,Bacteroidetes,Cytophagia,Cytophagales,Cytophagaceae,Microscilla,Microscilla                                          |
| 517126235 | 453 | 250 | Proteobacteria             | Cupriavidus sp.<br>UYPR2.512          | 1 avidus,Cupriavidus sp. UYPR2.512<br>Bacteria,Proteobacteria,Betaproteobacteria,Burkholderiales,Burkholderiaceae,Cupri                                                |
| 702616456 | 453 | 251 | Actinobacteria             | Streptomyces virginiae                | 1 omyces,Streptomyces virginiae<br>Bacteria,Actinobacteria,Actinobacteria,Streptomycetales,Streptomycetaceae,Strept                                                    |
| 914619641 | 453 | 252 | Firmicutes                 | Lactobacillus agilis                  | 1 agilis<br>Bacteria,Firmicutes,Bacilli,Lactobacillales,Lactobacillaceae,Lactobacillus,Lactobacillus                                                                   |
| 120596178 | 452 | 253 | Proteobacteria             | Polaromonas<br>naphthalenivorans CJ2  | 2 naphthalenivorans CJ2<br>Bacteria,Proteobacteria,Betaproteobacteria,Burkholderiales,Comamonadaceae,Polaromonas,Polaromonas naphthalenivorans,Polaromonas             |
| 291529497 | 452 | 254 | Firmicutes                 | Eubacterium rectale<br>M104/1         | 2 rectale,Eubacterium rectale M104/1<br>Bacteria,Firmicutes,Clostridia,Clostridiales,Eubacteriaceae,Eubacterium,Eubacterium                                            |
| 517100800 | 451 | 255 | Chlamydiae/Verrucomicrobia | Verrucomicrobium sp.<br>3C            | 4 3C<br>Bacteria,Chlamydiae/Verrucomicrobia group,Verrucomicrobia,Verrucomicrobiae,Verrucomicrobiales,Verrucomicrobiaceae,Verrucomicrobium,Verrucomicrobium sp.        |
| 651374235 | 451 | 256 | Firmicutes                 | Caldanaerobius<br>polysaccharolyticus | 1 polysaccharolyticus<br>Bacteria,Firmicutes,Clostridia,Thermoanaerobacterales,Thermoanaerobacteraceae,Caldanaerobius,Caldanaerobius                                   |
| 916576584 | 450 | 257 | Actinobacteria             | Streptomyces sp.<br>HGB0020           | 2 omyces,Streptomyces sp. HGB0020<br>Bacteria,Actinobacteria,Actinobacteria,Streptomycetales,Streptomycetaceae,Strept                                                  |
| 490173387 | 449 | 258 | Proteobacteria             | Desulfobacter postgatei               | 2 er,Desulfobacter postgatei<br>Bacteria,Proteobacteria,delta/epsilon subdivisions,Deltaproteobacteria,Desulfobacterales,Desulfobacteraceae,Desulfobact                |

|           |     |     |                |                                         |                                                                                                                                                         |
|-----------|-----|-----|----------------|-----------------------------------------|---------------------------------------------------------------------------------------------------------------------------------------------------------|
| 502734885 | 449 | 259 | Proteobacteria | Allochromatium vinosum                  | Bacteria,Proteobacteria,Gammaproteobacteria,Chromatiales,Chromatiaceae,Allochromatium,Allochromatium vinosum                                            |
| 851245734 | 449 | 260 | Euryarchaeota  | Methanosarcina lacustris                | Archaea,Euryarchaeota,Methanomicrobia,Methanosarcinales,Methanosarcinaceae,Methanosarcina,Methanosarcina lacustris                                      |
| 916325889 | 449 | 261 | Actinobacteria | Nocardiosis gilva                       | Bacteria,Actinobacteria,Actinobacteria,Streptosporangiales,Nocardiopsaceae,Nocardiosis,Nocardiosis gilva                                                |
| 494100423 | 448 | 262 | Proteobacteria | Thiorhodococcus drewsii                 | Bacteria,Proteobacteria,Gammaproteobacteria,Chromatiales,Chromatiaceae,Thiorhodococcus,Thiorhodococcus drewsii                                          |
| 497835978 | 448 | 263 | Proteobacteria | SAR324 cluster bacterium JCVI-SC AAA005 | Bacteria,Proteobacteria,delta/epsilon subdivisions,Deltaproteobacteria,unclassified Deltaproteobacteria,SAR324 cluster,SAR324 cluster bacterium JCVI-SC |
| 571050767 | 448 | 264 | environmental  | san Contig26                            | 2 AAA005<br>Bacteria,environmental samples,uncultured bacterium Contig26                                                                                |
| 640592508 | 448 | 265 | Firmicutes     | Lactobacillus equi                      | Bacteria,Firmicutes,Bacilli,Lactobacillales,Lactobacillaceae,Lactobacillus,Lactobacillus equi                                                           |
| 662066808 | 448 | 266 | Firmicutes     | Clostridium botulinum                   | Bacteria,Firmicutes,Clostridia,Clostridiales,Clostridiaceae,Clostridium,Clostridium botulinum                                                           |
| 737612985 | 448 | 267 | Proteobacteria | Halomonas sp. TG39a                     | Bacteria,Proteobacteria,Gammaproteobacteria,Oceanospirillales,Halomonadaceae,Halomonas,Halomonas sp. TG39a                                              |
| 740584636 | 448 | 268 | Actinobacteria | Brachybacterium phenoliresistens        | Bacteria,Actinobacteria,Actinobacteria,Micrococcales,Dermabacteraceae,Brachybacterium,Brachybacterium phenoliresistens                                  |
| 520868253 | 446 | 269 | Proteobacteria | Pseudomonas stutzeri                    | Bacteria,Proteobacteria,Gammaproteobacteria,Pseudomonadales,Pseudomonadaceae,Pseudomonas,Pseudomonas stutzeri group,Pseudomonas stutzeri                |
| 640591712 | 446 | 270 | Firmicutes     | Lactobacillus equi                      | Bacteria,Firmicutes,Bacilli,Lactobacillales,Lactobacillaceae,Lactobacillus,Lactobacillus equi                                                           |
| 851270337 | 446 | 271 | Euryarchaeota  | Methanosarcina horonobensis             | Archaea,Euryarchaeota,Methanomicrobia,Methanosarcinales,Methanosarcinaceae,Methanosarcina,Methanosarcina horonobensis                                   |
| 495010668 | 445 | 272 | Proteobacteria | Burkholderia sp. BT03                   | Bacteria,Proteobacteria,Betaproteobacteria,Burkholderiales,Burkholderiaceae,Burkholderia,Burkholderia sp. BT03                                          |
| 503043082 | 445 | 273 | Firmicutes     | Acetohalobium arabaticum                | Bacteria,Firmicutes,Clostridia,Halanaerobiales,Halobacteroidaceae,Acetohalobium,Acetohalobium arabaticum                                                |
| 738539867 | 445 | 274 | Cyanobacteria  | Myxosarcina sp. GI1                     | Bacteria,Cyanobacteria,Pleurocapsales,Myxosarcina,Myxosarcina sp. GI1                                                                                   |
| 763349453 | 445 | 275 | Cyanobacteria  | Coleofasciculus chthonoplastes          | Bacteria,Cyanobacteria,Oscillatoriophyceae,Oscillatoriales,Coleofasciculus,Coleofasciculus chthonoplastes                                               |
| 495454362 | 444 | 276 | Cyanobacteria  | Moorea producents                       | Bacteria,Cyanobacteria,Oscillatoriophyceae,Oscillatoriales,Moorea,Moorea producents                                                                     |
| 495466178 | 444 | 277 | Cyanobacteria  | Moorea producents                       | Bacteria,Cyanobacteria,Oscillatoriophyceae,Oscillatoriales,Moorea,Moorea producents                                                                     |

|           |     |     |                             |                                     |                                                                                                                                                          |
|-----------|-----|-----|-----------------------------|-------------------------------------|----------------------------------------------------------------------------------------------------------------------------------------------------------|
|           |     |     |                             |                                     | Bacteria,Firmicutes,Clostridia,Thermoanaerobacterales,Thermoanaerobacterales Family III. Incertae Sedis,Caldicellulosiruptor,Caldicellulosiruptor bescii |
| 506389025 | 443 | 278 | Firmicutes                  | Caldicellulosiruptor bescii         | 3                                                                                                                                                        |
| 516360165 | 443 | 279 | Cyanobacteria               | Scytonema hofmanni                  | 13                                                                                                                                                       |
| 771520715 | 443 | 280 | Firmicutes                  | Caldicellulosiruptor sp. Wai35.B1   | 1                                                                                                                                                        |
| 516350411 | 442 | 281 | Cyanobacteria               | Scytonema hofmanni                  | 13                                                                                                                                                       |
| 764526366 | 442 | 282 | Proteobacteria              | Thioalkalimicrobium microaerophilum | 1                                                                                                                                                        |
| 917194967 | 442 | 283 | Actinobacteria              | Streptomyces sp. NRRL F-525         | 1                                                                                                                                                        |
| 495188212 | 441 | 284 | Chloroflexi                 | Ktedonobacter racemifer             | 52                                                                                                                                                       |
| 516352019 | 441 | 285 | Cyanobacteria               | Scytonema hofmanni                  | 13                                                                                                                                                       |
| 780103597 | 441 | 286 | Proteobacteria              | Thioploca ingrica                   | 2                                                                                                                                                        |
| 917378057 | 441 | 287 | Proteobacteria              | Acidithiobacillus ferrivorans       | 11                                                                                                                                                       |
| 495185167 | 440 | 288 | Chloroflexi                 | Ktedonobacter racemifer             | 52                                                                                                                                                       |
| 516355684 | 439 | 289 | Cyanobacteria               | Scytonema hofmanni                  | 13                                                                                                                                                       |
| 754583666 | 439 | 290 | Fibrobacteres/Acidobacteria | Pyrinomonas methylaliphatogenes     | 2                                                                                                                                                        |
| 916793994 | 439 | 291 | Proteobacteria              | Campylobacter fetus                 | 1                                                                                                                                                        |
| 917219793 | 439 | 292 | Actinobacteria              | Streptomyces violaceoruber          | 1                                                                                                                                                        |
| 918439172 | 439 | 293 | Cyanobacteria               | Tolypothrix campylonemoides         | 6                                                                                                                                                        |
| 495193778 | 438 | 294 | Chloroflexi                 | Ktedonobacter racemifer             | 52                                                                                                                                                       |

|           |     |     |                     |                                                               |                                                                                                                                                   |
|-----------|-----|-----|---------------------|---------------------------------------------------------------|---------------------------------------------------------------------------------------------------------------------------------------------------|
| 501164377 | 438 | 295 | Thermotogae         | Petrotoga mobilis                                             | Bacteria,Thermotogae,Thermotogae,Petrotogales,Petrotogaceae,Petrotoga,Petrotoga mobilis                                                           |
| 504988195 | 438 | 296 | Cyanobacteria       | Oscillatoria nigro-viridis                                    | Bacteria,Cyanobacteria,Oscillatoriophyceae,Oscillatoriales,Oscillatoria,Oscillatoria nigro-viridis                                                |
| 665859048 | 438 | 297 | Actinobacteria      | Streptomyces roseochromogenus                                 | Bacteria,Actinobacteria,Actinobacteria,Streptomycetales,Streptomycetaceae,Streptomyces,Streptomyces roseochromogenus                              |
| 495179835 | 437 | 298 | Chloroflexi         | Ktedonobacter racemifer                                       | Bacteria,Chloroflexi,Ktedonobacteria,Ktedonobacterales,Ktedonobacteraceae,Ktedonobacter,Ktedonobacter racemifer                                   |
| 748817658 | 437 | 299 | Firmicutes          | Bacillus sp. REN51N                                           | Bacteria,Firmicutes,Bacilli,Bacillales,Bacillaceae,Bacillus,Bacillus sp. REN51N                                                                   |
| 495179135 | 436 | 300 | Chloroflexi         | Ktedonobacter racemifer                                       | Bacteria,Chloroflexi,Ktedonobacteria,Ktedonobacterales,Ktedonobacteraceae,Ktedonobacter,Ktedonobacter racemifer                                   |
| 501164645 | 436 | 301 | Thermotogae         | Petrotoga mobilis                                             | Bacteria,Thermotogae,Thermotogae,Petrotogales,Petrotogaceae,Petrotoga,Petrotoga mobilis                                                           |
| 516184175 | 436 | 302 | Actinobacteria      | Nocardiopsis lucentensis                                      | Bacteria,Actinobacteria,Actinobacteria,Streptosporangiales,Nocardiopsaceae,Nocardiopsis,Nocardiopsis lucentensis                                  |
| 723287658 | 436 | 303 | Proteobacteria      | Candidatus Thiomargarita nelsonii                             | Bacteria,Proteobacteria,Gammaproteobacteria,Thiotrichales,Thiotrichaceae,Thiomargarita,Candidatus Thiomargarita nelsonii                          |
| 723288870 | 436 | 304 | Proteobacteria      | Candidatus Thiomargarita nelsonii                             | Bacteria,Proteobacteria,Gammaproteobacteria,Thiotrichales,Thiotrichaceae,Thiomargarita,Candidatus Thiomargarita nelsonii                          |
| 818877501 | 436 | 305 | unclassified Bacter | Microgenomates (Gottesmanbacteria) bacterium GW2011_GWB1_49_7 | Bacteria,unclassified Bacteria,Microgenomates,unclassified Microgenomates,Microgenomates (Gottesmanbacteria) bacterium GW2011_GWB1_49_7           |
| 564812736 | 435 | 306 | Firmicutes          | Lactobacillus equi                                            | Bacteria,Firmicutes,Bacilli,Lactobacillales,Lactobacillaceae,Lactobacillus,Lactobacillus equi                                                     |
| 664394896 | 435 | 307 | Actinobacteria      | Streptosporangium amethystogenes                              | Bacteria,Actinobacteria,Actinobacteria,Streptosporangiales,Streptosporangiaceae,Streptosporangium,Streptosporangium amethystogenes                |
| 736402546 | 435 | 308 | Firmicutes          | Clostridiales bacterium DRI-13                                | Bacteria,Firmicutes,Clostridia,Clostridiales,unclassified Clostridiales,unclassified Clostridiales (miscellaneous),Clostridiales bacterium DRI-13 |
| 737473603 | 435 | 309 | Firmicutes          | Lactobacillus composti                                        | Bacteria,Firmicutes,Bacilli,Lactobacillales,Lactobacillaceae,Lactobacillus,Lactobacillus composti                                                 |
| 836681294 | 435 | 310 | Firmicutes          | Peptococcaceae bacterium CEB3                                 | Bacteria,Firmicutes,Clostridia,Clostridiales,Peptococcaceae,unclassified Peptococcaceae,Peptococcaceae bacterium CEB3                             |
| 516143664 | 434 | 311 | Actinobacteria      | Nocardiopsis kunsanensis                                      | Bacteria,Actinobacteria,Actinobacteria,Streptosporangiales,Nocardiopsaceae,Nocardiopsis,Nocardiopsis kunsanensis                                  |
| 737472691 | 434 | 312 | Firmicutes          | Lactobacillus composti                                        | Bacteria,Firmicutes,Bacilli,Lactobacillales,Lactobacillaceae,Lactobacillus,Lactobacillus composti                                                 |

|           |     |     |                  |                                   |                                                                                                                                                                                  |
|-----------|-----|-----|------------------|-----------------------------------|----------------------------------------------------------------------------------------------------------------------------------------------------------------------------------|
| 505041320 | 433 | 313 | Cyanobacteria    | Dactylococcopsis salina           | Bacteria,Cyanobacteria,Oscillatoriophyceae,Chroococcales,Dactylococcopsis,Dactylococcopsis salina                                                                                |
| 657933271 | 433 | 314 | Cyanobacteria    | [Scytonema hofmanni] UTEX B 1581  | Bacteria,Cyanobacteria,Nostocales,Microchaetaceae,Tolypothrix,[Scytonema hofmanni] UTEX B 1581                                                                                   |
| 749573854 | 433 | 315 | Proteobacteria   | Geoalkalibacter subterraneus      | Bacteria,Proteobacteria,delta/epsilon subdivisions,Deltaproteobacteria,Desulfurimonadales,Geobacteraceae,Geoalkalibacter,Geoalkalibacter subterraneus                            |
| 759564135 | 433 | 316 | Proteobacteria   | Burkholderia oxyphila             | Bacteria,Proteobacteria,Betaproteobacteria,Burkholderiales,Burkholderiaceae,Burkholderia,Burkholderia oxyphila                                                                   |
| 763126099 | 433 | 317 | Firmicutes       | Lactobacillus salivarius          | Bacteria,Firmicutes,Bacilli,Lactobacillales,Lactobacillaceae,Lactobacillus,Lactobacillus salivarius                                                                              |
| 889959964 | 433 | 318 | Cyanobacteria    | Scytonema tolypothrichoides       | Bacteria,Cyanobacteria,Nostocales,Scytonemataceae,Scytonema,Scytonema tolypothrichoides                                                                                          |
| 916921277 | 433 | 319 | Firmicutes       | Lactobacillus equi                | Bacteria,Firmicutes,Bacilli,Lactobacillales,Lactobacillaceae,Lactobacillus,Lactobacillus equi                                                                                    |
| 495192221 | 432 | 320 | Chloroflexi      | Ktedonobacter racemifer           | Bacteria,Chloroflexi,Ktedonobacteria,Ktedonobacterales,Ktedonobacteraceae,Ktedonobacter,Ktedonobacter racemifer                                                                  |
| 736504009 | 432 | 321 | Actinobacteria   | Actinomadura rifamycinii          | Bacteria,Actinobacteria,Actinobacteria,Streptosporangiales,Thermomonosporaceae,Actinomadura,Actinomadura rifamycinii                                                             |
| 763475824 | 432 | 322 | Firmicutes       | Peptoclostridium difficile        | Bacteria,Firmicutes,Clostridia,Clostridiales,Peptostreptococcaceae,Peptoclostridium,Peptoclostridium difficile                                                                   |
| 496349795 | 431 | 323 | Chlamydiae/Verru | Methylacidiphilum fumariolicum    | Bacteria,Chlamydiae/Verrucomicrobia group,Verrucomicrobia,unclassified Verrucomicrobia,Methylacidiphilales,Methylacidiphilaceae,Methylacidiphilum,Methylacidiphilum fumariolicum |
| 505037441 | 431 | 324 | Cyanobacteria    | Halothece sp. PCC 7418            | Bacteria,Cyanobacteria,Oscillatoriophyceae,Chroococcales,Halothece cluster,Halothece,Halothece sp. PCC 7418                                                                      |
| 703021414 | 431 | 325 | Actinobacteria   | Actinomadura madurae              | Bacteria,Actinobacteria,Actinobacteria,Streptosporangiales,Thermomonosporaceae,Actinomadura,Actinomadura madurae                                                                 |
| 723282587 | 431 | 326 | Proteobacteria   | Candidatus Thiomargarita nelsonii | Bacteria,Proteobacteria,Gammaproteobacteria,Thiotrichales,Thiotrichaceae,Thiomargarita,Candidatus Thiomargarita nelsonii                                                         |
| 737210766 | 431 | 327 | Proteobacteria   | Acidithiobacillus ferrivorans     | Bacteria,Proteobacteria,Gammaproteobacteria,Acidithiobacillales,Acidithiobacillaceae,Acidithiobacillus,Acidithiobacillus ferrivorans                                             |
| 764393758 | 431 | 328 | Proteobacteria   | Raoultella ornithinolytica        | Bacteria,Proteobacteria,Gammaproteobacteria,Enterobacteriales,Enterobacteriaceae,Raoultella,Raoultella ornithinolytica                                                           |
| 880798139 | 431 | 329 | Cyanobacteria    | Moorea bouillonii PNG5-198        | Bacteria,Cyanobacteria,Oscillatoriophyceae,Oscillatoriales,Moorea,Moorea bouillonii,Moorea bouillonii PNG5-198                                                                   |

|           |     |     |                |                                   |                                                                                                                                 |
|-----------|-----|-----|----------------|-----------------------------------|---------------------------------------------------------------------------------------------------------------------------------|
| 504992636 | 430 | 330 | Cyanobacteria  | Oscillatoria nigro-viridis        | Bacteria,Cyanobacteria,Oscillatoriophycid eae,Oscillatoriales,Oscillatoria,Oscillatoria<br>4 nigro-viridis                      |
| 505023946 | 430 | 331 | Cyanobacteria  | Cylindrospermum stagnale          | Bacteria,Cyanobacteria,Nostocales,Nostocaceae,Cylindrospermum,Cylindrospermu<br>2 m stagnale                                    |
| 656263327 | 430 | 332 | Euryarchaeota  | euryarchaeote SCGC AAA261-G15     | Archaea,Euryarchaeota,unclassified Euryarchaeota,unclassified Euryarchaeota (miscellaneous),euryarchaeote SCGC<br>1 AAA261-G15  |
| 657934620 | 430 | 333 | Cyanobacteria  | [Scytonema hofmanni] UTEX B 1581  | Bacteria,Cyanobacteria,Nostocales,Microc haetaceae,Tolypothrix,[Scytonema<br>10 hofmanni] UTEX B 1581                           |
| 821562027 | 430 | 334 | Proteobacteria | Microvirga sp. JC119              | Bacteria,Proteobacteria,Alphaproteobacte ria,Rhizobiales,Methylobacteriaceae,Micr<br>1 ovirga,Microvirga sp. JC119              |
| 916738862 | 430 | 335 | Nitrospirae    | Thermodesulfovibrio islandicus    | Bacteria,Nitrospirae,Nitrospira,Nitrospirales,Nitrospiraceae,Thermodesulfovibrio,Th<br>1 ermodesulfovibrio islandicus           |
| 495179751 | 429 | 336 | Chloroflexi    | Ktedonobacter racemifer           | Bacteria,Chloroflexi,Ktedonobacteria,Kted onobacterales,Ktedonobacteraceae,Ktedo<br>52 nobacter,Ktedonobacter racemifer         |
| 495186450 | 429 | 337 | Chloroflexi    | Ktedonobacter racemifer           | Bacteria,Chloroflexi,Ktedonobacteria,Kted onobacterales,Ktedonobacteraceae,Ktedo<br>52 nobacter,Ktedonobacter racemifer         |
| 495198645 | 429 | 338 | Chloroflexi    | Ktedonobacter racemifer           | Bacteria,Chloroflexi,Ktedonobacteria,Kted onobacterales,Ktedonobacteraceae,Ktedo<br>52 nobacter,Ktedonobacter racemifer         |
| 495461888 | 429 | 339 | Cyanobacteria  | Moorea producens                  | Bacteria,Cyanobacteria,Oscillatoriophycid eae,Oscillatoriales,Moorea,Moorea<br>19 producens                                     |
| 495466227 | 429 | 340 | Cyanobacteria  | Moorea producens                  | Bacteria,Cyanobacteria,Oscillatoriophycid eae,Oscillatoriales,Moorea,Moorea<br>19 producens                                     |
| 750554050 | 429 | 341 | Actinobacteria | Streptomyces acidiscabies         | Bacteria,Actinobacteria,Actinobacteria,Stre ptomycetales,Streptomycetaceae,Strept<br>1 omyces,Streptomyces acidiscabies         |
| 495459261 | 428 | 342 | Cyanobacteria  | Moorea producens                  | Bacteria,Cyanobacteria,Oscillatoriophycid eae,Oscillatoriales,Moorea,Moorea<br>19 producens                                     |
| 495466254 | 428 | 343 | Cyanobacteria  | Moorea producens                  | Bacteria,Cyanobacteria,Oscillatoriophycid eae,Oscillatoriales,Moorea,Moorea<br>19 producens                                     |
| 518327680 | 428 | 344 | Cyanobacteria  | Calothrix sp. PCC 7103            | Bacteria,Cyanobacteria,Nostocales,Rivular iaceae,Calothrix,Calothrix sp. PCC 7103<br>6                                          |
| 648407024 | 428 | 345 | Cyanobacteria  | Oscillatoria sp. PCC 10802        | Bacteria,Cyanobacteria,Oscillatoriophycid eae,Oscillatoriales,Oscillatoria,Oscillatoria<br>1 sp. PCC 10802                      |
| 723284236 | 428 | 346 | Proteobacteria | Candidatus Thiomargarita nelsonii | Bacteria,Proteobacteria,Gammaproteobac teria,Thiotrichales,Thiotrichaceae,Thioma<br>10 garita,Candidatus Thiomargarita nelsonii |
| 764673158 | 428 | 347 | Cyanobacteria  | Mastigocladus laminosus           | Bacteria,Cyanobacteria,Stigonematales,M<br>4 astigocladus,Mastigocladus laminosus                                               |
| 493029926 | 427 | 348 | Cyanobacteria  | Coleofasciculus chthonoplastes    | Bacteria,Cyanobacteria,Oscillatoriophycid eae,Oscillatoriales,Coleofasciculus,Coleofa<br>25 sciculus chthonoplastes             |
| 494598848 | 427 | 349 | Cyanobacteria  | Kamptonema                        | Bacteria,Cyanobacteria,Oscillatoriophycid eae,Oscillatoriales,Kamptonema<br>3                                                   |



|           |     |     |                  |                                     |                                                                                                                                                                               |
|-----------|-----|-----|------------------|-------------------------------------|-------------------------------------------------------------------------------------------------------------------------------------------------------------------------------|
| 495453270 | 427 | 350 | Cyanobacteria    | Moorea producens                    | 19<br>Bacteria,Cyanobacteria,Oscillatoriophycid<br>eae,Oscillatoriales,Moorea,Moorea                                                                                          |
| 495465906 | 427 | 351 | Cyanobacteria    | Moorea producens                    | 19<br>Bacteria,Cyanobacteria,Oscillatoriophycid<br>eae,Oscillatoriales,Moorea,Moorea                                                                                          |
| 499309054 | 427 | 352 | Cyanobacteria    | Nostoc sp. PCC 7120                 | 3<br>Bacteria,Cyanobacteria,Nostocales,Nostoc<br>aceae,Nostoc,Nostoc sp. PCC 7120                                                                                             |
| 499635620 | 427 | 353 | Cyanobacteria    | Anabaena variabilis                 | 2<br>Bacteria,Cyanobacteria,Nostocales,Nostoc<br>aceae,Anabaena,Anabaena variabilis                                                                                           |
| 499636046 | 427 | 354 | Cyanobacteria    | Anabaena variabilis                 | 2<br>Bacteria,Cyanobacteria,Nostocales,Nostoc<br>aceae,Anabaena,Anabaena variabilis                                                                                           |
| 502797006 | 427 | 355 | Proteobacteria   | Nitrosococcus halophilus            | 7<br>Bacteria,Proteobacteria,Gammaproteobac<br>teria,Chromatiales,Chromatiaceae,Nitroso<br>coccus,Nitrosococcus halophilus                                                    |
| 503088871 | 427 | 356 | Cyanobacteria    | Cyanothece sp. PCC<br>7822          | 8<br>Bacteria,Cyanobacteria,Oscillatoriophycid<br>eae,Chroococcales,Cyanothece,Cyanothec<br>e sp. PCC 7822                                                                    |
| 504893952 | 427 | 357 | Cyanobacteria    | Anabaena sp. 90                     | 4<br>Bacteria,Cyanobacteria,Nostocales,Nostoc<br>aceae,Anabaena,Anabaena sp. 90                                                                                               |
| 505014506 | 427 | 358 | Cyanobacteria    | Crinalium epipsammum                | 3<br>Bacteria,Cyanobacteria,Oscillatoriophycid<br>eae,Oscillatoriales,Crinalium,Crinalium                                                                                     |
| 515883076 | 427 | 359 | Cyanobacteria    | Stigonematales                      | 1<br>Bacteria,Cyanobacteria,Stigonematales                                                                                                                                    |
| 515883518 | 427 | 360 | Cyanobacteria    | Mastigocladopsis repens             | 4<br>Bacteria,Cyanobacteria,Stigonematales,M<br>astigocladopsis,Mastigocladopsis repens                                                                                       |
| 516256579 | 427 | 361 | Cyanobacteria    | Geitlerinema sp. PCC<br>7105        | 18<br>Bacteria,Cyanobacteria,Oscillatoriophycid<br>eae,Oscillatoriales,Geitlerinema,Geitlerine<br>ma sp. PCC 7105                                                             |
| 517100807 | 427 | 362 | Chlamydiae/Verru | Verrucomicrobium sp.<br>3C          | 4<br>Bacteria,Chlamydiae/Verrucomicrobia<br>group,Verrucomicrobia,Verrucomicrobiae,<br>Verrucomicrobiales,Verrucomicrobiaceae,<br>Verrucomicrobium,Verrucomicrobium sp.<br>3C |
| 518324846 | 427 | 363 | Cyanobacteria    | Calothrix sp. PCC 7103              | 6<br>Bacteria,Cyanobacteria,Nostocales,Rivular<br>iaceae,Calothrix,Calothrix sp. PCC 7103                                                                                     |
| 652319815 | 427 | 364 | Cyanobacteria    | Fischerella sp. PCC 9431            | 3<br>Bacteria,Cyanobacteria,Stigonematales,Fis<br>cherella,Fischerella sp. PCC 9431                                                                                           |
| 652324245 | 427 | 365 | Cyanobacteria    | Fischerella sp. PCC 9431            | 3<br>Bacteria,Cyanobacteria,Stigonematales,Fis<br>cherella,Fischerella sp. PCC 9431                                                                                           |
| 653226247 | 427 | 366 | Firmicutes       | Lachnospira multipara               | 1<br>Bacteria,Firmicutes,Clostridia,Clostridiales<br>,Lachnospiraceae,Lachnospira,Lachnospira                                                                                 |
| 654350231 | 427 | 367 | Cyanobacteria    | Mastigocoleus testarum              | 4<br>Bacteria,Cyanobacteria,Stigonematales,M<br>astigocoleus,Mastigocoleus testarum                                                                                           |
| 654617757 | 427 | 368 | Cyanobacteria    | Dolichospermum<br>circinale         | 2<br>Bacteria,Cyanobacteria,Nostocales,Nostoc<br>aceae,Dolichospermum,Dolichospermum                                                                                          |
| 657929237 | 427 | 369 | Cyanobacteria    | [Scytonema hofmanni]<br>UTEX B 1581 | 10<br>Bacteria,Cyanobacteria,Nostocales,Microc<br>haetaceae,Tolypothrix,[Scytonema<br>hofmanni] UTEX B 1581                                                                   |
| 657932534 | 427 | 370 | Cyanobacteria    | [Scytonema hofmanni]<br>UTEX B 1581 | 10<br>Bacteria,Cyanobacteria,Nostocales,Microc<br>haetaceae,Tolypothrix,[Scytonema<br>hofmanni] UTEX B 1581                                                                   |
| 657932541 | 427 | 371 | Cyanobacteria    | [Scytonema hofmanni]<br>UTEX B 1581 | 10<br>Bacteria,Cyanobacteria,Nostocales,Microc<br>haetaceae,Tolypothrix,[Scytonema<br>hofmanni] UTEX B 1581                                                                   |
| 748134943 | 427 | 372 | Cyanobacteria    | Scytonema millei                    | 2<br>Bacteria,Cyanobacteria,Nostocales,Scyton<br>emataceae,Scytonema,Scytonema millei                                                                                         |

|           |     |     |                  |                                  |                                                                                                                                                              |
|-----------|-----|-----|------------------|----------------------------------|--------------------------------------------------------------------------------------------------------------------------------------------------------------|
| 763350561 | 427 | 373 | Cyanobacteria    | Coleofasciculus chthonoplastes   | 25 Bacteria,Cyanobacteria,Oscillatorioophycidae,Oscillatoriales,Coleofasciculus,Coleofasciculus chthonoplastes                                               |
| 829618566 | 427 | 374 | Firmicutes       | Enterococcus cecorum             | 6 Bacteria,Firmicutes,Bacilli,Lactobacillales,Enterococcaceae,Enterococcus,Enterococcus cecorum                                                              |
| 917001966 | 427 | 375 | Firmicutes       | Selenomonas sp. FC4001           | 3 Bacteria,Firmicutes,Negativicutes,Selenomonadales,Veillonellaceae,Selenomonas,Selenomonas sp. FC4001                                                       |
| 504964918 | 426 | 376 | Cyanobacteria    | Oscillatoria acuminata           | 3 Bacteria,Cyanobacteria,Oscillatorioophycidae,Oscillatoriales,Oscillatoria,Oscillatoria acuminata                                                           |
| 505041099 | 426 | 377 | Cyanobacteria    | Dactylococcopsis salina          | 7 Bacteria,Cyanobacteria,Oscillatorioophycidae,Chroococcales,Dactylococcopsis,Dactylococcopsis salina                                                        |
| 518326274 | 426 | 378 | Cyanobacteria    | Calothrix sp. PCC 7103           | 6 Bacteria,Cyanobacteria,Nostocales,Rivulariaceae,Calothrix,Calothrix sp. PCC 7103                                                                           |
| 521982550 | 426 | 379 | Chlamydiae/Verru | Verrucomicrobium sp. 3C          | 4 Bacteria,Chlamydiae/Verrucomicrobia group,Verrucomicrobia,Verrucomicrobiae,Verrucomicrobiales,Verrucomicrobiaceae,Verrucomicrobium,Verrucomicrobium sp. 3C |
| 657931854 | 426 | 380 | Cyanobacteria    | [Scytonema hofmanni] UTEX B 1581 | 10 Bacteria,Cyanobacteria,Nostocales,Microchaetaceae,Tolypothrix,[Scytonema hofmanni] UTEX B 1581                                                            |
| 737839666 | 426 | 381 | Proteobacteria   | Cupriavidus basilensis           | 1 Bacteria,Proteobacteria,Betaproteobacteria,Burkholderiales,Burkholderiaceae,Cupriavidus,Cupriavidus basilensis                                             |
| 749573752 | 426 | 382 | Proteobacteria   | Geoalkalibacter subterraneus     | 3 Bacteria,Proteobacteria,delta/epsilon subdivisions,Deltaproteobacteria,Desulfuromonadales,Geobacteraceae,Geoalkalibacter,Geoalkalibacter subterraneus      |
| 808795150 | 426 | 383 | Cyanobacteria    | Limnoraphis robusta              | 9 Bacteria,Cyanobacteria,Oscillatorioophycidae,Oscillatoriales,Limnoraphis,Limnoraphis robusta                                                               |
| 339834277 | 425 | 384 | Proteobacteria   | Acidithiobacillus sp. GGI-221    | 3 Bacteria,Proteobacteria,Gammaproteobacteria,Acidithiobacillales,Acidithiobacillaceae,Acidithiobacillus,Acidithiobacillus sp. GGI-221                       |
| 495462176 | 425 | 385 | Cyanobacteria    | Moorea producens                 | 19 Bacteria,Cyanobacteria,Oscillatorioophycidae,Oscillatoriales,Moorea,Moorea producens                                                                      |
| 503198332 | 425 | 386 | Firmicutes       | Caldicellulosiruptor             | 1 Bacteria,Firmicutes,Clostridia,Thermoanaerobacterales,Thermoanaerobacterales Family III. Incertae Sedis,Caldicellulosiruptor                               |
| 504938402 | 425 | 387 | Cyanobacteria    | Synechococcus sp. PCC 6312       | 1 Bacteria,Cyanobacteria,Oscillatorioophycidae,Chroococcales,Synechococcus,Synechococcus sp. PCC 6312                                                        |
| 517887110 | 425 | 388 | Actinobacteria   | Streptomyces prunicolor          | 1 Bacteria,Actinobacteria,Actinobacteria,Streptomycetales,Streptomycetaceae,Streptomyces,Streptomyces prunicolor                                             |
| 652400688 | 425 | 389 | Cyanobacteria    | Planktothrix prolifica           | 3 Bacteria,Cyanobacteria,Oscillatorioophycidae,Oscillatoriales,Planktothrix,Planktothrix prolifica                                                           |
| 751564179 | 425 | 390 | Cyanobacteria    | Tolypothrix campylonemoides      | 6 Bacteria,Cyanobacteria,Nostocales,Microchaetaceae,Tolypothrix,Tolypothrix campylonemoides                                                                  |
| 751565661 | 425 | 391 | Cyanobacteria    | Tolypothrix campylonemoides      | 6 Bacteria,Cyanobacteria,Nostocales,Microchaetaceae,Tolypothrix,Tolypothrix campylonemoides                                                                  |

|           |     |     |                |                                  |                                                                                                                                                              |
|-----------|-----|-----|----------------|----------------------------------|--------------------------------------------------------------------------------------------------------------------------------------------------------------|
| 759990428 | 425 | 392 | Actinobacteria | Streptomyces xylophagus          | Bacteria,Actinobacteria,Actinobacteria,Streptomycetales,Streptomycetaceae,Streptomyces,Streptomyces xylophagus                                               |
| 771515678 | 425 | 393 | Firmicutes     | Caldicellulosiruptor sp. Rt8.B8  | Bacteria,Firmicutes,Clostridia,Thermoanaerobacterales,Thermoanaerobacterales Family III. Incertae Sedis,Caldicellulosiruptor,Caldicellulosiruptor sp. Rt8.B8 |
| 808794842 | 425 | 394 | Cyanobacteria  | Limnoraphis robusta              | Bacteria,Cyanobacteria,Oscillatoriothycidae,Oscillatoriales,Limnoraphis,Limnoraphis robusta                                                                  |
| 917397795 | 425 | 395 | Firmicutes     | Lactobacillus composti           | Bacteria,Firmicutes,Bacilli,Lactobacillales,Lactobacillaceae,Lactobacillus,Lactobacillus composti                                                            |
| 291529631 | 424 | 396 | Firmicutes     | Eubacterium rectale M104/1       | Bacteria,Firmicutes,Clostridia,Clostridiales,Eubacteriaceae,Eubacterium,Eubacterium rectale,Eubacterium rectale M104/1                                       |
| 493558269 | 424 | 397 | Cyanobacteria  | Xenococcus sp. PCC 7305          | Bacteria,Cyanobacteria,Pleurocapsales,Xenococcus,Xenococcus sp. PCC 7305                                                                                     |
| 496658465 | 424 | 398 | Firmicutes     | Coprobacillus sp. 3_3_56FAA      | Bacteria,Firmicutes,Erysipelotrichia,Erysipelotrichales,Erysipelotrichaceae,Coprobacillus,Coprobacillus sp. 3_3_56FAA                                        |
| 501355452 | 424 | 399 | Proteobacteria | Acidithiobacillus caldus         | Bacteria,Proteobacteria,Gammaproteobacteria,Acidithiobacillales,Acidithiobacillaceae,Acidithiobacillus,Acidithiobacillus caldus                              |
| 503100072 | 424 | 400 | Cyanobacteria  | Cyanothece sp. PCC 7822          | Bacteria,Cyanobacteria,Oscillatoriothycidae,Chroococcales,Cyanothece,Cyanothece sp. PCC 7822                                                                 |
| 504891042 | 424 | 401 | Cyanobacteria  | Anabaena sp. 90                  | Bacteria,Cyanobacteria,Nostocales,Nostocaceae,Anabaena,Anabaena sp. 90                                                                                       |
| 504975991 | 424 | 402 | Cyanobacteria  | Chroococciopsis thermalis        | Bacteria,Cyanobacteria,Pleurocapsales,Chroococciopsis,Chroococciopsis thermalis                                                                              |
| 504975996 | 424 | 403 | Cyanobacteria  | Chroococciopsis thermalis        | Bacteria,Cyanobacteria,Pleurocapsales,Chroococciopsis,Chroococciopsis thermalis                                                                              |
| 504992576 | 424 | 404 | Cyanobacteria  | Oscillatoria nigro-viridis       | Bacteria,Cyanobacteria,Oscillatoriothycidae,Oscillatoriales,Oscillatoria,Oscillatoria nigro-viridis                                                          |
| 505015454 | 424 | 405 | Cyanobacteria  | Crinalium epipsammum             | Bacteria,Cyanobacteria,Oscillatoriothycidae,Oscillatoriales,Crinalium,Crinalium epipsammum                                                                   |
| 647307155 | 424 | 406 | Firmicutes     | Caldicoprobacter oshimai         | Bacteria,Firmicutes,Clostridia,Clostridiales,Caldicoprobacteraceae,Caldicoprobacter,Caldicoprobacter oshimai                                                 |
| 647308279 | 424 | 407 | Firmicutes     | Caldicoprobacter oshimai         | Bacteria,Firmicutes,Clostridia,Clostridiales,Caldicoprobacteraceae,Caldicoprobacter,Caldicoprobacter oshimai                                                 |
| 654353688 | 424 | 408 | Cyanobacteria  | Mastigocoleus testarum           | Bacteria,Cyanobacteria,Stigonematales,Mastigocoleus,Mastigocoleus testarum                                                                                   |
| 657936925 | 424 | 409 | Cyanobacteria  | [Scytonema hofmanni] UTEX B 1581 | Bacteria,Cyanobacteria,Nostocales,Microchaetaceae,Tolypothrix,[Scytonema hofmanni] UTEX B 1581                                                               |
| 751568033 | 424 | 410 | Cyanobacteria  | Tolypothrix campylonemoides      | Bacteria,Cyanobacteria,Nostocales,Microchaetaceae,Tolypothrix,Tolypothrix campylonemoides                                                                    |
| 769148495 | 424 | 411 | Firmicutes     | Anaerostipes hadrus              | Bacteria,Firmicutes,Clostridia,Clostridiales,Lachnospiraceae,Anaerostipes,Anaerostipes hadrus                                                                |

|           |     |     |                |                                        |                                                                                                                                                               |
|-----------|-----|-----|----------------|----------------------------------------|---------------------------------------------------------------------------------------------------------------------------------------------------------------|
| 494595516 | 423 | 412 | Cyanobacteria  | Kamptonema                             | Bacteria,Cyanobacteria,Oscillatoriophycid<br>3 eae,Oscillatoriales,Kamptonema                                                                                 |
| 494595821 | 423 | 413 | Cyanobacteria  | Kamptonema                             | Bacteria,Cyanobacteria,Oscillatoriophycid<br>3 eae,Oscillatoriales,Kamptonema                                                                                 |
| 495466012 | 423 | 414 | Cyanobacteria  | Moorea producents                      | Bacteria,Cyanobacteria,Oscillatoriophycid<br>eae,Oscillatoriales,Moorea,Moorea<br>19 producents                                                               |
| 501575717 | 423 | 415 | Thermotogae    | Thermosipho africanus                  | Bacteria,Thermotogae,Thermotogae,Ther<br>motogales,Fervidobacteriaceae,Thermosip<br>1 ho,Thermosipho africanus                                                |
| 516255251 | 423 | 416 | Cyanobacteria  | Geitlerinema sp. PCC<br>7105           | Bacteria,Cyanobacteria,Oscillatoriophycid<br>eae,Oscillatoriales,Geitlerinema,Geitlerine<br>18 ma sp. PCC 7105                                                |
| 530553011 | 423 | 417 | Euryarchaeota  | Thermoplasmatales<br>archaeon E-plasma | Archaea,Euryarchaeota,Thermoplasmata,<br>Thermoplasmatales,environmental<br>1 plasma<br>samples,Thermoplasmatales archaeon E-                                 |
| 657931856 | 423 | 418 | Cyanobacteria  | [Scytonema hofmanni]<br>UTEX B 1581    | Bacteria,Cyanobacteria,Nostocales,Microc<br>haetaceae,Tolypothrix,[Scytonema<br>10 hofmanni] UTEX B 1581                                                      |
| 740261246 | 423 | 419 | Cyanobacteria  | Tolypothrix bouteillei                 | Bacteria,Cyanobacteria,Nostocales,Microc<br>haetaceae,Tolypothrix,Tolypothrix<br>9 bouteillei                                                                 |
| 489446257 | 422 | 420 | Firmicutes     | Bacillus methanolicus                  | Bacteria,Firmicutes,Bacilli,Bacillales,Bacill<br>1 aceae,Bacillus,Bacillus methanolicus                                                                       |
| 501164742 | 422 | 421 | Thermotogae    | Petrotoga mobilis                      | Bacteria,Thermotogae,Thermotogae,Petro<br>togales,Petrotogaceae,Petrotoga,Petrotog<br>3 a mobilis                                                             |
| 664071344 | 422 | 422 | Actinobacteria | Streptomyces<br>fulvoviolaceus         | Bacteria,Actinobacteria,Actinobacteria,Str<br>eptomycetales,Streptomycetaceae,Strept<br>3 omyces,Streptomyces fulvoviolaceus                                  |
| 739495030 | 422 | 423 | Firmicutes     | Selenomonas sp. FC4001                 | Bacteria,Firmicutes,Negativicutes,Seleno<br>monadales,Veillonellaceae,Selenomonas,S<br>3 elenomonas sp. FC4001                                                |
| 916618137 | 422 | 424 | Firmicutes     | Lactobacillus harbinensis              | Bacteria,Firmicutes,Bacilli,Lactobacillales,L<br>actobacillaceae,Lactobacillus,Lactobacillus<br>1 harbinensis                                                 |
| 736402181 | 421 | 425 | Firmicutes     | Clostridiales bacterium<br>DRI-13      | Bacteria,Firmicutes,Clostridia,Clostridiales<br>,unclassified Clostridiales,unclassified<br>Clostridiales (miscellaneous),Clostridiales<br>4 bacterium DRI-13 |
| 499649188 | 420 | 426 | Proteobacteria | Pseudoalteromonas<br>haloplanktis      | Bacteria,Proteobacteria,Gammaproteobac<br>teria,Alteromonadales,Pseudoalteromona<br>daceae,Pseudoalteromonas,Pseudoaltero<br>1 monas haloplanktis             |
| 495460520 | 419 | 427 | Cyanobacteria  | Moorea producents                      | Bacteria,Cyanobacteria,Oscillatoriophycid<br>eae,Oscillatoriales,Moorea,Moorea<br>19 producents                                                               |
| 495464380 | 419 | 428 | Cyanobacteria  | Moorea producents                      | Bacteria,Cyanobacteria,Oscillatoriophycid<br>eae,Oscillatoriales,Moorea,Moorea<br>19 producents                                                               |
| 497357338 | 419 | 429 | Firmicutes     | Paenibacillus                          | Bacteria,Firmicutes,Bacilli,Bacillales,Paeni<br>1 bacillaceae,Paenibacillus                                                                                   |
| 505140419 | 419 | 430 | Firmicutes     | Halobacteroides<br>halobius            | Bacteria,Firmicutes,Clostridia,Halanaerobi<br>ales,Halobacteroidaceae,Halobacteroides,<br>3 Halobacteroides halobius                                          |
| 545380023 | 419 | 431 | Firmicutes     | Aneurinibacillus<br>aneurinilyticus    | Bacteria,Firmicutes,Bacilli,Bacillales,Paeni<br>bacillaceae,Aneurinibacillus<br>group,Aneurinibacillus,Aneurinibacillus<br>1 aneurinilyticus                  |

|           |     |     |                |                                    |                                                                                                                                                                            |
|-----------|-----|-----|----------------|------------------------------------|----------------------------------------------------------------------------------------------------------------------------------------------------------------------------|
| 551011564 | 419 | 432 | Firmicutes     | Butyrivibrio fibrisolvens          | Bacteria,Firmicutes,Clostridia,Clostridiales ,Lachnospiraceae,Butyrivibrio,Butyrivibrio<br>1 fibrisolvens                                                                  |
| 759011080 | 419 | 433 | Firmicutes     | Aneurinibacillus migulanus         | Bacteria,Firmicutes,Bacilli,Bacillales,Paeni bacillaceae,Aneurinibacillus<br>group,Aneurinibacillus,Aneurinibacillus<br>2 migulanus                                        |
| 503042356 | 418 | 434 | Firmicutes     | Acetohalobium arabaticum           | Bacteria,Firmicutes,Clostridia,Halanaerobi ales,Halobacteroidaceae,Acetohalobium,A<br>4 cetohalobium arabaticum                                                            |
| 504987354 | 418 | 435 | Cyanobacteria  | Oscillatoria nigro-viridis         | Bacteria,Cyanobacteria,Oscillatoriohyphid eae,Oscillatoriales,Oscillatoria,Oscillatoria<br>4 nigro-viridis                                                                 |
| 521044455 | 418 | 436 | Firmicutes     | Sulfobacillus thermosulfidooxidans | Bacteria,Firmicutes,Clostridia,Clostridiales ,Clostridiales incertae sedis,Clostridiales Family XVII. Incertae Sedis,Sulfobacillus,Sulfobacillus<br>4 thermosulfidooxidans |
| 657218740 | 418 | 437 | Firmicutes     | Exiguobacterium oxidotolerans      | Bacteria,Firmicutes,Bacilli,Bacillales,Bacill ales incertae sedis,Bacillales Family XII. Incertae Sedis,Exiguobacterium,Exiguobacterium<br>1 oxidotolerans                 |
| 495197893 | 417 | 438 | Chloroflexi    | Ktedonobacter racemifer            | Bacteria,Chloroflexi,Ktedonobacteria,Kted onobacterales,Ktedonobacteraceae,Ktedo<br>52 nobacter,Ktedonobacter racemifer                                                    |
| 502938756 | 417 | 439 | Firmicutes     | [Bacillus] selenitireducens        | Bacteria,Firmicutes,Bacilli,Bacillales,Sporo lactobacillaceae,unclassified<br>Sporolactobacillaceae,[Bacillus]<br>1 selenitireducens                                       |
| 503769081 | 417 | 440 | Proteobacteria | Acidithiobacillus caldus           | Bacteria,Proteobacteria,Gammaproteobac teria,Acidithiobacillales,Acidithiobacillacea<br>3 e,Acidithiobacillus,Acidithiobacillus caldus                                     |
| 517533367 | 417 | 441 | Firmicutes     | Anaeromusa acidaminophila          | Bacteria,Firmicutes,Negativicutes,Seleno monadales,Veillonellaceae,Anaeromusa,A<br>1 naeromusa acidaminophila                                                              |
| 737452652 | 415 | 442 | Firmicutes     | Bacillus sp. UNC322MFChir4.1       | Bacteria,Firmicutes,Bacilli,Bacillales,Bacill aceae,Bacillus,Bacillus sp.<br>1 UNC322MFChir4.1                                                                             |
| 406985418 | 414 | 443 | environmental  | san uncultured bacterium           | Bacteria,environmental<br>1 samples,uncultured bacterium                                                                                                                   |
| 657936249 | 414 | 444 | Cyanobacteria  | [Scytonema hofmanni] UTEX B 1581   | Bacteria,Cyanobacteria,Nostocales,Microc haetaceae,Tolypothrix,[Scytonema<br>10 hofmanni] UTEX B 1581                                                                      |
| 723287744 | 414 | 445 | Proteobacteria | Candidatus Thiomargarita nelsonii  | Bacteria,Proteobacteria,Gammaproteobac teria,Thiotrichales,Thiotrichaceae,Thiomar<br>10 garita,Candidatus Thiomargarita nelsonii                                           |
| 738422043 | 414 | 446 | Firmicutes     | Mitsuokella jalaludinii            | Bacteria,Firmicutes,Negativicutes,Seleno monadales,Veillonellaceae,Mitsuokella,Mi<br>1 tsuokella jalaludinii                                                               |
| 739503114 | 414 | 447 | Firmicutes     | Selenomonas ruminantium            | Bacteria,Firmicutes,Negativicutes,Seleno monadales,Veillonellaceae,Selenomonas,S<br>1 elenomonas ruminantium                                                               |
| 656255040 | 413 | 448 | Firmicutes     | Oribacterium sp. NK2B42            | Bacteria,Firmicutes,Clostridia,Clostridiales ,Lachnospiraceae,Oribacterium,Oribacteri<br>2 um sp. NK2B42                                                                   |
| 746610513 | 413 | 449 | Firmicutes     | Clostridium argentinense           | Bacteria,Firmicutes,Clostridia,Clostridiales ,Clostridiaceae,Clostridium,Clostridium<br>1 argentinense                                                                     |

|           |     |     |                        |                                      |                                                                                                                                                                      |
|-----------|-----|-----|------------------------|--------------------------------------|----------------------------------------------------------------------------------------------------------------------------------------------------------------------|
| 701167301 | 412 | 450 | Thermotogae            | Fervidobacterium islandicum          | Bacteria,Thermotogae,Thermotogae,Thermotogales,Fervidobacteriaceae,Fervidobacterium,Fervidobacterium islandicum                                                      |
| 769138930 | 412 | 451 | Firmicutes             | Oribacterium sp. FC2011              | Bacteria,Firmicutes,Clostridia,Clostridiales,Lachnospiraceae,Oribacterium,Oribacterium sp. FC2011                                                                    |
| 297555359 | 411 | 452 | Chloroflexi            | Ktedonobacter racemifer DSM 44963    | Bacteria,Chloroflexi,Ktedonobacteria,Ktedonobacteriales,Ktedonobacteraceae,Ktedonobacter,Ktedonobacter racemifer,Ktedonobacter racemifer DSM 44963                   |
| 521043078 | 411 | 453 | Firmicutes             | Sulfobacillus thermosulfidooxidans   | Bacteria,Firmicutes,Clostridia,Clostridiales,Clostridiales incertae sedis,Clostridiales Family XVII. Incertae Sedis,Sulfobacillus,Sulfobacillus thermosulfidooxidans |
| 734921353 | 411 | 454 | Firmicutes             | Desulfosporosinus sp. BICA1-9        | Bacteria,Firmicutes,Clostridia,Clostridiales,Peptococcaceae,Desulfosporosinus,Desulfosporosinus sp. BICA1-9                                                          |
| 734927385 | 411 | 455 | Firmicutes             | Desulfosporosinus sp. BICA1-9        | Bacteria,Firmicutes,Clostridia,Clostridiales,Peptococcaceae,Desulfosporosinus,Desulfosporosinus sp. BICA1-9                                                          |
| 736253160 | 411 | 456 | Firmicutes             | Bacillus sp. FJAT-14578              | Bacteria,Firmicutes,Bacilli,Bacillales,Bacillaceae,Bacillus,Bacillus sp. FJAT-14578                                                                                  |
| 518905354 | 410 | 457 | Firmicutes             | Bacillus sp. 123MFChir2              | Bacteria,Firmicutes,Bacilli,Bacillales,Bacillaceae,Bacillus,Bacillus sp. 123MFChir2                                                                                  |
| 518907476 | 410 | 458 | Firmicutes             | Bacillus sp. 123MFChir2              | Bacteria,Firmicutes,Bacilli,Bacillales,Bacillaceae,Bacillus,Bacillus sp. 123MFChir2                                                                                  |
| 524566620 | 410 | 459 | Firmicutes             | Firmicutes bacterium CAG:227         | Bacteria,Firmicutes,environmental samples,Firmicutes bacterium CAG:227                                                                                               |
| 764672287 | 410 | 460 | Cyanobacteria          | Mastigocladus laminosus              | Bacteria,Cyanobacteria,Stigonematales,Mastigocladus,Mastigocladus laminosus                                                                                          |
| 916839822 | 409 | 461 | Firmicutes             | Hungatella hathewayi                 | Bacteria,Firmicutes,Clostridia,Clostridiales,Clostridiaceae,Hungatella,Hungatella hathewayi                                                                          |
| 501427288 | 408 | 462 | Firmicutes             | Natranaerobius thermophilus          | Bacteria,Firmicutes,Clostridia,Natranaerobiales,Natranaerobiaceae,Natranaerobius,Natranaerobius thermophilus                                                         |
| 739163742 | 408 | 463 | Proteobacteria         | Psychromonas aquimarina              | Bacteria,Proteobacteria,Gammaproteobacteria,Alteromonadales,Psychromonadaceae,Psychromonas,Psychromonas aquimarina                                                   |
| 502959917 | 407 | 464 | Euryarchaeota          | Methanohalobium evestigatum          | Archaea,Euryarchaeota,Methanomicrobia,Methanosarcinales,Methanosarcinaceae,Methanohalobium,Methanohalobium evestigatum                                               |
| 495125196 | 406 | 465 | Bacteroidetes/Chlorobi | Bacteroides dorei                    | Bacteria,Bacteroidetes/Chlorobi group,Bacteroidetes,Bacteroidia,Bacteroidales,Bacteroidaceae,Bacteroides,Bacteroides dorei                                           |
| 769922130 | 404 | 466 | Cyanobacteria          | Chroococcales cyanobacterium CENA595 | Bacteria,Cyanobacteria,Oscillatoriophyceae,Chroococcales,unclassified Chroococcales,Chroococcales cyanobacterium CENA595                                             |
| 916282232 | 402 | 467 | Cyanobacteria          | Dactylococcopsis salina              | Bacteria,Cyanobacteria,Oscillatoriophyceae,Chroococcales,Dactylococcopsis,Dactylococcopsis salina                                                                    |

|           |     |     |                |                                         |                                                                                                                                                                |
|-----------|-----|-----|----------------|-----------------------------------------|----------------------------------------------------------------------------------------------------------------------------------------------------------------|
| 297547519 | 401 | 468 | Chloroflexi    | Ktedonobacter racemifer DSM 44963       | Bacteria,Chloroflexi,Ktedonobacteria,Ktedonobacterales,Ktedonobacteraceae,Ktedonobacter racemifer,Ktedonobacter racemifer DSM 44963                            |
| 517215449 | 400 | 469 | Proteobacteria | Marinobacter lipolyticus                | Bacteria,Proteobacteria,Gammaproteobacteria,Alteromonadales,Alteromonadaceae,Marinobacter,Marinobacter lipolyticus                                             |
| 769158866 | 400 | 470 | Firmicutes     | Oribacterium sp. NK2B42                 | Bacteria,Firmicutes,Clostridia,Clostridiales,Lachnospiraceae,Oribacterium,Oribacterium sp. NK2B42                                                              |
| 750641437 | 398 | 471 | Proteobacteria | SAR324 cluster bacterium JCVI-SC AAA005 | Bacteria,Proteobacteria,delta/epsilon subdivisions,Deltaproteobacteria,unclassified Deltaproteobacteria,SAR324 cluster,SAR324 cluster bacterium JCVI-SC AAA005 |
| 78499553  | 394 | 472 | Cyanobacteria  | Arthrospira platensis                   | Bacteria,Cyanobacteria,Oscillatoriophycideae,Oscillatoriales,Arthrospira,Arthrospira platensis                                                                 |
| 504963642 | 394 | 473 | Cyanobacteria  | Oscillatoria acuminata                  | Bacteria,Cyanobacteria,Oscillatoriophycideae,Oscillatoriales,Oscillatoria,Oscillatoria acuminata                                                               |
| 357260773 | 393 | 474 | Cyanobacteria  | Crocospaera watsonii WH 0003            | Bacteria,Cyanobacteria,Oscillatoriophycideae,Chroococcales,Crocospaera,Crocospaera watsonii,Crocospaera watsonii WH 0003                                       |
| 251772193 | 392 | 475 | Nitrospirae    | Leptospirillum ferrodiazotrophum        | Bacteria,Nitrospirae,Nitrospira,Nitrospirales,Nitrospiraceae,Leptospirillum,Leptospirillum sp. Group III,Leptospirillum ferrodiazotrophum                      |
| 657199754 | 391 | 476 | Cyanobacteria  | Acaryochloris sp. CCME 5410             | Bacteria,Cyanobacteria,Oscillatoriophycideae,Chroococcales,Acaryochloris,Acaryochloris sp. CCME 5410                                                           |
| 505011639 | 390 | 477 | Cyanobacteria  | Calothrix parietina                     | Bacteria,Cyanobacteria,Nostocales,Rivulariaceae,Calothrix,Calothrix parietina                                                                                  |
| 504963785 | 389 | 478 | Cyanobacteria  | Oscillatoria acuminata                  | Bacteria,Cyanobacteria,Oscillatoriophycideae,Oscillatoriales,Oscillatoria,Oscillatoria acuminata                                                               |
| 503587794 | 388 | 479 | Firmicutes     | Desulfotomaculum kuznetsovii            | Bacteria,Firmicutes,Clostridia,Clostridiales,Peptococcaceae,Desulfotomaculum,Desulfotomaculum kuznetsovii                                                      |
| 505037351 | 385 | 480 | Cyanobacteria  | Halothece sp. PCC 7418                  | Bacteria,Cyanobacteria,Oscillatoriophycideae,Chroococcales,Halothece                                                                                           |
| 518337458 | 382 | 481 | Cyanobacteria  | Pleurocapsa sp. PCC 7319                | Bacteria,Cyanobacteria,Pleurocapsales,Pleurocapsa,Pleurocapsa sp. PCC 7319                                                                                     |
| 763347217 | 381 | 482 | Cyanobacteria  | Coleofasciculus chthonoplastes          | Bacteria,Cyanobacteria,Oscillatoriophycideae,Oscillatoriales,Coleofasciculus,Coleofasciculus chthonoplastes                                                    |
| 910241426 | 381 | 483 | Cyanobacteria  | Tolypothrix bouteillei                  | Bacteria,Cyanobacteria,Nostocales,Microchaetaceae,Tolypothrix,Tolypothrix bouteillei                                                                           |
| 518326653 | 380 | 484 | Cyanobacteria  | Calothrix sp. PCC 7103                  | Bacteria,Cyanobacteria,Nostocales,Rivulariaceae,Calothrix,Calothrix sp. PCC 7103                                                                               |
| 494517852 | 379 | 485 | Cyanobacteria  | Crocospaera watsonii                    | Bacteria,Cyanobacteria,Oscillatoriophycideae,Chroococcales,Crocospaera,Crocospaera watsonii                                                                    |

|           |     |     |               |                                                             |    |                                                                                                                                                                                                              |
|-----------|-----|-----|---------------|-------------------------------------------------------------|----|--------------------------------------------------------------------------------------------------------------------------------------------------------------------------------------------------------------|
| 332351493 | 378 | 486 | Cyanobacteria | Moorea producens 3L                                         | 12 | Bacteria,Cyanobacteria,Oscillatoriophycid eae,Oscillatoriales,Moorea,Moorea producens,Moorea producens 3L                                                                                                    |
| 493504336 | 377 | 487 | Cyanobacteria | Synechococcus sp. PCC 7335                                  | 6  | Bacteria,Cyanobacteria,Oscillatoriophycid eae,Chroococcales,Synechococcus,Synechococcus sp. PCC 7335                                                                                                         |
| 751569099 | 376 | 488 | Cyanobacteria | Tolypothrix campylonemoides                                 | 6  | Bacteria,Cyanobacteria,Nostocales,Microchaetaceae,Tolypothrix,Tolypothrix campylonemoides                                                                                                                    |
| 915593086 | 374 | 489 | Cyanobacteria | Acaryochloris sp. CCME 5410                                 | 4  | Bacteria,Cyanobacteria,Oscillatoriophycid eae,Chroococcales,Acaryochloris,Acaryochloris sp. CCME 5410                                                                                                        |
| 332351757 | 373 | 490 | Cyanobacteria | Moorea producens 3L                                         | 12 | Bacteria,Cyanobacteria,Oscillatoriophycid eae,Oscillatoriales,Moorea,Moorea producens,Moorea producens 3L                                                                                                    |
| 503088683 | 373 | 491 | Cyanobacteria | Cyanothece sp. PCC 7822                                     | 8  | Bacteria,Cyanobacteria,Oscillatoriophycid eae,Chroococcales,Cyanothece,Cyanothece sp. PCC 7822                                                                                                               |
| 898219347 | 372 | 492 | Cyanobacteria | Limnoraphis robusta                                         | 9  | Bacteria,Cyanobacteria,Oscillatoriophycid eae,Oscillatoriales,Limnoraphis,Limnoraphis robusta                                                                                                                |
| 493500461 | 371 | 493 | Cyanobacteria | Synechococcus sp. PCC 7335                                  | 6  | Bacteria,Cyanobacteria,Oscillatoriophycid eae,Chroococcales,Synechococcus,Synechococcus sp. PCC 7335                                                                                                         |
| 504891808 | 371 | 494 | Cyanobacteria | Anabaena sp. 90                                             | 4  | Bacteria,Cyanobacteria,Nostocales,Nostocaceae,Anabaena,Anabaena sp. 90                                                                                                                                       |
| 515886569 | 371 | 495 | Cyanobacteria | Mastigocladopsis repens                                     | 4  | Bacteria,Cyanobacteria,Stigonematales,Mastigocladopsis,Mastigocladopsis repens                                                                                                                               |
| 516257744 | 371 | 496 | Cyanobacteria | Geitlerinema sp. PCC 7105                                   | 18 | Bacteria,Cyanobacteria,Oscillatoriophycid eae,Oscillatoriales,Geitlerinema,Geitlerinema sp. PCC 7105                                                                                                         |
| 740253778 | 371 | 497 | Cyanobacteria | Tolypothrix bouteillei                                      | 9  | Bacteria,Cyanobacteria,Nostocales,Microchaetaceae,Tolypothrix,Tolypothrix bouteillei                                                                                                                         |
| 300496752 | 370 | 498 | Firmicutes    | Lactobacillus delbrueckii subsp. bulgaricus PB2003/044-T3-4 | 1  | Bacteria,Firmicutes,Bacilli,Lactobacillales,Lactobacillaceae,Lactobacillus,Lactobacillus delbrueckii,Lactobacillus delbrueckii subsp. bulgaricus,Lactobacillus delbrueckii subsp. bulgaricus PB2003/044-T3-4 |
| 515389315 | 370 | 499 | Cyanobacteria | Chlorogloeopsis fritschii                                   | 2  | Bacteria,Cyanobacteria,Stigonematales,Chlorogloeopsis,Chlorogloeopsis fritschii                                                                                                                              |
| 518333149 | 370 | 500 | Cyanobacteria | Pleurocapsa sp. PCC 7319                                    | 2  | Bacteria,Cyanobacteria,Pleurocapsales,Pleurocapsa,Pleurocapsa sp. PCC 7319                                                                                                                                   |
| 653153939 | 370 | 501 | Cyanobacteria | Aphanizomenon flos-aquae                                    | 4  | Bacteria,Cyanobacteria,Nostocales,Nostocaceae,Aphanizomenon,Aphanizomenon flos-aquae                                                                                                                         |
| 755140659 | 370 | 502 | Cyanobacteria | Anabaena sp. PCC 7108                                       | 2  | Bacteria,Cyanobacteria,Nostocales,Nostocaceae,Anabaena,Anabaena sp. PCC 7108                                                                                                                                 |
| 493028331 | 368 | 503 | Cyanobacteria | Coleofasciculus chthonoplastes                              | 25 | Bacteria,Cyanobacteria,Oscillatoriophycid eae,Oscillatoriales,Coleofasciculus,Coleofasciculus chthonoplastes                                                                                                 |
| 493031658 | 368 | 504 | Cyanobacteria | Coleofasciculus chthonoplastes                              | 25 | Bacteria,Cyanobacteria,Oscillatoriophycid eae,Oscillatoriales,Coleofasciculus,Coleofasciculus chthonoplastes                                                                                                 |
| 493034793 | 368 | 505 | Cyanobacteria | Coleofasciculus chthonoplastes                              | 25 | Bacteria,Cyanobacteria,Oscillatoriophycid eae,Oscillatoriales,Coleofasciculus,Coleofasciculus chthonoplastes                                                                                                 |



|           |     |     |                |                                      |                                                                                                                                                   |
|-----------|-----|-----|----------------|--------------------------------------|---------------------------------------------------------------------------------------------------------------------------------------------------|
| 504995984 | 368 | 506 | Cyanobacteria  | Microcoleus sp. PCC 7113             | Bacteria,Cyanobacteria,Oscillatoriophycid eae,Oscillatoriales,Microcoleus,Microcoleus sp. PCC 7113                                                |
| 530560580 | 368 | 507 | Euryarchaeota  | Ferroplasma sp. Type II              | Archaea,Euryarchaeota,Thermoplasmata,Thermoplasmatales,Ferroplasmaceae,Ferroplasma,environmental<br>16 samples,Ferroplasma sp. Type II            |
| 759781475 | 367 | 508 | Actinobacteria | Streptomyces bingchenggensis         | Bacteria,Actinobacteria,Actinobacteria,Streptomycetales,Streptomycetaceae,Streptomyces,Streptomyces bingchenggensis                               |
| 428689568 | 366 | 509 | Cyanobacteria  | Halotheca sp. PCC 7418               | Bacteria,Cyanobacteria,Oscillatoriophycid eae,Chroococcales,Halotheca<br>3 cluster,Halotheca,Halotheca sp. PCC 7418                               |
| 657932748 | 366 | 510 | Cyanobacteria  | [Scytonema hofmanni] UTEX B 1581     | Bacteria,Cyanobacteria,Nostocales,Microchaetaceae,Tolypothrix,[Scytonema hofmanni] UTEX B 1581                                                    |
| 493574625 | 365 | 511 | Cyanobacteria  | Gloeocapsa sp. PCC 73106             | Bacteria,Cyanobacteria,Oscillatoriophycid eae,Chroococcales,Gloeocapsa,Gloeocapsa sp. PCC 73106                                                   |
| 493576687 | 365 | 512 | Cyanobacteria  | Gloeocapsa sp. PCC 73106             | Bacteria,Cyanobacteria,Oscillatoriophycid eae,Chroococcales,Gloeocapsa,Gloeocapsa sp. PCC 73106                                                   |
| 503085700 | 365 | 513 | Cyanobacteria  | Cyanothece sp. PCC 7822              | Bacteria,Cyanobacteria,Oscillatoriophycid eae,Chroococcales,Cyanothece,Cyanothece sp. PCC 7822                                                    |
| 505040939 | 365 | 514 | Cyanobacteria  | Dactylococcopsis salina              | Bacteria,Cyanobacteria,Oscillatoriophycid eae,Chroococcales,Dactylococcopsis,Dactylococcopsis salina                                              |
| 505041852 | 365 | 515 | Cyanobacteria  | Dactylococcopsis salina              | Bacteria,Cyanobacteria,Oscillatoriophycid eae,Chroococcales,Dactylococcopsis,Dactylococcopsis salina                                              |
| 505043997 | 365 | 516 | Cyanobacteria  | Dactylococcopsis salina              | Bacteria,Cyanobacteria,Oscillatoriophycid eae,Chroococcales,Dactylococcopsis,Dactylococcopsis salina                                              |
| 515389462 | 365 | 517 | Cyanobacteria  | Chlorogloeopsis fritschii            | Bacteria,Cyanobacteria,Stigonematales,Chlorogloeopsis,Chlorogloeopsis fritschii                                                                   |
| 648408069 | 365 | 518 | Cyanobacteria  | Prochlorothrix hollandica            | Bacteria,Cyanobacteria,Prochlorales,Prochlorothrixaceae,Prochlorothrix,Prochlorothrix hollandica                                                  |
| 652402791 | 365 | 519 | Cyanobacteria  | Planktothrix                         | Bacteria,Cyanobacteria,Oscillatoriophycid eae,Oscillatoriales,Planktothrix                                                                        |
| 723294073 | 365 | 520 | Proteobacteria | Candidatus Thiomargarita nelsonii    | Bacteria,Proteobacteria,Gammaproteobacteria,Thiotrichales,Thiotrichaceae,Thiomargarita,Candidatus Thiomargarita nelsonii                          |
| 505016981 | 364 | 521 | Cyanobacteria  | Crinalium epipsammum                 | Bacteria,Cyanobacteria,Oscillatoriophycid eae,Oscillatoriales,Crinalium,Crinalium epipsammum                                                      |
| 515887458 | 364 | 522 | Cyanobacteria  | Mastigocladopsis repens              | Bacteria,Cyanobacteria,Stigonematales,Mastigocladopsis,Mastigocladopsis repens                                                                    |
| 530558821 | 364 | 523 | Euryarchaeota  | Ferroplasma sp. Type II              | Archaea,Euryarchaeota,Thermoplasmata,Thermoplasmatales,Ferroplasmaceae,Ferroplasma,environmental<br>16 samples,Ferroplasma sp. Type II            |
| 530928824 | 364 | 524 | Nitrospirae    | Leptospirillum sp. Group IV 'UBA BS' | Bacteria,Nitrospirae,Nitrospira,Nitrospirales,Nitrospiraceae,Leptospirillum,Leptospirillum sp. Group IV,Leptospirillum sp.<br>8 Group IV 'UBA BS' |

|           |     |     |                |                                   |                                                                                                                                      |
|-----------|-----|-----|----------------|-----------------------------------|--------------------------------------------------------------------------------------------------------------------------------------|
| 764673423 | 364 | 525 | Cyanobacteria  | Mastigocladus laminosus           | Bacteria,Cyanobacteria,Stigonematales,Mastigocladus,Mastigocladus laminosus                                                          |
| 764953316 | 364 | 526 | Cyanobacteria  | Nostoc sp. PCC 7120               | Bacteria,Cyanobacteria,Nostocales,Nostocaceae,Nostoc,Nostoc sp. PCC 7120                                                             |
| 917147043 | 364 | 527 | Actinobacteria | Streptosporangium amethystogenes  | Bacteria,Actinobacteria,Actinobacteria,Streptosporangiales,Streptosporangiaceae,Streptosporangium,Streptosporangium amethystogenes   |
| 495462462 | 360 | 528 | Cyanobacteria  | Moorea producens                  | Bacteria,Cyanobacteria,Oscillatoriophyceae,Oscillatoriales,Moorea,Moorea producens                                                   |
| 723290517 | 360 | 529 | Proteobacteria | Candidatus Thiomargarita nelsonii | Bacteria,Proteobacteria,Gammaproteobacteria,Thiotrichales,Thiotrichaceae,Thiomargarita,Candidatus Thiomargarita nelsonii             |
| 917665054 | 359 | 530 | Firmicutes     | Thermincola ferriacetica          | Bacteria,Firmicutes,Clostridia,Clostridiales,Peptococcaceae,Thermincola,Thermincola ferriacetica                                     |
| 654348331 | 358 | 531 | Cyanobacteria  | Mastigocoleus testarum            | Bacteria,Cyanobacteria,Stigonematales,Mastigocoleus,Mastigocoleus testarum                                                           |
| 908671001 | 358 | 532 | Cyanobacteria  | Cyanothece sp. PCC 7822           | Bacteria,Cyanobacteria,Oscillatoriophyceae,Chroococcales,Cyanothece,Cyanothece sp. PCC 7822                                          |
| 653151509 | 357 | 533 | Cyanobacteria  | Aphanizomenon flos-aquae          | Bacteria,Cyanobacteria,Nostocales,Nostocaceae,Aphanizomenon,Aphanizomenon flos-aquae                                                 |
| 654348422 | 357 | 534 | Cyanobacteria  | Mastigocoleus testarum            | Bacteria,Cyanobacteria,Stigonematales,Mastigocoleus,Mastigocoleus testarum                                                           |
| 703193438 | 357 | 535 | Cyanobacteria  | Spirulina subsalsa                | Bacteria,Cyanobacteria,Oscillatoriophyceae,Oscillatoriales,Spirulina,Spirulina subsalsa                                              |
| 530558823 | 355 | 536 | Euryarchaeota  | Ferroplasma sp. Type II           | Archaea,Euryarchaeota,Thermoplasmata,Thermoplasmatales,Ferroplasmaceae,Ferroplasma,environmental samples,Ferroplasma sp. Type II     |
| 654100737 | 353 | 537 | Firmicutes     | Desulfoviregula thermocuniculi    | Bacteria,Firmicutes,Clostridia,Thermoanaerobacterales,Thermoanaerobacteraceae,Desulfoviregula,Desulfoviregula thermocuniculi         |
| 751571642 | 352 | 538 | Cyanobacteria  | Tolypothrix campylonemoides       | Bacteria,Cyanobacteria,Nostocales,Microchaetaceae,Tolypothrix,Tolypothrix campylonemoides                                            |
| 723281300 | 351 | 539 | Proteobacteria | Candidatus Thiomargarita nelsonii | Bacteria,Proteobacteria,Gammaproteobacteria,Thiotrichales,Thiotrichaceae,Thiomargarita,Candidatus Thiomargarita nelsonii             |
| 737210796 | 351 | 540 | Proteobacteria | Acidithiobacillus ferrivorans     | Bacteria,Proteobacteria,Gammaproteobacteria,Acidithiobacillales,Acidithiobacillaceae,Acidithiobacillus,Acidithiobacillus ferrivorans |
| 915329395 | 351 | 541 | Cyanobacteria  | Synechococcus sp. PCC 7335        | Bacteria,Cyanobacteria,Oscillatoriophyceae,Chroococcales,Synechococcus,Synechococcus sp. PCC 7335                                    |
| 517015347 | 349 | 542 | Firmicutes     | Desulfitobacterium hafniense      | Bacteria,Firmicutes,Clostridia,Clostridiales,Peptococcaceae,Desulfitobacterium,Desulfitobacterium hafniense                          |
| 516359258 | 348 | 543 | Cyanobacteria  | Scytonema hofmanni                | Bacteria,Cyanobacteria,Nostocales,Scytonemataceae,Scytonema,Scytonema hofmanni                                                       |
| 738590047 | 344 | 544 | Proteobacteria | Nitrosococcus oceani              | Bacteria,Proteobacteria,Gammaproteobacteria,Chromatiales,Chromatiaceae,Nitrosococcus,Nitrosococcus oceani                            |

|           |     |     |                     |                                              |                                                                                                                                                                                     |
|-----------|-----|-----|---------------------|----------------------------------------------|-------------------------------------------------------------------------------------------------------------------------------------------------------------------------------------|
| 740235865 | 344 | 545 | Cyanobacteria       | Tolypothrix bouteillei                       | 9 bouteillei<br>Bacteria,unclassified                                                                                                                                               |
| 551153509 | 343 | 546 | unclassified Bacter | Poribacteria bacterium WGA-3G                | Bacteria,Poribacteria,Poribacteria<br>1 bacterium WGA-3G                                                                                                                            |
| 917662527 | 343 | 547 | Firmicutes          | Thermincola ferriacetica                     | Bacteria,Firmicutes,Clostridia,Clostridiales<br>,Peptococcaceae,Thermincola,Thermincol<br>3 a ferriacetica                                                                          |
| 805384334 | 342 | 548 | Euryarchaeota       | Methanosarcina horonobensis HB-1 = JCM 15518 | Archaea,Euryarchaeota,Methanomicrobia,<br>Methanosarcinales,Methanosarcinaceae,<br>Methanosarcina,Methanosarcina<br>horonobensis,Methanosarcina<br>2 horonobensis HB-1 = JCM 15518  |
| 515861153 | 341 | 549 | Cyanobacteria       | Leptolyngbya boryana                         | Bacteria,Cyanobacteria,Oscillatoriophycid<br>eae,Oscillatoriales,Leptolyngbya,Leptolyng<br>1 bya boryana                                                                            |
| 889965630 | 341 | 550 | Cyanobacteria       | Scytonema tolypothrichoides                  | Bacteria,Cyanobacteria,Nostocales,Scyton<br>emataceae,Scytonema,Scytonema<br>2 tolypothrichoides                                                                                    |
| 404657552 | 340 | 551 | Proteobacteria      | Sutterella wadsworthensis 2_1_59BFAA         | Bacteria,Proteobacteria,Betaproteobacter<br>ia,Burkholderiales,Sutterellaceae,Sutterell<br>a,Sutterella wadsworthensis,Sutterella<br>6 wadsworthensis 2_1_59BFAA                    |
| 517015328 | 340 | 552 | Firmicutes          | Desulfitobacterium hafniense                 | Bacteria,Firmicutes,Clostridia,Clostridiales<br>,Peptococcaceae,Desulfitobacterium,Desu<br>3 lfitobacterium hafniense                                                               |
| 517015320 | 339 | 553 | Firmicutes          | Desulfitobacterium hafniense                 | Bacteria,Firmicutes,Clostridia,Clostridiales<br>,Peptococcaceae,Desulfitobacterium,Desu<br>3 lfitobacterium hafniense                                                               |
| 521041825 | 339 | 554 | Firmicutes          | Sulfobacillus thermosulfidooxidans           | Bacteria,Firmicutes,Clostridia,Clostridiales<br>,Clostridiales incertae sedis,Clostridiales<br>Family XVII. Incertae<br>Sedis,Sulfobacillus,Sulfobacillus<br>4 thermosulfidooxidans |
| 521051118 | 339 | 555 | unclassified Bacter | Candidatus Poribacteria sp. WGA-4E           | Bacteria,unclassified<br>Bacteria,Poribacteria,Candidatus<br>1 Poribacteria sp. WGA-4E                                                                                              |
| 503167640 | 338 | 556 | Firmicutes          | Caldicellulosiruptor hydrothermalis          | Bacteria,Firmicutes,Clostridia,Thermoana<br>erobacterales,Thermoanaerobacterales<br>Family III. Incertae<br>Sedis,Caldicellulosiruptor,Caldicellulosirup<br>2 tor hydrothermalis    |
| 851307650 | 338 | 557 | Euryarchaeota       | Methanosarcina sp. 2.H.A.1B.4                | Archaea,Euryarchaeota,Methanomicrobia,<br>Methanosarcinales,Methanosarcinaceae,<br>Methanosarcina,Methanosarcina sp.<br>4 2.H.A.1B.4                                                |
| 428001463 | 337 | 558 | Cyanobacteria       | Oscillatoria acuminata PCC 6304              | Bacteria,Cyanobacteria,Oscillatoriophycid<br>eae,Oscillatoriales,Oscillatoria,Oscillatoria<br>acuminata,Oscillatoria acuminata PCC<br>1 6304                                        |
| 495475865 | 337 | 559 | Cyanobacteria       | Microcystis sp. T1-4                         | Bacteria,Cyanobacteria,Oscillatoriophycid<br>eae,Chroococcales,Microcystis,Microcystis<br>2 sp. T1-4                                                                                |
| 496140048 | 336 | 560 | Proteobacteria      | Parasutterella excrementihominis             | Bacteria,Proteobacteria,Betaproteobacter<br>ia,Burkholderiales,Sutterellaceae,Parasutt<br>4 erella,Parasutterella excrementihominis                                                 |
| 516257779 | 336 | 561 | Cyanobacteria       | Geitlerinema sp. PCC 7105                    | Bacteria,Cyanobacteria,Oscillatoriophycid<br>eae,Oscillatoriales,Geitlerinema,Geitlerine<br>18 ma sp. PCC 7105                                                                      |

|           |     |     |                |                                                    |                                                                                                                                                                                                                                                                                                                    |
|-----------|-----|-----|----------------|----------------------------------------------------|--------------------------------------------------------------------------------------------------------------------------------------------------------------------------------------------------------------------------------------------------------------------------------------------------------------------|
| 588475866 | 335 | 562 | Firmicutes     | Lactobacillus composti<br>DSM 18527 = JCM<br>14202 | Bacteria,Firmicutes,Bacilli,Lactobacillales,L<br>actobacillaceae,Lactobacillus,Lactobacillus<br>composti,Lactobacillus composti DSM<br>3 18527 = JCM 14202                                                                                                                                                         |
| 919167216 | 333 | 563 | Euryarchaeota  | Methanosarcina<br>lacustris                        | Archaea,Euryarchaeota,Methanomicrobia,<br>Methanosarcinales,Methanosarcinaceae,<br>60 Methanosarcina,Methanosarcina lacustris<br>Bacteria,Cyanobacteria,Oscillatoriophycid<br>eae,Oscillatoriales,Moorea,Moorea                                                                                                    |
| 332349884 | 332 | 564 | Cyanobacteria  | Moorea producens 3L                                | 12 producens,Moorea producens 3L<br>Bacteria,Cyanobacteria,Nostocales,Nostoc<br>aceae,Dolichospermum,Dolichospermum                                                                                                                                                                                                |
| 654624416 | 331 | 565 | Cyanobacteria  | Dolichospermum<br>circinale                        | 2 circinale                                                                                                                                                                                                                                                                                                        |
| 196178704 | 327 | 566 | Cyanobacteria  | Coleofasciculus<br>chthonoplastes PCC<br>7420      | Bacteria,Cyanobacteria,Oscillatoriophycid<br>eae,Oscillatoriales,Coleofasciculus,Coleofa<br>sciculus chthonoplastes,Coleofasciculus<br>16 chthonoplastes PCC 7420                                                                                                                                                  |
| 736399397 | 326 | 567 | Firmicutes     | Clostridiales bacterium<br>DRI-13                  | Bacteria,Firmicutes,Clostridia,Clostridiales<br>,unclassified Clostridiales,unclassified<br>Clostridiales (miscellaneous),Clostridiales<br>4 bacterium DRI-13<br>Bacteria,Actinobacteria,Actinobacteria,Str<br>eptomycetales,Streptomycetaceae,Strept                                                              |
| 917128556 | 325 | 568 | Actinobacteria | Streptomyces                                       | 1 omyces                                                                                                                                                                                                                                                                                                           |
| 17135565  | 323 | 569 | Cyanobacteria  | Nostoc sp. PCC 7120                                | Bacteria,Cyanobacteria,Nostocales,Nostoc<br>3 aceae,Nostoc,Nostoc sp. PCC 7120<br>Bacteria,Cyanobacteria,Oscillatoriophycid<br>eae,Oscillatoriales,Limnoraphis,Limnoraph                                                                                                                                           |
| 898215951 | 323 | 570 | Cyanobacteria  | Limnoraphis robusta                                | 9 is robusta                                                                                                                                                                                                                                                                                                       |
| 917059029 | 322 | 571 | Firmicutes     | Erysipelotrichaceae<br>bacterium NK3D112           | Bacteria,Firmicutes,Erysipelotrichia,Erysip<br>elotrichales,Erysipelotrichaceae,unclassifi<br>ed Erysipelotrichaceae,unclassified<br>Erysipelotrichaceae<br>(miscellaneous),Erysipelotrichaceae<br>1 bacterium NK3D112<br>Bacteria,Cyanobacteria,Oscillatoriophycid<br>eae,Oscillatoriales,Planktothrix,Planktothr |
| 750683094 | 321 | 572 | Cyanobacteria  | Planktothrix mougeotii                             | 3 ix mougeotii                                                                                                                                                                                                                                                                                                     |
| 490700480 | 318 | 573 | Firmicutes     | Lactobacillus salivarius                           | Bacteria,Firmicutes,Bacilli,Lactobacillales,L<br>actobacillaceae,Lactobacillus,Lactobacillus<br>11 salivarius                                                                                                                                                                                                      |
| 764667589 | 316 | 574 | Cyanobacteria  | Mastigocladus<br>laminosus                         | Bacteria,Cyanobacteria,Stigonematales,M<br>4 astigocladus,Mastigocladus laminosus                                                                                                                                                                                                                                  |
| 919167264 | 316 | 575 | Euryarchaeota  | Methanosarcina<br>lacustris                        | Archaea,Euryarchaeota,Methanomicrobia,<br>Methanosarcinales,Methanosarcinaceae,<br>60 Methanosarcina,Methanosarcina lacustris<br>Bacteria,Cyanobacteria,Oscillatoriophycid<br>eae,Oscillatoriales,Coleofasciculus,Coleofa                                                                                          |
| 763349201 | 313 | 576 | Cyanobacteria  | Coleofasciculus<br>chthonoplastes                  | 25 sciculus chthonoplastes<br>Bacteria,Cyanobacteria,Oscillatoriophycid<br>eae,Oscillatoriales,Arthrospira,Arthrospira                                                                                                                                                                                             |
| 737769353 | 312 | 577 | Cyanobacteria  | Arthrospira platensis                              | 20 platensis<br>Bacteria,Cyanobacteria,Oscillatoriophycid<br>eae,Oscillatoriales,Moorea,Moorea                                                                                                                                                                                                                     |
| 880798173 | 310 | 578 | Cyanobacteria  | Moorea bouillonii PNG5-<br>198                     | 2 bouillonii,Moorea bouillonii PNG5-198<br>Bacteria,Firmicutes,Clostridia,Clostridiales                                                                                                                                                                                                                            |
| 516757976 | 307 | 579 | Firmicutes     | Desulfurispora<br>thermophila                      | ,Peptococcaceae,Desulfurispora,Desulfuris<br>1 pora thermophila                                                                                                                                                                                                                                                    |

|           |     |     |                |                                                  |                                                                                                                                                                                                                               |
|-----------|-----|-----|----------------|--------------------------------------------------|-------------------------------------------------------------------------------------------------------------------------------------------------------------------------------------------------------------------------------|
| 727076115 | 307 | 580 | Firmicutes     | Anoxybacillus sp. BCO1                           | Bacteria,Firmicutes,Bacilli,Bacillales,Bacillaceae,Anoxybacillus,Anoxybacillus sp.<br>1 BCO1                                                                                                                                  |
| 917359539 | 307 | 581 | Firmicutes     | Clostridiales bacterium DRI-13                   | Bacteria,Firmicutes,Clostridia,Clostridiales,unclassified Clostridiales,unclassified Clostridiales (miscellaneous),Clostridiales<br>4 bacterium DRI-13                                                                        |
| 737120430 | 305 | 582 | Firmicutes     | Desulfoviregula thermocuniculi                   | Bacteria,Firmicutes,Clostridia,Thermoanaerobacterales,Thermoanaerobacteraceae,Desulfoviregula,Desulfoviregula<br>2 thermocuniculi                                                                                             |
| 919167308 | 304 | 583 | Euryarchaeota  | Methanosarcina lacustris                         | Archaea,Euryarchaeota,Methanomicrobia,Methanosarcinales,Methanosarcinaceae,<br>60 Methanosarcina,Methanosarcina lacustris                                                                                                     |
| 763282104 | 303 | 584 | Proteobacteria | Succinimonas amylolytica                         | Bacteria,Proteobacteria,Gammaproteobacteria,Aeromonadales,Succinivibrionaceae,<br>1 Succinimonas,Succinimonas amylolytica                                                                                                     |
| 312281242 | 301 | 585 | Firmicutes     | Lactobacillus delbrueckii subsp. bulgaricus ND02 | Bacteria,Firmicutes,Bacilli,Lactobacillales,Lactobacillaceae,Lactobacillus,Lactobacillus delbrueckii,Lactobacillus delbrueckii subsp. bulgaricus,Lactobacillus delbrueckii subsp. bulgaricus ND02<br>1 subsp. bulgaricus ND02 |
| 763057626 | 300 | 586 | Cyanobacteria  | Planktothrix prolifica                           | Bacteria,Cyanobacteria,Oscillatoriothrixaceae,Oscillatoriales,Planktothrix,Planktothrix prolifica<br>3 ix prolifica                                                                                                           |
| 493535324 | 299 | 587 | Thermotogae    | Mesotoga infera                                  | Bacteria,Thermotogae,Thermotogae,Kosmotogales,Kosmotogaceae,Mesotoga,Mesotoga infera<br>1 oga infera                                                                                                                          |
| 499805551 | 299 | 588 | Proteobacteria | Polaromonas sp. JS666                            | Bacteria,Proteobacteria,Betaproteobacteria,Burkholderiales,Comamonadaceae,Polaromonas,Polaromonas sp. JS666<br>3 romonas,Polaromonas sp. JS666                                                                                |
| 919167330 | 295 | 589 | Euryarchaeota  | Methanosarcina lacustris                         | Archaea,Euryarchaeota,Methanomicrobia,Methanosarcinales,Methanosarcinaceae,<br>60 Methanosarcina,Methanosarcina lacustris                                                                                                     |
| 196179440 | 292 | 590 | Cyanobacteria  | Coleofasciculus chthonoplastes PCC 7420          | Bacteria,Cyanobacteria,Oscillatoriothrixaceae,Oscillatoriales,Coleofasciculus,Coleofasciculus chthonoplastes,Coleofasciculus chthonoplastes PCC 7420<br>16 chthonoplastes PCC 7420                                            |
| 124514584 | 291 | 591 | Nitrospirae    | Leptospirillum rubarum                           | Bacteria,Nitrospirae,Nitrospira,Nitrospirales,Nitrospiraceae,Leptospirillum,Leptospirillum sp. Group II,Leptospirillum rubarum<br>2 illum sp. Group II,Leptospirillum rubarum                                                 |
| 588476658 | 289 | 592 | Firmicutes     | Lactobacillus composti DSM 18527 = JCM 14202     | Bacteria,Firmicutes,Bacilli,Lactobacillales,Lactobacillaceae,Lactobacillus,Lactobacillus composti,Lactobacillus composti DSM 18527 = JCM 14202<br>3 18527 = JCM 14202                                                         |
| 902595239 | 289 | 593 | Firmicutes     | Geobacillus stearothermophilus                   | Bacteria,Firmicutes,Bacilli,Bacillales,Bacillaceae,Geobacillus,Geobacillus stearothermophilus<br>3 steaothermophilus                                                                                                          |
| 496087940 | 287 | 594 | Proteobacteria | Burkholderiales bacterium 1_1_47                 | Bacteria,Proteobacteria,Betaproteobacteria,Burkholderiales,unclassified Burkholderiales,unclassified Burkholderiales (miscellaneous),Burkholderiales<br>14 bacterium 1_1_47                                                   |

|           |     |     |                |                                                                  |                                                                                                                                                                                                                                                   |
|-----------|-----|-----|----------------|------------------------------------------------------------------|---------------------------------------------------------------------------------------------------------------------------------------------------------------------------------------------------------------------------------------------------|
| 334181048 | 283 | 595 | Firmicutes     | Caldalkalibacillus<br>thermarum TA2.A1                           | Bacteria,Firmicutes,Bacilli,Bacillales,Bacillaceae,Caldalkalibacillus,Caldalkalibacillus<br>thermarum,Caldalkalibacillus thermarum<br>2 TA2.A1                                                                                                    |
| 809070817 | 280 | 596 | Cyanobacteria  | Arthrospira sp. TJS091                                           | Bacteria,Cyanobacteria,Oscillatoriophyceae,<br>Oscillatoriales,Arthrospira,Arthrospira<br>7 sp. TJS091                                                                                                                                            |
| 814727436 | 278 | 597 | Euryarchaeota  | Methanosarcina sp.<br>2.H.A.1B.4                                 | Archaea,Euryarchaeota,Methanomicrobia,<br>Methanosarcinales,Methanosarcinaceae,<br>Methanosarcina,Methanosarcina sp.<br>4 2.H.A.1B.4                                                                                                              |
| 124514585 | 276 | 598 | Nitrospirae    | Leptospirillum rubarum                                           | Bacteria,Nitrospirae,Nitrospira,Nitrospirales,<br>Nitrospiraceae,Leptospirillum,Leptospirillum<br>2 illum sp. Group II,Leptospirillum rubarum                                                                                                     |
| 332351076 | 276 | 599 | Cyanobacteria  | Moorea producens 3L                                              | Bacteria,Cyanobacteria,Oscillatoriophyceae,<br>Oscillatoriales,Moorea,Moorea<br>12 producens,Moorea producens 3L                                                                                                                                  |
| 196187499 | 275 | 600 | Cyanobacteria  | Synechococcus sp. PCC<br>7335                                    | Bacteria,Cyanobacteria,Oscillatoriophyceae,<br>Chroococcales,Synechococcus,Synechococcus<br>6 cococcus sp. PCC 7335                                                                                                                               |
| 648259526 | 271 | 601 | Firmicutes     | Sulfobacillus<br>thermosulfidooxidans                            | Bacteria,Firmicutes,Clostridia,Clostridiales,<br>Clostridiales incertae sedis,Clostridiales<br>Family XVII. Incertae<br>Sedis,Sulfobacillus,Sulfobacillus<br>4 thermosulfidooxidans                                                               |
| 339836119 | 270 | 602 | Proteobacteria | Acidithiobacillus sp. GGI-<br>221                                | Bacteria,Proteobacteria,Gammaproteobacteria,<br>Acidithiobacillales,Acidithiobacillaceae,<br>Acidithiobacillus,Acidithiobacillus sp.<br>3 GGI-221                                                                                                 |
| 530557143 | 270 | 603 | Euryarchaeota  | Ferroplasma sp. Type II                                          | Archaea,Euryarchaeota,Thermoplasmata,<br>Thermoplasmatales,Ferroplasmaceae,Ferroplasma,<br>environmental<br>16 samples,Ferroplasma sp. Type II                                                                                                    |
| 558532298 | 269 | 604 | Actinobacteria | Streptomyces<br>roseochromogenus<br>subsp. oscitans DS<br>12.976 | Bacteria,Actinobacteria,Actinobacteria,Streptomyce-<br>tales,Streptomycetaceae,Streptomyces,<br>Streptomyces<br>roseochromogenus,Streptomyces<br>roseochromogenus subsp.<br>oscitans,Streptomyces roseochromogenus<br>1 subsp. oscitans DS 12.976 |
| 655460615 | 265 | 605 | Thermotogae    | Pseudothermotoga elfii                                           | Bacteria,Thermotogae,Thermotogae,Thermotogales,<br>Thermotogaceae,Pseudothermotoga<br>2 otoga,Pseudothermotoga elfii                                                                                                                              |
| 119463013 | 263 | 606 | Cyanobacteria  | Nodularia spumigena<br>CCY9414                                   | Bacteria,Cyanobacteria,Nostocales,Nostocaceae,<br>Nodularia,Nodularia<br>12 spumigena,Nodularia spumigena CCY9414                                                                                                                                 |
| 302858720 | 263 | 607 | Proteobacteria | Burkholderiales<br>bacterium 1_1_47                              | Bacteria,Proteobacteria,Betaproteobacteria,<br>Burkholderiales,unclassified<br>Burkholderiales<br>Burkholderiales<br>(miscellaneous),Burkholderiales<br>14 bacterium 1_1_47                                                                       |
| 530929278 | 263 | 608 | Nitrospirae    | Leptospirillum sp. Group<br>IV 'UBA BS'                          | Bacteria,Nitrospirae,Nitrospira,Nitrospirales,<br>Nitrospiraceae,Leptospirillum,Leptospirillum<br>8 Group IV 'UBA BS'                                                                                                                             |
| 406714585 | 261 | 609 | Cyanobacteria  | Arthrospira platensis C1                                         | Bacteria,Cyanobacteria,Oscillatoriophyceae,<br>Oscillatoriales,Arthrospira,Arthrospira<br>3 platensis,Arthrospira platensis C1                                                                                                                    |

|           |     |     |                |                                         |    |                                                                                                                                                      |
|-----------|-----|-----|----------------|-----------------------------------------|----|------------------------------------------------------------------------------------------------------------------------------------------------------|
| 763116037 | 260 | 610 | Cyanobacteria  | Microcystis aeruginosa                  | 35 | Bacteria,Cyanobacteria,Oscillatoriophycid eae,Chroococcales,Microcystis,Microcystis aeruginosa                                                       |
| 196181015 | 257 | 611 | Cyanobacteria  | Coleofasciculus chthonoplastes PCC 7420 | 16 | Bacteria,Cyanobacteria,Oscillatoriophycid eae,Oscillatoriales,Coleofasciculus,Coleofasciculus chthonoplastes,Coleofasciculus chthonoplastes PCC 7420 |
| 530558507 | 252 | 612 | Euryarchaeota  | Ferroplasma sp. Type II                 | 16 | Archaea,Euryarchaeota,Thermoplasmata, Thermoplasmatales,Ferroplasmaceae,Ferroplasma,environmental samples,Ferroplasma sp. Type II                    |
| 898209016 | 252 | 613 | Cyanobacteria  | Limnoraphis robusta                     | 9  | Bacteria,Cyanobacteria,Oscillatoriophycid eae,Oscillatoriales,Limnoraphis,Limnoraphis robusta                                                        |
| 918699942 | 252 | 614 | Chloroflexi    | Ktedonobacter racemifer                 | 52 | Bacteria,Chloroflexi,Ktedonobacteria,Ktedonobacterales,Ktedonobacteraceae,Ktedonobacter,Ktedonobacter racemifer                                      |
| 916344013 | 251 | 615 | Cyanobacteria  | Scytonema hofmanni                      | 13 | Bacteria,Cyanobacteria,Nostocales,Scytonemataceae,Scytonema,Scytonema hofmanni                                                                       |
| 543515433 | 250 | 616 | Cyanobacteria  | Crocospaera watsonii WH 8502            | 2  | Bacteria,Cyanobacteria,Oscillatoriophycid eae,Chroococcales,Crocospaera,Crocospaera watsonii,Crocospaera watsonii WH 8502                            |
| 851263164 | 246 | 617 | Euryarchaeota  | Methanosarcina sp. 2.H.T.1A.3           | 2  | Archaea,Euryarchaeota,Methanomicrobia, Methanosarcinales,Methanosarcinaceae, Methanosarcina,Methanosarcina sp. 2.H.T.1A.3                            |
| 652325204 | 245 | 618 | Cyanobacteria  | Fischerella sp. PCC 9431                | 3  | Bacteria,Cyanobacteria,Stigonematales,Fischerella,Fischerella sp. PCC 9431                                                                           |
| 738947798 | 245 | 619 | Cyanobacteria  | Planktothrix                            | 8  | Bacteria,Cyanobacteria,Oscillatoriophycid eae,Oscillatoriales,Planktothrix                                                                           |
| 750138933 | 242 | 620 | Chloroflexi    | Ktedonobacter racemifer                 | 52 | Bacteria,Chloroflexi,Ktedonobacteria,Ktedonobacterales,Ktedonobacteraceae,Ktedonobacter,Ktedonobacter racemifer                                      |
| 908628614 | 241 | 621 | Firmicutes     | Acetohalobium arabaticum                | 4  | Bacteria,Firmicutes,Clostridia,Halanaerobiales,Halobacteroidaceae,Acetohalobium,Acetohalobium arabaticum                                             |
| 119463753 | 239 | 622 | Cyanobacteria  | Nodularia spumigena CCY9414             | 12 | Bacteria,Cyanobacteria,Nostocales,Nostocaceae,Nodularia,Nodularia spumigena,Nodularia spumigena CCY9414                                              |
| 260864875 | 234 | 623 | Firmicutes     | Ammonifex degensii KC4                  | 1  | Bacteria,Firmicutes,Clostridia,Thermoanaerobacterales,Thermoanaerobacteraceae, Moorella group,Ammonifex,Ammonifex degensii,Ammonifex degensii KC4    |
| 917378091 | 234 | 624 | Proteobacteria | Acidithiobacillus ferrivorans           | 11 | Bacteria,Proteobacteria,Gammaproteobacteria,Acidithiobacillales,Acidithiobacillaceae,Acidithiobacillus,Acidithiobacillus ferrivorans                 |
| 738378477 | 233 | 625 | Tenericutes    | Mollicutes bacterium HR2                | 1  | Bacteria,Tenericutes,Mollicutes,unclassified Mollicutes,unclassified Mollicutes (miscellaneous),Mollicutes bacterium HR2                             |
| 919167253 | 231 | 626 | Euryarchaeota  | Methanosarcina lacustris                | 60 | Archaea,Euryarchaeota,Methanomicrobia, Methanosarcinales,Methanosarcinaceae, Methanosarcina,Methanosarcina lacustris                                 |

|           |     |     |                    |                                         |    |                                                                                                                                                                                                                 |
|-----------|-----|-----|--------------------|-----------------------------------------|----|-----------------------------------------------------------------------------------------------------------------------------------------------------------------------------------------------------------------|
| 332351060 | 230 | 627 | Cyanobacteria      | Moorea producens 3L                     | 12 | Bacteria,Cyanobacteria,Oscillatoriophycid eae,Oscillatoriales,Moorea,Moorea producens,Moorea producens 3L                                                                                                       |
| 357261355 | 228 | 628 | Cyanobacteria      | Crocospaera watsonii WH 0003            | 5  | Bacteria,Cyanobacteria,Oscillatoriophycid eae,Chroococcales,Crocospaera,Crocospaera watsonii,Crocospaera watsonii WH 0003                                                                                       |
| 157313573 | 227 | 629 | Thermotogae        | Pseudothermotoga lettingae TMO          | 2  | Bacteria,Thermotogae,Thermotogae,Thermotogales,Thermotogaceae,Pseudothermotoga,Pseudothermotoga lettingae,Pseudothermotoga lettingae TMO                                                                        |
| 251771570 | 224 | 630 | Nitrospirae        | Leptospirillum ferrodiazotrophum        | 14 | Bacteria,Nitrospirae,Nitospira,Nitrospirales,Nitrospiraceae,Leptospirillum,Leptospirillum sp. Group III,Leptospirillum ferrodiazotrophum                                                                        |
| 302858718 | 224 | 631 | Proteobacteria     | Burkholderiales bacterium 1_1_47        | 14 | Bacteria,Proteobacteria,Betaproteobacteria,Burkholderiales,unclassified Burkholderiales,unclassified Burkholderiales (miscellaneous),Burkholderiales bacterium 1_1_47                                           |
| 196180239 | 223 | 632 | Cyanobacteria      | Coleofasciculus chthonoplastes PCC 7420 | 16 | Bacteria,Cyanobacteria,Oscillatoriophycid eae,Oscillatoriales,Coleofasciculus,Coleofasciculus chthonoplastes,Coleofasciculus chthonoplastes PCC 7420                                                            |
| 723287742 | 223 | 633 | Proteobacteria     | Candidatus Thiomargarita nelsonii       | 10 | Bacteria,Proteobacteria,Gammaproteobacteria,Thiotrichales,Thiotrichaceae,Thiomargarita,Candidatus Thiomargarita nelsonii                                                                                        |
| 179352487 | 222 | 634 | Firmicutes         | Natranaerobius thermophilus JW/NM-WN-LF | 1  | Bacteria,Firmicutes,Clostridia,Natranaerobiales,Natranaerobiaceae,Natranaerobius,Natranaerobius thermophilus,Natranaerobius thermophilus JW/NM-WN-LF                                                            |
| 917775145 | 220 | 635 | Cyanobacteria      | Scytonema millei                        | 2  | Bacteria,Cyanobacteria,Nostocales,Scytonemataceae,Scytonema,Scytonema millei                                                                                                                                    |
| 919167263 | 218 | 636 | Euryarchaeota      | Methanosarcina lacustris                | 60 | Archaea,Euryarchaeota,Methanomicrobia,Methanosarcinales,Methanosarcinaceae,Methanosarcina,Methanosarcina lacustris                                                                                              |
| 119461613 | 214 | 637 | Cyanobacteria      | Nodularia spumigena CCY9414             | 12 | Bacteria,Cyanobacteria,Nostocales,Nostocaceae,Nodularia,Nodularia spumigena,Nodularia spumigena CCY9414                                                                                                         |
| 914401554 | 214 | 638 | Cyanobacteria      | Microcystis panniformis FACHB-1757      | 1  | Bacteria,Cyanobacteria,Oscillatoriophycid eae,Chroococcales,Microcystis,Microcystis panniformis,Microcystis panniformis FACHB-1757                                                                              |
| 16611907  | 212 | 639 | cellular organisms | Taxus wallichiana var. chinensis        | 1  | Eukaryota,Viridiplantae,Streptophyta,Streptophytina,Embryophyta,Tracheophyta,Euphyllophyta,Spermatophyta,Acrogymnospermae,Pinidae,Cupressales,Taxaceae,Taxus,Taxus wallichiana,Taxus wallichiana var. chinensis |
| 378599067 | 208 | 640 | Proteobacteria     | Sutterella parvirubra YIT 11816         | 2  | Bacteria,Proteobacteria,Betaproteobacteria,Burkholderiales,Sutterellaceae,Sutterella,Sutterella parvirubra,Sutterella parvirubra YIT 11816                                                                      |



|           |     |     |                |                                        |                                                                                                                                                                                          |
|-----------|-----|-----|----------------|----------------------------------------|------------------------------------------------------------------------------------------------------------------------------------------------------------------------------------------|
| 316895289 | 207 | 641 | Firmicutes     | Lachnospiraceae<br>bacterium 5_1_63FAA | Bacteria,Firmicutes,Clostridia,Clostridiales<br>,Lachnospiraceae,unclassified<br>Lachnospiraceae,Lachnospiraceae<br>1 bacterium 5_1_63FAA                                                |
| 737152716 | 206 | 642 | Cyanobacteria  | Fischerella sp. PCC 9605               | Bacteria,Cyanobacteria,Stigonematales,Fis<br>cherella,Fischerella sp. PCC 9605<br>1                                                                                                      |
| 763117433 | 206 | 643 | Cyanobacteria  | Microcystis aeruginosa                 | Bacteria,Cyanobacteria,Oscillatoriophycid<br>eae,Chroococcales,Microcystis,Microcystis<br>35 aeruginosa                                                                                  |
| 302859206 | 205 | 644 | Proteobacteria | Burkholderiales<br>bacterium 1_1_47    | Bacteria,Proteobacteria,Betaproteobacter<br>ia,Burkholderiales,unclassified<br>Burkholderiales,unclassified<br>Burkholderiales<br>(miscellaneous),Burkholderiales<br>14 bacterium 1_1_47 |
| 543532102 | 205 | 645 | Cyanobacteria  | Crocospaera watsonii<br>WH 0402        | Bacteria,Cyanobacteria,Oscillatoriophycid<br>eae,Chroococcales,Crocospaera,Crocosp<br>haera watsonii,Crocospaera watsonii WH<br>3 0402                                                   |
| 564135307 | 205 | 646 | Firmicutes     | Youngiibacter fragilis<br>232.1        | Bacteria,Firmicutes,Clostridia,Clostridiales<br>,Clostridiaceae,Youngiibacter,Youngiibacte<br>r fragilis,Youngiibacter fragilis 232.1<br>7                                               |
| 918374422 | 204 | 647 | Cyanobacteria  | Microcystis aeruginosa                 | Bacteria,Cyanobacteria,Oscillatoriophycid<br>eae,Chroococcales,Microcystis,Microcystis<br>35 aeruginosa                                                                                  |
| 546230530 | 203 | 648 | Cyanobacteria  | Crocospaera watsonii                   | Bacteria,Cyanobacteria,Oscillatoriophycid<br>eae,Chroococcales,Crocospaera,Crocosp<br>14 haera watsonii                                                                                  |
| 805338714 | 203 | 649 | Euryarchaeota  | Methanosarcina sp.<br>WWM596           | Archaea,Euryarchaeota,Methanomicrobia,<br>Methanosarcinales,Methanosarcinaceae,<br>Methanosarcina,Methanosarcina sp.<br>5 WWM596                                                         |
| 428237825 | 202 | 650 | Cyanobacteria  | Calothrix sp. PCC 6303                 | Bacteria,Cyanobacteria,Nostocales,Rivular<br>iaceae,Calothrix,Calothrix<br>1 parietina,Calothrix sp. PCC 6303                                                                            |
| 916309170 | 202 | 651 | Cyanobacteria  | Geitlerinema sp. PCC<br>7105           | Bacteria,Cyanobacteria,Oscillatoriophycid<br>eae,Oscillatoriales,Geitlerinema,Geitlerine<br>18 ma sp. PCC 7105                                                                           |
| 291570420 | 201 | 652 | Cyanobacteria  | Arthrospira platensis<br>NIES-39       | Bacteria,Cyanobacteria,Oscillatoriophycid<br>eae,Oscillatoriales,Arthrospira,Arthrospira<br>2 platensis,Arthrospira platensis NIES-39                                                    |
| 516358073 | 200 | 653 | Cyanobacteria  | Scytonema hofmanni                     | Bacteria,Cyanobacteria,Nostocales,Scyton<br>emataceae,Scytonema,Scytonema<br>13 hofmanni                                                                                                 |
| 78499559  | 197 | 654 | Cyanobacteria  | Arthrospira platensis                  | Bacteria,Cyanobacteria,Oscillatoriophycid<br>eae,Oscillatoriales,Arthrospira,Arthrospira<br>20 platensis                                                                                 |
| 916309171 | 197 | 655 | Cyanobacteria  | Geitlerinema sp. PCC<br>7105           | Bacteria,Cyanobacteria,Oscillatoriophycid<br>eae,Oscillatoriales,Geitlerinema,Geitlerine<br>18 ma sp. PCC 7105                                                                           |
| 916344012 | 196 | 656 | Cyanobacteria  | Scytonema hofmanni                     | Bacteria,Cyanobacteria,Nostocales,Scyton<br>emataceae,Scytonema,Scytonema<br>13 hofmanni                                                                                                 |
| 516356583 | 192 | 657 | Cyanobacteria  | Scytonema hofmanni                     | Bacteria,Cyanobacteria,Nostocales,Scyton<br>emataceae,Scytonema,Scytonema<br>13 hofmanni                                                                                                 |
| 825911310 | 191 | 658 | Firmicutes     | Aneurinibacillus<br>tyrosinisolvens    | Bacteria,Firmicutes,Bacilli,Bacillales,Paeni<br>bacillaceae,Aneurinibacillus<br>group,Aneurinibacillus,Aneurinibacillus<br>5 tyrosinisolvens                                             |

|           |     |     |                |                                       |                                                                                                                                                    |
|-----------|-----|-----|----------------|---------------------------------------|----------------------------------------------------------------------------------------------------------------------------------------------------|
| 306985451 | 187 | 659 | Cyanobacteria  | Cyanothece sp. PCC 7822               | Bacteria,Cyanobacteria,Oscillatoriophyceae,Chroococcales,Cyanothece,Cyanothece sp. PCC 7822                                                        |
| 516146108 | 187 | 660 | Actinobacteria | Nocardiopsis kunsanensis              | Bacteria,Actinobacteria,Actinobacteria,Streptosporangiales,Nocardiopsaceae,Nocardiopsis,Nocardiopsis kunsanensis                                   |
| 763155591 | 187 | 661 | Cyanobacteria  | Microcystis aeruginosa                | Bacteria,Cyanobacteria,Oscillatoriophyceae,Chroococcales,Microcystis,Microcystis aeruginosa                                                        |
| 908628613 | 187 | 662 | Firmicutes     | Acetohalobium arabaticum              | Bacteria,Firmicutes,Clostridia,Halanaerobiales,Halobacteroidaceae,Acetohalobium,Acetohalobium arabaticum                                           |
| 763117162 | 186 | 663 | Cyanobacteria  | Microcystis aeruginosa                | Bacteria,Cyanobacteria,Oscillatoriophyceae,Chroococcales,Microcystis,Microcystis aeruginosa                                                        |
| 209491336 | 184 | 664 | Cyanobacteria  | Arthrospira maxima CS-328             | Bacteria,Cyanobacteria,Oscillatoriophyceae,Oscillatoriales,Arthrospira,Arthrospira maxima,Arthrospira maxima CS-328                                |
| 916968425 | 183 | 665 | Firmicutes     | Sporolactobacillus terrae             | Bacteria,Firmicutes,Bacilli,Bacillales,Sporolactobacillaceae,Sporolactobacillus,Sporolactobacillus terrae                                          |
| 209491231 | 180 | 666 | Cyanobacteria  | Arthrospira maxima CS-328             | Bacteria,Cyanobacteria,Oscillatoriophyceae,Oscillatoriales,Arthrospira,Arthrospira maxima,Arthrospira maxima CS-328                                |
| 332351061 | 180 | 667 | Cyanobacteria  | Moorea producens 3L                   | Bacteria,Cyanobacteria,Oscillatoriophyceae,Oscillatoriales,Moorea,Moorea producens,Moorea producens 3L                                             |
| 431999864 | 179 | 668 | Firmicutes     | Anoxybacillus flavithermus TNO-09.006 | Bacteria,Firmicutes,Bacilli,Bacillales,Bacillaceae,Anoxybacillus,Anoxybacillus flavithermus,Anoxybacillus flavithermus TNO-09.006                  |
| 765303043 | 177 | 669 | Proteobacteria | Halomonas meridiana                   | Bacteria,Proteobacteria,Gammaproteobacteria,Oceanospirillales,Halomonadaceae,Halomonas,Halomonas meridiana                                         |
| 825857133 | 177 | 670 | Firmicutes     | Aneurinibacillus tyrosinisolvans      | Bacteria,Firmicutes,Bacilli,Bacillales,Paenibacillaceae,Aneurinibacillus group,Aneurinibacillus,Aneurinibacillus tyrosinisolvans                   |
| 805377640 | 176 | 671 | Euryarchaeota  | Methanosarcina lacustris Z-7289       | Archaea,Euryarchaeota,Methanomicrobia,Methanosarcinales,Methanosarcinaceae,Methanosarcina,Methanosarcina lacustris,Methanosarcina lacustris Z-7289 |
| 917312938 | 175 | 672 | Actinobacteria | Streptomyces sp. NRRL F-5140          | Bacteria,Actinobacteria,Actinobacteria,Streptomyetales,Streptomycetaceae,Streptomyces,Streptomyces sp. NRRL F-5140                                 |
| 763155413 | 174 | 673 | Cyanobacteria  | Microcystis aeruginosa                | Bacteria,Cyanobacteria,Oscillatoriophyceae,Chroococcales,Microcystis,Microcystis aeruginosa                                                        |
| 500832884 | 173 | 674 | Thermotogae    | Pseudothermotoga lettingae            | Bacteria,Thermotogae,Thermotogae,Thermotogales,Thermotogaceae,Pseudothermotoga,Pseudothermotoga lettingae                                          |
| 517209446 | 173 | 675 | Cyanobacteria  | filamentous cyanobacterium ESFC-1     | Bacteria,Cyanobacteria,Oscillatoriophyceae,Oscillatoriales,unclassified Oscillatoriales,filamentous cyanobacterium ESFC-1                          |

|           |     |     |               |                                      |                                                                                                                                                               |
|-----------|-----|-----|---------------|--------------------------------------|---------------------------------------------------------------------------------------------------------------------------------------------------------------|
| 530927867 | 173 | 676 | Nitrospirae   | Leptospirillum sp. Group IV 'UBA BS' | Bacteria,Nitrospirae,Nitrospira,Nitrospirales,Nitrospiraceae,Leptospirillum,Leptospirillum sp. Group IV,Leptospirillum sp. Group IV 'UBA BS'                  |
| 763054851 | 171 | 677 | Cyanobacteria | Planktothrix rubescens               | Bacteria,Cyanobacteria,Oscillatoriophyceae,Oscillatoriales,Planktothrix,Planktothrix rubescens                                                                |
| 805377641 | 168 | 678 | Euryarchaeota | Methanosarcina lacustris Z-7289      | Archaea,Euryarchaeota,Methanomicrobia,Methanosarcinales,Methanosarcinaceae,Methanosarcina,Methanosarcina lacustris,Methanosarcina lacustris Z-7289            |
| 119462723 | 164 | 679 | Cyanobacteria | Nodularia spumigena CCY9414          | Bacteria,Cyanobacteria,Nostocales,Nostocaceae,Nodularia,Nodularia spumigena,Nodularia spumigena CCY9414                                                       |
| 297143449 | 161 | 680 | Firmicutes    | [Bacillus] selenitireducens MLS10    | Bacteria,Firmicutes,Bacilli,Bacillales,Sporolactobacillaceae,unclassified Sporolactobacillaceae,[Bacillus] selenitireducens,[Bacillus] selenitireducens MLS10 |
| 442790558 | 161 | 681 | Cyanobacteria | Gloeocapsa sp. PCC 73106             | Bacteria,Cyanobacteria,Oscillatoriophyceae,Chroococcales,Gloeocapsa,Gloeocapsa sp. PCC 73106                                                                  |
| 530557142 | 161 | 682 | Euryarchaeota | Ferroplasma sp. Type II              | Archaea,Euryarchaeota,Thermoplasmata,Thermoplasmatales,Ferroplasmaceae,Ferroplasma,environmental samples,Ferroplasma sp. Type II                              |
| 332351077 | 160 | 683 | Cyanobacteria | Moorea producens 3L                  | Bacteria,Cyanobacteria,Oscillatoriophyceae,Oscillatoriales,Moorea,Moorea producens,Moorea producens 3L                                                        |
| 488892048 | 160 | 684 | Cyanobacteria | Microcystis aeruginosa               | Bacteria,Cyanobacteria,Oscillatoriophyceae,Chroococcales,Microcystis,Microcystis aeruginosa                                                                   |
| 530560466 | 160 | 685 | Euryarchaeota | Ferroplasma sp. Type II              | Archaea,Euryarchaeota,Thermoplasmata,Thermoplasmatales,Ferroplasmaceae,Ferroplasma,environmental samples,Ferroplasma sp. Type II                              |
| 737791031 | 157 | 686 | Cyanobacteria | Arthrospira                          | Bacteria,Cyanobacteria,Oscillatoriophyceae,Oscillatoriales,Arthrospira                                                                                        |
| 779875597 | 157 | 687 | Cyanobacteria | Microcystis aeruginosa               | Bacteria,Cyanobacteria,Oscillatoriophyceae,Chroococcales,Microcystis,Microcystis aeruginosa                                                                   |
| 495466059 | 156 | 688 | Cyanobacteria | Moorea producens                     | Bacteria,Cyanobacteria,Oscillatoriophyceae,Oscillatoriales,Moorea,Moorea producens                                                                            |
| 898216031 | 156 | 689 | Cyanobacteria | Limnoraphis robusta                  | Bacteria,Cyanobacteria,Oscillatoriophyceae,Oscillatoriales,Limnoraphis,Limnoraphis robusta                                                                    |
| 334181047 | 154 | 690 | Firmicutes    | Caldalkalibacillus thermarum TA2.A1  | Bacteria,Firmicutes,Bacilli,Bacillales,Bacillaceae,Caldalkalibacillus,Caldalkalibacillus thermarum,Caldalkalibacillus thermarum TA2.A1                        |
| 389829748 | 153 | 691 | Cyanobacteria | Microcystis aeruginosa PCC 9809      | Bacteria,Cyanobacteria,Oscillatoriophyceae,Chroococcales,Microcystis,Microcystis aeruginosa,Microcystis aeruginosa PCC 9809                                   |
| 406713030 | 153 | 692 | Cyanobacteria | Arthrospira platensis C1             | Bacteria,Cyanobacteria,Oscillatoriophyceae,Oscillatoriales,Arthrospira,Arthrospira platensis,Arthrospira platensis C1                                         |

|           |     |     |                |                                                  |                                                                                                                                                                                      |
|-----------|-----|-----|----------------|--------------------------------------------------|--------------------------------------------------------------------------------------------------------------------------------------------------------------------------------------|
| 753833694 | 153 | 693 | Firmicutes     | Thermoanaerobacter<br>wiegellii                  | Bacteria,Firmicutes,Clostridia,Thermoana<br>erobacterales,Thermoanaerobacteraceae,<br>Thermoanaerobacter,Thermoanaerobacte<br>1 r wiegellii                                          |
| 805377874 | 151 | 694 | Euryarchaeota  | Methanosarcina<br>lacustris Z-7289               | Archaea,Euryarchaeota,Methanomicrobia,<br>Methanosarcinales,Methanosarcinaceae,<br>Methanosarcina,Methanosarcina<br>17 lacustris,Methanosarcina lacustris Z-7289                     |
| 159030837 | 150 | 695 | Cyanobacteria  | Microcystis aeruginosa<br>PCC 7806               | Bacteria,Cyanobacteria,Oscillatoriophycid<br>eae,Chroococcales,Microcystis,Microcystis<br>aeruginosa,Microcystis aeruginosa PCC<br>2 7806                                            |
| 851249382 | 150 | 696 | Euryarchaeota  | Methanosarcina                                   | Archaea,Euryarchaeota,Methanomicrobia,<br>Methanosarcinales,Methanosarcinaceae,<br>2 Methanosarcina                                                                                  |
| 543515434 | 149 | 697 | Cyanobacteria  | Crocospaera watsonii<br>WH 8502                  | Bacteria,Cyanobacteria,Oscillatoriophycid<br>eae,Chroococcales,Crocospaera,Crocosp<br>haera watsonii,Crocospaera watsonii WH<br>2 8502                                               |
| 543532038 | 149 | 698 | Cyanobacteria  | Crocospaera watsonii<br>WH 0402                  | Bacteria,Cyanobacteria,Oscillatoriophycid<br>eae,Chroococcales,Crocospaera,Crocosp<br>haera watsonii,Crocospaera watsonii WH<br>3 0402                                               |
| 744449740 | 149 | 699 | Cyanobacteria  | Tolypothrix bouteillei<br>VB521301               | Bacteria,Cyanobacteria,Nostocales,Microc<br>haetaceae,Tolypothrix,Tolypothrix<br>1 bouteillei,Tolypothrix bouteillei VB521301                                                        |
| 329571287 | 148 | 700 | Proteobacteria | Parasutterella<br>excrementihominis YIT<br>11859 | Bacteria,Proteobacteria,Betaproteobacter<br>ia,Burkholderiales,Sutterellaceae,Parasutt<br>erella,Parasutterella<br>excrementihominis,Parasutterella<br>6 excrementihominis YIT 11859 |
| 329571288 | 147 | 701 | Proteobacteria | Parasutterella<br>excrementihominis YIT<br>11859 | Bacteria,Proteobacteria,Betaproteobacter<br>ia,Burkholderiales,Sutterellaceae,Parasutt<br>erella,Parasutterella<br>excrementihominis,Parasutterella<br>6 excrementihominis YIT 11859 |
| 750683093 | 147 | 702 | Cyanobacteria  | Planktothrix mougeotii                           | Bacteria,Cyanobacteria,Oscillatoriophycid<br>eae,Oscillatoriales,Planktothrix,Planktothr<br>3 ix mougeotii                                                                           |
| 809069588 | 143 | 703 | Cyanobacteria  | Arthrospira sp. TJS091                           | Bacteria,Cyanobacteria,Oscillatoriophycid<br>eae,Oscillatoriales,Arthrospira,Arthrospira<br>7 sp. TJS091                                                                             |
| 898209176 | 143 | 704 | Cyanobacteria  | Limnoraphis robusta                              | Bacteria,Cyanobacteria,Oscillatoriophycid<br>eae,Oscillatoriales,Limnoraphis,Limnoraph<br>9 is robusta                                                                               |
| 196181246 | 142 | 705 | Cyanobacteria  | Coleofasciculus<br>chthonoplastes PCC<br>7420    | Bacteria,Cyanobacteria,Oscillatoriophycid<br>eae,Oscillatoriales,Coleofasciculus,Coleofa<br>sciculus chthonoplastes,Coleofasciculus<br>16 chthonoplastes PCC 7420                    |
| 748630019 | 140 | 706 | Cyanobacteria  | Microcoleus vaginatus                            | Bacteria,Cyanobacteria,Oscillatoriophycid<br>eae,Oscillatoriales,Microcoleus,Microcole<br>1 us vaginatus                                                                             |
| 442790478 | 139 | 707 | Cyanobacteria  | Gloeocapsa sp. PCC<br>73106                      | Bacteria,Cyanobacteria,Oscillatoriophycid<br>eae,Chroococcales,Gloeocapsa,Gloeocaps<br>24 a sp. PCC 73106                                                                            |
| 332349885 | 138 | 708 | Cyanobacteria  | Moorea producens 3L                              | Bacteria,Cyanobacteria,Oscillatoriophycid<br>eae,Oscillatoriales,Moorea,Moorea<br>12 producens,Moorea producens 3L                                                                   |

|           |     |     |                |                                                  |                                                                                                                                                                                                                                                                                                           |
|-----------|-----|-----|----------------|--------------------------------------------------|-----------------------------------------------------------------------------------------------------------------------------------------------------------------------------------------------------------------------------------------------------------------------------------------------------------|
| 783187507 | 136 | 709 | Firmicutes     | Peptococcaceae<br>bacterium BRH_c23              | Bacteria,Firmicutes,Clostridia,Clostridiales<br>,Peptococcaceae,unclassified<br>Peptococcaceae,Peptococcaceae<br>1 bacterium BRH_c23<br>Bacteria,Proteobacteria,Betaproteobacter<br>ia,Burkholderiales,unclassified<br>Burkholderiales,unclassified<br>Burkholderiales<br>(miscellaneous),Burkholderiales |
| 302859777 | 135 | 710 | Proteobacteria | Burkholderiales<br>bacterium 1_1_47              | 14 bacterium 1_1_47<br>Archaea,Euryarchaeota,Methanomicrobia,<br>Methanosarcinales,Methanosarcinaceae,<br>Methanosarcina,Methanosarcina sp.                                                                                                                                                               |
| 851296135 | 135 | 711 | Euryarchaeota  | Methanosarcina sp.<br>WWM596                     | 5 WWM596                                                                                                                                                                                                                                                                                                  |
| 919167354 | 134 | 712 | Euryarchaeota  | Methanosarcina<br>lacustris                      | Archaea,Euryarchaeota,Methanomicrobia,<br>Methanosarcinales,Methanosarcinaceae,<br>60 Methanosarcina,Methanosarcina lacustris<br>Bacteria,Cyanobacteria,Oscillatoriohyphid<br>eae,Oscillatoriales,Arthrospira,Arthrospira                                                                                 |
| 78499563  | 133 | 713 | Cyanobacteria  | Arthrospira platensis                            | 20 platensis<br>Bacteria,Cyanobacteria,Oscillatoriohyphid<br>eae,Chroococcales,Crocospaera,Crocosp<br>haera watsonii,Crocospaera watsonii WH                                                                                                                                                              |
| 357263981 | 132 | 714 | Cyanobacteria  | Crocospaera watsonii<br>WH 0003                  | 5 0003                                                                                                                                                                                                                                                                                                    |
| 919167307 | 132 | 715 | Euryarchaeota  | Methanosarcina<br>lacustris                      | Archaea,Euryarchaeota,Methanomicrobia,<br>Methanosarcinales,Methanosarcinaceae,<br>60 Methanosarcina,Methanosarcina lacustris<br>Bacteria,Nitrospirae,Nitrospira,Nitrospir<br>ales,Nitrospiraceae,Leptospirillum,Leptospi<br>rillum sp. Group IV,Leptospirillum sp.                                       |
| 530929275 | 130 | 716 | Nitrospirae    | Leptospirillum sp. Group<br>IV 'UBA BS'          | 8 Group IV 'UBA BS'                                                                                                                                                                                                                                                                                       |
| 915406150 | 130 | 717 | Proteobacteria | Parasutterella<br>excrementihominis              | Bacteria,Proteobacteria,Betaproteobacter<br>ia,Burkholderiales,Sutterellaceae,Parasutt<br>erella,Parasutterella excrementihominis<br>4 erella,Parasutterella excrementihominis<br>Bacteria,Cyanobacteria,Oscillatoriohyphid<br>eae,Chroococcales,Gloeocapsa,Gloeocaps                                     |
| 442790313 | 122 | 718 | Cyanobacteria  | Gloeocapsa sp. PCC<br>73106                      | 24 a sp. PCC 73106<br>Bacteria,Firmicutes,Bacilli,Bacillales,Bacill<br>aceae,Anoxybacillus,Anoxybacillus<br>flavithermus,Anoxybacillus flavithermus                                                                                                                                                       |
| 432002280 | 118 | 719 | Firmicutes     | Anoxybacillus<br>flavithermus TNO-<br>09.006     | 8 TNO-09.006<br>Bacteria,Cyanobacteria,Oscillatoriohyphid<br>eae,Chroococcales,Microcystis,Microcystis                                                                                                                                                                                                    |
| 817701219 | 114 | 720 | Cyanobacteria  | Microcystis aeruginosa                           | 35 aeruginosa<br>Bacteria,Proteobacteria,Betaproteobacter<br>ia,Burkholderiales,Sutterellaceae,Parasutt<br>erella,Parasutterella                                                                                                                                                                          |
| 329570321 | 110 | 721 | Proteobacteria | Parasutterella<br>excrementihominis YIT<br>11859 | 6 excrementihominis YIT 11859                                                                                                                                                                                                                                                                             |
| 518324131 | 110 | 722 | Cyanobacteria  | Calothrix sp. PCC 7103                           | Bacteria,Cyanobacteria,Nostocales,Rivular<br>iaceae,Calothrix,Calothrix sp. PCC 7103<br>6 iaceae,Calothrix,Calothrix sp. PCC 7103<br>Bacteria,Firmicutes,Bacilli,Bacillales,Bacill<br>aceae,Amphibacillus,Amphibacillus                                                                                   |
| 516042537 | 109 | 723 | Firmicutes     | Amphibacillus jilinensis                         | 1 jilinensis                                                                                                                                                                                                                                                                                              |

|           |     |     |                     |                                                    |                                                                                                                                                                                                                           |
|-----------|-----|-----|---------------------|----------------------------------------------------|---------------------------------------------------------------------------------------------------------------------------------------------------------------------------------------------------------------------------|
| 329571485 | 108 | 724 | Proteobacteria      | Parasutterella<br>excrementihominis YIT<br>11859   | Bacteria,Proteobacteria,Betaproteobacter<br>ia,Burkholderiales,Sutterellaceae,Parasutt<br>erella,Parasutterella<br>excrementihominis,Parasutterella<br>6 excrementihominis YIT 11859                                      |
| 516150425 | 107 | 725 | Actinobacteria      | Nocardiopsis valliformis                           | Bacteria,Actinobacteria,Actinobacteria,Str<br>eptosporangiales,Nocardiopsaceae,Nocar<br>1 diopsis,Nocardiopsis valliformis                                                                                                |
| 809072688 | 107 | 726 | Cyanobacteria       | Arthrospira sp. TJS091                             | Bacteria,Cyanobacteria,Oscillatoriophycid<br>eae,Oscillatoriales,Arthrospira,Arthrospira<br>7 sp. TJS091                                                                                                                  |
| 493037492 | 106 | 727 | Cyanobacteria       | Coleofasciculus<br>chthonoplastes                  | Bacteria,Cyanobacteria,Oscillatoriophycid<br>eae,Oscillatoriales,Coleofasciculus,Coleofa<br>25 sciculus chthonoplastes                                                                                                    |
| 378597560 | 105 | 728 | Proteobacteria      | Sutterella parvirubra YIT<br>11816                 | Bacteria,Proteobacteria,Betaproteobacter<br>ia,Burkholderiales,Sutterellaceae,Sutterell<br>a,Sutterella parvirubra,Sutterella<br>2 parvirubra YIT 11816                                                                   |
| 652435818 | 105 | 729 | Firmicutes          | Exiguobacterium<br>antarcticum                     | Bacteria,Firmicutes,Bacilli,Bacillales,Bacill<br>ales incertae sedis,Bacillales Family XII.<br>Incertae<br>Sedis,Exiguobacterium,Exiguobacterium<br>3 antarcticum                                                         |
| 908364976 | 105 | 730 | Proteobacteria      | Candidatus Burkholderia<br>kirkii                  | Bacteria,Proteobacteria,Betaproteobacter<br>ia,Burkholderiales,Burkholderiaceae,Burk<br>1 holderia,Candidatus Burkholderia kirkii                                                                                         |
| 588475865 | 104 | 731 | Firmicutes          | Lactobacillus composti<br>DSM 18527 = JCM<br>14202 | Bacteria,Firmicutes,Bacilli,Lactobacillales,L<br>actobacillaceae,Lactobacillus,Lactobacillus<br>composti,Lactobacillus composti DSM<br>3 18527 = JCM 14202                                                                |
| 386780378 | 103 | 732 | unclassified sequen | microorganism<br>uncultured                        | unclassified sequences,environmental<br>1 samples,uncultured microorganism                                                                                                                                                |
| 339833897 | 102 | 733 | Proteobacteria      | Acidithiobacillus sp. GGI-<br>221                  | Bacteria,Proteobacteria,Gammaproteobac<br>teria,Acidithiobacillales,Acidithiobacillacea<br>e,Acidithiobacillus,Acidithiobacillus sp.<br>3 GGI-221                                                                         |
| 919167331 | 102 | 734 | Euryarchaeota       | Methanosarcina<br>lacustris                        | Archaea,Euryarchaeota,Methanomicrobia,<br>Methanosarcinales,Methanosarcinaceae,<br>60 Methanosarcina,Methanosarcina lacustris                                                                                             |
| 723292966 | 99  | 735 | Proteobacteria      | Candidatus<br>Thiomargarita nelsonii               | Bacteria,Proteobacteria,Gammaproteobac<br>teria,Thiotrichales,Thiotrichaceae,Thiomar<br>10 garita,Candidatus Thiomargarita nelsonii                                                                                       |
| 495461462 | 98  | 736 | Cyanobacteria       | Moorea producens                                   | Bacteria,Cyanobacteria,Oscillatoriophycid<br>eae,Oscillatoriales,Moorea,Moorea<br>19 producens                                                                                                                            |
| 738948970 | 97  | 737 | Cyanobacteria       | Planktothrix                                       | Bacteria,Cyanobacteria,Oscillatoriophycid<br>eae,Oscillatoriales,Planktothrix<br>8 eae,Oscillatoriales,Planktothrix                                                                                                       |
| 809068062 | 97  | 738 | Cyanobacteria       | Arthrospira sp. TJS091                             | Bacteria,Cyanobacteria,Oscillatoriophycid<br>eae,Oscillatoriales,Arthrospira,Arthrospira<br>7 sp. TJS091                                                                                                                  |
| 347588852 | 94  | 739 | Fibrobacteres/Acic  | Chloracidobacterium<br>thermophilum B              | Bacteria,Fibrobacteres/Acidobacteria<br>group,Acidobacteria,unclassified<br>Acidobacteria,Acidobacteria subdivision<br>4,Chloracidobacterium,Chloracidobacteriu<br>m thermophilum,Chloracidobacterium<br>2 thermophilum B |

|           |    |     |                |                                             |                                                                                                                                                                                                         |
|-----------|----|-----|----------------|---------------------------------------------|---------------------------------------------------------------------------------------------------------------------------------------------------------------------------------------------------------|
| 664453855 | 94 | 740 | Actinobacteria | Streptomyces sp. NRRL S-1824                | Bacteria,Actinobacteria,Actinobacteria,Streptomycetales,Streptomycetaceae,Streptomyces,Streptomyces sp. NRRL S-1824                                                                                     |
| 749573730 | 94 | 741 | Proteobacteria | Geoalkalibacter subterraneus                | Bacteria,Proteobacteria,delta/epsilon subdivisions,Deltaproteobacteria,Desulfuromonadales,Geobacteraceae,Geoalkalibacter,Geoalkalibacter subterraneus                                                   |
| 919167215 | 93 | 742 | Euryarchaeota  | Methanosarcina lacustris                    | Archaea,Euryarchaeota,Methanomicrobia,Methanosarcinales,Methanosarcinaceae,Methanosarcina,Methanosarcina lacustris                                                                                      |
| 432001269 | 92 | 743 | Firmicutes     | Anoxybacillus flavithermus TNO-09.006       | Bacteria,Firmicutes,Bacilli,Bacillales,Bacillaceae,Anoxybacillus,Anoxybacillus flavithermus,Anoxybacillus flavithermus                                                                                  |
| 530928122 | 92 | 744 | Nitrospirae    | Leptospirillum sp. Group IV 'UBA BS'        | Bacteria,Nitrospirae,Nitrospira,Nitrospirales,Nitrospiraceae,Leptospirillum,Leptospirillum sp. Group IV,Leptospirillum sp. Group IV 'UBA BS'                                                            |
| 825923929 | 89 | 745 | Firmicutes     | Aneurinibacillus tyrosinisolvans            | Bacteria,Firmicutes,Bacilli,Bacillales,Paenibacillaceae,Aneurinibacillus group,Aneurinibacillus,Aneurinibacillus tyrosinisolvans                                                                        |
| 898220383 | 89 | 746 | Cyanobacteria  | Limnoraphis robusta                         | Bacteria,Cyanobacteria,Oscillatoriophyceae,Oscillatoriales,Limnoraphis,Limnoraphis robusta                                                                                                              |
| 442790314 | 88 | 747 | Cyanobacteria  | Gloeocapsa sp. PCC 73106                    | Bacteria,Cyanobacteria,Oscillatoriophyceae,Chroococcales,Gloeocapsa,Gloeocapsa sp. PCC 73106                                                                                                            |
| 919175030 | 87 | 748 | Euryarchaeota  | Methanosarcina horonobensis                 | Archaea,Euryarchaeota,Methanomicrobia,Methanosarcinales,Methanosarcinaceae,Methanosarcina,Methanosarcina horonobensis                                                                                   |
| 516353505 | 86 | 749 | Cyanobacteria  | Scytonema hofmanni                          | Bacteria,Cyanobacteria,Nostocales,Scytonemataceae,Scytonema,Scytonema hofmanni                                                                                                                          |
| 754794025 | 85 | 750 | Cyanobacteria  | Planktothrix agardhii                       | Bacteria,Cyanobacteria,Oscillatoriophyceae,Oscillatoriales,Planktothrix,Planktothrix agardhii                                                                                                           |
| 407874586 | 82 | 751 | Firmicutes     | Lactobacillus equicursoris 66c              | Bacteria,Firmicutes,Bacilli,Lactobacillales,Lactobacillaceae,Lactobacillus,Lactobacillus equicursoris,Lactobacillus equicursoris 66c                                                                    |
| 389833116 | 75 | 752 | Cyanobacteria  | Microcystis aeruginosa PCC 9809             | Bacteria,Cyanobacteria,Oscillatoriophyceae,Chroococcales,Microcystis,Microcystis aeruginosa,Microcystis aeruginosa PCC 9809                                                                             |
| 442787585 | 75 | 753 | Cyanobacteria  | Gloeocapsa sp. PCC 73106                    | Bacteria,Cyanobacteria,Oscillatoriophyceae,Chroococcales,Gloeocapsa,Gloeocapsa sp. PCC 73106                                                                                                            |
| 910241825 | 75 | 754 | Cyanobacteria  | Tolypothrix bouteillei                      | Bacteria,Cyanobacteria,Nostocales,Microchaetaceae,Tolypothrix,Tolypothrix bouteillei                                                                                                                    |
| 577004405 | 74 | 755 | Proteobacteria | Candidatus Contendobacter odensis Run_B_J11 | Bacteria,Proteobacteria,Gammaproteobacteria,unclassified Gammaproteobacteria,Competibacteraceae,Candidatus Contendobacter,Candidatus Contendobacter odensis,Candidatus Contendobacter odensis Run_B_J11 |

|           |    |     |               |                                         |                                                                                                                                                        |
|-----------|----|-----|---------------|-----------------------------------------|--------------------------------------------------------------------------------------------------------------------------------------------------------|
| 658298958 | 67 | 756 | Cyanobacteria | Planktothrix agardhii<br>NIVA-CYA 126/8 | Bacteria,Cyanobacteria,Oscillatoriophycid<br>eae,Oscillatoriales,Planktothrix,Planktothrix<br>agardhii,Planktothrix agardhii NIVA-CYA<br>1 126/8       |
| 251773296 | 66 | 757 | Nitrospirae   | Leptospirillum<br>ferrodiazotrophum     | Bacteria,Nitrospirae,Nitrospira,Nitrospirales,<br>Nitrospiraceae,Leptospirillum,Leptospirillum<br>sp. Group III,Leptospirillum<br>14 ferrodiazotrophum |
| 752561796 | 62 | 758 | Cyanobacteria | Cylindrospermum<br>stagnale             | Bacteria,Cyanobacteria,Nostocales,Nostocaceae,<br>Cylindrospermum,Cylindrospermum<br>2 m stagnale                                                      |
| 332353787 | 61 | 759 | Cyanobacteria | Moorea producens 3L                     | Bacteria,Cyanobacteria,Oscillatoriophycid<br>eae,Oscillatoriales,Moorea,Moorea<br>12 producens,Moorea producens 3L                                     |
| 406710894 | 56 | 760 | Cyanobacteria | Arthrospira platensis C1                | Bacteria,Cyanobacteria,Oscillatoriophycid<br>eae,Oscillatoriales,Arthrospira,Arthrospira<br>3 platensis,Arthrospira platensis C1                       |
| 291567395 | 51 | 761 | Cyanobacteria | Arthrospira platensis<br>NIES-39        | Bacteria,Cyanobacteria,Oscillatoriophycid<br>eae,Oscillatoriales,Arthrospira,Arthrospira<br>2 platensis,Arthrospira platensis NIES-39                  |



Supplementary Table 2

| Genome                                  | Phylum            | COG3513<br>(Cas9) | pfam14239<br>(RRxRR or<br>ISC) | COG0675<br>(IS605,<br>TnpB) | COG1943 (Y1<br>tyrosine<br>recombinase) | COG2452<br>(Serine<br>transposase) |    |
|-----------------------------------------|-------------------|-------------------|--------------------------------|-----------------------------|-----------------------------------------|------------------------------------|----|
| Acidilobus_saccharovorans_345_15_uid5   | Acidilobales      | 0                 | 0                              | 0                           | 1                                       | 0                                  | 2  |
| Caldisphaera_lagunensis_DSM_15908_uic   | Acidilobales      | 0                 | 0                              | 0                           | 0                                       | 0                                  | 0  |
| Aeropyrum_camini_SY1____JCM_12091_u     | Desulfurococcales | 0                 | 0                              | 0                           | 1                                       | 0                                  | 1  |
| Aeropyrum_ Pernix_K1_uid57757           | Desulfurococcales | 0                 | 0                              | 0                           | 1                                       | 0                                  | 0  |
| Desulfurococcus_fermentans_DSM_1653     | Desulfurococcales | 0                 | 0                              | 0                           | 1                                       | 0                                  | 0  |
| Desulfurococcus_kamchatkensis_1221n_u   | Desulfurococcales | 0                 | 0                              | 0                           | 8                                       | 1                                  | 17 |
| Desulfurococcus_mucosus_DSM_2162_ui     | Desulfurococcales | 0                 | 0                              | 0                           | 6                                       | 0                                  | 2  |
| Ignicoccus_hospitalis_KIN4_I_uid58365   | Desulfurococcales | 0                 | 0                              | 0                           | 0                                       | 0                                  | 0  |
| Ignisphaera_aggregans_DSM_17230_uid5    | Desulfurococcales | 0                 | 0                              | 0                           | 3                                       | 0                                  | 0  |
| Staphylothermus_hellenicus_DSM_12710    | Desulfurococcales | 0                 | 0                              | 0                           | 6                                       | 0                                  | 2  |
| Staphylothermus_marinus_F1_uid58719     | Desulfurococcales | 0                 | 0                              | 0                           | 5                                       | 0                                  | 1  |
| Thermogladius_1633_uid167488            | Desulfurococcales | 0                 | 0                              | 0                           | 4                                       | 0                                  | 5  |
| Thermosphaera_aggregans_DSM_11486_      | Desulfurococcales | 0                 | 0                              | 0                           | 1                                       | 0                                  | 2  |
| Hyperthermus_butylicus_DSM_5456_uid5    | Desulfurococcales | 0                 | 0                              | 0                           | 1                                       | 0                                  | 0  |
| Pyrolobus_fumariorum_1A_uid73415        | Desulfurococcales | 0                 | 0                              | 0                           | 1                                       | 0                                  | 0  |
| Fervidicoccus_fontis_Kam940_uid162201   | Fervidicoccales   | 0                 | 0                              | 0                           | 1                                       | 0                                  | 0  |
| Acidianus_hospitalis_W1_uid66875        | Sulfolobales      | 0                 | 0                              | 0                           | 17                                      | 0                                  | 8  |
| Metallosphaera_cuprina_Ar_4_uid66329    | Sulfolobales      | 0                 | 0                              | 0                           | 1                                       | 0                                  | 0  |
| Metallosphaera_sedula_DSM_5348_uid5     | Sulfolobales      | 0                 | 0                              | 0                           | 4                                       | 1                                  | 2  |
| Sulfolobus_acidocaldarius_DSM_639_uid5  | Sulfolobales      | 0                 | 0                              | 0                           | 5                                       | 0                                  | 2  |
| Sulfolobus_acidocaldarius_N8_uid189027  | Sulfolobales      | 0                 | 0                              | 0                           | 5                                       | 0                                  | 2  |
| Sulfolobus_acidocaldarius_Ron12_I_uid18 | Sulfolobales      | 0                 | 0                              | 0                           | 5                                       | 0                                  | 2  |
| Sulfolobus_acidocaldarius_SUSAZ_uid232  | Sulfolobales      | 0                 | 0                              | 0                           | 4                                       | 0                                  | 0  |
| Sulfolobus_islandicus_HVE10_4_uid1620   | Sulfolobales      | 0                 | 0                              | 0                           | 23                                      | 4                                  | 2  |
| Sulfolobus_islandicus_L_D_8_5_uid43679  | Sulfolobales      | 0                 | 0                              | 0                           | 14                                      | 6                                  | 15 |
| Sulfolobus_islandicus_L_S_2_15_uid5887  | Sulfolobales      | 0                 | 0                              | 0                           | 13                                      | 7                                  | 10 |
| Sulfolobus_islandicus_LAL14_1_uid19721  | Sulfolobales      | 0                 | 0                              | 0                           | 12                                      | 4                                  | 0  |
| Sulfolobus_islandicus_M_14_25_uid5884   | Sulfolobales      | 0                 | 0                              | 0                           | 5                                       | 2                                  | 2  |
| Sulfolobus_islandicus_M_16_27_uid5885   | Sulfolobales      | 0                 | 0                              | 0                           | 6                                       | 2                                  | 0  |
| Sulfolobus_islandicus_M_16_4_uid58841   | Sulfolobales      | 0                 | 0                              | 0                           | 13                                      | 4                                  | 3  |
| Sulfolobus_islandicus_REY15A_uid162071  | Sulfolobales      | 0                 | 0                              | 0                           | 30                                      | 7                                  | 2  |
| Sulfolobus_islandicus_Y_G_57_14_uid588  | Sulfolobales      | 0                 | 0                              | 0                           | 22                                      | 0                                  | 26 |
| Sulfolobus_islandicus_Y_N_15_51_uid588  | Sulfolobales      | 0                 | 0                              | 0                           | 21                                      | 0                                  | 35 |
| Sulfolobus_solfataricus_98_2_uid167998  | Sulfolobales      | 0                 | 0                              | 0                           | 23                                      | 1                                  | 20 |
| Sulfolobus_solfataricus_P2_uid57721     | Sulfolobales      | 0                 | 0                              | 0                           | 42                                      | 2                                  | 40 |
| Sulfolobus_tokodaii_7_uid57807          | Sulfolobales      | 0                 | 0                              | 0                           | 20                                      | 7                                  | 8  |
| Thermofilum_pendens_Hrk_5_uid58563      | Thermoproteales   | 0                 | 0                              | 0                           | 0                                       | 0                                  | 0  |
| Thermofilum_1910b_uid215374             | Thermoproteales   | 0                 | 0                              | 0                           | 0                                       | 0                                  | 0  |
| Caldvirga_maquilingensis_IC_167_uid587  | Thermoproteales   | 0                 | 0                              | 0                           | 5                                       | 0                                  | 2  |
| Pyrobaculum_aerophilum_IM2_uid57727     | Thermoproteales   | 0                 | 0                              | 0                           | 5                                       | 0                                  | 0  |
| Pyrobaculum_arsenicum_DSM_13514_        | Thermoproteales   | 0                 | 0                              | 0                           | 1                                       | 0                                  | 0  |
| Pyrobaculum_calidifontis_JCM_11548_uic  | Thermoproteales   | 0                 | 0                              | 0                           | 3                                       | 0                                  | 0  |
| Pyrobaculum_islandicum_DSM_4184_uid     | Thermoproteales   | 0                 | 0                              | 0                           | 41                                      | 0                                  | 0  |
| Pyrobaculum_neutrophilum_V24Sta_uid5    | Thermoproteales   | 0                 | 0                              | 0                           | 6                                       | 0                                  | 0  |
| Pyrobaculum_oguniense_TE7_uid84411      | Thermoproteales   | 0                 | 0                              | 0                           | 3                                       | 0                                  | 0  |
| Pyrobaculum_1860_uid82379               | Thermoproteales   | 0                 | 0                              | 0                           | 10                                      | 0                                  | 0  |
| Thermoproteus_tenax_Kra_1_uid74443      | Thermoproteales   | 0                 | 0                              | 0                           | 9                                       | 0                                  | 0  |
| Thermoproteus_uzoniensis_768_20_uid6    | Thermoproteales   | 0                 | 0                              | 0                           | 1                                       | 0                                  | 0  |
| Vulcanisaeta_distributa_DSM_14429_uid1  | Thermoproteales   | 0                 | 0                              | 0                           | 2                                       | 0                                  | 0  |
| Vulcanisaeta_moutnovskia_768_28_uid6    | Thermoproteales   | 0                 | 0                              | 0                           | 10                                      | 1                                  | 0  |
| Archaeoglobus_fulgidus_DSM_4304_uid5    | Archaeoglobi      | 0                 | 0                              | 0                           | 0                                       | 0                                  | 0  |

|                                        |                 |   |   |    |   |   |
|----------------------------------------|-----------------|---|---|----|---|---|
| Archaeoglobus_profundus_DSM_5631_uid   | Archaeoglobi    | 0 | 0 | 9  | 1 | 2 |
| Archaeoglobus_sulfaticallidus_PM70_1_u | Archaeoglobi    | 0 | 0 | 15 | 3 | 0 |
| Archaeoglobus_veneficus_SNP6_uid6526   | Archaeoglobi    | 0 | 0 | 3  | 0 | 0 |
| Ferroglobus_placidus_DSM_10642_uid40   | Archaeoglobi    | 0 | 0 | 1  | 0 | 2 |
| Halalkalicoccus_jeotgali_B3_uid50305   | Halobacteria    | 0 | 0 | 3  | 1 | 0 |
| Haloarcula_hispanica_ATCC_33960_uid72  | Halobacteria    | 0 | 0 | 4  | 1 | 0 |
| Haloarcula_hispanica_N601_uid230920    | Halobacteria    | 0 | 0 | 5  | 1 | 0 |
| Haloarcula_marismortui_ATCC_43049_uid  | Halobacteria    | 0 | 0 | 13 | 2 | 0 |
| Halobacterium_salinarum_R1_uid61571    | Halobacteria    | 0 | 0 | 12 | 4 | 0 |
| Halobacterium_NRC_1_uid57769           | Halobacteria    | 0 | 0 | 10 | 4 | 0 |
| Haloferax_mediterranei_ATCC_33500_uic  | Halobacteria    | 0 | 0 | 6  | 1 | 0 |
| Haloferax_volcanii_DS2_uid46845        | Halobacteria    | 0 | 0 | 7  | 2 | 0 |
| Halogeometricum_borinquense_DSM_11     | Halobacteria    | 0 | 0 | 16 | 2 | 0 |
| Halomicrobium_mukohataei_DSM_12286     | Halobacteria    | 0 | 0 | 8  | 3 | 0 |
| Halopiger_xanaduensis_SH_6_uid68105    | Halobacteria    | 0 | 0 | 1  | 0 | 0 |
| Haloquadratum_walsbyi_C23_uid162019    | Halobacteria    | 0 | 0 | 5  | 0 | 0 |
| Haloquadratum_walsbyi_DSM_16790_uic    | Halobacteria    | 0 | 0 | 21 | 1 | 2 |
| Halorhabdus_tiamatea_SARL4B_uid21408   | Halobacteria    | 0 | 0 | 23 | 4 | 0 |
| Halorhabdus_utahensis_DSM_12940_uid    | Halobacteria    | 0 | 0 | 9  | 1 | 0 |
| Halorubrum_lacusprofundi_ATCC_49239    | Halobacteria    | 0 | 0 | 23 | 9 | 0 |
| Haloterrigena_turkmenica_DSM_5511_uid  | Halobacteria    | 0 | 0 | 7  | 0 | 0 |
| Halovivax_ruber_XH_70_uid184819        | Halobacteria    | 0 | 0 | 5  | 1 | 0 |
| Natrialba_magadii_ATCC_43099_uid4624   | Halobacteria    | 0 | 0 | 21 | 1 | 2 |
| Natrinema_pellirubrum_DSM_15624_uid    | Halobacteria    | 0 | 0 | 18 | 1 | 0 |
| Natrinema_J7_uid171337                 | Halobacteria    | 0 | 0 | 3  | 0 | 0 |
| Natronobacterium_gregoryi_SP2_uid744   | Halobacteria    | 0 | 0 | 10 | 2 | 0 |
| Natronococcus_occultus_SP4_uid184863   | Halobacteria    | 0 | 0 | 13 | 0 | 0 |
| Natronomonas_moolapensis_8_8_11_uid    | Halobacteria    | 0 | 0 | 15 | 4 | 0 |
| Natronomonas_pharaonis_DSM_2160_uid    | Halobacteria    | 0 | 0 | 36 | 3 | 0 |
| Salinarchaeum_laminariae_Harcht_Bsk1   | Halobacteria    | 0 | 0 | 0  | 0 | 0 |
| Methanobacterium_AL_21_uid63623        | Methanobacteria | 0 | 0 | 0  | 0 | 0 |
| Methanobacterium_MB1_uid231690         | Methanobacteria | 0 | 0 | 0  | 0 | 0 |
| Methanobacterium_SWAN_1_uid67359       | Methanobacteria | 0 | 0 | 0  | 0 | 0 |
| Methanobrevibacter_ruminantium_M1_u    | Methanobacteria | 0 | 0 | 0  | 0 | 0 |
| Methanobrevibacter_smithii_ATCC_3506   | Methanobacteria | 0 | 0 | 1  | 0 | 0 |
| Methanobrevibacter_AbM4_uid206516      | Methanobacteria | 0 | 0 | 0  | 0 | 0 |
| Methanosphaera_stadtmanae_DSM_309      | Methanobacteria | 0 | 0 | 1  | 0 | 0 |
| Methanothermobacter_marburgensis_M     | Methanobacteria | 0 | 0 | 0  | 0 | 0 |
| Methanothermobacter_thermautotrophic   | Methanobacteria | 0 | 0 | 0  | 0 | 0 |
| Methanothermus_fervidus_DSM_2088_u     | Methanobacteria | 0 | 0 | 1  | 0 | 0 |
| Methanocaldococcus_fervens_AG86_uid    | Methanococci    | 0 | 0 | 1  | 0 | 2 |
| Methanocaldococcus_infernus_ME_uid48   | Methanococci    | 0 | 0 | 0  | 0 | 0 |
| Methanocaldococcus_jannaschii_DSM_26   | Methanococci    | 0 | 0 | 3  | 0 | 2 |
| Methanocaldococcus_FS406_22_uid4249    | Methanococci    | 0 | 0 | 9  | 1 | 2 |
| Methanocaldococcus_vulcanius_M7_uid4   | Methanococci    | 0 | 0 | 2  | 0 | 0 |
| Methanotorris_igneus_Kol_5_uid67321    | Methanococci    | 0 | 0 | 10 | 0 | 8 |
| Methanococcus_aeolicus_Nankai_3_uid5   | Methanococci    | 0 | 0 | 3  | 0 | 0 |
| Methanococcus_maripaludis_C5_uid5874   | Methanococci    | 0 | 0 | 0  | 0 | 0 |
| Methanococcus_maripaludis_C6_uid5894   | Methanococci    | 0 | 0 | 0  | 0 | 0 |
| Methanococcus_maripaludis_C7_uid5884   | Methanococci    | 0 | 0 | 0  | 0 | 0 |
| Methanococcus_maripaludis_S2_uid5803   | Methanococci    | 0 | 0 | 0  | 0 | 0 |
| Methanococcus_maripaludis_X1_uid7072   | Methanococci    | 0 | 0 | 0  | 0 | 0 |
| Methanococcus_vannielii_SB_uid58767    | Methanococci    | 0 | 0 | 0  | 0 | 0 |
| Methanococcus_voltae_A3_uid49529       | Methanococci    | 0 | 0 | 0  | 0 | 0 |
| Methanothermococcus_okinawensis_IH1    | Methanococci    | 0 | 0 | 1  | 0 | 0 |
| Methanocella_arvoryzae_MRE50_uid616    | Methanomicrobia | 0 | 0 | 0  | 0 | 0 |

|                                                             |   |   |    |    |    |
|-------------------------------------------------------------|---|---|----|----|----|
| Methanocella_conradii_HZ254_uid15791: Methanomicrobia       | 0 | 0 | 10 | 2  | 0  |
| Methanocella_paludicola_SANAE_uid428: Methanomicrobia       | 0 | 0 | 0  | 0  | 0  |
| Methanocorpusculum_labreanum_Z_uid5: Methanomicrobia        | 0 | 0 | 0  | 0  | 0  |
| Methanoculleus_bourgensis_MS2_uid171: Methanomicrobia       | 0 | 0 | 12 | 0  | 0  |
| Methanoculleus_marisnigri_JR1_uid5856: Methanomicrobia      | 0 | 0 | 0  | 0  | 0  |
| Methanoplanus_petrolearius_DSM_1157: Methanomicrobia        | 0 | 0 | 1  | 0  | 1  |
| Methanoregula_boonei_6A8_uid58815: Methanomicrobia          | 0 | 0 | 1  | 0  | 0  |
| Methanoregula_formicicum_SMSP_uid18: Methanomicrobia        | 0 | 0 | 0  | 0  | 1  |
| Methanosphaerula_palustris_E1_9c_uid5: Methanomicrobia      | 0 | 0 | 0  | 0  | 0  |
| Methanospirillum_hungatei_JF_1_uid581: Methanomicrobia      | 0 | 0 | 0  | 0  | 0  |
| Methanosaeta_concillii_GP6_uid66207: Methanomicrobia        | 0 | 0 | 40 | 6  | 0  |
| Methanosaeta_harundinacea_6Ac_uid81: Methanomicrobia        | 0 | 0 | 8  | 1  | 0  |
| Methanosaeta_thermophila_PT_uid5846: Methanomicrobia        | 0 | 0 | 2  | 0  | 0  |
| Methanococcoides_burtonii_DSM_6242: Methanomicrobia         | 0 | 0 | 4  | 0  | 0  |
| Methanohalobium_vestigatum_Z_7303: Methanomicrobia          | 0 | 5 | 60 | 2  | 6  |
| Methanohalophilus_mahii_DSM_5219: Methanomicrobia           | 0 | 0 | 4  | 0  | 0  |
| Methanolobus_psychrophilus_R15_uid17: Methanomicrobia       | 0 | 0 | 16 | 2  | 0  |
| Methanomethylovorans_hollandica_DSM: Methanomicrobia        | 0 | 0 | 18 | 3  | 0  |
| Methanosalsum_zhilinae_DSM_4017_uid: Methanomicrobia        | 0 | 0 | 5  | 1  | 0  |
| Methanosarcina_acetivorans_C2A_uid57: Methanomicrobia       | 0 | 0 | 6  | 2  | 0  |
| Methanosarcina_barkeri_Fusaro_uid5771: Methanomicrobia      | 0 | 0 | 16 | 20 | 0  |
| Methanosarcina_mazei_Go1_uid57893: Methanomicrobia          | 0 | 0 | 5  | 14 | 0  |
| Methanosarcina_mazei_Tuc01_uid19018: Methanomicrobia        | 0 | 0 | 1  | 3  | 0  |
| Methanomassiliicoccus_Mx1_Issoire_uid2: Methanomicrobia     | 0 | 0 | 0  | 0  | 0  |
| Methanopyrus_kandleri_AV19_uid57883: Methanopyri            | 0 | 0 | 1  | 0  | 0  |
| Pyrococcus_abyssi_GE5_uid62903: Thermococci                 | 0 | 0 | 3  | 0  | 2  |
| Pyrococcus_furiosus_COM1_uid169620: Thermococci             | 0 | 0 | 5  | 0  | 2  |
| Pyrococcus_furiosus_DSM_3638_uid5787: Thermococci           | 0 | 0 | 6  | 0  | 5  |
| Pyrococcus_horikoshii_OT3_uid57753: Thermococci             | 0 | 0 | 2  | 0  | 0  |
| Pyrococcus_NA2_uid66551: Thermococci                        | 0 | 0 | 3  | 1  | 4  |
| Pyrococcus_ST04_uid167261: Thermococci                      | 0 | 0 | 3  | 0  | 4  |
| Pyrococcus_yayanosii_CH1_uid68281: Thermococci              | 0 | 0 | 4  | 2  | 2  |
| Thermococcus_barophilus_MP_uid54733: Thermococci            | 0 | 0 | 5  | 0  | 0  |
| Thermococcus_gammatolerans_EJ3_uid5: Thermococci            | 0 | 0 | 0  | 0  | 0  |
| Thermococcus_kodakarensis_KOD1_uid5: Thermococci            | 0 | 0 | 6  | 1  | 4  |
| Thermococcus_litoralis_DSM_5473_uid82: Thermococci          | 0 | 0 | 12 | 1  | 10 |
| Thermococcus_onnurineus_NA1_uid5904: Thermococci            | 0 | 0 | 1  | 0  | 0  |
| Thermococcus_sibiricus_MM_739_uid59: Thermococci            | 0 | 0 | 6  | 1  | 4  |
| Thermococcus_4557_uid70841: Thermococci                     | 0 | 0 | 1  | 0  | 0  |
| Thermococcus_AM4_uid54735: Thermococci                      | 0 | 0 | 4  | 0  | 2  |
| Thermococcus_CL1_uid168259: Thermococci                     | 0 | 0 | 2  | 0  | 2  |
| Ferroplasma_acidarmanus_fer1_uid5409: Thermoplasmata        | 0 | 0 | 11 | 1  | 0  |
| Picrophilus_torridus_DSM_9790_uid5804: Thermoplasmata       | 0 | 0 | 0  | 0  | 0  |
| Thermoplasma_acidophilum_DSM_1728: Thermoplasmata           | 0 | 0 | 5  | 1  | 2  |
| Thermoplasma_volcanium_GSS1_uid5775: Thermoplasmata         | 0 | 0 | 14 | 3  | 4  |
| Thermoplasmatales_archaeon_BRNA1_uid: Thermoplasmata        | 0 | 0 | 0  | 0  | 0  |
| Aciduliprofundum_boonei_T469_uid4333: unclassified Euryarch | 0 | 0 | 0  | 0  | 0  |
| Aciduliprofundum_MAR08_339_uid1844: unclassified Euryarch   | 0 | 0 | 0  | 0  | 0  |
| archaeon_Mx1201_uid196597: unclassified Euryarch            | 0 | 0 | 1  | 0  | 0  |
| Candidatus_Korarchaeum_cryptofilum_O: Korarchaeota          | 0 | 0 | 4  | 0  | 2  |
| Nanoarchaeum_equitans_Kin4_M_uid58: Nanoarchaeota           | 0 | 0 | 0  | 0  | 0  |
| Cenarchaeum_symbiosum_A_uid61411: Thaumarchaeota            | 0 | 0 | 0  | 0  | 0  |
| Candidatus_Nitrosopumilus_koreensis_Af: Thaumarchaeota      | 0 | 0 | 1  | 0  | 0  |
| Candidatus_Nitrosopumilus_AR2_uid176: Thaumarchaeota        | 0 | 0 | 0  | 0  | 0  |
| Nitrosopumilus_maritimus_SCM1_uid589: Thaumarchaeota        | 0 | 0 | 0  | 0  | 0  |
| Candidatus_Nitrososphaera_gargensis_G: Thaumarchaeota       | 0 | 0 | 41 | 3  | 0  |

|                                        |                      |   |   |    |   |   |
|----------------------------------------|----------------------|---|---|----|---|---|
| Candidatus_Caldiarchaeum_subterraneum  | Thaumarchaeota       | 0 | 0 | 0  | 0 | 1 |
| halophilic_archaeon_DL31_uid72619      | unclassified Archaea | 0 | 0 | 21 | 1 | 0 |
| Acidimicrobium_ferrooxidans_DSM_1033   | Actinobacteria       | 0 | 0 | 1  | 0 | 3 |
| Acidimicrobidae_bacterium_YM16_304     | Actinobacteria       | 0 | 0 | 0  | 5 | 0 |
| Arcanobacterium_haemolyticum_DSM_21    | Actinobacteria       | 0 | 0 | 0  | 0 | 2 |
| Mobiluncus_curtisii_ATCC_43063_uid496  | Actinobacteria       | 0 | 0 | 0  | 0 | 1 |
| Catenulispora_acidiphila_DSM_44928_uid | Actinobacteria       | 0 | 0 | 1  | 0 | 1 |
| Corynebacterium_argentoratense_DSM_4   | Actinobacteria       | 0 | 0 | 0  | 0 | 0 |
| Corynebacterium_aurimucosum_ATCC_71    | Actinobacteria       | 0 | 0 | 0  | 0 | 0 |
| Corynebacterium_callunae_DSM_20147     | Actinobacteria       | 0 | 0 | 0  | 0 | 0 |
| Corynebacterium_diphtheriae_241_uid83  | Actinobacteria       | 1 | 0 | 0  | 0 | 0 |
| Corynebacterium_diphtheriae_31A_uid84  | Actinobacteria       | 1 | 0 | 0  | 0 | 0 |
| Corynebacterium_diphtheriae_BH8_uid84  | Actinobacteria       | 1 | 0 | 0  | 0 | 0 |
| Corynebacterium_diphtheriae_C7_beta    | Actinobacteria       | 1 | 0 | 0  | 0 | 0 |
| Corynebacterium_diphtheriae_CDCE_839   | Actinobacteria       | 0 | 0 | 0  | 0 | 0 |
| Corynebacterium_diphtheriae_HC01_uid8  | Actinobacteria       | 1 | 0 | 0  | 0 | 0 |
| Corynebacterium_diphtheriae_HC02_uid8  | Actinobacteria       | 1 | 0 | 0  | 0 | 0 |
| Corynebacterium_diphtheriae_HC03_uid8  | Actinobacteria       | 0 | 0 | 0  | 0 | 0 |
| Corynebacterium_diphtheriae_HC04_uid8  | Actinobacteria       | 0 | 0 | 0  | 0 | 0 |
| Corynebacterium_diphtheriae_INCA_402   | Actinobacteria       | 0 | 0 | 0  | 0 | 0 |
| Corynebacterium_diphtheriae_NCTC_131   | Actinobacteria       | 1 | 0 | 0  | 0 | 0 |
| Corynebacterium_diphtheriae_PW8_uid8   | Actinobacteria       | 0 | 0 | 0  | 0 | 0 |
| Corynebacterium_diphtheriae_VA01_uid8  | Actinobacteria       | 1 | 0 | 0  | 0 | 0 |
| Corynebacterium_efficiens_YS_314_uid62 | Actinobacteria       | 0 | 0 | 0  | 0 | 1 |
| Corynebacterium_glutamicum_ATCC_130    | Actinobacteria       | 0 | 0 | 0  | 0 | 0 |
| Corynebacterium_glutamicum_ATCC_130    | Actinobacteria       | 0 | 0 | 0  | 0 | 0 |
| Corynebacterium_glutamicum_ATCC_130    | Actinobacteria       | 0 | 0 | 0  | 0 | 0 |
| Corynebacterium_glutamicum_MB001_uid   | Actinobacteria       | 0 | 0 | 0  | 0 | 0 |
| Corynebacterium_glutamicum_R_uid588    | Actinobacteria       | 0 | 0 | 0  | 0 | 0 |
| Corynebacterium_glutamicum_SCgG1_uid   | Actinobacteria       | 0 | 0 | 0  | 0 | 0 |
| Corynebacterium_glutamicum_SCgG2_uid   | Actinobacteria       | 0 | 0 | 0  | 0 | 0 |
| Corynebacterium_halotolerans_YIM_700   | Actinobacteria       | 0 | 0 | 0  | 0 | 0 |
| Corynebacterium_jeikeium_K411_uid583   | Actinobacteria       | 0 | 0 | 0  | 0 | 0 |
| Corynebacterium_kroppenstedtii_DSM_4   | Actinobacteria       | 0 | 0 | 0  | 0 | 0 |
| Corynebacterium_maris_DSM_45190_uid    | Actinobacteria       | 0 | 0 | 2  | 0 | 0 |
| Corynebacterium_pseudotuberculosis_1   | Actinobacteria       | 0 | 0 | 0  | 0 | 0 |
| Corynebacterium_pseudotuberculosis_10  | Actinobacteria       | 0 | 0 | 0  | 0 | 0 |
| Corynebacterium_pseudotuberculosis_25  | Actinobacteria       | 0 | 0 | 0  | 0 | 0 |
| Corynebacterium_pseudotuberculosis_26  | Actinobacteria       | 0 | 0 | 0  | 0 | 0 |
| Corynebacterium_pseudotuberculosis_3   | Actinobacteria       | 0 | 0 | 0  | 0 | 0 |
| Corynebacterium_pseudotuberculosis_31  | Actinobacteria       | 0 | 0 | 0  | 0 | 0 |
| Corynebacterium_pseudotuberculosis_31  | Actinobacteria       | 0 | 0 | 0  | 0 | 0 |
| Corynebacterium_pseudotuberculosis_42  | Actinobacteria       | 0 | 0 | 0  | 0 | 0 |
| Corynebacterium_pseudotuberculosis_C2  | Actinobacteria       | 0 | 0 | 0  | 0 | 0 |
| Corynebacterium_pseudotuberculosis_CII | Actinobacteria       | 0 | 0 | 0  | 0 | 0 |
| Corynebacterium_pseudotuberculosis_Cp  | Actinobacteria       | 0 | 0 | 0  | 0 | 0 |
| Corynebacterium_pseudotuberculosis_FR  | Actinobacteria       | 0 | 0 | 0  | 0 | 0 |
| Corynebacterium_pseudotuberculosis_I1  | Actinobacteria       | 0 | 0 | 0  | 0 | 0 |
| Corynebacterium_pseudotuberculosis_P5  | Actinobacteria       | 0 | 0 | 0  | 0 | 0 |
| Corynebacterium_pseudotuberculosis_PA  | Actinobacteria       | 0 | 0 | 0  | 0 | 0 |
| Corynebacterium_resistens_DSM_45100    | Actinobacteria       | 0 | 0 | 0  | 0 | 0 |
| Corynebacterium_terpenotabidum_Y_11    | Actinobacteria       | 0 | 0 | 0  | 0 | 2 |
| Corynebacterium_ulcerans_0102_uid169   | Actinobacteria       | 0 | 0 | 0  | 0 | 0 |
| Corynebacterium_ulcerans_809_uid1596   | Actinobacteria       | 0 | 0 | 0  | 0 | 0 |
| Corynebacterium_ulcerans_BR_AD22_uid   | Actinobacteria       | 0 | 0 | 0  | 0 | 0 |
| Corynebacterium_urealyticum_DSM_710    | Actinobacteria       | 0 | 0 | 0  | 0 | 0 |

|                                       |                |   |   |   |   |    |
|---------------------------------------|----------------|---|---|---|---|----|
| Corynebacterium_urealyticum_DSM_711   | Actinobacteria | 0 | 0 | 0 | 0 | 0  |
| Corynebacterium_variabile_DSM_44702   | Actinobacteria | 0 | 0 | 0 | 0 | 0  |
| Gordonia_bronchialis_DSM_43247_uid41  | Actinobacteria | 0 | 0 | 0 | 0 | 0  |
| Gordonia_polyisoprenivorans_VH2_uid86 | Actinobacteria | 0 | 0 | 1 | 0 | 0  |
| Gordonia_KTR9_uid174812               | Actinobacteria | 0 | 0 | 0 | 0 | 0  |
| Amycolobicoccus_subflavus_DQS3_9A1_ui | Actinobacteria | 0 | 0 | 4 | 0 | 8  |
| Mycobacterium_avium_104_uid57693      | Actinobacteria | 0 | 0 | 1 | 1 | 0  |
| Mycobacterium_avium_paratuberculosis  | Actinobacteria | 0 | 0 | 0 | 0 | 0  |
| Mycobacterium_avium_paratuberculosis  | Actinobacteria | 0 | 0 | 0 | 0 | 0  |
| Mycobacterium_indicus_pranii_MTCC_95  | Actinobacteria | 0 | 0 | 0 | 0 | 0  |
| Mycobacterium_intracellulare_ATCC_139 | Actinobacteria | 0 | 0 | 0 | 0 | 0  |
| Mycobacterium_intracellulare_MOTT_02  | Actinobacteria | 0 | 0 | 0 | 0 | 0  |
| Mycobacterium_intracellulare_MOTT_64  | Actinobacteria | 0 | 0 | 1 | 0 | 0  |
| Mycobacterium_yongonense_05_1390_u    | Actinobacteria | 0 | 0 | 2 | 0 | 0  |
| Mycobacterium_abscessus_uid61613      | Actinobacteria | 0 | 0 | 0 | 0 | 0  |
| Mycobacterium_abscessus_bolletii_5059 | Actinobacteria | 0 | 0 | 3 | 0 | 5  |
| Mycobacterium_massiliense_GO_06_uid1  | Actinobacteria | 0 | 0 | 0 | 0 | 0  |
| Mycobacterium_chubuense_NBB4_uid16    | Actinobacteria | 0 | 0 | 0 | 0 | 0  |
| Mycobacterium_gilvum_PYR_GCK_uid59    | Actinobacteria | 0 | 0 | 3 | 2 | 0  |
| Mycobacterium_gilvum_Spyr1_uid61403   | Actinobacteria | 0 | 0 | 0 | 0 | 0  |
| Mycobacterium_kansasii_ATCC_12478_ui  | Actinobacteria | 0 | 0 | 1 | 0 | 2  |
| Mycobacterium_leprae_Br4923_uid5929   | Actinobacteria | 0 | 0 | 0 | 0 | 0  |
| Mycobacterium_leprae_TN_uid57697      | Actinobacteria | 0 | 0 | 0 | 0 | 0  |
| Mycobacterium_liflandii_128FXT_uid590 | Actinobacteria | 0 | 0 | 0 | 1 | 0  |
| Mycobacterium_marinum_M_uid59423      | Actinobacteria | 0 | 0 | 0 | 1 | 0  |
| Mycobacterium_VKM_Ac_1815D_uid199     | Actinobacteria | 0 | 0 | 0 | 0 | 0  |
| Mycobacterium_rhodesiae_NBB3_uid751   | Actinobacteria | 0 | 0 | 1 | 0 | 0  |
| Mycobacterium_smegmatis_JS623_uid18   | Actinobacteria | 0 | 0 | 3 | 0 | 0  |
| Mycobacterium_smegmatis_MC2_155_ui    | Actinobacteria | 0 | 0 | 0 | 0 | 0  |
| Mycobacterium_smegmatis_MC2_155_ui    | Actinobacteria | 0 | 0 | 0 | 0 | 0  |
| Mycobacterium_JDM601_uid67369         | Actinobacteria | 0 | 0 | 0 | 0 | 0  |
| Mycobacterium_JLS_uid58489            | Actinobacteria | 0 | 0 | 0 | 0 | 0  |
| Mycobacterium_KMS_uid58491            | Actinobacteria | 0 | 0 | 0 | 0 | 0  |
| Mycobacterium_MCS_uid58465            | Actinobacteria | 0 | 0 | 0 | 0 | 0  |
| Mycobacterium_MOTT36Y_uid164001       | Actinobacteria | 0 | 0 | 1 | 0 | 0  |
| Mycobacterium_africanum_GM041182_u    | Actinobacteria | 0 | 0 | 5 | 0 | 12 |
| Mycobacterium_bovis_AF2122_97_uid57   | Actinobacteria | 0 | 0 | 6 | 0 | 12 |
| Mycobacterium_bovis_BCG_Korea_1168f   | Actinobacteria | 0 | 0 | 6 | 0 | 12 |
| Mycobacterium_bovis_BCG_Mexico_uid8   | Actinobacteria | 0 | 0 | 6 | 0 | 12 |
| Mycobacterium_bovis_BCG_Pasteur_117   | Actinobacteria | 0 | 0 | 6 | 0 | 12 |
| Mycobacterium_bovis_BCG_Tokyo_172_u   | Actinobacteria | 0 | 0 | 6 | 0 | 12 |
| Mycobacterium_canettii_CIPT_14001005  | Actinobacteria | 0 | 0 | 8 | 0 | 10 |
| Mycobacterium_canettii_CIPT_14006000  | Actinobacteria | 0 | 0 | 8 | 0 | 10 |
| Mycobacterium_canettii_CIPT_14007000  | Actinobacteria | 0 | 0 | 7 | 0 | 6  |
| Mycobacterium_canettii_CIPT_14007001  | Actinobacteria | 0 | 0 | 6 | 0 | 12 |
| Mycobacterium_canettii_CIPT_14007001  | Actinobacteria | 0 | 0 | 4 | 1 | 0  |
| Mycobacterium_tuberculosis_uid185758  | Actinobacteria | 0 | 0 | 7 | 0 | 12 |
| Mycobacterium_tuberculosis_CAS_NITR2  | Actinobacteria | 0 | 0 | 4 | 0 | 8  |
| Mycobacterium_tuberculosis_CCDC5079   | Actinobacteria | 0 | 0 | 5 | 0 | 12 |
| Mycobacterium_tuberculosis_CCDC5079   | Actinobacteria | 0 | 0 | 6 | 0 | 12 |
| Mycobacterium_tuberculosis_CCDC5180   | Actinobacteria | 0 | 0 | 4 | 0 | 12 |
| Mycobacterium_tuberculosis_CDC1551_u  | Actinobacteria | 0 | 0 | 6 | 0 | 12 |
| Mycobacterium_tuberculosis_CTRI_2_uid | Actinobacteria | 0 | 0 | 6 | 0 | 12 |
| Mycobacterium_tuberculosis_EAI5_uid21 | Actinobacteria | 0 | 0 | 5 | 0 | 12 |
| Mycobacterium_tuberculosis_EAI5_NITR2 | Actinobacteria | 0 | 0 | 6 | 0 | 10 |
| Mycobacterium_tuberculosis_F11_uid584 | Actinobacteria | 0 | 0 | 6 | 0 | 12 |

|                                         |                |   |   |    |   |    |
|-----------------------------------------|----------------|---|---|----|---|----|
| Mycobacterium_tuberculosis_H37Ra_uid!   | Actinobacteria | 0 | 0 | 5  | 0 | 12 |
| Mycobacterium_tuberculosis_H37Rv_uid!   | Actinobacteria | 0 | 0 | 6  | 0 | 12 |
| Mycobacterium_tuberculosis_H37Rv_uid:   | Actinobacteria | 0 | 0 | 6  | 0 | 12 |
| Mycobacterium_tuberculosis_KZN_1435_    | Actinobacteria | 0 | 0 | 6  | 0 | 12 |
| Mycobacterium_tuberculosis_KZN_4207_    | Actinobacteria | 0 | 0 | 6  | 0 | 12 |
| Mycobacterium_tuberculosis_KZN_605_u    | Actinobacteria | 0 | 0 | 6  | 0 | 12 |
| Mycobacterium_tuberculosis_RGTB327_     | Actinobacteria | 0 | 0 | 6  | 0 | 12 |
| Mycobacterium_tuberculosis_RGTB423_     | Actinobacteria | 0 | 0 | 3  | 0 | 10 |
| Mycobacterium_tuberculosis_Beijing_NIT  | Actinobacteria | 0 | 0 | 6  | 0 | 12 |
| Mycobacterium_tuberculosis_Erdman__     | Actinobacteria | 0 | 0 | 7  | 0 | 12 |
| Mycobacterium_tuberculosis_Haarlem_u    | Actinobacteria | 0 | 0 | 7  | 0 | 12 |
| Mycobacterium_tuberculosis_Haarlem3_    | Actinobacteria | 0 | 0 | 6  | 0 | 11 |
| Mycobacterium_tuberculosis_UT205_uid:   | Actinobacteria | 0 | 0 | 6  | 0 | 12 |
| Mycobacterium_ulcerans_Agy99_uid629     | Actinobacteria | 0 | 0 | 0  | 1 | 0  |
| Mycobacterium_vanbaalenii_PYR_1_uid5    | Actinobacteria | 0 | 0 | 2  | 1 | 0  |
| Nocardia_brasiliensis_ATCC_700358_uid&  | Actinobacteria | 0 | 0 | 1  | 0 | 1  |
| Nocardia_cyriacigeorgica_GUH_2_uid893   | Actinobacteria | 0 | 0 | 2  | 0 | 1  |
| Nocardia_farcinica_IFM_10152_uid58203   | Actinobacteria | 0 | 0 | 2  | 0 | 1  |
| Rhodococcus_equi_103S_uid60171          | Actinobacteria | 0 | 0 | 0  | 0 | 1  |
| Rhodococcus_erythropolis_CCM2595_uid    | Actinobacteria | 0 | 0 | 0  | 0 | 1  |
| Rhodococcus_erythropolis_PR4_uid5901    | Actinobacteria | 0 | 0 | 0  | 0 | 2  |
| Rhodococcus_jostii_RHA1_uid58325        | Actinobacteria | 0 | 0 | 18 | 2 | 1  |
| Rhodococcus_opacus_B4_uid13791          | Actinobacteria | 0 | 0 | 11 | 1 | 3  |
| Rhodococcus_pyridinivorans_SB3094_uid   | Actinobacteria | 0 | 0 | 0  | 0 | 1  |
| Segniliparus_rotundus_DSM_44985_uid4!   | Actinobacteria | 0 | 0 | 0  | 0 | 0  |
| Tsukamurella_paurometabola_DSM_201      | Actinobacteria | 0 | 0 | 0  | 0 | 1  |
| Acidothermus_cellulolyticus_11B_uid585! | Actinobacteria | 1 | 0 | 0  | 0 | 2  |
| Frankia_alni_ACN14a_uid58695            | Actinobacteria | 0 | 0 | 3  | 0 | 3  |
| Frankia_Ccl3_uid58397                   | Actinobacteria | 0 | 0 | 11 | 3 | 9  |
| Frankia_EAN1pec_uid58367                | Actinobacteria | 0 | 0 | 30 | 8 | 10 |
| Frankia_Eul1c_uid42615                  | Actinobacteria | 0 | 0 | 0  | 0 | 1  |
| Frankia_symbiont_of_Datisca_glomerata_  | Actinobacteria | 0 | 0 | 1  | 0 | 1  |
| Blastococcus_saxobsidens_DD2_uid8939!   | Actinobacteria | 0 | 0 | 2  | 0 | 0  |
| Geodermatophilus_obscurus_DSM_4316      | Actinobacteria | 0 | 0 | 0  | 0 | 0  |
| Modestobacter_marinus_uid167487         | Actinobacteria | 0 | 0 | 0  | 0 | 0  |
| Nakamurella_multipartita_DSM_44233_u    | Actinobacteria | 0 | 0 | 0  | 0 | 1  |
| Stackebrandtia_nassauensis_DSM_44728    | Actinobacteria | 0 | 0 | 3  | 0 | 2  |
| Kineococcus_radiotolerans_SRS30216_uir  | Actinobacteria | 0 | 0 | 0  | 0 | 0  |
| Beutenbergia_cavernae_DSM_12333_uid     | Actinobacteria | 0 | 0 | 0  | 0 | 0  |
| _Cellvibrio_gilvus_ATCC_13127_uid6814   | Actinobacteria | 0 | 0 | 0  | 0 | 2  |
| Cellulomonas_fimi_ATCC_484_uid66779     | Actinobacteria | 0 | 0 | 0  | 0 | 1  |
| Cellulomonas_flavigena_DSM_20109_uid    | Actinobacteria | 0 | 0 | 0  | 0 | 1  |
| Brachybacterium_faecium_DSM_4810_ui     | Actinobacteria | 0 | 0 | 0  | 0 | 1  |
| Kytococcus_sedentarius_DSM_20547_uid    | Actinobacteria | 0 | 0 | 0  | 0 | 0  |
| Intrasporangium_calvum_DSM_43043_ui     | Actinobacteria | 0 | 0 | 0  | 0 | 2  |
| Jonesia_denitrificans_DSM_20603_uid59   | Actinobacteria | 0 | 0 | 0  | 0 | 1  |
| Clavibacter_michiganensis_NCPPB_382_u   | Actinobacteria | 0 | 0 | 0  | 0 | 0  |
| Clavibacter_michiganensis_nebraskensis_ | Actinobacteria | 0 | 0 | 0  | 0 | 0  |
| Clavibacter_michiganensis_sepedonicus_  | Actinobacteria | 0 | 0 | 0  | 0 | 1  |
| Leifsonia_xyli_cynodontis_DSM_46306_u   | Actinobacteria | 0 | 0 | 0  | 0 | 0  |
| Leifsonia_xyli_CTCB07_uid57759          | Actinobacteria | 0 | 0 | 0  | 0 | 0  |
| Microbacterium_testaceum_StLB037_uid    | Actinobacteria | 0 | 0 | 0  | 0 | 0  |
| Arthrobacter_arilaitensis_Re117_uid5350 | Actinobacteria | 0 | 0 | 0  | 0 | 1  |
| Arthrobacter_aurescens_TC1_uid58109     | Actinobacteria | 0 | 0 | 0  | 0 | 0  |
| Arthrobacter_chlorophenolicus_A6_uid5   | Actinobacteria | 0 | 0 | 0  | 0 | 0  |
| Arthrobacter_phenanthrenivorans_Sphe3   | Actinobacteria | 0 | 0 | 0  | 0 | 0  |

|                                         |                |   |   |    |   |   |
|-----------------------------------------|----------------|---|---|----|---|---|
| Arthrobacter_FB24_uid58141              | Actinobacteria | 0 | 0 | 0  | 0 | 0 |
| Arthrobacter_nitroguajacolicus_Rue61a_1 | Actinobacteria | 0 | 0 | 0  | 0 | 0 |
| Kocuria_rhizophila_DC2201_uid59099      | Actinobacteria | 0 | 0 | 0  | 0 | 0 |
| Micrococcus_luteus_NCTC_2665_uid5903    | Actinobacteria | 0 | 0 | 0  | 0 | 0 |
| Renibacterium_salmoninarum_ATCC_332     | Actinobacteria | 0 | 0 | 0  | 2 | 0 |
| Rothia_dentocariosa_ATCC_17931_uid49    | Actinobacteria | 0 | 0 | 0  | 0 | 0 |
| Rothia_mucilaginoso_uid43093            | Actinobacteria | 0 | 0 | 0  | 0 | 0 |
| Isoptericola_variabilis_225_uid67501    | Actinobacteria | 0 | 0 | 0  | 0 | 1 |
| Xylanimonas_cellulosilytica_DSM_15894   | Actinobacteria | 0 | 0 | 1  | 0 | 2 |
| Sanguibacter_keddiei_DSM_10542_uid40    | Actinobacteria | 0 | 0 | 0  | 0 | 1 |
| Tropheryma_whipplei_Twist_uid57705      | Actinobacteria | 0 | 0 | 0  | 0 | 0 |
| Tropheryma_whipplei_TW08_27_uid5796     | Actinobacteria | 0 | 0 | 0  | 0 | 0 |
| Actinoplanes_friuliensis_DSM_7358_uid2  | Actinobacteria | 0 | 0 | 6  | 2 | 2 |
| Actinoplanes_missouriensis_431_uid1581  | Actinobacteria | 0 | 0 | 1  | 0 | 1 |
| Actinoplanes_N902_109_uid202219         | Actinobacteria | 0 | 0 | 0  | 0 | 2 |
| Actinoplanes_SE50_110_uid162333         | Actinobacteria | 0 | 0 | 0  | 0 | 2 |
| Micromonospora_aurantiaca_ATCC_2702     | Actinobacteria | 0 | 0 | 1  | 0 | 4 |
| Micromonospora_L5_uid45895              | Actinobacteria | 0 | 0 | 1  | 0 | 2 |
| Salinispora_arenicola_CNS_205_uid58659  | Actinobacteria | 0 | 0 | 0  | 0 | 2 |
| Salinispora_tropica_CNB_440_uid58565    | Actinobacteria | 0 | 0 | 0  | 0 | 2 |
| Verrucosispora_maris_AB_18_032_uid66    | Actinobacteria | 0 | 0 | 0  | 0 | 2 |
| Kribbella_flavida_DSM_17836_uid43465    | Actinobacteria | 0 | 0 | 1  | 0 | 1 |
| Nocardioides_JS614_uid58149             | Actinobacteria | 0 | 0 | 1  | 0 | 0 |
| Microlunatus_phosphovorius_NM_1_uid6    | Actinobacteria | 0 | 0 | 0  | 0 | 0 |
| Propionibacterium_acidipropionici_ATCC  | Actinobacteria | 0 | 0 | 0  | 0 | 2 |
| Propionibacterium_acnes_266_uid162056   | Actinobacteria | 0 | 0 | 0  | 0 | 0 |
| Propionibacterium_acnes_6609_uid16213   | Actinobacteria | 0 | 0 | 0  | 0 | 0 |
| Propionibacterium_acnes_ATCC_11828_1    | Actinobacteria | 0 | 0 | 0  | 0 | 0 |
| Propionibacterium_acnes_C1_uid176501    | Actinobacteria | 0 | 0 | 0  | 0 | 0 |
| Propionibacterium_acnes_HL096PA1_uid    | Actinobacteria | 0 | 0 | 0  | 0 | 1 |
| Propionibacterium_acnes_KPA171202_uid   | Actinobacteria | 0 | 0 | 0  | 0 | 0 |
| Propionibacterium_acnes_SK137_uid4807   | Actinobacteria | 0 | 0 | 0  | 0 | 1 |
| Propionibacterium_acnes_TypelA2_P_acr   | Actinobacteria | 0 | 0 | 0  | 0 | 0 |
| Propionibacterium_acnes_TypelA2_P_acr   | Actinobacteria | 0 | 0 | 0  | 0 | 0 |
| Propionibacterium_acnes_TypelA2_P_acr   | Actinobacteria | 0 | 0 | 0  | 0 | 0 |
| Propionibacterium_avidum_44067_uid19    | Actinobacteria | 0 | 0 | 0  | 0 | 0 |
| Propionibacterium_freudenreichii_sherm. | Actinobacteria | 0 | 0 | 0  | 0 | 0 |
| Propionibacterium_propionicum_F0230a    | Actinobacteria | 0 | 0 | 0  | 0 | 0 |
| Actinosynnema_mirum_DSM_43827_uid6      | Actinobacteria | 0 | 0 | 0  | 0 | 1 |
| Amycolatopsis_mediterranei_RB_uid2160   | Actinobacteria | 0 | 0 | 0  | 0 | 1 |
| Amycolatopsis_mediterranei_S699_uid15   | Actinobacteria | 0 | 0 | 0  | 0 | 1 |
| Amycolatopsis_mediterranei_S699_uid17   | Actinobacteria | 0 | 0 | 0  | 0 | 1 |
| Amycolatopsis_mediterranei_U32_uid505   | Actinobacteria | 0 | 0 | 0  | 0 | 1 |
| Amycolatopsis_orientalis_HCCB10007_uid  | Actinobacteria | 0 | 0 | 0  | 0 | 1 |
| Pseudonocardia_dioxanivorans_CB1190_1   | Actinobacteria | 0 | 0 | 0  | 0 | 1 |
| Saccharomonospora_viridis_DSM_43017     | Actinobacteria | 0 | 0 | 0  | 0 | 1 |
| Saccharopolyspora_erythraea_NRRL_2331   | Actinobacteria | 0 | 0 | 13 | 1 | 2 |
| Saccharothrix_espanaensis_DSM_44229     | Actinobacteria | 0 | 0 | 0  | 0 | 1 |
| Thermobispora_bispora_DSM_43833_uid     | Actinobacteria | 0 | 0 | 0  | 0 | 2 |
| Kitasatospora_setae_KM_6054_uid77027    | Actinobacteria | 0 | 0 | 0  | 0 | 2 |
| Streptomyces_albus_J1074_uid196849      | Actinobacteria | 0 | 0 | 2  | 1 | 1 |
| Streptomyces_avermitilis_MA_4680_uid5   | Actinobacteria | 0 | 0 | 5  | 2 | 1 |
| Streptomyces_bingchenggensis_BCW_1_1    | Actinobacteria | 0 | 3 | 13 | 3 | 1 |
| Streptomyces_cattleya_NRRL_8057___DS    | Actinobacteria | 0 | 0 | 0  | 0 | 1 |
| Streptomyces_cattleya_NRRL_8057_uid7    | Actinobacteria | 0 | 0 | 0  | 0 | 1 |
| Streptomyces_coelicolor_A3_2_uid5780    | Actinobacteria | 0 | 0 | 5  | 0 | 1 |

|                                         |                |   |   |    |   |   |
|-----------------------------------------|----------------|---|---|----|---|---|
| Streptomyces_collinus_Tu_365_uid21442   | Actinobacteria | 0 | 0 | 0  | 0 | 1 |
| Streptomyces_davawensis_JCM_4913_uid    | Actinobacteria | 0 | 0 | 12 | 3 | 3 |
| Streptomyces_flavogriseus_ATCC_33331_   | Actinobacteria | 0 | 0 | 1  | 0 | 1 |
| Streptomyces_fulvissimus_DSM_40593_u    | Actinobacteria | 0 | 0 | 0  | 0 | 1 |
| Streptomyces_griseus_NBRC_13350_uid5    | Actinobacteria | 0 | 0 | 1  | 0 | 1 |
| Streptomyces_hygrosopicus_jinggagen:    | Actinobacteria | 0 | 0 | 0  | 0 | 1 |
| Streptomyces_hygrosopicus_jinggagen:    | Actinobacteria | 0 | 0 | 0  | 0 | 1 |
| Streptomyces_rapamycinicus_NRRL_5491    | Actinobacteria | 0 | 0 | 10 | 0 | 1 |
| Streptomyces_scabiei_87_22_uid46531     | Actinobacteria | 0 | 0 | 5  | 0 | 1 |
| Streptomyces_PAMC26508_uid197217        | Actinobacteria | 0 | 0 | 0  | 0 | 1 |
| Streptomyces_SirexAA_E_uid72627         | Actinobacteria | 0 | 0 | 0  | 0 | 1 |
| Streptomyces_venezuelae_ATCC_10712_     | Actinobacteria | 0 | 0 | 0  | 0 | 1 |
| Streptomyces_violaceusniger_Tu_4113_u   | Actinobacteria | 0 | 0 | 19 | 2 | 1 |
| Nocardiopsis_alba_ATCC_BAA_2165_uid1    | Actinobacteria | 0 | 0 | 1  | 0 | 8 |
| Nocardiopsis_dassonvillei_DSM_43111_u   | Actinobacteria | 0 | 1 | 10 | 1 | 2 |
| Thermobifida_fusca_YX_uid57703          | Actinobacteria | 0 | 0 | 3  | 2 | 2 |
| Streptosporangium_roseum_DSM_43021      | Actinobacteria | 0 | 2 | 9  | 3 | 4 |
| Thermomonospora_curvata_DSM_43183       | Actinobacteria | 0 | 0 | 0  | 0 | 2 |
| Bifidobacterium_adolescentis_ATCC_157   | Actinobacteria | 0 | 0 | 0  | 0 | 0 |
| Bifidobacterium_animalis_ATCC_25527_    | Actinobacteria | 0 | 0 | 0  | 0 | 0 |
| Bifidobacterium_animalis_lactis_AD011_  | Actinobacteria | 0 | 0 | 0  | 0 | 0 |
| Bifidobacterium_animalis_lactis_ATCC_27 | Actinobacteria | 0 | 0 | 0  | 0 | 0 |
| Bifidobacterium_animalis_lactis_B420_u  | Actinobacteria | 0 | 0 | 0  | 0 | 0 |
| Bifidobacterium_animalis_lactis_BB_12_  | Actinobacteria | 0 | 0 | 0  | 0 | 0 |
| Bifidobacterium_animalis_lactis_Bi_07_u | Actinobacteria | 0 | 0 | 0  | 0 | 0 |
| Bifidobacterium_animalis_lactis_Bl_04_u | Actinobacteria | 0 | 0 | 0  | 0 | 0 |
| Bifidobacterium_animalis_lactis_Bl12_u  | Actinobacteria | 0 | 0 | 0  | 0 | 0 |
| Bifidobacterium_animalis_lactis_BLC1_u  | Actinobacteria | 0 | 0 | 0  | 0 | 0 |
| Bifidobacterium_animalis_lactis_CNCM_   | Actinobacteria | 0 | 0 | 0  | 0 | 0 |
| Bifidobacterium_animalis_lactis_DSM_10  | Actinobacteria | 0 | 0 | 0  | 0 | 0 |
| Bifidobacterium_animalis_lactis_V9_uid1 | Actinobacteria | 0 | 0 | 0  | 0 | 0 |
| Bifidobacterium_asteroides_PRL2011_u    | Actinobacteria | 0 | 0 | 0  | 0 | 0 |
| Bifidobacterium_bifidum_BGN4_uid1679    | Actinobacteria | 0 | 0 | 0  | 0 | 0 |
| Bifidobacterium_bifidum_PRL2010_uid59   | Actinobacteria | 0 | 0 | 0  | 0 | 0 |
| Bifidobacterium_bifidum_S17_uid59545    | Actinobacteria | 1 | 0 | 0  | 0 | 0 |
| Bifidobacterium_breve_ACS_071_V_Sch8    | Actinobacteria | 0 | 0 | 0  | 0 | 0 |
| Bifidobacterium_breve_UCC2003_uid193    | Actinobacteria | 0 | 0 | 1  | 0 | 0 |
| Bifidobacterium_dentium_Bd1_uid43091    | Actinobacteria | 1 | 0 | 0  | 0 | 0 |
| Bifidobacterium_longum_DJO10A_uid588    | Actinobacteria | 1 | 0 | 1  | 0 | 1 |
| Bifidobacterium_longum_NCC2705_uid57    | Actinobacteria | 0 | 0 | 0  | 0 | 0 |
| Bifidobacterium_longum_infantis_157F_   | Actinobacteria | 0 | 0 | 1  | 0 | 0 |
| Bifidobacterium_longum_infantis_ATCC_   | Actinobacteria | 0 | 0 | 7  | 1 | 2 |
| Bifidobacterium_longum_infantis_ATCC_   | Actinobacteria | 0 | 0 | 7  | 1 | 2 |
| Bifidobacterium_longum_BBMN68_uid60     | Actinobacteria | 0 | 0 | 0  | 0 | 0 |
| Bifidobacterium_longum_F8_uid197184     | Actinobacteria | 0 | 0 | 0  | 0 | 0 |
| Bifidobacterium_longum_JCM_1217_uid6    | Actinobacteria | 0 | 0 | 4  | 0 | 1 |
| Bifidobacterium_longum_JDM301_uid49     | Actinobacteria | 0 | 0 | 2  | 0 | 2 |
| Bifidobacterium_longum_KACC_91563_u     | Actinobacteria | 1 | 0 | 1  | 0 | 0 |
| Bifidobacterium_thermophilum_RBL67_u    | Actinobacteria | 0 | 0 | 0  | 0 | 0 |
| Gardnerella_vaginalis_409_05_uid43211   | Actinobacteria | 0 | 0 | 0  | 0 | 0 |
| Gardnerella_vaginalis_ATCC_14019_uid5   | Actinobacteria | 0 | 0 | 0  | 0 | 0 |
| Gardnerella_vaginalis_HMP9231_uid162    | Actinobacteria | 0 | 0 | 0  | 0 | 0 |
| Adlercreutzia_equolifaciens_DSM_19450   | Actinobacteria | 0 | 0 | 1  | 0 | 0 |
| Atopobium_parvulum_DSM_20469_uid5       | Actinobacteria | 0 | 0 | 0  | 0 | 0 |
| Coriobacterium_glomerans_PW2_uid657     | Actinobacteria | 1 | 0 | 0  | 0 | 0 |
| Cryptobacterium_curtum_DSM_15641_u      | Actinobacteria | 0 | 0 | 0  | 0 | 0 |



|                                        |                           |   |   |    |   |   |
|----------------------------------------|---------------------------|---|---|----|---|---|
| Eggerthella_lenta_DSM_2243_uid59079    | Actinobacteria            | 0 | 0 | 0  | 0 | 1 |
| Eggerthella_YY7918_uid68707            | Actinobacteria            | 1 | 0 | 0  | 0 | 2 |
| Gordonibacter_pamelaeae_7_10_1_b_uic   | Actinobacteria            | 1 | 0 | 0  | 2 | 1 |
| Olsenella_uli_DSM_7084_uid51367        | Actinobacteria            | 1 | 0 | 0  | 0 | 0 |
| Slackia_heliotrinireducens_DSM_20476_u | Actinobacteria            | 0 | 0 | 0  | 3 | 0 |
| Rubrobacter_xyloanophilus_DSM_9941_uic | Actinobacteria            | 0 | 0 | 0  | 0 | 1 |
| Conexibacter_woesei_DSM_14684_uid43    | Actinobacteria            | 0 | 0 | 0  | 0 | 1 |
| Aquifex_aeolicus_VF5_uid57765          | Aquificae                 | 0 | 0 | 3  | 0 | 0 |
| Hydrogenobacter_thermophilus_TK_6_uic  | Aquificae                 | 0 | 0 | 9  | 1 | 1 |
| Hydrogenobacter_thermophilus_TK_6_uic  | Aquificae                 | 0 | 0 | 8  | 1 | 1 |
| Hydrogenobaculum_HO_uid190882          | Aquificae                 | 0 | 0 | 4  | 0 | 0 |
| Hydrogenobaculum_SN_uid46251           | Aquificae                 | 0 | 0 | 3  | 0 | 0 |
| Hydrogenobaculum_Y04AAS1_uid58857      | Aquificae                 | 0 | 0 | 4  | 0 | 0 |
| Thermocrinis_albus_DSM_14484_uid46251  | Aquificae                 | 0 | 0 | 5  | 1 | 0 |
| Desulfurobacterium_thermolithotrophum  | Aquificae                 | 0 | 0 | 19 | 1 | 5 |
| Thermovibrio_ammonificans_HB_1_uid62   | Aquificae                 | 0 | 0 | 1  | 0 | 0 |
| Persephonella_marina_EX_H1_uid58119    | Aquificae                 | 0 | 0 | 0  | 0 | 0 |
| Sulfurihydrogenibium_azorense_Az_Fu1_u | Aquificae                 | 0 | 0 | 12 | 0 | 0 |
| Sulfurihydrogenibium_YO3AOP1_uid5885   | Aquificae                 | 0 | 0 | 9  | 1 | 1 |
| Chthonomonas_calidirosea_T49_uid2086   | Armatimonadetes           | 0 | 0 | 3  | 0 | 1 |
| Rhodothermus_marinus_DSM_4252_uid4     | Bacteroidetes/Chloroflexi | 0 | 0 | 3  | 1 | 0 |
| Rhodothermus_marinus_SG0_5JP17_172     | Bacteroidetes/Chloroflexi | 0 | 0 | 11 | 1 | 2 |
| Salinibacter_ruber_DSM_13855_uid5851   | Bacteroidetes/Chloroflexi | 0 | 0 | 7  | 2 | 0 |
| Salinibacter_ruber_M8_uid47323         | Bacteroidetes/Chloroflexi | 0 | 0 | 9  | 2 | 0 |
| Bacteroides_fragilis_638R_uid84217     | Bacteroidetes/Chloroflexi | 1 | 0 | 0  | 0 | 0 |
| Bacteroides_fragilis_NCTC_9343_uid5763 | Bacteroidetes/Chloroflexi | 1 | 0 | 0  | 0 | 0 |
| Bacteroides_fragilis_YCH46_uid58195    | Bacteroidetes/Chloroflexi | 0 | 0 | 0  | 0 | 1 |
| Bacteroides_helcogenes_P_36_108_uid62  | Bacteroidetes/Chloroflexi | 0 | 0 | 0  | 0 | 0 |
| Bacteroides_salanitronis_DSM_18170_uic | Bacteroidetes/Chloroflexi | 0 | 0 | 0  | 1 | 0 |
| Bacteroides_thetaiotaomicron_VPI_5482  | Bacteroidetes/Chloroflexi | 0 | 0 | 0  | 0 | 0 |
| Bacteroides_vulgatus_ATCC_8482_uid582  | Bacteroidetes/Chloroflexi | 0 | 0 | 0  | 0 | 1 |
| Bacteroides_xyloxydans_XB1A_uid1971    | Bacteroidetes/Chloroflexi | 0 | 0 | 0  | 2 | 0 |
| Odoribacter_splanchnicus_DSM_20712_u   | Bacteroidetes/Chloroflexi | 0 | 0 | 1  | 1 | 1 |
| Paludibacter_propionicigenes_WB4_uid61 | Bacteroidetes/Chloroflexi | 0 | 0 | 0  | 5 | 0 |
| Parabacteroides_distasonis_ATCC_8503_u | Bacteroidetes/Chloroflexi | 0 | 0 | 0  | 0 | 0 |
| Porphyromonas_asaccharolytica_DSM_21   | Bacteroidetes/Chloroflexi | 0 | 0 | 0  | 2 | 0 |
| Porphyromonas_gingivalis_ATCC_33277_u  | Bacteroidetes/Chloroflexi | 0 | 0 | 0  | 0 | 0 |
| Porphyromonas_gingivalis_TDC60_uid674  | Bacteroidetes/Chloroflexi | 0 | 0 | 0  | 0 | 0 |
| Porphyromonas_gingivalis_W83_uid5764   | Bacteroidetes/Chloroflexi | 0 | 0 | 0  | 0 | 1 |
| Tannerella_forsythia_ATCC_43037_uid83  | Bacteroidetes/Chloroflexi | 0 | 0 | 0  | 1 | 0 |
| Prevotella_dentalis_DSM_3688_uid18481  | Bacteroidetes/Chloroflexi | 0 | 0 | 0  | 0 | 0 |
| Prevotella_denticola_F0289_uid65091    | Bacteroidetes/Chloroflexi | 0 | 0 | 0  | 0 | 0 |
| Prevotella_intermedia_17_uid163151     | Bacteroidetes/Chloroflexi | 1 | 0 | 0  | 0 | 0 |
| Prevotella_melaninogenica_ATCC_25845_u | Bacteroidetes/Chloroflexi | 0 | 0 | 0  | 1 | 0 |
| Prevotella_ruminicola_23_uid47507      | Bacteroidetes/Chloroflexi | 1 | 0 | 0  | 3 | 0 |
| Prevotella_oral_taxon_299_F0039_uid45  | Bacteroidetes/Chloroflexi | 0 | 0 | 0  | 0 | 0 |
| Alistipes_finegoldii_DSM_17242_uid1681 | Bacteroidetes/Chloroflexi | 0 | 0 | 0  | 0 | 1 |
| Alistipes_shahii_WAL_8301_uid197175    | Bacteroidetes/Chloroflexi | 0 | 0 | 0  | 0 | 0 |
| Candidatus_Azobacteroides_pseudotricho | Bacteroidetes/Chloroflexi | 0 | 0 | 0  | 0 | 0 |
| Bacteroides_CF50_uid222805             | Bacteroidetes/Chloroflexi | 1 | 0 | 0  | 1 | 0 |
| Belliella_baltica_DSM_15883_uid168182  | Bacteroidetes/Chloroflexi | 1 | 0 | 0  | 2 | 0 |
| Cyclobacterium_marinum_DSM_745_uid:    | Bacteroidetes/Chloroflexi | 0 | 0 | 0  | 3 | 0 |
| Echinicola_vietnamensis_DSM_17526_uic  | Bacteroidetes/Chloroflexi | 0 | 0 | 0  | 4 | 0 |
| Cytophaga_hutchinsonii_ATCC_33406_uic  | Bacteroidetes/Chloroflexi | 0 | 0 | 0  | 5 | 0 |
| Dyadobacter_fermentans_DSM_18053_u     | Bacteroidetes/Chloroflexi | 0 | 0 | 0  | 1 | 0 |
| Emticicia_oligotrophica_DSM_17448_uid: | Bacteroidetes/Chloroflexi | 0 | 0 | 0  | 5 | 0 |

|                                                 |                      |   |   |   |   |   |
|-------------------------------------------------|----------------------|---|---|---|---|---|
| <i>Fibrella aestuarina</i> _uid178352           | Bacteroidetes/Chloro | 0 | 0 | 2 | 0 | 0 |
| <i>Flexibacter litoralis</i> _DSM_6794_uid1682  | Bacteroidetes/Chloro | 0 | 0 | 1 | 6 | 0 |
| <i>Leadbetterella byssophila</i> _DSM_17132_    | Bacteroidetes/Chloro | 0 | 0 | 1 | 2 | 0 |
| <i>Runella slithyformis</i> _DSM_19594_uid683   | Bacteroidetes/Chloro | 0 | 0 | 0 | 6 | 0 |
| <i>Spirosoma linguale</i> _DSM_74_uid43413      | Bacteroidetes/Chloro | 0 | 0 | 0 | 7 | 0 |
| <i>Marivirga tractuosa</i> _DSM_4126_uid6083    | Bacteroidetes/Chloro | 0 | 0 | 0 | 1 | 0 |
| <i>Blattabacterium__Cryptocercus punctula</i>   | Bacteroidetes/Chloro | 0 | 0 | 0 | 0 | 0 |
| <i>Blattabacterium__Blaberus giganteus__u</i>   | Bacteroidetes/Chloro | 0 | 0 | 0 | 0 | 0 |
| <i>Blattabacterium__Blatta orientalis__Tar</i>  | Bacteroidetes/Chloro | 0 | 0 | 0 | 0 | 0 |
| <i>Blattabacterium__Blattella germanica__f</i>  | Bacteroidetes/Chloro | 0 | 0 | 0 | 0 | 0 |
| <i>Blattabacterium__Mastotermes darwinie</i>    | Bacteroidetes/Chloro | 0 | 0 | 0 | 0 | 0 |
| <i>Blattabacterium__Nauphoeta cinerea__u</i>    | Bacteroidetes/Chloro | 0 | 0 | 0 | 0 | 0 |
| <i>Blattabacterium__Panesthia angustipenn</i>   | Bacteroidetes/Chloro | 0 | 0 | 0 | 0 | 0 |
| <i>Blattabacterium__Periplaneta americana</i>   | Bacteroidetes/Chloro | 0 | 0 | 0 | 0 | 0 |
| <i>Fluviicola taffensis</i> _DSM_16823_uid6527  | Bacteroidetes/Chloro | 1 | 0 | 0 | 4 | 0 |
| <i>Owenweeksia hongkongensis</i> _DSM_1736      | Bacteroidetes/Chloro | 0 | 0 | 0 | 3 | 0 |
| <i>Aequorivita sublithincola</i> _DSM_14238_u   | Bacteroidetes/Chloro | 0 | 0 | 0 | 1 | 0 |
| <i>Capnocytophaga canimorsus</i> _Cc5_uid707    | Bacteroidetes/Chloro | 1 | 0 | 0 | 0 | 0 |
| <i>Capnocytophaga ochracea</i> _DSM_7271_u      | Bacteroidetes/Chloro | 0 | 0 | 0 | 0 | 0 |
| <i>Cellulophaga algicola</i> _DSM_14237_uid62   | Bacteroidetes/Chloro | 0 | 0 | 0 | 5 | 0 |
| <i>Cellulophaga lytica</i> _DSM_7489_uid63401   | Bacteroidetes/Chloro | 0 | 0 | 0 | 0 | 0 |
| <i>Croceibacter atlanticus</i> _HTCC2559_uid49  | Bacteroidetes/Chloro | 0 | 0 | 0 | 0 | 0 |
| <i>Flavobacterium branchiophilum</i> _FL_15_u   | Bacteroidetes/Chloro | 1 | 0 | 1 | 4 | 0 |
| <i>Flavobacterium columnare</i> _ATCC_49512     | Bacteroidetes/Chloro | 1 | 0 | 0 | 1 | 0 |
| <i>Flavobacterium indicum</i> _GPTSA100_9_uid   | Bacteroidetes/Chloro | 0 | 0 | 0 | 1 | 0 |
| <i>Flavobacterium johnsoniae</i> _UW101_uid5    | Bacteroidetes/Chloro | 0 | 0 | 0 | 6 | 0 |
| <i>Flavobacterium psychrophilum</i> _JIP02_86   | Bacteroidetes/Chloro | 1 | 0 | 0 | 0 | 0 |
| <i>Gramella forsetii</i> _KT0803_uid58881       | Bacteroidetes/Chloro | 0 | 0 | 0 | 1 | 0 |
| <i>Krokinobacter 4H_3_7_5</i> _uid66593         | Bacteroidetes/Chloro | 0 | 0 | 0 | 0 | 0 |
| <i>Lacinutrix 5H_3_7_4</i> _uid68067            | Bacteroidetes/Chloro | 0 | 0 | 0 | 0 | 0 |
| <i>Flavobacteriales bacterium</i> _HTCC2170_u   | Bacteroidetes/Chloro | 0 | 0 | 0 | 0 | 0 |
| <i>Muricauda ruestringensis</i> _DSM_13258_u    | Bacteroidetes/Chloro | 0 | 0 | 1 | 0 | 0 |
| <i>Persicivirga dokdonensis</i> _DSW_6_uid186   | Bacteroidetes/Chloro | 0 | 0 | 0 | 2 | 0 |
| <i>Ornithobacterium rhinotracheale</i> _DSM_    | Bacteroidetes/Chloro | 1 | 0 | 0 | 0 | 0 |
| <i>Polaribacter</i> _MED152_uid54207            | Bacteroidetes/Chloro | 0 | 0 | 0 | 0 | 0 |
| <i>Psychroflexus torquis</i> _ATCC_700755_uid   | Bacteroidetes/Chloro | 1 | 0 | 0 | 8 | 0 |
| <i>Riemerella anatipestifer</i> _ATCC_11845__   | Bacteroidetes/Chloro | 1 | 0 | 0 | 0 | 0 |
| <i>Riemerella anatipestifer</i> _ATCC_11845__   | Bacteroidetes/Chloro | 0 | 0 | 0 | 0 | 0 |
| <i>Riemerella anatipestifer</i> _RA_CH_1_uid17  | Bacteroidetes/Chloro | 1 | 0 | 0 | 0 | 0 |
| <i>Riemerella anatipestifer</i> _RA_CH_2_uid18  | Bacteroidetes/Chloro | 1 | 0 | 0 | 0 | 0 |
| <i>Riemerella anatipestifer</i> _RA_GD_uid162(  | Bacteroidetes/Chloro | 1 | 0 | 0 | 0 | 0 |
| <i>Robiginitalea biformata</i> _HTCC2501_uid5   | Bacteroidetes/Chloro | 0 | 0 | 0 | 0 | 0 |
| <i>Flavobacteriaceae bacterium</i> _3519_10_u   | Bacteroidetes/Chloro | 0 | 0 | 0 | 1 | 0 |
| <i>Weeksella virosa</i> _DSM_16922_uid63627     | Bacteroidetes/Chloro | 1 | 0 | 0 | 0 | 0 |
| <i>Zobellia galactanivorans</i> _uid70621       | Bacteroidetes/Chloro | 0 | 0 | 0 | 2 | 0 |
| <i>Zunongwangia profunda</i> _SM_A87_uid48      | Bacteroidetes/Chloro | 1 | 0 | 2 | 0 | 0 |
| <i>Candidatus Sulcia muelleri</i> _CARI_uid525  | Bacteroidetes/Chloro | 0 | 0 | 0 | 0 | 0 |
| <i>Candidatus Sulcia muelleri</i> _DMIN_uid47   | Bacteroidetes/Chloro | 0 | 0 | 0 | 0 | 0 |
| <i>Candidatus Sulcia muelleri</i> _GWSS_uid58   | Bacteroidetes/Chloro | 0 | 0 | 0 | 0 | 0 |
| <i>Candidatus Sulcia muelleri</i> _SMDSEM_uic   | Bacteroidetes/Chloro | 0 | 0 | 0 | 0 | 0 |
| <i>Candidatus Sulcia muelleri</i> _Sulcia_ALF_u | Bacteroidetes/Chloro | 0 | 0 | 0 | 0 | 0 |
| <i>Candidatus Uzinura diaspidicola</i> _ASNER_  | Bacteroidetes/Chloro | 0 | 0 | 0 | 0 | 0 |
| <i>Chitinophaga pinensis</i> _DSM_2588_uid59    | Bacteroidetes/Chloro | 0 | 0 | 0 | 0 | 0 |
| <i>Niastella koreensis</i> _GR20_10_uid83125    | Bacteroidetes/Chloro | 0 | 0 | 0 | 1 | 1 |
| <i>Haliscomenobacter hydrossis</i> _DSM_110C    | Bacteroidetes/Chloro | 0 | 0 | 0 | 6 | 0 |
| <i>Saprospira grandis</i> _Lewin_uid89375       | Bacteroidetes/Chloro | 0 | 0 | 0 | 1 | 0 |







|                                        |               |   |   |     |    |    |
|----------------------------------------|---------------|---|---|-----|----|----|
| Cyanobacterium_stanieri_PCC_7202_uid1  | Cyanobacteria | 0 | 0 | 31  | 4  | 0  |
| Cyanobium_gracile_PCC_6307_uid182931   | Cyanobacteria | 0 | 0 | 0   | 0  | 0  |
| Cyanothece_ATCC_51142_uid59013         | Cyanobacteria | 0 | 1 | 8   | 5  | 2  |
| Cyanothece_PCC_7424_uid59025           | Cyanobacteria | 0 | 1 | 52  | 13 | 6  |
| Cyanothece_PCC_7425_uid59435           | Cyanobacteria | 0 | 0 | 5   | 0  | 0  |
| Cyanothece_PCC_7822_uid52547           | Cyanobacteria | 0 | 7 | 32  | 5  | 1  |
| Cyanothece_PCC_8801_uid59027           | Cyanobacteria | 0 | 0 | 33  | 12 | 2  |
| Cyanothece_PCC_8802_uid59143           | Cyanobacteria | 0 | 0 | 25  | 8  | 5  |
| Dactylococcopsis_salina_PCC_8305_uid18 | Cyanobacteria | 0 | 6 | 23  | 1  | 5  |
| Gloeocapsa_PCC_7428_uid183112          | Cyanobacteria | 0 | 0 | 4   | 3  | 0  |
| Halotheca_PCC_7418_uid183338           | Cyanobacteria | 0 | 4 | 42  | 7  | 9  |
| Microcystis_aeruginosa_NIES_843_uid59  | Cyanobacteria | 0 | 3 | 107 | 14 | 11 |
| Synechococcus_elongatus_PCC_6301_uid   | Cyanobacteria | 0 | 0 | 1   | 0  | 0  |
| Synechococcus_elongatus_PCC_7942_uid   | Cyanobacteria | 0 | 0 | 1   | 0  | 0  |
| Synechococcus_CC9311_uid58123          | Cyanobacteria | 0 | 0 | 0   | 0  | 0  |
| Synechococcus_CC9605_uid58319          | Cyanobacteria | 0 | 0 | 0   | 0  | 0  |
| Synechococcus_CC9902_uid58323          | Cyanobacteria | 0 | 0 | 0   | 0  | 0  |
| Synechococcus_JA_2_3B_a_2_13_uid58     | Cyanobacteria | 0 | 0 | 72  | 1  | 2  |
| Synechococcus_JA_3_3Ab_uid58535        | Cyanobacteria | 0 | 0 | 48  | 16 | 20 |
| Synechococcus_PCC_6312_uid182934       | Cyanobacteria | 0 | 1 | 1   | 3  | 0  |
| Synechococcus_PCC_7002_uid59137        | Cyanobacteria | 0 | 0 | 2   | 0  | 0  |
| Synechococcus_PCC_7502_uid183008       | Cyanobacteria | 0 | 0 | 0   | 1  | 0  |
| Synechococcus_RCC307_uid61609          | Cyanobacteria | 0 | 0 | 0   | 0  | 0  |
| Synechococcus_WH_7803_uid61607         | Cyanobacteria | 0 | 0 | 0   | 0  | 0  |
| Synechococcus_WH_8102_uid61581         | Cyanobacteria | 0 | 0 | 0   | 0  | 0  |
| Synechocystis_PCC_6803_uid159873       | Cyanobacteria | 0 | 0 | 1   | 0  | 0  |
| Synechocystis_PCC_6803_uid189748       | Cyanobacteria | 0 | 0 | 1   | 0  | 0  |
| Synechocystis_PCC_6803_uid57659        | Cyanobacteria | 0 | 0 | 1   | 0  | 0  |
| Synechocystis_PCC_6803_substr_GT_I     | Cyanobacteria | 0 | 0 | 1   | 0  | 0  |
| Synechocystis_PCC_6803_substr_GT_I     | Cyanobacteria | 0 | 0 | 1   | 0  | 0  |
| Synechocystis_PCC_6803_substr_PCC_N    | Cyanobacteria | 0 | 0 | 1   | 0  | 0  |
| Thermosynechococcus_elongatus_BP_1     | Cyanobacteria | 0 | 0 | 35  | 12 | 0  |
| Thermosynechococcus_NK55_uid231517     | Cyanobacteria | 0 | 0 | 0   | 0  | 0  |
| Arthrospira_platensis_NIES_39_uid19717 | Cyanobacteria | 0 | 9 | 52  | 10 | 6  |
| Crinalium_epipsammum_PCC_9333_uid1     | Cyanobacteria | 0 | 3 | 40  | 9  | 8  |
| Geitlerinema_PCC_7407_uid183007        | Cyanobacteria | 0 | 0 | 21  | 5  | 0  |
| Leptolyngbya_PCC_7376_uid182928        | Cyanobacteria | 0 | 0 | 0   | 2  | 0  |
| Microcoleus_PCC_7113_uid183114         | Cyanobacteria | 0 | 3 | 13  | 2  | 0  |
| Oscillatoria_acuminata_PCC_6304_uid18  | Cyanobacteria | 0 | 4 | 18  | 2  | 2  |
| Oscillatoria_PCC_7112_uid183110        | Cyanobacteria | 0 | 4 | 76  | 14 | 8  |
| Pseudanabaena_PCC_7367_uid183004       | Cyanobacteria | 0 | 0 | 0   | 2  | 0  |
| Trichodesmium_erythraeum_IMS101_uid    | Cyanobacteria | 0 | 0 | 11  | 5  | 3  |
| Chroococciopsis_thermalis_PCC_7203     | Cyanobacteria | 0 | 2 | 7   | 4  | 0  |
| Pleurocapsa_PCC_7327_uid183006         | Cyanobacteria | 0 | 0 | 13  | 8  | 1  |
| Stanieria_cyanosphaera_PCC_7437_uid18  | Cyanobacteria | 0 | 1 | 37  | 13 | 3  |
| Prochlorococcus_marinus_AS9601_uid58   | Cyanobacteria | 0 | 0 | 0   | 0  | 0  |
| Prochlorococcus_marinus_MIT_9211_uid   | Cyanobacteria | 0 | 0 | 0   | 0  | 0  |
| Prochlorococcus_marinus_MIT_9215_uid   | Cyanobacteria | 0 | 0 | 0   | 0  | 0  |
| Prochlorococcus_marinus_MIT_9301_uid   | Cyanobacteria | 0 | 0 | 0   | 0  | 0  |
| Prochlorococcus_marinus_MIT_9303_uid   | Cyanobacteria | 0 | 0 | 0   | 6  | 0  |
| Prochlorococcus_marinus_MIT_9312_uid   | Cyanobacteria | 0 | 0 | 0   | 0  | 0  |
| Prochlorococcus_marinus_MIT_9313_uid   | Cyanobacteria | 0 | 0 | 0   | 5  | 0  |
| Prochlorococcus_marinus_MIT_9515_uid   | Cyanobacteria | 0 | 0 | 0   | 0  | 0  |
| Prochlorococcus_marinus_NATL1A_uid58   | Cyanobacteria | 0 | 0 | 0   | 0  | 0  |
| Prochlorococcus_marinus_NATL2A_uid58   | Cyanobacteria | 0 | 0 | 0   | 0  | 0  |
| Prochlorococcus_marinus_CCMP1375_uid   | Cyanobacteria | 0 | 0 | 0   | 0  | 0  |



|                                                  |         |   |   |    |    |   |
|--------------------------------------------------|---------|---|---|----|----|---|
| Bacillus_cereus_B4264_uid58757                   | Bacilli | 0 | 0 | 4  | 1  | 0 |
| Bacillus_cereus_biovar_anthraxis_CI_uid5         | Bacilli | 0 | 0 | 9  | 0  | 0 |
| Bacillus_cereus_E33L_uid58103                    | Bacilli | 0 | 0 | 17 | 0  | 0 |
| Bacillus_cereus_F837_76_uid83611                 | Bacilli | 0 | 0 | 9  | 0  | 1 |
| Bacillus_cereus_FRI_35_uid173403                 | Bacilli | 0 | 0 | 13 | 2  | 0 |
| Bacillus_cereus_G9842_uid58759                   | Bacilli | 0 | 0 | 7  | 1  | 0 |
| Bacillus_cereus_NC7401_uid82815                  | Bacilli | 0 | 0 | 8  | 0  | 0 |
| Bacillus_cereus_Q1_uid58529                      | Bacilli | 0 | 0 | 11 | 2  | 1 |
| Bacillus_cytotoxicus_NVH_391_98_uid58            | Bacilli | 0 | 0 | 4  | 0  | 0 |
| Bacillus_thuringiensis_Bt407_uid177931           | Bacilli | 0 | 0 | 5  | 0  | 0 |
| Bacillus_thuringiensis_HD_771_uid17337           | Bacilli | 0 | 0 | 10 | 0  | 0 |
| Bacillus_thuringiensis_HD_789_uid17386           | Bacilli | 0 | 0 | 4  | 0  | 2 |
| Bacillus_thuringiensis_MC28_uid176369            | Bacilli | 0 | 0 | 7  | 0  | 0 |
| Bacillus_thuringiensis_serovar_chinensis_Bacilli |         | 0 | 0 | 11 | 3  | 1 |
| Bacillus_thuringiensis_serovar_finitimus_Bacilli |         | 0 | 0 | 14 | 2  | 1 |
| Bacillus_thuringiensis_serovar_konkukian_Bacilli |         | 0 | 0 | 11 | 0  | 0 |
| Bacillus_thuringiensis_BMB171_uid49135           | Bacilli | 0 | 0 | 9  | 1  | 0 |
| Bacillus_thuringiensis_serovar_kurstaki_Bacilli  |         | 0 | 0 | 5  | 0  | 1 |
| Bacillus_thuringiensis_serovar_IS5056_uid        | Bacilli | 0 | 0 | 17 | 6  | 1 |
| Bacillus_thuringiensis_AI_Hakam_uid587           | Bacilli | 0 | 0 | 7  | 0  | 1 |
| Bacillus_thuringiensis_YBT_1518_uid2294          | Bacilli | 0 | 0 | 9  | 11 | 1 |
| Bacillus_toyonensis_BCT_7112_uid22721            | Bacilli | 0 | 0 | 2  | 0  | 0 |
| Bacillus_weihenstephanensis_KBAB4_uid            | Bacilli | 0 | 0 | 5  | 0  | 0 |
| Bacillus_clausii_KSM_K16_uid58237                | Bacilli | 0 | 0 | 2  | 4  | 0 |
| Bacillus_coagulans_2_6_uid68053                  | Bacilli | 0 | 0 | 11 | 0  | 0 |
| Bacillus_coagulans_36D1_uid54335                 | Bacilli | 0 | 0 | 8  | 0  | 0 |
| Bacillus_halodurans_C_125_uid57791               | Bacilli | 0 | 0 | 0  | 8  | 0 |
| Bacillus_infantis_NRRL_B_14911_uid2228           | Bacilli | 0 | 0 | 0  | 2  | 0 |
| Bacillus_megaterium_DSM319_uid48371              | Bacilli | 0 | 0 | 0  | 0  | 0 |
| Bacillus_megaterium_QM_B1551_uid158              | Bacilli | 0 | 0 | 1  | 0  | 0 |
| Bacillus_megaterium_WSH_002_uid1598              | Bacilli | 0 | 0 | 1  | 1  | 0 |
| Bacillus_pseudofirmus_OF4_uid45847               | Bacilli | 0 | 0 | 3  | 4  | 0 |
| Bacillus_pumilus_SAFR_032_uid59017               | Bacilli | 0 | 0 | 0  | 0  | 0 |
| Bacillus_selenitireducens_MLS10_uid495           | Bacilli | 0 | 3 | 12 | 1  | 0 |
| Bacillus_1NLA3E_uid81841                         | Bacilli | 0 | 0 | 15 | 2  | 0 |
| Bacillus_JS_uid162189                            | Bacilli | 0 | 0 | 0  | 0  | 0 |
| Bacillus_amyloliquefaciens_CC178_uid22           | Bacilli | 0 | 0 | 0  | 0  | 0 |
| Bacillus_amyloliquefaciens_IT_45_uid181          | Bacilli | 0 | 0 | 0  | 0  | 0 |
| Bacillus_amyloliquefaciens_LFB112_uid2           | Bacilli | 0 | 0 | 0  | 0  | 0 |
| Bacillus_amyloliquefaciens_LL3_uid15813          | Bacilli | 0 | 0 | 0  | 0  | 0 |
| Bacillus_amyloliquefaciens_DSM_7_uid5            | Bacilli | 0 | 0 | 0  | 0  | 0 |
| Bacillus_amyloliquefaciens_FZB42_uid58           | Bacilli | 0 | 0 | 0  | 0  | 0 |
| Bacillus_amyloliquefaciens_plantarum_A           | Bacilli | 0 | 0 | 0  | 0  | 0 |
| Bacillus_amyloliquefaciens_plantarum_C           | Bacilli | 0 | 0 | 0  | 0  | 0 |
| Bacillus_amyloliquefaciens_plantarum_N           | Bacilli | 0 | 0 | 0  | 0  | 0 |
| Bacillus_amyloliquefaciens_plantarum_U           | Bacilli | 0 | 0 | 0  | 0  | 0 |
| Bacillus_amyloliquefaciens_plantarum_U           | Bacilli | 0 | 0 | 0  | 0  | 0 |
| Bacillus_amyloliquefaciens_plantarum_U           | Bacilli | 0 | 0 | 0  | 0  | 0 |
| Bacillus_amyloliquefaciens_plantarum_Y           | Bacilli | 0 | 0 | 0  | 0  | 0 |
| Bacillus_amyloliquefaciens_TA208_uid15           | Bacilli | 0 | 0 | 0  | 0  | 0 |
| Bacillus_amyloliquefaciens_XH7_uid1588           | Bacilli | 0 | 0 | 0  | 0  | 0 |
| Bacillus_amyloliquefaciens_Y2_uid16519           | Bacilli | 0 | 0 | 0  | 0  | 0 |
| Bacillus_atrophaeus_1942_uid59887                | Bacilli | 0 | 0 | 0  | 0  | 0 |
| Bacillus_licheniformis_9945A_uid207072           | Bacilli | 0 | 0 | 0  | 0  | 0 |
| Bacillus_licheniformis_ATCC_14580_uid5           | Bacilli | 0 | 0 | 0  | 0  | 0 |
| Bacillus_licheniformis_DSM_13___ATCC_            | Bacilli | 0 | 0 | 0  | 0  | 0 |



|                                           |         |   |   |    |   |   |
|-------------------------------------------|---------|---|---|----|---|---|
| Bacillus_subtilis_BSn5_uid62463           | Bacilli | 0 | 0 | 0  | 0 | 0 |
| Bacillus_subtilis_PY79_uid229877          | Bacilli | 0 | 0 | 0  | 0 | 0 |
| Bacillus_subtilis_QB928_uid173926         | Bacilli | 0 | 0 | 0  | 0 | 0 |
| Bacillus_subtilis_natto_BEST195_uid1830   | Bacilli | 0 | 0 | 0  | 0 | 0 |
| Bacillus_subtilis_spizizenii_W23_uid5187  | Bacilli | 0 | 0 | 0  | 0 | 0 |
| Bacillus_subtilis_spizizenii_TU_B_10_uid7 | Bacilli | 0 | 0 | 0  | 0 | 0 |
| Bacillus_subtilis_168_uid57675            | Bacilli | 0 | 0 | 0  | 0 | 0 |
| Bacillus_subtilis_BAB_1_uid195461         | Bacilli | 0 | 0 | 0  | 0 | 0 |
| Bacillus_subtilis_BSP1_uid184010          | Bacilli | 0 | 0 | 0  | 0 | 0 |
| Bacillus_subtilis_6051_HGW_uid193706      | Bacilli | 0 | 0 | 0  | 0 | 0 |
| Bacillus_subtilis_RO_NN_1_uid158879       | Bacilli | 0 | 0 | 0  | 0 | 0 |
| Bacillus_subtilis_XF_1_uid189187          | Bacilli | 0 | 0 | 0  | 0 | 0 |
| Geobacillus_kaustophilus_HTA426_uid58     | Bacilli | 0 | 0 | 13 | 3 | 0 |
| Geobacillus_C56_T3_uid49467               | Bacilli | 0 | 0 | 5  | 1 | 0 |
| Geobacillus_HH01_uid188479                | Bacilli | 0 | 0 | 9  | 2 | 0 |
| Geobacillus_JF8_uid215234                 | Bacilli | 1 | 0 | 7  | 5 | 0 |
| Geobacillus_WCH70_uid59045                | Bacilli | 0 | 0 | 67 | 8 | 0 |
| Geobacillus_Y4_1MC1_uid55779              | Bacilli | 0 | 0 | 1  | 0 | 0 |
| Geobacillus_Y412MC52_uid55381             | Bacilli | 0 | 0 | 13 | 0 | 0 |
| Geobacillus_Y412MC61_uid41171             | Bacilli | 0 | 0 | 12 | 0 | 0 |
| Geobacillus_thermodenitrificans_NG80_2    | Bacilli | 0 | 0 | 1  | 1 | 0 |
| Geobacillus_thermoglucosidasius_C56_YS    | Bacilli | 0 | 0 | 1  | 0 | 0 |
| Geobacillus_thermoleovorans_CCB_US3_      | Bacilli | 0 | 1 | 20 | 3 | 0 |
| Halobacillus_halophilus_DSM_2266_uid1     | Bacilli | 0 | 0 | 16 | 2 | 0 |
| Lysinibacillus_sphaericus_C3_41_uid5894   | Bacilli | 0 | 0 | 1  | 0 | 1 |
| Oceanobacillus_ihayensis_HTE831_uid57     | Bacilli | 0 | 0 | 0  | 2 | 0 |
| Exiguobacterium_antarcticum_B7_uid17      | Bacilli | 0 | 1 | 4  | 1 | 0 |
| Exiguobacterium_sibiricum_255_15_uid5     | Bacilli | 0 | 1 | 14 | 3 | 0 |
| Exiguobacterium_AT1b_uid59093             | Bacilli | 0 | 0 | 3  | 0 | 0 |
| Exiguobacterium_MH3_uid227425             | Bacilli | 0 | 0 | 0  | 0 | 0 |
| Listeria_innocua_Clip11262_uid61567       | Bacilli | 1 | 0 | 0  | 0 | 0 |
| Listeria_ivanovii_PAM_55_uid73473         | Bacilli | 0 | 0 | 0  | 0 | 0 |
| Listeria_monocytogenes_La111_uid1937      | Bacilli | 0 | 0 | 0  | 0 | 0 |
| Listeria_monocytogenes_07PF0776_uid1      | Bacilli | 0 | 0 | 0  | 0 | 0 |
| Listeria_monocytogenes_uid43671           | Bacilli | 0 | 0 | 0  | 0 | 0 |
| Listeria_monocytogenes_08_5923_uid43      | Bacilli | 0 | 0 | 0  | 0 | 0 |
| Listeria_monocytogenes_10403S_uid544      | Bacilli | 1 | 0 | 0  | 0 | 0 |
| Listeria_monocytogenes_ATCC_19117_u       | Bacilli | 0 | 0 | 0  | 0 | 0 |
| Listeria_monocytogenes_EGD_uid223288      | Bacilli | 1 | 0 | 0  | 0 | 0 |
| Listeria_monocytogenes_EGD_e_uid6158      | Bacilli | 0 | 0 | 0  | 0 | 0 |
| Listeria_monocytogenes_Finland_1998_u     | Bacilli | 0 | 0 | 0  | 0 | 0 |
| Listeria_monocytogenes_FSL_R2_561_u       | Bacilli | 0 | 0 | 0  | 0 | 0 |
| Listeria_monocytogenes_HCC23_uid5920      | Bacilli | 0 | 0 | 0  | 0 | 0 |
| Listeria_monocytogenes_J0161_uid5445      | Bacilli | 1 | 0 | 0  | 0 | 0 |
| Listeria_monocytogenes_J1_220_uid1797     | Bacilli | 0 | 0 | 0  | 0 | 0 |
| Listeria_monocytogenes_J1816_uid17973     | Bacilli | 0 | 0 | 0  | 0 | 0 |
| Listeria_monocytogenes_L312_uid17576      | Bacilli | 0 | 0 | 0  | 0 | 0 |
| Listeria_monocytogenes_serotype_4a_L9     | Bacilli | 0 | 0 | 0  | 0 | 0 |
| Listeria_monocytogenes_M7_uid162131       | Bacilli | 0 | 0 | 0  | 0 | 0 |
| Listeria_monocytogenes_N53_1_uid1937      | Bacilli | 0 | 0 | 0  | 0 | 0 |
| Listeria_monocytogenes_Clip80459_uid5     | Bacilli | 0 | 0 | 0  | 0 | 0 |
| Listeria_monocytogenes_serotype_4b_F2     | Bacilli | 0 | 0 | 0  | 0 | 0 |
| Listeria_monocytogenes_serotype_4b_LL     | Bacilli | 0 | 0 | 0  | 0 | 0 |
| Listeria_monocytogenes_serotype_7_SLC     | Bacilli | 1 | 0 | 0  | 0 | 0 |
| Listeria_monocytogenes_SLCC2372_uid1      | Bacilli | 0 | 0 | 0  | 0 | 0 |
| Listeria_monocytogenes_SLCC2376_uid1      | Bacilli | 0 | 0 | 0  | 0 | 0 |

|                                              |         |   |   |   |   |   |
|----------------------------------------------|---------|---|---|---|---|---|
| Listeria_monocytogenes_SLCC2378_uid17        | Bacilli | 0 | 0 | 0 | 0 | 0 |
| Listeria_monocytogenes_SLCC2479_uid17        | Bacilli | 0 | 0 | 0 | 0 | 0 |
| Listeria_monocytogenes_SLCC2540_uid17        | Bacilli | 1 | 0 | 0 | 0 | 0 |
| Listeria_monocytogenes_serotype_1_2b_Bacilli |         | 1 | 0 | 0 | 0 | 0 |
| Listeria_monocytogenes_SLCC5850_uid17        | Bacilli | 1 | 0 | 0 | 0 | 0 |
| Listeria_monocytogenes_SLCC7179_uid17        | Bacilli | 0 | 0 | 0 | 0 | 0 |
| Listeria_seeligeri_serovar_1_2b_SLCC395      | Bacilli | 0 | 0 | 0 | 0 | 0 |
| Listeria_welshimeri_serovar_6b_SLCC533       | Bacilli | 0 | 0 | 0 | 0 | 0 |
| Brevibacillus_brevis_NBRC_100599_uid59       | Bacilli | 0 | 0 | 5 | 3 | 0 |
| Paenibacillus_larvae_04_309_uid232355        | Bacilli | 0 | 0 | 8 | 4 | 0 |
| Paenibacillus_mucilaginosus_3016_uid89       | Bacilli | 0 | 0 | 0 | 0 | 0 |
| Paenibacillus_mucilaginosus_K02_uid162       | Bacilli | 0 | 0 | 0 | 0 | 0 |
| Paenibacillus_mucilaginosus_KNP414_uid       | Bacilli | 0 | 0 | 0 | 0 | 0 |
| Paenibacillus_polymyxa_CR1_uid231659         | Bacilli | 0 | 0 | 0 | 1 | 0 |
| Paenibacillus_polymyxa_E681_uid53477         | Bacilli | 0 | 0 | 0 | 0 | 0 |
| Paenibacillus_polymyxa_M1_uid162159          | Bacilli | 0 | 0 | 3 | 1 | 0 |
| Paenibacillus_polymyxa_SC2_uid59583          | Bacilli | 0 | 0 | 8 | 0 | 0 |
| Paenibacillus_JDR_2_uid59021                 | Bacilli | 0 | 0 | 0 | 0 | 0 |
| Paenibacillus_Y412MC10_uid41127              | Bacilli | 0 | 0 | 1 | 2 | 0 |
| Paenibacillus_terrae_HPL_003_uid82371        | Bacilli | 0 | 0 | 1 | 1 | 0 |
| Thermobacillus_composti_KWC4_uid740          | Bacilli | 0 | 0 | 0 | 0 | 0 |
| Solibacillus_silvestris_StLB046_uid168516    | Bacilli | 0 | 0 | 0 | 0 | 0 |
| Macrococcus_caseolyticus_JCSC5402_uid        | Bacilli | 0 | 0 | 0 | 0 | 0 |
| Staphylococcus_aureus_04_02981_uid16         | Bacilli | 0 | 0 | 0 | 0 | 0 |
| Staphylococcus_aureus_08BA02176_uid1         | Bacilli | 0 | 0 | 0 | 0 | 0 |
| Staphylococcus_aureus_Bmb9393_uid216         | Bacilli | 0 | 0 | 0 | 5 | 0 |
| Staphylococcus_aureus_CC45_uid209174         | Bacilli | 0 | 0 | 0 | 0 | 0 |
| Staphylococcus_aureus_M1_uid197263           | Bacilli | 0 | 0 | 0 | 4 | 0 |
| Staphylococcus_aureus_RF122_uid57661         | Bacilli | 0 | 0 | 0 | 0 | 0 |
| Staphylococcus_aureus_11819_97_uid151        | Bacilli | 0 | 0 | 0 | 2 | 0 |
| Staphylococcus_aureus_55_2053_uid559         | Bacilli | 0 | 0 | 0 | 0 | 0 |
| Staphylococcus_aureus_6850_uid217772         | Bacilli | 0 | 0 | 0 | 7 | 0 |
| Staphylococcus_aureus_COL_uid57797           | Bacilli | 0 | 0 | 0 | 1 | 0 |
| Staphylococcus_aureus_ECT_R_2_uid159         | Bacilli | 0 | 0 | 0 | 0 | 0 |
| Staphylococcus_aureus_ED133_uid15968         | Bacilli | 0 | 0 | 0 | 0 | 0 |
| Staphylococcus_aureus_ED98_uid41455          | Bacilli | 0 | 0 | 0 | 0 | 0 |
| Staphylococcus_aureus_HO_5096_0412_uid       | Bacilli | 0 | 0 | 0 | 6 | 0 |
| Staphylococcus_aureus_JH1_uid58457           | Bacilli | 0 | 0 | 0 | 0 | 0 |
| Staphylococcus_aureus_JH9_uid58455           | Bacilli | 0 | 0 | 0 | 0 | 0 |
| Staphylococcus_aureus_JKD6159_uid159         | Bacilli | 0 | 0 | 0 | 0 | 0 |
| Staphylococcus_aureus_LGA251_uid1593         | Bacilli | 0 | 0 | 0 | 0 | 0 |
| Staphylococcus_aureus_M013_uid88065          | Bacilli | 0 | 0 | 0 | 7 | 0 |
| Staphylococcus_aureus_MRSA252_uid578         | Bacilli | 0 | 0 | 0 | 0 | 0 |
| Staphylococcus_aureus_MSHR1132_uid81         | Bacilli | 0 | 0 | 0 | 0 | 0 |
| Staphylococcus_aureus_MSSA476_uid578         | Bacilli | 0 | 0 | 0 | 0 | 0 |
| Staphylococcus_aureus_Mu3_uid58817           | Bacilli | 0 | 0 | 0 | 0 | 0 |
| Staphylococcus_aureus_Mu50_uid57835          | Bacilli | 0 | 0 | 0 | 0 | 0 |
| Staphylococcus_aureus_MW2_uid57903           | Bacilli | 0 | 0 | 0 | 1 | 0 |
| Staphylococcus_aureus_N315_uid57837          | Bacilli | 0 | 0 | 0 | 0 | 0 |
| Staphylococcus_aureus_NCTC_8325_uid5         | Bacilli | 0 | 0 | 0 | 1 | 0 |
| Staphylococcus_aureus_SA40_uid221289         | Bacilli | 0 | 0 | 0 | 7 | 0 |
| Staphylococcus_aureus_SA957_uid22128         | Bacilli | 0 | 0 | 0 | 7 | 0 |
| Staphylococcus_aureus_ST228_10388_uid        | Bacilli | 0 | 0 | 0 | 0 | 0 |
| Staphylococcus_aureus_ST228_10497_uid        | Bacilli | 0 | 0 | 0 | 0 | 0 |
| Staphylococcus_aureus_ST228_15532_uid        | Bacilli | 0 | 0 | 0 | 0 | 0 |
| Staphylococcus_aureus_ST228_16035_uid        | Bacilli | 0 | 0 | 0 | 0 | 0 |

|                                         |         |   |   |    |   |   |
|-----------------------------------------|---------|---|---|----|---|---|
| Staphylococcus_aureus_ST228_18412_uid   | Bacilli | 0 | 0 | 0  | 0 | 0 |
| Staphylococcus_aureus_uid193758         | Bacilli | 0 | 0 | 0  | 0 | 0 |
| Staphylococcus_aureus_uid193759         | Bacilli | 0 | 0 | 0  | 0 | 0 |
| Staphylococcus_aureus_uid193761         | Bacilli | 0 | 0 | 0  | 0 | 0 |
| Staphylococcus_aureus_ST398_uid15924    | Bacilli | 0 | 0 | 0  | 0 | 0 |
| Staphylococcus_aureus_71193_uid16214    | Bacilli | 0 | 0 | 0  | 0 | 0 |
| Staphylococcus_aureus_CN1_uid217769     | Bacilli | 0 | 0 | 0  | 1 | 0 |
| Staphylococcus_aureus_JKD6008_uid159    | Bacilli | 0 | 0 | 0  | 2 | 0 |
| Staphylococcus_aureus_Newman_uid588     | Bacilli | 0 | 0 | 0  | 2 | 0 |
| Staphylococcus_aureus_T0131_uid15986    | Bacilli | 0 | 0 | 0  | 2 | 0 |
| Staphylococcus_aureus_TCH60_uid15985    | Bacilli | 0 | 0 | 0  | 0 | 0 |
| Staphylococcus_aureus_TW20_uid15924     | Bacilli | 0 | 0 | 0  | 4 | 0 |
| Staphylococcus_aureus_USA300_FPR375     | Bacilli | 0 | 0 | 0  | 2 | 0 |
| Staphylococcus_aureus_USA300_TCH151     | Bacilli | 0 | 0 | 0  | 2 | 0 |
| Staphylococcus_aureus_VC40_uid88071     | Bacilli | 0 | 0 | 0  | 2 | 0 |
| Staphylococcus_aureus_Z172_uid225604    | Bacilli | 0 | 0 | 0  | 4 | 0 |
| Staphylococcus_carnosus_TM300_uid594    | Bacilli | 0 | 0 | 1  | 0 | 0 |
| Staphylococcus_epidermidis_ATCC_1222    | Bacilli | 0 | 0 | 0  | 4 | 0 |
| Staphylococcus_epidermidis_RP62A_uid5   | Bacilli | 0 | 0 | 0  | 3 | 0 |
| Staphylococcus_haemolyticus_JCSC1435    | Bacilli | 0 | 0 | 0  | 2 | 0 |
| Staphylococcus_lugdunensis_HKU09_01     | Bacilli | 0 | 0 | 0  | 1 | 0 |
| Staphylococcus_lugdunensis_N920143_uid  | Bacilli | 0 | 0 | 0  | 1 | 0 |
| Staphylococcus_pasteuri_SP1_uid226267   | Bacilli | 1 | 0 | 1  | 1 | 0 |
| Staphylococcus_pseudintermedius_ED99    | Bacilli | 1 | 0 | 0  | 0 | 0 |
| Staphylococcus_pseudintermedius_HKU1    | Bacilli | 0 | 0 | 0  | 0 | 0 |
| Staphylococcus_saprophyticus_ATCC_153   | Bacilli | 0 | 0 | 1  | 0 | 0 |
| Staphylococcus_warneri_SG1_uid187059    | Bacilli | 0 | 0 | 0  | 0 | 0 |
| Aerococcus_urinae_ACS_120_V_Col10a      | Bacilli | 0 | 0 | 0  | 0 | 0 |
| Carnobacterium_maltaromaticum_LMA2      | Bacilli | 0 | 0 | 0  | 0 | 0 |
| Carnobacterium_17_4_uid65789            | Bacilli | 0 | 0 | 0  | 0 | 0 |
| Carnobacterium_WN1359_uid225603         | Bacilli | 0 | 0 | 0  | 0 | 0 |
| Enterococcus_casseliflavus_EC20_uid556  | Bacilli | 0 | 0 | 1  | 0 | 0 |
| Enterococcus_faecalis_D32_uid171261     | Bacilli | 1 | 0 | 1  | 0 | 0 |
| Enterococcus_faecalis_OG1RF_uid54927    | Bacilli | 1 | 0 | 1  | 0 | 0 |
| Enterococcus_faecalis_Symbioflor_1_uid  | Bacilli | 0 | 0 | 1  | 2 | 0 |
| Enterococcus_faecalis_V583_uid57669     | Bacilli | 0 | 0 | 1  | 1 | 0 |
| Enterococcus_faecium_Aus0004_uid8702    | Bacilli | 0 | 0 | 2  | 1 | 0 |
| Enterococcus_faecium_Aus0085_uid2144    | Bacilli | 0 | 0 | 5  | 5 | 0 |
| Enterococcus_faecium_DO_uid55353        | Bacilli | 0 | 0 | 2  | 1 | 0 |
| Enterococcus_faecium_NRRL_B_2354_uid    | Bacilli | 0 | 0 | 1  | 1 | 0 |
| Enterococcus_hirae_ATCC_9790_uid7061    | Bacilli | 1 | 0 | 1  | 0 | 0 |
| Enterococcus_mundtii_QU_25_uid22942     | Bacilli | 1 | 0 | 4  | 1 | 1 |
| Enterococcus_7L76_uid197170             | Bacilli | 1 | 0 | 1  | 0 | 0 |
| Melissococcus_plutonius_ATCC_35311_uid  | Bacilli | 0 | 0 | 0  | 0 | 0 |
| Melissococcus_plutonius_DAT561_uid89    | Bacilli | 0 | 0 | 0  | 0 | 0 |
| Tetragenococcus_halophilus_uid74441     | Bacilli | 0 | 0 | 2  | 7 | 0 |
| Lactobacillus_acidophilus_30SC_uid6360  | Bacilli | 0 | 0 | 6  | 3 | 0 |
| Lactobacillus_acidophilus_La_14_uid2014 | Bacilli | 0 | 0 | 7  | 0 | 0 |
| Lactobacillus_acidophilus_NCFM_uid576   | Bacilli | 0 | 0 | 5  | 0 | 0 |
| Lactobacillus_amylovorus_GRL_1112_uid   | Bacilli | 0 | 0 | 17 | 5 | 0 |
| Lactobacillus_amylovorus_GRL1118_uid1   | Bacilli | 0 | 0 | 8  | 6 | 0 |
| Lactobacillus_brevis_ATCC_367_uid5798   | Bacilli | 0 | 0 | 0  | 0 | 0 |
| Lactobacillus_brevis_KB290_uid195560    | Bacilli | 0 | 0 | 0  | 0 | 0 |
| Lactobacillus_buchneri_uid73657         | Bacilli | 1 | 0 | 0  | 0 | 0 |
| Lactobacillus_buchneri_NRRL_B_30929_u   | Bacilli | 1 | 0 | 0  | 0 | 0 |
| Lactobacillus_casei_ATCC_334_uid57985   | Bacilli | 0 | 0 | 0  | 0 | 0 |

|                                          |         |   |   |    |    |    |
|------------------------------------------|---------|---|---|----|----|----|
| Lactobacillus_casei_BD_II_uid162119      | Bacilli | 1 | 0 | 0  | 0  | 0  |
| Lactobacillus_casei_BL23_uid59237        | Bacilli | 1 | 0 | 0  | 0  | 0  |
| Lactobacillus_casei_LC2W_uid162121       | Bacilli | 1 | 0 | 0  | 0  | 0  |
| Lactobacillus_casei_LOCK919_uid210959    | Bacilli | 1 | 0 | 0  | 0  | 0  |
| Lactobacillus_casei_Zhang_uid50673       | Bacilli | 1 | 0 | 0  | 0  | 0  |
| Lactobacillus_casei_W56_uid178736        | Bacilli | 1 | 0 | 0  | 0  | 0  |
| Lactobacillus_paracasei_8700_2_uid5529   | Bacilli | 1 | 0 | 0  | 0  | 0  |
| Lactobacillus_crispatus_ST1_uid48359     | Bacilli | 0 | 0 | 10 | 0  | 13 |
| Lactobacillus_delbrueckii_bulgaricus_203 | Bacilli | 1 | 0 | 9  | 0  | 2  |
| Lactobacillus_delbrueckii_bulgaricus_ATC | Bacilli | 0 | 1 | 2  | 0  | 1  |
| Lactobacillus_delbrueckii_bulgaricus_ATC | Bacilli | 0 | 1 | 3  | 0  | 1  |
| Lactobacillus_delbrueckii_bulgaricus_NDC | Bacilli | 0 | 2 | 20 | 3  | 12 |
| Lactobacillus_fermentum_CECT_5716_uic    | Bacilli | 0 | 0 | 10 | 0  | 0  |
| Lactobacillus_fermentum_F6_uid203391     | Bacilli | 0 | 0 | 43 | 41 | 0  |
| Lactobacillus_fermentum_IFO_3956_uid5    | Bacilli | 0 | 0 | 9  | 10 | 0  |
| Lactobacillus_gasseri_ATCC_33323_uid57   | Bacilli | 0 | 0 | 0  | 0  | 0  |
| Lactobacillus_helveticus_CNRZ32_uid212   | Bacilli | 0 | 0 | 0  | 0  | 0  |
| Lactobacillus_helveticus_DPC_4571_uid5   | Bacilli | 0 | 0 | 31 | 0  | 7  |
| Lactobacillus_helveticus_H10_uid162017   | Bacilli | 0 | 0 | 29 | 1  | 1  |
| Lactobacillus_helveticus_R0052_uid1744   | Bacilli | 0 | 0 | 27 | 0  | 2  |
| Lactobacillus_johnsonii_DPC_6026_uid16   | Bacilli | 1 | 0 | 5  | 1  | 0  |
| Lactobacillus_johnsonii_FI9785_uid41735  | Bacilli | 0 | 0 | 3  | 1  | 0  |
| Lactobacillus_johnsonii_N6_2_uid229876   | Bacilli | 0 | 0 | 5  | 2  | 0  |
| Lactobacillus_johnsonii_NCC_533_uid580   | Bacilli | 0 | 0 | 2  | 1  | 0  |
| Lactobacillus_kefiranofaciens_ZW3_uid67  | Bacilli | 0 | 0 | 16 | 3  | 11 |
| Lactobacillus_plantarum_16_uid209042     | Bacilli | 0 | 0 | 0  | 0  | 0  |
| Lactobacillus_plantarum_JDM1_uid59361    | Bacilli | 0 | 0 | 0  | 0  | 0  |
| Lactobacillus_plantarum_P8_uid203333     | Bacilli | 0 | 0 | 0  | 0  | 0  |
| Lactobacillus_plantarum_ST_III_uid53537  | Bacilli | 0 | 0 | 0  | 0  | 0  |
| Lactobacillus_plantarum_WCFS1_uid6291    | Bacilli | 0 | 0 | 0  | 0  | 0  |
| Lactobacillus_plantarum_ZJ316_uid18868   | Bacilli | 1 | 0 | 0  | 0  | 0  |
| Lactobacillus_reuteri_DSM_20016_uid58    | Bacilli | 0 | 0 | 5  | 19 | 0  |
| Lactobacillus_reuteri_I5007_uid208677    | Bacilli | 0 | 0 | 6  | 7  | 0  |
| Lactobacillus_reuteri_JCM_1112_uid5887   | Bacilli | 0 | 0 | 5  | 19 | 0  |
| Lactobacillus_reuteri_SD2112_uid55357    | Bacilli | 0 | 0 | 17 | 18 | 0  |
| Lactobacillus_reuteri_TD1_uid213089      | Bacilli | 0 | 0 | 3  | 3  | 0  |
| Lactobacillus_rhamnosus_ATCC_8530_uic    | Bacilli | 0 | 0 | 3  | 0  | 3  |
| Lactobacillus_rhamnosus_GG_uid161983     | Bacilli | 1 | 0 | 2  | 0  | 0  |
| Lactobacillus_rhamnosus_GG_uid59313      | Bacilli | 1 | 0 | 2  | 0  | 0  |
| Lactobacillus_rhamnosus_Lc_705_uid593    | Bacilli | 0 | 0 | 3  | 0  | 2  |
| Lactobacillus_rhamnosus_LOCK900_uid21    | Bacilli | 1 | 0 | 5  | 0  | 4  |
| Lactobacillus_rhamnosus_LOCK908_uid21    | Bacilli | 0 | 0 | 3  | 0  | 3  |
| Lactobacillus_ruminis_ATCC_27782_uid7    | Bacilli | 0 | 0 | 8  | 6  | 0  |
| Lactobacillus_sakei_23K_uid58281         | Bacilli | 0 | 0 | 0  | 0  | 0  |
| Lactobacillus_salivarius_CECT_5713_uid1  | Bacilli | 1 | 0 | 3  | 0  | 0  |
| Lactobacillus_salivarius_UCC118_uid5823  | Bacilli | 1 | 0 | 3  | 3  | 0  |
| Lactobacillus_sanfranciscensis_TMW_1_1   | Bacilli | 1 | 0 | 10 | 9  | 0  |
| Pediococcus_clausenii_ATCC_BAA_344_1     | Bacilli | 0 | 0 | 0  | 0  | 0  |
| Pediococcus_pentosaceus_ATCC_25745_1     | Bacilli | 0 | 0 | 0  | 0  | 0  |
| Pediococcus_pentosaceus_SL4_uid22721     | Bacilli | 1 | 0 | 0  | 0  | 0  |
| Leuconostoc_carnosum_JB16_uid176371      | Bacilli | 0 | 0 | 0  | 0  | 0  |
| Leuconostoc_citreum_KM20_uid58481        | Bacilli | 0 | 0 | 0  | 0  | 0  |
| Leuconostoc_gasicomitatum_LMG_18811      | Bacilli | 0 | 0 | 0  | 0  | 0  |
| Leuconostoc_gelidum_JB7_uid175682        | Bacilli | 1 | 0 | 0  | 0  | 0  |
| Leuconostoc_kimchii_IMSNU_11154_uid      | Bacilli | 0 | 0 | 0  | 1  | 0  |
| Leuconostoc_mesenteroides_ATCC_8293      | Bacilli | 0 | 0 | 0  | 0  | 0  |

|                                                   |   |   |   |   |   |
|---------------------------------------------------|---|---|---|---|---|
| Leuconostoc_mesenteroides_J18_uid843: Bacilli     | 0 | 0 | 0 | 0 | 0 |
| Leuconostoc_C2_uid68743 Bacilli                   | 0 | 0 | 0 | 1 | 0 |
| Oenococcus_oeni_PSU_1_uid59417 Bacilli            | 0 | 0 | 0 | 0 | 0 |
| Weissella_koreensis_KACC_15510_uid688 Bacilli     | 0 | 0 | 0 | 0 | 0 |
| Lactococcus_garvieae_ATCC_49156_uid7: Bacilli     | 0 | 0 | 0 | 0 | 0 |
| Lactococcus_garvieae_Lg2_uid161935 Bacilli        | 0 | 0 | 0 | 0 | 0 |
| Lactococcus_lactis_cremoris_A76_uid160 Bacilli    | 0 | 0 | 0 | 0 | 0 |
| Lactococcus_lactis_cremoris_KW2_uid21: Bacilli    | 0 | 0 | 0 | 0 | 0 |
| Lactococcus_lactis_cremoris_MG1363_uid: Bacilli   | 0 | 0 | 0 | 0 | 0 |
| Lactococcus_lactis_cremoris_NZ9000_uid: Bacilli   | 0 | 0 | 0 | 0 | 0 |
| Lactococcus_lactis_cremoris_SK11_uid57: Bacilli   | 0 | 0 | 0 | 0 | 0 |
| Lactococcus_lactis_cremoris_UC509_9_uid: Bacilli  | 0 | 0 | 0 | 0 | 0 |
| Lactococcus_lactis_CV56_uid160253 Bacilli         | 0 | 0 | 0 | 0 | 0 |
| Lactococcus_lactis_II1403_uid57671 Bacilli        | 0 | 0 | 0 | 0 | 0 |
| Lactococcus_lactis_IO_1_uid192185 Bacilli         | 0 | 0 | 0 | 0 | 0 |
| Lactococcus_lactis_KF147_uid42831 Bacilli         | 0 | 0 | 0 | 0 | 0 |
| Lactococcus_lactis_KLDS_4_0325_uid225: Bacilli    | 0 | 0 | 0 | 0 | 0 |
| Streptococcus_agalactiae_2_22_uid2022: Bacilli    | 1 | 0 | 0 | 0 | 0 |
| Streptococcus_agalactiae_09mas018883_Bacilli      | 1 | 0 | 0 | 0 | 0 |
| Streptococcus_agalactiae_GD201008_00: Bacilli     | 1 | 0 | 0 | 0 | 0 |
| Streptococcus_agalactiae_ILRI005_uid208: Bacilli  | 1 | 0 | 0 | 0 | 0 |
| Streptococcus_agalactiae_ILRI112_uid208: Bacilli  | 1 | 0 | 0 | 0 | 0 |
| Streptococcus_agalactiae_SA20_06_uid1: Bacilli    | 1 | 0 | 0 | 0 | 0 |
| Streptococcus_agalactiae_A909_uid5793: Bacilli    | 1 | 0 | 0 | 0 | 0 |
| Streptococcus_agalactiae_NEM316_uid6: Bacilli     | 1 | 0 | 0 | 0 | 0 |
| Streptococcus_agalactiae_2603V_R_uid5: Bacilli    | 1 | 0 | 0 | 0 | 0 |
| Streptococcus_anginosus_C1051_uid218: Bacilli     | 1 | 0 | 0 | 0 | 0 |
| Streptococcus_anginosus_C238_uid218: Bacilli      | 0 | 0 | 0 | 0 | 0 |
| Streptococcus_constellatus_pharyngis_C1: Bacilli  | 0 | 0 | 0 | 0 | 0 |
| Streptococcus_constellatus_pharyngis_C2: Bacilli  | 0 | 0 | 0 | 0 | 0 |
| Streptococcus_constellatus_pharyngis_C8: Bacilli  | 0 | 0 | 0 | 0 | 0 |
| Streptococcus_intermedius_B196_uid218: Bacilli    | 1 | 0 | 0 | 0 | 0 |
| Streptococcus_intermedius_C270_uid217: Bacilli    | 0 | 0 | 0 | 0 | 0 |
| Streptococcus_intermedius_JTH08_uid16: Bacilli    | 0 | 0 | 0 | 0 | 0 |
| Streptococcus_dysgalactiae_equisimilis_1: Bacilli | 0 | 0 | 0 | 1 | 0 |
| Streptococcus_dysgalactiae_equisimilis_A: Bacilli | 1 | 0 | 0 | 0 | 0 |
| Streptococcus_dysgalactiae_equisimilis_A: Bacilli | 1 | 0 | 0 | 0 | 0 |
| Streptococcus_dysgalactiae_equisimilis_C: Bacilli | 1 | 0 | 0 | 0 | 0 |
| Streptococcus_dysgalactiae_equisimilis_R: Bacilli | 1 | 0 | 0 | 0 | 0 |
| Streptococcus_equi_4047_uid59259 Bacilli          | 0 | 0 | 0 | 2 | 0 |
| Streptococcus_equi_zooepidemicus_uid5: Bacilli    | 0 | 0 | 0 | 0 | 0 |
| Streptococcus_equi_zooepidemicus_ATC: Bacilli     | 0 | 0 | 0 | 8 | 0 |
| Streptococcus_equi_zooepidemicus_MGC: Bacilli     | 1 | 0 | 0 | 2 | 0 |
| Streptococcus_gallolyticus_ATCC_43143_ Bacilli    | 2 | 0 | 0 | 0 | 0 |
| Streptococcus_gallolyticus_ATCC_BAA_2: Bacilli    | 1 | 0 | 0 | 0 | 0 |
| Streptococcus_gallolyticus_UCN34_uid46: Bacilli   | 2 | 0 | 0 | 0 | 0 |
| Streptococcus_gordonii_Challis_substr_ ( Bacilli  | 1 | 0 | 0 | 0 | 0 |
| Streptococcus_infantarius_CJ18_uid8703: Bacilli   | 1 | 0 | 0 | 0 | 0 |
| Streptococcus_iniae_SF1_uid206041 Bacilli         | 1 | 0 | 0 | 5 | 0 |
| Streptococcus_lutetiensis_033_uid21339: Bacilli   | 1 | 0 | 0 | 0 | 0 |
| Streptococcus_macedonicus_ACA_DC_19: Bacilli      | 1 | 0 | 0 | 0 | 0 |
| Streptococcus_mitis_B6_uid46097 Bacilli           | 0 | 0 | 0 | 4 | 0 |
| Streptococcus_mutans_GS_5_uid169223 Bacilli       | 1 | 0 | 0 | 4 | 0 |
| Streptococcus_mutans_LJ23_uid162197 Bacilli       | 1 | 0 | 0 | 1 | 0 |
| Streptococcus_mutans_NN2025_uid4635: Bacilli      | 1 | 0 | 0 | 1 | 0 |
| Streptococcus_mutans_UA159_uid57947: Bacilli      | 1 | 0 | 0 | 2 | 0 |

|                                        |         |   |   |   |    |   |
|----------------------------------------|---------|---|---|---|----|---|
| Streptococcus_oligofermentans_AS_1_30  | Bacilli | 0 | 0 | 0 | 0  | 0 |
| Streptococcus_oralis_Uo5_uid65449      | Bacilli | 0 | 0 | 0 | 0  | 0 |
| Streptococcus_parasanguinis_ATCC_1591  | Bacilli | 0 | 0 | 0 | 2  | 0 |
| Streptococcus_parasanguinis_FW213_uid  | Bacilli | 0 | 0 | 0 | 4  | 0 |
| Streptococcus_parauberis_KCTC_11537_1  | Bacilli | 0 | 0 | 0 | 2  | 0 |
| Streptococcus_pasteurianus_ATCC_43144  | Bacilli | 1 | 0 | 0 | 1  | 0 |
| Streptococcus_pneumoniae_670_6B_uid5   | Bacilli | 0 | 0 | 0 | 0  | 0 |
| Streptococcus_pneumoniae_70585_uid5    | Bacilli | 0 | 0 | 0 | 1  | 0 |
| Streptococcus_pneumoniae_A026_uid22    | Bacilli | 0 | 0 | 0 | 1  | 0 |
| Streptococcus_pneumoniae_AP200_uid5    | Bacilli | 0 | 0 | 0 | 1  | 0 |
| Streptococcus_pneumoniae_ATCC_70066    | Bacilli | 0 | 0 | 0 | 0  | 0 |
| Streptococcus_pneumoniae_CGSP14_uid    | Bacilli | 0 | 0 | 0 | 0  | 0 |
| Streptococcus_pneumoniae_D39_uid585    | Bacilli | 0 | 0 | 0 | 0  | 0 |
| Streptococcus_pneumoniae_G54_uid591    | Bacilli | 0 | 0 | 0 | 0  | 0 |
| Streptococcus_pneumoniae_gamPNI0373    | Bacilli | 0 | 0 | 0 | 1  | 0 |
| Streptococcus_pneumoniae_Hungary19A    | Bacilli | 0 | 0 | 0 | 0  | 0 |
| Streptococcus_pneumoniae_INV104_uid1   | Bacilli | 0 | 0 | 0 | 0  | 0 |
| Streptococcus_pneumoniae_INV200_uid1   | Bacilli | 0 | 0 | 0 | 0  | 0 |
| Streptococcus_pneumoniae_JJA_uid5912   | Bacilli | 0 | 0 | 0 | 1  | 0 |
| Streptococcus_pneumoniae_OXC141_uid    | Bacilli | 0 | 0 | 0 | 0  | 0 |
| Streptococcus_pneumoniae_P1031_uid5    | Bacilli | 0 | 0 | 0 | 0  | 0 |
| Streptococcus_pneumoniae_R6_uid5785    | Bacilli | 0 | 0 | 0 | 0  | 0 |
| Streptococcus_pneumoniae_SPN034156     | Bacilli | 0 | 0 | 0 | 0  | 0 |
| Streptococcus_pneumoniae_SPN034183     | Bacilli | 0 | 0 | 0 | 0  | 0 |
| Streptococcus_pneumoniae_SPN994038     | Bacilli | 0 | 0 | 0 | 0  | 0 |
| Streptococcus_pneumoniae_SPN994039     | Bacilli | 0 | 0 | 0 | 0  | 0 |
| Streptococcus_pneumoniae_SPNA45_uid    | Bacilli | 0 | 0 | 0 | 1  | 0 |
| Streptococcus_pneumoniae_ST556_uid1    | Bacilli | 0 | 0 | 0 | 0  | 0 |
| Streptococcus_pneumoniae_Taiwan19F     | Bacilli | 0 | 0 | 0 | 0  | 0 |
| Streptococcus_pneumoniae_TCH8431_19    | Bacilli | 0 | 0 | 0 | 1  | 0 |
| Streptococcus_pneumoniae_TIGR4_uid57   | Bacilli | 0 | 0 | 0 | 2  | 0 |
| Streptococcus_pseudopneumoniae_IS749   | Bacilli | 0 | 0 | 0 | 1  | 0 |
| Streptococcus_pyogenes_A20_uid178106   | Bacilli | 1 | 0 | 0 | 0  | 0 |
| Streptococcus_pyogenes_HSC5_uid21297   | Bacilli | 0 | 0 | 0 | 0  | 0 |
| Streptococcus_pyogenes_MGAS1882_uid    | Bacilli | 1 | 0 | 0 | 1  | 0 |
| Streptococcus_pyogenes_M1_476_uid19    | Bacilli | 1 | 0 | 0 | 0  | 0 |
| Streptococcus_pyogenes_M1_GAS_uid57    | Bacilli | 1 | 0 | 0 | 0  | 0 |
| Streptococcus_pyogenes_MGAS5005_uid    | Bacilli | 1 | 0 | 0 | 0  | 0 |
| Streptococcus_pyogenes_MGAS2096_uid    | Bacilli | 1 | 0 | 0 | 0  | 0 |
| Streptococcus_pyogenes_MGAS9429_uid    | Bacilli | 1 | 0 | 0 | 0  | 0 |
| Streptococcus_pyogenes_MGAS8232_uid    | Bacilli | 0 | 0 | 0 | 0  | 0 |
| Streptococcus_pyogenes_MGAS10270_ui    | Bacilli | 1 | 0 | 0 | 0  | 0 |
| Streptococcus_pyogenes_MGAS6180_uid    | Bacilli | 1 | 0 | 0 | 0  | 0 |
| Streptococcus_pyogenes_MGAS315_uid5    | Bacilli | 1 | 0 | 0 | 0  | 0 |
| Streptococcus_pyogenes_SSI_1_uid57895  | Bacilli | 1 | 0 | 0 | 0  | 0 |
| Streptococcus_pyogenes_MGAS10750_ui    | Bacilli | 1 | 0 | 0 | 0  | 0 |
| Streptococcus_pyogenes_NZ131_uid5903   | Bacilli | 1 | 0 | 0 | 0  | 0 |
| Streptococcus_pyogenes_Manfredo_uid5   | Bacilli | 0 | 0 | 0 | 0  | 0 |
| Streptococcus_pyogenes_Alab49_uid162   | Bacilli | 0 | 0 | 0 | 0  | 0 |
| Streptococcus_pyogenes_MGAS15252_ui    | Bacilli | 1 | 0 | 0 | 1  | 0 |
| Streptococcus_pyogenes_MGAS10394_ui    | Bacilli | 0 | 0 | 0 | 0  | 0 |
| Streptococcus_salivarius_CCHSS3_uid704 | Bacilli | 0 | 0 | 0 | 19 | 0 |
| Streptococcus_salivarius_JIM8777_uid16 | Bacilli | 1 | 0 | 0 | 3  | 0 |
| Streptococcus_sanguinis_SK36_uid58381  | Bacilli | 0 | 0 | 0 | 0  | 0 |
| Streptococcus_I_G2_uid224251           | Bacilli | 1 | 0 | 0 | 0  | 0 |
| Streptococcus_I_P16_uid224252          | Bacilli | 0 | 0 | 0 | 0  | 0 |

|                                        |            |   |   |    |    |   |
|----------------------------------------|------------|---|---|----|----|---|
| Streptococcus_suis_05ZYH33_uid58663    | Bacilli    | 0 | 0 | 0  | 4  | 0 |
| Streptococcus_suis_98HAH33_uid58665    | Bacilli    | 0 | 0 | 0  | 4  | 0 |
| Streptococcus_suis_A7_uid162111        | Bacilli    | 0 | 0 | 0  | 5  | 0 |
| Streptococcus_suis_BM407_uid59321      | Bacilli    | 0 | 0 | 0  | 2  | 0 |
| Streptococcus_suis_D12_uid162127       | Bacilli    | 0 | 0 | 0  | 5  | 0 |
| Streptococcus_suis_D9_uid162125        | Bacilli    | 1 | 0 | 0  | 3  | 0 |
| Streptococcus_suis_GZ1_uid161937       | Bacilli    | 0 | 0 | 0  | 5  | 0 |
| Streptococcus_suis_JS14_uid162095      | Bacilli    | 0 | 0 | 0  | 5  | 0 |
| Streptococcus_suis_P1_7_uid32235       | Bacilli    | 0 | 0 | 0  | 2  | 0 |
| Streptococcus_suis_S735_uid174333      | Bacilli    | 0 | 0 | 0  | 4  | 0 |
| Streptococcus_suis_SC070731_uid193769  | Bacilli    | 0 | 0 | 0  | 1  | 0 |
| Streptococcus_suis_SC84_uid59323       | Bacilli    | 0 | 0 | 0  | 2  | 0 |
| Streptococcus_suis_SS12_uid162123      | Bacilli    | 0 | 0 | 0  | 5  | 0 |
| Streptococcus_suis_ST1_uid167482       | Bacilli    | 1 | 0 | 0  | 41 | 0 |
| Streptococcus_suis_ST3_uid66327        | Bacilli    | 1 | 0 | 0  | 2  | 0 |
| Streptococcus_suis_T15_uid226112       | Bacilli    | 0 | 0 | 0  | 2  | 0 |
| Streptococcus_suis_TL13_uid203123      | Bacilli    | 0 | 0 | 0  | 2  | 0 |
| Streptococcus_thermophilus_CNRZ1066_   | Bacilli    | 1 | 0 | 0  | 3  | 0 |
| Streptococcus_thermophilus_JIM_8232_   | Bacilli    | 1 | 0 | 0  | 3  | 0 |
| Streptococcus_thermophilus_LMD_9_uid   | Bacilli    | 2 | 0 | 0  | 2  | 0 |
| Streptococcus_thermophilus_LMG_18311   | Bacilli    | 1 | 0 | 0  | 2  | 0 |
| Streptococcus_thermophilus_MN_ZLW_0    | Bacilli    | 2 | 0 | 0  | 0  | 0 |
| Streptococcus_thermophilus_ND03_uid1   | Bacilli    | 2 | 0 | 0  | 0  | 0 |
| Streptococcus_uberis_0140J_uid57959    | Bacilli    | 0 | 0 | 0  | 0  | 0 |
| Alkaliphilus_metalliredigens_QYMF_uid5 | Clostridia | 0 | 0 | 3  | 10 | 0 |
| Alkaliphilus_oremlandii_OhILAs_uid5849 | Clostridia | 0 | 0 | 0  | 0  | 0 |
| Candidatus_Arthromitus_SFB_mouse_Jap   | Clostridia | 0 | 0 | 0  | 0  | 0 |
| Candidatus_Arthromitus_SFB_mouse_Yit   | Clostridia | 0 | 0 | 0  | 0  | 0 |
| Candidatus_Arthromitus_SFB_rat_Yit_uid | Clostridia | 0 | 0 | 0  | 0  | 0 |
| Clostridium_acetobutylicum_ATCC_824_   | Clostridia | 0 | 0 | 0  | 1  | 0 |
| Clostridium_acetobutylicum_DSM_1731_   | Clostridia | 0 | 0 | 0  | 1  | 0 |
| Clostridium_acetobutylicum_EA_2018_ui  | Clostridia | 0 | 0 | 0  | 1  | 0 |
| Clostridium_acidurici_9a_uid176126     | Clostridia | 0 | 0 | 10 | 3  | 4 |
| Clostridium_autoethanogenum_DSM_10     | Clostridia | 0 | 0 | 1  | 2  | 0 |
| Clostridium_beijerinckii_NCIMB_8052_ui | Clostridia | 0 | 0 | 0  | 0  | 0 |
| Clostridium_botulinum_A_ATCC_19397_    | Clostridia | 0 | 0 | 0  | 0  | 0 |
| Clostridium_botulinum_A_ATCC_3502_ui   | Clostridia | 0 | 0 | 0  | 0  | 0 |
| Clostridium_botulinum_A_Hall_uid58931  | Clostridia | 0 | 0 | 0  | 0  | 0 |
| Clostridium_botulinum_A2_Kyoto_uid59   | Clostridia | 0 | 0 | 0  | 0  | 0 |
| Clostridium_botulinum_A3_Loch_Maree_   | Clostridia | 0 | 1 | 3  | 2  | 0 |
| Clostridium_botulinum_B_Eklund_17B_ui  | Clostridia | 0 | 0 | 0  | 0  | 0 |
| Clostridium_botulinum_B1_Okra_uid591   | Clostridia | 0 | 0 | 5  | 0  | 0 |
| Clostridium_botulinum_Ba4_657_uid591   | Clostridia | 0 | 1 | 8  | 3  | 1 |
| Clostridium_botulinum_BKT015925_uid6   | Clostridia | 0 | 0 | 7  | 0  | 4 |
| Clostridium_botulinum_E3_Alaska_E43_u  | Clostridia | 0 | 0 | 1  | 0  | 1 |
| Clostridium_botulinum_F_230613_uid15   | Clostridia | 0 | 0 | 1  | 0  | 0 |
| Clostridium_botulinum_F_Langeland_uid  | Clostridia | 0 | 0 | 0  | 0  | 0 |
| Clostridium_botulinum_H04402_065_uid   | Clostridia | 0 | 0 | 2  | 0  | 0 |
| Clostridium_cellulolyticum_H10_uid5870 | Clostridia | 1 | 0 | 1  | 10 | 0 |
| Clostridium_cellulovorans_743B_uid5150 | Clostridia | 0 | 0 | 0  | 13 | 0 |
| Clostridium_clariflavum_DSM_19732_uid  | Clostridia | 0 | 0 | 0  | 10 | 0 |
| Clostridium_kluyveri_DSM_555_uid5888   | Clostridia | 0 | 0 | 3  | 2  | 1 |
| Clostridium_kluyveri_NBRC_12016_uid59  | Clostridia | 0 | 0 | 3  | 2  | 0 |
| Clostridium_ljungdahlii_DSM_13528_uid5 | Clostridia | 0 | 0 | 1  | 0  | 0 |
| Clostridium_novyi_NT_uid58643          | Clostridia | 0 | 0 | 0  | 0  | 0 |
| Clostridium_pasteurianum_BC1_uid2014   | Clostridia | 0 | 0 | 6  | 2  | 0 |

|                                                          |            |   |   |    |    |    |
|----------------------------------------------------------|------------|---|---|----|----|----|
| Clostridium_perfringens_ATCC_13124_uid57681              | Clostridia | 0 | 0 | 3  | 0  | 0  |
| Clostridium_perfringens_13_uid57681                      | Clostridia | 0 | 0 | 7  | 3  | 0  |
| Clostridium_phytofermentans_ISDg_uid57681                | Clostridia | 0 | 0 | 3  | 0  | 0  |
| Clostridium_saccharobutylicum_DSM_1313_uid57681          | Clostridia | 0 | 0 | 3  | 0  | 4  |
| Clostridium_cf_saccharolyticum_K10_uid57681              | Clostridia | 0 | 0 | 0  | 2  | 0  |
| Clostridium_saccharolyticum_WM1_uid57681                 | Clostridia | 0 | 0 | 0  | 5  | 0  |
| Clostridium_saccharoperbutylacetonicum_DSM_1313_uid57681 | Clostridia | 0 | 0 | 1  | 0  | 0  |
| Clostridium_BNL1100_uid84307                             | Clostridia | 0 | 0 | 1  | 0  | 0  |
| Clostridium_SY8519_uid68705                              | Clostridia | 0 | 0 | 1  | 0  | 0  |
| Clostridium_tetani_12124569_uid227214                    | Clostridia | 0 | 0 | 0  | 4  | 0  |
| Clostridium_tetani_E88_uid57683                          | Clostridia | 0 | 0 | 6  | 8  | 0  |
| Clostridium_thermocellum_ATCC_27405_uid57683             | Clostridia | 0 | 0 | 0  | 2  | 0  |
| Clostridium_thermocellum_DSM_1313_uid57683               | Clostridia | 0 | 0 | 0  | 11 | 0  |
| Anaerococcus_prevotii_DSM_20548_uid57683                 | Clostridia | 0 | 0 | 0  | 0  | 0  |
| Finegoldia_magna_ATCC_29328_uid5886                      | Clostridia | 1 | 1 | 9  | 3  | 0  |
| Sulfobacillus_acidophilus_DSM_10332_uid5886              | Clostridia | 0 | 0 | 1  | 1  | 1  |
| Sulfobacillus_acidophilus_TPY_uid68841                   | Clostridia | 0 | 0 | 1  | 0  | 0  |
| Thermaerobacter_marianensis_DSM_128_uid68841             | Clostridia | 0 | 0 | 0  | 0  | 1  |
| Symbiobacterium_thermophilum_IAM_14_uid68841             | Clostridia | 0 | 0 | 0  | 0  | 0  |
| Acetobacterium_woodii_DSM_1030_uid84307                  | Clostridia | 0 | 0 | 0  | 1  | 0  |
| Eubacterium_eligens_ATCC_27750_uid59777                  | Clostridia | 0 | 0 | 1  | 2  | 0  |
| Eubacterium_limosum_KIST612_uid59777                     | Clostridia | 0 | 0 | 4  | 0  | 0  |
| Eubacterium_rectale_ATCC_33656_uid59777                  | Clostridia | 1 | 0 | 1  | 0  | 2  |
| Eubacterium_rectale_uid197161                            | Clostridia | 0 | 0 | 1  | 0  | 2  |
| Eubacterium_rectale_uid197162                            | Clostridia | 0 | 2 | 5  | 1  | 0  |
| Eubacterium_siraeum_uid197160                            | Clostridia | 0 | 0 | 0  | 1  | 0  |
| Eubacterium_siraeum_V10Sc8a_uid197160                    | Clostridia | 0 | 0 | 0  | 0  | 0  |
| Heliobacterium_modesticaldum_Ice1_uid197165              | Clostridia | 0 | 0 | 6  | 0  | 2  |
| _Ruminococcus_obeum_uid197165                            | Clostridia | 0 | 0 | 1  | 0  | 0  |
| _Ruminococcus_torques_uid197166                          | Clostridia | 0 | 0 | 1  | 0  | 0  |
| Butyrivibrio_fibrisolvens_uid197155                      | Clostridia | 1 | 0 | 0  | 1  | 0  |
| Butyrivibrio_proteoclasticus_B316_uid5174                | Clostridia | 0 | 0 | 10 | 9  | 1  |
| Clostridium_lentocellum_DSM_5427_uid5174                 | Clostridia | 0 | 0 | 0  | 1  | 0  |
| Coprococcus_catus_GD_7_uid197174                         | Clostridia | 1 | 1 | 3  | 2  | 0  |
| Coprococcus_ART55_1_uid197176                            | Clostridia | 0 | 0 | 0  | 0  | 0  |
| Roseburia_hominis_A2_183_uid73419                        | Clostridia | 0 | 0 | 0  | 7  | 0  |
| Roseburia_intestinalis_uid197164                         | Clostridia | 1 | 0 | 0  | 2  | 0  |
| Roseburia_intestinalis_XB6B4_uid197179                   | Clostridia | 0 | 0 | 0  | 1  | 0  |
| Oscillibacter_valericigenes_uid73895                     | Clostridia | 0 | 0 | 0  | 0  | 0  |
| Candidatus_Desulforudis_audaxviator_MI197179             | Clostridia | 0 | 1 | 9  | 4  | 4  |
| Dehalobacter_CF_uid177714                                | Clostridia | 0 | 0 | 0  | 1  | 0  |
| Dehalobacter_11DCA_uid177715                             | Clostridia | 0 | 0 | 0  | 0  | 0  |
| Desulfitobacterium_dehalogenans_ATCC_27405               | Clostridia | 0 | 0 | 0  | 0  | 0  |
| Desulfitobacterium_dichloroeliminans_LN197179            | Clostridia | 0 | 0 | 0  | 0  | 0  |
| Desulfitobacterium_hafniense_DCB_2_uid197179             | Clostridia | 0 | 0 | 2  | 3  | 0  |
| Desulfitobacterium_hafniense_Y51_uid5886                 | Clostridia | 0 | 0 | 2  | 4  | 0  |
| Desulfosporosinus_acidiphilus_SJ4_uid15174               | Clostridia | 0 | 0 | 0  | 1  | 0  |
| Desulfosporosinus_meridiei_DSM_13257                     | Clostridia | 0 | 0 | 0  | 1  | 0  |
| Desulfosporosinus_orientis_DSM_765_uid197179             | Clostridia | 0 | 0 | 0  | 0  | 0  |
| Desulfotomaculum_acetoxidans_DSM_7713                    | Clostridia | 0 | 0 | 28 | 13 | 7  |
| Desulfotomaculum_carboxydvorans_CO197179                 | Clostridia | 0 | 0 | 14 | 1  | 9  |
| Desulfotomaculum_gibsoniae_DSM_7213                      | Clostridia | 0 | 0 | 10 | 14 | 3  |
| Desulfotomaculum_kuznetsovii_DSM_6113                    | Clostridia | 0 | 1 | 19 | 1  | 20 |
| Desulfotomaculum_reducens_MI_1_uid57683                  | Clostridia | 0 | 0 | 1  | 1  | 0  |
| Desulfotomaculum_ruminis_DSM_2154_uid197179              | Clostridia | 0 | 0 | 0  | 1  | 0  |
| Pelotomaculum_thermopropionicum_SI197179                 | Clostridia | 0 | 1 | 1  | 4  | 0  |



|                                                       |   |   |    |   |    |
|-------------------------------------------------------|---|---|----|---|----|
| Syntrophobotulus_glycolicus_DSM_8271_ Clostridia      | 0 | 0 | 0  | 0 | 0  |
| Thermincola_potens_JR_uid48823 Clostridia             | 0 | 0 | 0  | 0 | 1  |
| Filifactor_alocis_ATCC_35896_uid46625 Clostridia      | 1 | 0 | 0  | 9 | 0  |
| Clostridium_difficile_630_uid57679 Clostridia         | 0 | 0 | 10 | 3 | 0  |
| Clostridium_difficile_BI1_uid158363 Clostridia        | 0 | 0 | 22 | 8 | 2  |
| Clostridium_difficile_CD196_uid41017 Clostridia       | 0 | 0 | 17 | 0 | 0  |
| Clostridium_difficile_R20291_uid40921 Clostridia      | 0 | 0 | 16 | 0 | 0  |
| _Clostridium__sticklandii_uid59585 Clostridia         | 0 | 0 | 2  | 0 | 1  |
| Ethanoligenens_harbinense_YUAN_3_uid Clostridia       | 0 | 0 | 1  | 4 | 0  |
| Faecalibacterium_prausnitzii_L2_6_uid19 Clostridia    | 0 | 0 | 0  | 1 | 0  |
| Faecalibacterium_prausnitzii_uid197157 Clostridia     | 0 | 0 | 0  | 1 | 0  |
| Ruminococcus_albus_7_uid51721 Clostridia              | 0 | 0 | 11 | 4 | 0  |
| Ruminococcus_bromii_uid197158 Clostridia              | 0 | 0 | 0  | 1 | 0  |
| Ruminococcus_champanellensis_18P13_ Clostridia        | 0 | 0 | 1  | 0 | 0  |
| Ruminococcus_uid197156 Clostridia                     | 0 | 0 | 5  | 1 | 0  |
| Clostridium_stercorarium_DSM_8532_uic Clostridia      | 0 | 0 | 0  | 0 | 0  |
| Clostridium_stercorarium_DSM_8532_uic Clostridia      | 0 | 0 | 0  | 0 | 0  |
| Syntrophomonas_wolfei_Goettingen_uid Clostridia       | 0 | 0 | 0  | 6 | 0  |
| Syntrophothermus_lipocalidus_DSM_126 Clostridia       | 0 | 0 | 0  | 0 | 0  |
| butyrate_producing_bacterium_SM4_1_ Clostridia        | 0 | 0 | 1  | 0 | 0  |
| butyrate_producing_bacterium_SS3_4_ ui Clostridia     | 0 | 0 | 1  | 2 | 0  |
| butyrate_producing_bacterium_SSC_2_ ui Clostridia     | 0 | 0 | 4  | 2 | 0  |
| Clostridiales_genomosp__BVAB3_UPII9_5 Clostridia      | 0 | 0 | 4  | 2 | 0  |
| Halanaerobium_hydrogeniformans_uid60 Clostridia       | 0 | 0 | 5  | 3 | 0  |
| Halanaerobium_praevalens_DSM_2228_ Clostridia         | 0 | 0 | 4  | 6 | 0  |
| Halothermothrix_orenii_H_168_uid58585 Clostridia      | 0 | 0 | 0  | 0 | 0  |
| Acetohalobium_arabaticum_DSM_5501_ Clostridia         | 0 | 2 | 22 | 4 | 1  |
| Halobacteroides_halobius_DSM_5150_uic Clostridia      | 0 | 3 | 2  | 0 | 0  |
| Natranaerobius_thermophilus_JW_NM_V Clostridia        | 0 | 1 | 3  | 2 | 0  |
| Thermoanaerobacter_tengcongensis_MB Clostridia        | 0 | 0 | 15 | 1 | 12 |
| Carboxydothermus_hydrogenoformans_Z Clostridia        | 0 | 0 | 8  | 2 | 0  |
| Ammonifex_degensii_KC4_uid41053 Clostridia            | 0 | 5 | 51 | 4 | 24 |
| Moorella_thermoacetica_ATCC_39073_ ui Clostridia      | 0 | 0 | 0  | 0 | 0  |
| Tepidanaerobacter_Re1_uid66873 Clostridia             | 0 | 0 | 0  | 1 | 0  |
| Tepidanaerobacter_acetatoxydans_Re1_ Clostridia       | 0 | 0 | 0  | 1 | 0  |
| Thermacetogenium_phaeum_DSM_1227( Clostridia          | 0 | 0 | 10 | 3 | 5  |
| Thermoanaerobacter_brockii_finnii_Ako_ Clostridia     | 0 | 0 | 8  | 1 | 2  |
| Thermoanaerobacter_italicus_Ab9_uid46 Clostridia      | 0 | 0 | 2  | 0 | 0  |
| Thermoanaerobacter_mathranii_A3_uid4 Clostridia       | 0 | 0 | 0  | 0 | 0  |
| Thermoanaerobacter_pseudethanolicus_ Clostridia       | 0 | 0 | 9  | 1 | 7  |
| Thermoanaerobacter_X513_uid53065 Clostridia           | 0 | 0 | 4  | 0 | 1  |
| Thermoanaerobacter_X514_uid58589 Clostridia           | 0 | 0 | 4  | 0 | 3  |
| Thermoanaerobacter_wiegeli_Rt8_B1_ ui Clostridia      | 0 | 0 | 3  | 2 | 1  |
| Caldicellulosiruptor_bescii_DSM_6725_ ui Clostridia   | 0 | 3 | 10 | 4 | 1  |
| Caldicellulosiruptor_hydrothermalis_108_ Clostridia   | 0 | 2 | 8  | 1 | 2  |
| Caldicellulosiruptor_kristjanssonii_177R11 Clostridia | 0 | 1 | 14 | 2 | 3  |
| Caldicellulosiruptor_kronotskyensis_2002 Clostridia   | 0 | 1 | 8  | 1 | 3  |
| Caldicellulosiruptor_lactoaceticus_6A_uic Clostridia  | 0 | 1 | 11 | 4 | 2  |
| Caldicellulosiruptor_obsidiansis_OB47_ ui Clostridia  | 0 | 0 | 17 | 3 | 0  |
| Caldicellulosiruptor_owensensis_OL_uid6 Clostridia    | 0 | 0 | 0  | 1 | 0  |
| Caldicellulosiruptor_saccharolyticus_DSM Clostridia   | 0 | 0 | 9  | 2 | 7  |
| Thermoanaerobacterium_thermosacchar Clostridia        | 0 | 0 | 4  | 2 | 0  |
| Thermoanaerobacterium_thermosacchar Clostridia        | 0 | 1 | 0  | 1 | 0  |
| Thermoanaerobacterium_xylanolyticum_ Clostridia       | 0 | 0 | 0  | 6 | 0  |
| Thermosediminibacter_oceani_DSM_166 Clostridia        | 0 | 0 | 0  | 0 | 1  |
| Mahella_australiensis_50_1_BON_uid669 Clostridia      | 0 | 3 | 3  | 0 | 0  |

|                                                           |   |   |   |   |   |
|-----------------------------------------------------------|---|---|---|---|---|
| Coprothermobacter_proteolyticus_DSM_Clostridia            | 0 | 0 | 0 | 0 | 0 |
| Thermodesulfobium_narugense_DSM_14_Clostridia             | 0 | 0 | 0 | 0 | 0 |
| Erysipelothrix_rhusiopathiae_Fujisawa_ui_Erysipelotrichia | 0 | 0 | 0 | 0 | 0 |
| Erysipelothrix_rhusiopathiae_SY1027_uid_Erysipelotrichia  | 0 | 0 | 0 | 0 | 0 |
| Eubacterium_cylindroides_T2_87_uid197_Erysipelotrichia    | 0 | 0 | 0 | 0 | 0 |
| Acholeplasma_laidlawii_PG_8A_uid58901_Mollicutes          | 0 | 0 | 0 | 0 | 0 |
| Candidatus_Phytoplasma_mali_uid59087_Mollicutes           | 0 | 0 | 0 | 0 | 0 |
| Candidatus_Phytoplasma_australiense_ui_Mollicutes         | 0 | 0 | 0 | 0 | 0 |
| Strawberry_lethal_yellows_phytoplasma_Mollicutes          | 0 | 0 | 0 | 0 | 0 |
| Candidatus_Phytoplasma_solani_284_09_Mollicutes           | 0 | 0 | 0 | 0 | 0 |
| Aster_yellows_witches_broom_phytoplas_Mollicutes          | 0 | 0 | 0 | 0 | 0 |
| Onion_yellows_phytoplasma_OY_M_uid5_Mollicutes            | 0 | 0 | 0 | 0 | 0 |
| Mesoplasma_florum_L1_uid58055_Mollicutes                  | 0 | 0 | 0 | 0 | 0 |
| Mesoplasma_florum_W37_uid224253_Mollicutes                | 0 | 0 | 0 | 0 | 0 |
| Spiroplasma_apis_B31_uid230613_Mollicutes                 | 1 | 0 | 0 | 0 | 0 |
| Spiroplasma_chrysopicola_DF_1_uid2050_Mollicutes          | 0 | 0 | 0 | 0 | 0 |
| Spiroplasma_diminutum_CUAS_1_uid212_Mollicutes            | 0 | 0 | 0 | 0 | 0 |
| Spiroplasma_syrphidicola_EA_1_uid2050_Mollicutes          | 1 | 0 | 0 | 0 | 0 |
| Spiroplasma_taiwanense_CT_1_uid21297_Mollicutes           | 0 | 0 | 0 | 0 | 0 |
| Candidatus_Mycoplasma_haemolamae_P_Mollicutes             | 0 | 0 | 0 | 0 | 0 |
| Candidatus_Mycoplasma_haemominutun_Mollicutes             | 0 | 0 | 0 | 0 | 0 |
| Mycoplasma_agalactiae_uid46679_Mollicutes                 | 0 | 0 | 0 | 0 | 0 |
| Mycoplasma_agalactiae_PG2_uid61619_Mollicutes             | 0 | 0 | 0 | 0 | 0 |
| Mycoplasma_arthritis_158L3_1_uid580_Mollicutes            | 0 | 0 | 0 | 0 | 0 |
| Mycoplasma_bovis_HB0801_uid168665_Mollicutes              | 0 | 0 | 0 | 0 | 0 |
| Mycoplasma_bovis_Hubei_1_uid68691_Mollicutes              | 0 | 0 | 0 | 0 | 0 |
| Mycoplasma_bovis_PG45_uid60859_Mollicutes                 | 0 | 0 | 0 | 0 | 0 |
| Mycoplasma_conjunctivae_uid59325_Mollicutes               | 0 | 0 | 0 | 0 | 0 |
| Mycoplasma_crocodyli_MP145_uid47087_Mollicutes            | 0 | 0 | 0 | 0 | 0 |
| Mycoplasma_cynos_C142_uid184824_Mollicutes                | 1 | 0 | 0 | 0 | 0 |
| Mycoplasma_fermentans_JER_uid53543_Mollicutes             | 0 | 0 | 0 | 0 | 0 |
| Mycoplasma_fermentans_M64_uid62099_Mollicutes             | 0 | 0 | 0 | 0 | 0 |
| Mycoplasma_fermentans_PG18_uid1971_Mollicutes             | 0 | 0 | 0 | 0 | 0 |
| Mycoplasma_gallisepticum_CA06_2006_(Mollicutes            | 1 | 0 | 0 | 0 | 0 |
| Mycoplasma_gallisepticum_NC06_2006_(Mollicutes            | 0 | 0 | 0 | 0 | 0 |
| Mycoplasma_gallisepticum_NC08_2008_(Mollicutes            | 0 | 0 | 0 | 0 | 0 |
| Mycoplasma_gallisepticum_NC95_13295_Mollicutes            | 1 | 0 | 0 | 0 | 0 |
| Mycoplasma_gallisepticum_NC96_1596_(Mollicutes            | 1 | 0 | 0 | 0 | 0 |
| Mycoplasma_gallisepticum_NY01_2001_(Mollicutes            | 1 | 0 | 0 | 0 | 0 |
| Mycoplasma_gallisepticum_S6_uid20052_Mollicutes           | 1 | 0 | 0 | 0 | 0 |
| Mycoplasma_gallisepticum_F_uid162001_Mollicutes           | 1 | 0 | 0 | 0 | 0 |
| Mycoplasma_gallisepticum_R_high_uid1_Mollicutes           | 1 | 0 | 0 | 0 | 0 |
| Mycoplasma_gallisepticum_R_low_uid5_Mollicutes            | 1 | 0 | 0 | 0 | 0 |
| Mycoplasma_gallisepticum_VA94_7994_(Mollicutes            | 0 | 0 | 0 | 0 | 0 |
| Mycoplasma_gallisepticum_WI01_2001_(Mollicutes            | 1 | 0 | 0 | 0 | 0 |
| Mycoplasma_genitalium_G37_uid57707_Mollicutes             | 0 | 0 | 0 | 0 | 0 |
| Mycoplasma_genitalium_M2288_uid173_Mollicutes             | 0 | 0 | 0 | 0 | 0 |
| Mycoplasma_genitalium_M2321_uid173_Mollicutes             | 0 | 0 | 0 | 0 | 0 |
| Mycoplasma_genitalium_M6282_uid173_Mollicutes             | 0 | 0 | 0 | 0 | 0 |
| Mycoplasma_genitalium_M6320_uid173_Mollicutes             | 0 | 0 | 0 | 0 | 0 |
| Mycoplasma_haemocanis_Illinois_uid823_Mollicutes          | 0 | 0 | 0 | 0 | 0 |
| Mycoplasma_haemofelis_Ohio2_uid1620_Mollicutes            | 0 | 0 | 0 | 0 | 0 |
| Mycoplasma_haemofelis_Langford_1_uid_Mollicutes           | 0 | 0 | 0 | 0 | 0 |
| Mycoplasma_hominis_ATCC_23114_uid4_Mollicutes             | 0 | 0 | 0 | 0 | 0 |
| Mycoplasma_hyopneumoniae_168_uid16_Mollicutes             | 0 | 0 | 0 | 0 | 0 |
| Mycoplasma_hyopneumoniae_168_L_uid_Mollicutes             | 0 | 0 | 0 | 0 | 0 |

|                                         |                  |   |   |    |   |    |
|-----------------------------------------|------------------|---|---|----|---|----|
| Mycoplasma_hyopneumoniae_232_uid58      | Mollicutes       | 0 | 0 | 0  | 0 | 0  |
| Mycoplasma_hyopneumoniae_7422_uid2      | Mollicutes       | 0 | 0 | 0  | 0 | 0  |
| Mycoplasma_hyopneumoniae_7448_uid5      | Mollicutes       | 0 | 0 | 0  | 0 | 0  |
| Mycoplasma_hyopneumoniae_J_uid5805      | Mollicutes       | 0 | 0 | 0  | 0 | 0  |
| Mycoplasma_hyorhinis_DBS_1050_uid22     | Mollicutes       | 0 | 0 | 0  | 0 | 0  |
| Mycoplasma_hyorhinis_GDL_1_uid87003     | Mollicutes       | 0 | 0 | 0  | 0 | 0  |
| Mycoplasma_hyorhinis_HUB_1_uid51695     | Mollicutes       | 0 | 0 | 0  | 0 | 0  |
| Mycoplasma_hyorhinis_MCLD_uid16208      | Mollicutes       | 0 | 0 | 0  | 0 | 0  |
| Mycoplasma_hyorhinis_SK76_uid181997     | Mollicutes       | 0 | 0 | 0  | 0 | 0  |
| Mycoplasma_mobile_163K_uid58077         | Mollicutes       | 1 | 0 | 0  | 0 | 0  |
| Mycoplasma_capricolum_ATCC_27343_u      | Mollicutes       | 0 | 0 | 0  | 0 | 0  |
| Mycoplasma_leachii_99_014_6_uid16203    | Mollicutes       | 0 | 0 | 0  | 0 | 0  |
| Mycoplasma_leachii_PG50_uid60849        | Mollicutes       | 0 | 0 | 0  | 0 | 0  |
| Mycoplasma_mycooides_capri_LC_95010     | Mollicutes       | 0 | 0 | 0  | 0 | 0  |
| Mycoplasma_mycooides_SC_Gladysdale_u    | Mollicutes       | 0 | 0 | 0  | 0 | 0  |
| Mycoplasma_mycooides_SC_PG1_uid5803     | Mollicutes       | 0 | 0 | 0  | 0 | 0  |
| Mycoplasma_ovis_Michigan_uid232247      | Mollicutes       | 0 | 0 | 0  | 0 | 0  |
| Mycoplasma_parvum_Indiana_uid223375     | Mollicutes       | 0 | 0 | 0  | 0 | 0  |
| Mycoplasma_penetrans_HF_2_uid57729      | Mollicutes       | 0 | 0 | 0  | 0 | 0  |
| Mycoplasma_pneumoniae_309_uid85495      | Mollicutes       | 0 | 0 | 0  | 0 | 0  |
| Mycoplasma_pneumoniae_FH_uid162027      | Mollicutes       | 0 | 0 | 0  | 0 | 0  |
| Mycoplasma_pneumoniae_M129_uid577       | Mollicutes       | 0 | 0 | 0  | 0 | 0  |
| Mycoplasma_pneumoniae_M129_B7_uid       | Mollicutes       | 0 | 0 | 0  | 0 | 0  |
| Mycoplasma_pulmonis_UAB_CTIP_uid61      | Mollicutes       | 0 | 0 | 0  | 0 | 0  |
| Mycoplasma_putrefaciens_KS1_uid72481    | Mollicutes       | 0 | 0 | 0  | 0 | 0  |
| Mycoplasma_putrefaciens_Mput9231_uir    | Mollicutes       | 0 | 0 | 0  | 0 | 0  |
| Mycoplasma_suis_KI3806_uid63665         | Mollicutes       | 0 | 0 | 0  | 0 | 0  |
| Mycoplasma_suis_Illinois_uid61897       | Mollicutes       | 0 | 0 | 0  | 0 | 0  |
| Mycoplasma_synoviae_53_uid58061         | Mollicutes       | 1 | 0 | 0  | 0 | 0  |
| Mycoplasma_wenyonii_Massachusetts_u     | Mollicutes       | 0 | 0 | 0  | 0 | 0  |
| Ureaplasma_parvum_serovar_3_ATCC_27     | Mollicutes       | 0 | 0 | 0  | 0 | 0  |
| Ureaplasma_parvum_serovar_3_ATCC_7      | Mollicutes       | 0 | 0 | 0  | 0 | 0  |
| Ureaplasma_urealyticum_serovar_10_AT    | Mollicutes       | 0 | 0 | 0  | 0 | 0  |
| Acidaminococcus_fermentans_DSM_207      | Negativicutes    | 0 | 0 | 1  | 1 | 0  |
| Acidaminococcus_intestini_RyC_MR95_uir  | Negativicutes    | 1 | 0 | 0  | 1 | 1  |
| Megamonas_hypermegale_uid197163         | Negativicutes    | 0 | 0 | 0  | 2 | 0  |
| Megasphaera_elsdenii_DSM_20460_uid7     | Negativicutes    | 0 | 0 | 14 | 0 | 0  |
| Selenomonas_ruminantium_lactilytica_T   | Negativicutes    | 0 | 0 | 13 | 0 | 11 |
| Selenomonas_sputigena_ATCC_35185_uir    | Negativicutes    | 0 | 0 | 0  | 6 | 0  |
| Veillonella_parvula_DSM_2008_uid41927   | Negativicutes    | 0 | 0 | 0  | 0 | 0  |
| Fusobacterium_4_8_uid205051             | Fusobacteria     | 0 | 0 | 8  | 1 | 0  |
| Fusobacterium_nucleatum_ATCC_25586      | Fusobacteria     | 0 | 0 | 0  | 2 | 0  |
| Fusobacterium_3_1_36A2_uid55995         | Fusobacteria     | 1 | 0 | 0  | 7 | 0  |
| Ilyobacter_polytropus_DSM_2926_uid59    | Fusobacteria     | 1 | 0 | 0  | 2 | 0  |
| Leptotrichia_buccalis_C_1013_b_uid5921  | Fusobacteria     | 0 | 0 | 7  | 3 | 0  |
| Sebaldella_termitidis_ATCC_33386_uid41  | Fusobacteria     | 0 | 0 | 0  | 2 | 0  |
| Streptobacillus_moniliformis_DSM_1211   | Fusobacteria     | 1 | 0 | 0  | 1 | 0  |
| Gemmatimonas_aurantiaca_T_27_uid588     | Gemmatimonadetes | 0 | 0 | 0  | 0 | 0  |
| Leptospirillum_ferrooxidans_C2_3_uid15  | Nitrospirae      | 0 | 0 | 12 | 6 | 1  |
| Leptospirillum_ferriphilum_ML_04_uid17  | Nitrospirae      | 0 | 0 | 0  | 0 | 1  |
| Candidatus_Nitrospira_defluvii_uid51175 | Nitrospirae      | 0 | 0 | 0  | 2 | 2  |
| Thermodesulfovibrio_yellowstonii_DSM    | Nitrospirae      | 0 | 0 | 1  | 0 | 0  |
| Phycisphaera_mikurensis_NBRC_102666     | Phycisphaerae    | 0 | 0 | 0  | 5 | 0  |
| Isosphaera_pallida_ATCC_43644_uid6220   | Planctomycetia   | 0 | 0 | 0  | 1 | 0  |
| Pirellula_staleyii_DSM_6068_uid43209    | Planctomycetia   | 0 | 0 | 0  | 3 | 1  |
| Planctomyces_brasiliensis_DSM_5305_uir  | Planctomycetia   | 0 | 0 | 0  | 6 | 0  |

|                                           |                     |   |   |   |   |   |
|-------------------------------------------|---------------------|---|---|---|---|---|
| Planctomyces_limnophilus_DSM_3776_uid     | Planctomycetia      | 0 | 0 | 0 | 5 | 0 |
| Rhodopirellula_baltica_SH_1_uid61589      | Planctomycetia      | 0 | 0 | 0 | 4 | 0 |
| Singulisphaera_acidiphila_DSM_18658_uid   | Planctomycetia      | 0 | 0 | 0 | 1 | 0 |
| Asticcacaulis_excentricus_CB_48_uid5564   | Alphaproteobacteria | 0 | 0 | 0 | 0 | 0 |
| Brevundimonas_subvibrioides_ATCC_152      | Alphaproteobacteria | 0 | 0 | 0 | 0 | 0 |
| Caulobacter_segneis_ATCC_21756_uid4171    | Alphaproteobacteria | 0 | 0 | 0 | 0 | 1 |
| Caulobacter_K31_uid58551                  | Alphaproteobacteria | 0 | 0 | 0 | 1 | 0 |
| Caulobacter_crescentus_CB15_uid57891      | Alphaproteobacteria | 0 | 0 | 0 | 1 | 1 |
| Caulobacter_crescentus_NA1000_uid5931     | Alphaproteobacteria | 0 | 0 | 0 | 1 | 1 |
| Phenylobacterium_zucineum_HLK1_uid58      | Alphaproteobacteria | 0 | 0 | 0 | 0 | 0 |
| Magnetococcus_MC_1_uid57833               | Alphaproteobacteria | 0 | 0 | 0 | 2 | 0 |
| Parvularcula_bermudensis_HTCC2503_uid     | Alphaproteobacteria | 0 | 0 | 0 | 0 | 0 |
| Bartonella_australis_Aust_NH1_uid18995    | Alphaproteobacteria | 0 | 0 | 0 | 0 | 0 |
| Bartonella_bacilliformis_KC583_uid58533   | Alphaproteobacteria | 0 | 0 | 0 | 0 | 0 |
| Bartonella_clarridgeiae_73_uid62131       | Alphaproteobacteria | 0 | 0 | 0 | 0 | 0 |
| Bartonella_grahamii_as4aup_uid59405       | Alphaproteobacteria | 0 | 0 | 0 | 0 | 0 |
| Bartonella_henselae_Houston_1_uid5774     | Alphaproteobacteria | 0 | 0 | 0 | 0 | 0 |
| Bartonella_quintana_RM_11_uid174512       | Alphaproteobacteria | 0 | 0 | 0 | 0 | 0 |
| Bartonella_quintana_Toulouse_uid57635     | Alphaproteobacteria | 0 | 0 | 0 | 0 | 0 |
| Bartonella_tribocorum_CIP_105476_uid5     | Alphaproteobacteria | 0 | 0 | 0 | 0 | 0 |
| Bartonella_vinsonii_berkhoffii_Winnie_uid | Alphaproteobacteria | 0 | 0 | 0 | 0 | 0 |
| Beijerinckia_indica_ATCC_9039_uid59057    | Alphaproteobacteria | 0 | 0 | 0 | 0 | 0 |
| Methylocella_silvestris_BL2_uid59433      | Alphaproteobacteria | 0 | 0 | 0 | 0 | 0 |
| Bradyrhizobium_japonicum_USDA_110_uid     | Alphaproteobacteria | 0 | 0 | 0 | 0 | 0 |
| Bradyrhizobium_japonicum_USDA_6_uid       | Alphaproteobacteria | 0 | 0 | 0 | 0 | 0 |
| Agromonas_oligotrophica_S58_uid192181     | Alphaproteobacteria | 0 | 0 | 0 | 1 | 0 |
| Bradyrhizobium_BTAi1_uid58505             | Alphaproteobacteria | 0 | 0 | 0 | 3 | 1 |
| Bradyrhizobium_OR_278_uid58941            | Alphaproteobacteria | 0 | 0 | 0 | 2 | 0 |
| Bradyrhizobium_S23321_uid158167           | Alphaproteobacteria | 0 | 0 | 0 | 0 | 1 |
| Nitrobacter_hamburgensis_X14_uid58293     | Alphaproteobacteria | 0 | 0 | 0 | 1 | 0 |
| Nitrobacter_winogradskyi_Nb_255_uid58     | Alphaproteobacteria | 0 | 0 | 0 | 0 | 1 |
| Oligotropha_carboxidovorans_OM4_uid1      | Alphaproteobacteria | 0 | 0 | 0 | 0 | 0 |
| Oligotropha_carboxidovorans_OM5_uid7      | Alphaproteobacteria | 0 | 0 | 0 | 0 | 0 |
| Oligotropha_carboxidovorans_OM5_uid5      | Alphaproteobacteria | 0 | 0 | 0 | 0 | 0 |
| Rhodopseudomonas_palustris_BisA53_uid     | Alphaproteobacteria | 0 | 0 | 0 | 1 | 0 |
| Rhodopseudomonas_palustris_BisB18_uid     | Alphaproteobacteria | 1 | 0 | 0 | 4 | 0 |
| Rhodopseudomonas_palustris_BisB5_uid      | Alphaproteobacteria | 1 | 0 | 0 | 1 | 0 |
| Rhodopseudomonas_palustris_CGA009_uid     | Alphaproteobacteria | 0 | 0 | 0 | 0 | 0 |
| Rhodopseudomonas_palustris_DX_1_uid4      | Alphaproteobacteria | 0 | 0 | 0 | 1 | 0 |
| Rhodopseudomonas_palustris_HaA2_uid       | Alphaproteobacteria | 0 | 0 | 0 | 1 | 0 |
| Rhodopseudomonas_palustris_TIE_1_uid      | Alphaproteobacteria | 0 | 0 | 0 | 0 | 0 |
| Brucella_abortus_A13334_uid83615          | Alphaproteobacteria | 0 | 0 | 0 | 0 | 0 |
| Brucella_abortus_bv_1_9_941_uid58019      | Alphaproteobacteria | 0 | 0 | 0 | 0 | 0 |
| Brucella_abortus_S19_uid58873             | Alphaproteobacteria | 0 | 0 | 0 | 0 | 0 |
| Brucella_melitensis_biovar_Abortus_230    | Alphaproteobacteria | 0 | 0 | 0 | 0 | 0 |
| Brucella_canis_ATCC_23365_uid59009        | Alphaproteobacteria | 0 | 0 | 0 | 0 | 0 |
| Brucella_canis_HSK_A52141_uid83613        | Alphaproteobacteria | 0 | 0 | 0 | 0 | 0 |
| Brucella_ceti_TE10759_12_uid229880        | Alphaproteobacteria | 0 | 0 | 0 | 0 | 0 |
| Brucella_ceti_TE28753_12_uid229879        | Alphaproteobacteria | 0 | 0 | 0 | 0 | 0 |
| Brucella_melitensis_bv_1_16M_uid5773      | Alphaproteobacteria | 0 | 0 | 0 | 0 | 0 |
| Brucella_melitensis_ATCC_23457_uid592     | Alphaproteobacteria | 0 | 0 | 0 | 0 | 0 |
| Brucella_melitensis_M28_uid158857         | Alphaproteobacteria | 0 | 0 | 0 | 0 | 0 |
| Brucella_melitensis_M5_90_uid158855       | Alphaproteobacteria | 0 | 0 | 0 | 0 | 0 |
| Brucella_melitensis_NI_uid158853          | Alphaproteobacteria | 0 | 0 | 0 | 0 | 0 |
| Brucella_microti_CCM_4915_uid59319        | Alphaproteobacteria | 0 | 0 | 0 | 0 | 0 |
| Brucella_ovis_ATCC_25840_uid58113         | Alphaproteobacteria | 0 | 0 | 0 | 0 | 0 |

|                                         |                     |   |   |   |   |   |
|-----------------------------------------|---------------------|---|---|---|---|---|
| Brucella_pinnipedialis_B2_94_uid71131   | Alphaproteobacteria | 0 | 0 | 0 | 0 | 0 |
| Brucella_suis_1330_uid159871            | Alphaproteobacteria | 0 | 0 | 0 | 0 | 0 |
| Brucella_suis_1330_uid57927             | Alphaproteobacteria | 0 | 0 | 0 | 0 | 0 |
| Brucella_suis_ATCC_23445_uid59015       | Alphaproteobacteria | 0 | 0 | 0 | 0 | 0 |
| Brucella_suis_VBI22_uid83617            | Alphaproteobacteria | 0 | 0 | 0 | 0 | 0 |
| Ochrobactrum_anthropi_ATCC_49188_uid    | Alphaproteobacteria | 0 | 0 | 0 | 0 | 0 |
| Hyphomicrobium_denitrificans_1NES1_uid  | Alphaproteobacteria | 0 | 0 | 0 | 0 | 0 |
| Hyphomicrobium_denitrificans_ATCC_511   | Alphaproteobacteria | 0 | 0 | 0 | 0 | 0 |
| Hyphomicrobium_nitratorans_NL23_uid     | Alphaproteobacteria | 0 | 0 | 0 | 0 | 0 |
| Hyphomicrobium_MC1_uid68453             | Alphaproteobacteria | 0 | 0 | 0 | 0 | 0 |
| Pelagibacterium_halotolerans_B2_uid743  | Alphaproteobacteria | 0 | 0 | 0 | 0 | 0 |
| Rhodomicrobium_vannielii_ATCC_17100_    | Alphaproteobacteria | 0 | 0 | 0 | 0 | 0 |
| Methylobacterium_extorquens_AM1_uid     | Alphaproteobacteria | 0 | 0 | 3 | 0 | 0 |
| Methylobacterium_chloromethanicum_C     | Alphaproteobacteria | 0 | 0 | 0 | 0 | 0 |
| Methylobacterium_extorquens_DM4_uid     | Alphaproteobacteria | 0 | 0 | 0 | 0 | 0 |
| Methylobacterium_extorquens_PA1_uid5    | Alphaproteobacteria | 0 | 0 | 0 | 0 | 0 |
| Methylobacterium_nodulans_ORS_2060_     | Alphaproteobacteria | 0 | 0 | 1 | 1 | 0 |
| Methylobacterium_populi_BJ001_uid589    | Alphaproteobacteria | 0 | 0 | 2 | 0 | 0 |
| Methylobacterium_radiotolerans_JCM_2    | Alphaproteobacteria | 0 | 0 | 0 | 0 | 0 |
| Methylobacterium_4_46_uid58843          | Alphaproteobacteria | 0 | 0 | 0 | 0 | 0 |
| Methylocystis_SC2_uid174072             | Alphaproteobacteria | 0 | 0 | 0 | 0 | 0 |
| Chelativorans_BNC1_uid58069             | Alphaproteobacteria | 0 | 0 | 0 | 0 | 0 |
| Mesorhizobium_australicum_WSM2073_      | Alphaproteobacteria | 0 | 0 | 0 | 0 | 0 |
| Mesorhizobium_ciceri_biovar_biserrulae_ | Alphaproteobacteria | 0 | 0 | 0 | 1 | 0 |
| Mesorhizobium_loti_MAFF303099_uid57     | Alphaproteobacteria | 0 | 0 | 0 | 4 | 0 |
| Mesorhizobium_opportunum_WSM207         | Alphaproteobacteria | 0 | 0 | 0 | 0 | 0 |
| Candidatus_Liberibacter_americanus_Sac  | Alphaproteobacteria | 0 | 0 | 0 | 0 | 0 |
| Candidatus_Liberibacter_asiaticus_gxpsy | Alphaproteobacteria | 0 | 0 | 0 | 0 | 0 |
| Candidatus_Liberibacter_asiaticus_psy62 | Alphaproteobacteria | 0 | 0 | 0 | 0 | 0 |
| Candidatus_Liberibacter_solanacearum_C  | Alphaproteobacteria | 0 | 0 | 0 | 0 | 0 |
| bacterium_BT_1_uid184079                | Alphaproteobacteria | 0 | 0 | 0 | 0 | 0 |
| Agrobacterium_H13_3_uid63403            | Alphaproteobacteria | 0 | 0 | 0 | 0 | 0 |
| Agrobacterium_fabrum_C58_uid57865       | Alphaproteobacteria | 0 | 0 | 0 | 0 | 0 |
| Agrobacterium_radiobacter_K84_uid582    | Alphaproteobacteria | 0 | 0 | 0 | 0 | 0 |
| Agrobacterium_vitis_S4_uid58249         | Alphaproteobacteria | 0 | 0 | 0 | 0 | 0 |
| Rhizobium_etli_bv_mimosae_Mim1_uid      | Alphaproteobacteria | 0 | 0 | 0 | 0 | 0 |
| Rhizobium_etli_CFN_42_uid58377          | Alphaproteobacteria | 0 | 0 | 0 | 0 | 0 |
| Rhizobium_etli_CIAT_652_uid59115        | Alphaproteobacteria | 0 | 0 | 0 | 0 | 0 |
| Rhizobium_leguminosarum_bv_trifolii_v   | Alphaproteobacteria | 0 | 0 | 0 | 0 | 0 |
| Rhizobium_leguminosarum_bv_trifolii_v   | Alphaproteobacteria | 0 | 0 | 0 | 0 | 0 |
| Rhizobium_leguminosarum_bv_viciae_3     | Alphaproteobacteria | 0 | 0 | 0 | 0 | 0 |
| Rhizobium_IRBG74_uid222820              | Alphaproteobacteria | 0 | 0 | 0 | 0 | 0 |
| Rhizobium_tropicum_CIAT_899_uid185179   | Alphaproteobacteria | 0 | 0 | 0 | 4 | 0 |
| Sinorhizobium_fredii_HH103_uid86865     | Alphaproteobacteria | 0 | 0 | 0 | 1 | 0 |
| Rhizobium_NGR234_uid59081               | Alphaproteobacteria | 0 | 0 | 0 | 4 | 0 |
| Sinorhizobium_fredii_USDA_257_uid168    | Alphaproteobacteria | 0 | 0 | 0 | 0 | 0 |
| Sinorhizobium_medicae_WSM419_uid58      | Alphaproteobacteria | 0 | 0 | 0 | 0 | 0 |
| Sinorhizobium_meliloti_1021_uid57603    | Alphaproteobacteria | 0 | 0 | 0 | 0 | 0 |
| Sinorhizobium_meliloti_2011_uid193772   | Alphaproteobacteria | 0 | 0 | 0 | 0 | 0 |
| Sinorhizobium_meliloti_AK83_uid52607    | Alphaproteobacteria | 0 | 0 | 0 | 0 | 0 |
| Sinorhizobium_meliloti_BL225C_uid5260   | Alphaproteobacteria | 0 | 0 | 0 | 0 | 0 |
| Sinorhizobium_meliloti_GR4_uid184823    | Alphaproteobacteria | 0 | 0 | 0 | 0 | 0 |
| Sinorhizobium_meliloti_Rm41_uid176372   | Alphaproteobacteria | 0 | 0 | 0 | 0 | 0 |
| Sinorhizobium_meliloti_SM11_uid159685   | Alphaproteobacteria | 0 | 0 | 0 | 0 | 0 |
| Parvibaculum_lavamentivorans_DS_1_uid   | Alphaproteobacteria | 1 | 0 | 0 | 0 | 0 |
| Candidatus_Hodgkinia_cicadicola_Dsem_   | Alphaproteobacteria | 0 | 0 | 0 | 0 | 0 |

|                                        |                     |   |   |   |    |   |
|----------------------------------------|---------------------|---|---|---|----|---|
| Azorhizobium_caulinodans_OR5_571_uid   | Alphaproteobacteria | 0 | 0 | 0 | 0  | 0 |
| Starkeya_novella_DSM_506_uid48815      | Alphaproteobacteria | 0 | 0 | 0 | 0  | 0 |
| Xanthobacter_autotrophicus_Py2_uid584  | Alphaproteobacteria | 0 | 0 | 0 | 0  | 0 |
| Hirschia_baltica_ATCC_49814_uid59365   | Alphaproteobacteria | 0 | 0 | 0 | 0  | 0 |
| Hyphomonas_neptunium_ATCC_15444_u      | Alphaproteobacteria | 0 | 0 | 0 | 0  | 0 |
| Maricaulis_maris_MCS10_uid58689        | Alphaproteobacteria | 0 | 0 | 0 | 0  | 0 |
| Dinoroseobacter_shibae_DFL_12_uid5870  | Alphaproteobacteria | 1 | 0 | 0 | 0  | 0 |
| Jannaschia_CCS1_uid58147               | Alphaproteobacteria | 0 | 0 | 1 | 0  | 0 |
| Ketogulonicigenium_vulgare_WSH_001_u   | Alphaproteobacteria | 0 | 0 | 0 | 0  | 0 |
| Ketogulonicigenium_vulgare_Y25_uid595  | Alphaproteobacteria | 0 | 0 | 0 | 0  | 0 |
| Leisingera_methylohalidivorans_DSM_14  | Alphaproteobacteria | 0 | 0 | 0 | 0  | 0 |
| Octadecabacter_antarcticus_307_uid5470 | Alphaproteobacteria | 0 | 0 | 0 | 15 | 0 |
| Octadecabacter_arcticus_238_uid54699   | Alphaproteobacteria | 0 | 0 | 0 | 39 | 0 |
| Paracoccus_aminophilus_JCM_7686_uid2   | Alphaproteobacteria | 0 | 0 | 0 | 0  | 0 |
| Paracoccus_denitrificans_PD1222_uid581 | Alphaproteobacteria | 0 | 0 | 0 | 1  | 0 |
| Phaeobacter_gallaeciensis_2_10_uid5471 | Alphaproteobacteria | 0 | 0 | 0 | 0  | 0 |
| Phaeobacter_gallaeciensis_DSM_26640_u  | Alphaproteobacteria | 0 | 0 | 0 | 0  | 0 |
| Phaeobacter_gallaeciensis_DSM_17395_u  | Alphaproteobacteria | 0 | 0 | 0 | 0  | 0 |
| Pseudovibrio_FO_BEG1_uid82373          | Alphaproteobacteria | 0 | 0 | 0 | 0  | 0 |
| Rhodobacter_capsulatus_SB_1003_uid47   | Alphaproteobacteria | 0 | 0 | 0 | 0  | 0 |
| Rhodobacter_sphaeroides_2_4_1_uid576   | Alphaproteobacteria | 0 | 0 | 0 | 0  | 0 |
| Rhodobacter_sphaeroides_ATCC_17025_u   | Alphaproteobacteria | 0 | 0 | 0 | 0  | 0 |
| Rhodobacter_sphaeroides_ATCC_17029_u   | Alphaproteobacteria | 0 | 0 | 0 | 0  | 0 |
| Rhodobacter_sphaeroides_KD131_uid592   | Alphaproteobacteria | 0 | 0 | 0 | 0  | 0 |
| Roseobacter_denitrificans_OCh_114_uid5 | Alphaproteobacteria | 0 | 0 | 0 | 0  | 0 |
| Roseobacter_litoralis_Och_149_uid54719 | Alphaproteobacteria | 0 | 0 | 0 | 1  | 0 |
| Ruegeria_pomeroyi_DSS_3_uid57863       | Alphaproteobacteria | 0 | 0 | 0 | 1  | 0 |
| Ruegeria_TM1040_uid58193               | Alphaproteobacteria | 0 | 0 | 0 | 0  | 0 |
| Acetobacter_pasteurianus_386B_uid2144  | Alphaproteobacteria | 0 | 0 | 2 | 0  | 0 |
| Acetobacter_pasteurianus_IFO_3283_01_u | Alphaproteobacteria | 0 | 0 | 1 | 0  | 0 |
| Acetobacter_pasteurianus_IFO_3283_01_u | Alphaproteobacteria | 0 | 0 | 1 | 0  | 0 |
| Acetobacter_pasteurianus_IFO_3283_03_u | Alphaproteobacteria | 0 | 0 | 1 | 0  | 0 |
| Acetobacter_pasteurianus_IFO_3283_07_u | Alphaproteobacteria | 0 | 0 | 1 | 0  | 0 |
| Acetobacter_pasteurianus_IFO_3283_12_u | Alphaproteobacteria | 0 | 0 | 1 | 0  | 0 |
| Acetobacter_pasteurianus_IFO_3283_22_u | Alphaproteobacteria | 0 | 0 | 1 | 0  | 0 |
| Acetobacter_pasteurianus_IFO_3283_26_u | Alphaproteobacteria | 0 | 0 | 1 | 0  | 0 |
| Acetobacter_pasteurianus_IFO_3283_32_u | Alphaproteobacteria | 0 | 0 | 1 | 0  | 0 |
| Acidiphilium_cryptum_JF_5_uid58447     | Alphaproteobacteria | 0 | 0 | 3 | 1  | 1 |
| Acidiphilium_multivorum_AIU301_uid633  | Alphaproteobacteria | 0 | 0 | 0 | 0  | 0 |
| Gluconacetobacter_diazotrophicus_PAI_5 | Alphaproteobacteria | 1 | 0 | 0 | 0  | 0 |
| Gluconacetobacter_diazotrophicus_PAI_5 | Alphaproteobacteria | 1 | 0 | 0 | 0  | 0 |
| Gluconacetobacter_xylinus_NBRC_3288_u  | Alphaproteobacteria | 0 | 0 | 0 | 0  | 0 |
| Gluconobacter_oxydans_621H_uid58239    | Alphaproteobacteria | 0 | 0 | 0 | 0  | 0 |
| Gluconobacter_oxydans_H24_uid179202    | Alphaproteobacteria | 0 | 0 | 0 | 0  | 0 |
| Granulibacter_bethesdensis_CGDNIH1_u   | Alphaproteobacteria | 0 | 0 | 0 | 0  | 0 |
| Azospirillum_brasilense_Sp245_uid16216 | Alphaproteobacteria | 0 | 0 | 0 | 0  | 0 |
| Azospirillum_lipoferum_4B_uid82343     | Alphaproteobacteria | 0 | 0 | 1 | 0  | 0 |
| Azospirillum_B510_uid46085             | Alphaproteobacteria | 1 | 0 | 0 | 0  | 1 |
| Thalassobaculum_L2_uid182483           | Alphaproteobacteria | 0 | 0 | 0 | 0  | 0 |
| Magnetospirillum_gryphiswaldense_MSR   | Alphaproteobacteria | 0 | 0 | 0 | 0  | 0 |
| Magnetospirillum_magneticum_AMB_1_u    | Alphaproteobacteria | 0 | 0 | 0 | 0  | 0 |
| Rhodospirillum_centenum_SW_uid58805    | Alphaproteobacteria | 0 | 0 | 0 | 0  | 0 |
| Rhodospirillum_photometricum_uid1590   | Alphaproteobacteria | 0 | 0 | 0 | 0  | 0 |
| Rhodospirillum_rubrum_ATCC_11170_u     | Alphaproteobacteria | 1 | 0 | 0 | 1  | 0 |
| Rhodospirillum_rubrum_F11_uid162149    | Alphaproteobacteria | 1 | 0 | 0 | 0  | 0 |
| Tistrella_mobilis_KA081020_065_uid1674 | Alphaproteobacteria | 1 | 0 | 0 | 0  | 0 |

|                                          |                     |   |   |   |    |   |
|------------------------------------------|---------------------|---|---|---|----|---|
| Anaplasma_centrale_Israel_uid42155       | Alphaproteobacteria | 0 | 0 | 0 | 0  | 0 |
| Anaplasma_marginale_Dawn_uid226994       | Alphaproteobacteria | 0 | 0 | 0 | 0  | 0 |
| Anaplasma_marginale_Florida_uid58577     | Alphaproteobacteria | 0 | 0 | 0 | 0  | 0 |
| Anaplasma_marginale_Gypsy_Plains_uid2    | Alphaproteobacteria | 0 | 0 | 0 | 0  | 0 |
| Anaplasma_marginale_Maries_uid57629      | Alphaproteobacteria | 0 | 0 | 0 | 0  | 0 |
| Anaplasma_phagocytophilum_Dog2_uid2      | Alphaproteobacteria | 0 | 0 | 0 | 0  | 0 |
| Anaplasma_phagocytophilum_HZ_uid579      | Alphaproteobacteria | 0 | 0 | 0 | 0  | 0 |
| Anaplasma_phagocytophilum_HZ2_uid21      | Alphaproteobacteria | 0 | 0 | 0 | 0  | 0 |
| Anaplasma_phagocytophilum_JM_uid213      | Alphaproteobacteria | 0 | 0 | 0 | 0  | 0 |
| Ehrlichia_canis_Jake_uid58071            | Alphaproteobacteria | 0 | 0 | 0 | 0  | 0 |
| Ehrlichia_chaffeensis_Arkansas_uid57933  | Alphaproteobacteria | 0 | 0 | 0 | 0  | 0 |
| Ehrlichia_muris_AS145_uid232250          | Alphaproteobacteria | 0 | 0 | 0 | 0  | 0 |
| Ehrlichia_ruminantium_Gardel_uid58245    | Alphaproteobacteria | 0 | 0 | 0 | 0  | 0 |
| Ehrlichia_ruminantium_Welgevonden_uic    | Alphaproteobacteria | 0 | 0 | 0 | 0  | 0 |
| Ehrlichia_ruminantium_Welgevonden_uic    | Alphaproteobacteria | 0 | 0 | 0 | 0  | 0 |
| Neorickettsia_risticii_Illinois_uid58889 | Alphaproteobacteria | 0 | 0 | 0 | 0  | 0 |
| Neorickettsia_sennetsu_Miyayama_uid57    | Alphaproteobacteria | 0 | 0 | 0 | 0  | 0 |
| Wolbachia_endosymbiont_TRS_of_Brugia     | Alphaproteobacteria | 0 | 0 | 0 | 0  | 0 |
| Wolbachia_endosymbiont_of_Culex_quin     | Alphaproteobacteria | 0 | 0 | 0 | 0  | 0 |
| Wolbachia_endosymbiont_of_Drosophila     | Alphaproteobacteria | 0 | 0 | 0 | 0  | 0 |
| Wolbachia_endosymbiont_of_Drosophila     | Alphaproteobacteria | 0 | 0 | 0 | 0  | 0 |
| Wolbachia_endosymbiont_of_Drosophila     | Alphaproteobacteria | 0 | 0 | 0 | 0  | 0 |
| Wolbachia_endosymbiont_of_Onchocerc      | Alphaproteobacteria | 0 | 0 | 0 | 0  | 0 |
| Wolbachia_wRi_uid59371                   | Alphaproteobacteria | 0 | 0 | 0 | 0  | 0 |
| Candidatus_Midichloria_mitochondrii_Iric | Alphaproteobacteria | 0 | 0 | 0 | 0  | 0 |
| Orientia_tsutsugamushi_Boryong_uid616    | Alphaproteobacteria | 0 | 0 | 0 | 0  | 0 |
| Orientia_tsutsugamushi_Ikeda_uid58869    | Alphaproteobacteria | 0 | 0 | 0 | 0  | 0 |
| Rickettsia_bellii_OSU_85_389_uid58681    | Alphaproteobacteria | 0 | 0 | 0 | 0  | 0 |
| Rickettsia_bellii_RML369_C_uid58405      | Alphaproteobacteria | 0 | 0 | 0 | 0  | 0 |
| Rickettsia_canadensis_CA410_uid88063     | Alphaproteobacteria | 0 | 0 | 0 | 3  | 0 |
| Rickettsia_canadensis_McKiel_uid58159    | Alphaproteobacteria | 0 | 0 | 0 | 7  | 0 |
| Candidatus_Rickettsia_amblyommii_GAT     | Alphaproteobacteria | 0 | 0 | 0 | 0  | 0 |
| Rickettsia_africae_ESF_5_uid58799        | Alphaproteobacteria | 0 | 0 | 0 | 0  | 0 |
| Rickettsia_akari_Hartford_uid58161       | Alphaproteobacteria | 0 | 0 | 0 | 12 | 0 |
| Rickettsia_australis_Cutlack_uid158039   | Alphaproteobacteria | 0 | 0 | 0 | 21 | 0 |
| Rickettsia_conorii_Malish_7_uid57633     | Alphaproteobacteria | 0 | 0 | 0 | 0  | 0 |
| Rickettsia_felis_URRWXCal2_uid58331      | Alphaproteobacteria | 0 | 0 | 0 | 0  | 0 |
| Rickettsia_heilongjiangensis_054_uid708  | Alphaproteobacteria | 0 | 0 | 0 | 0  | 0 |
| Rickettsia_japonica_YH_uid73963          | Alphaproteobacteria | 0 | 0 | 0 | 0  | 0 |
| Rickettsia_massiliae_MTU5_uid58801       | Alphaproteobacteria | 0 | 0 | 0 | 11 | 0 |
| Rickettsia_massiliae_AZT80_uid86751      | Alphaproteobacteria | 0 | 0 | 0 | 0  | 0 |
| Rickettsia_montanensis_OSU_85_930_uic    | Alphaproteobacteria | 0 | 0 | 0 | 0  | 0 |
| Rickettsia_parkeri_Portsmouth_uid15804   | Alphaproteobacteria | 0 | 0 | 0 | 0  | 0 |
| Rickettsia_peacockii_Rustic_uid59301     | Alphaproteobacteria | 0 | 0 | 0 | 0  | 0 |
| Rickettsia_philipii_364D_uid89383        | Alphaproteobacteria | 0 | 0 | 0 | 0  | 0 |
| Rickettsia_rhipicephali_3_7_female6_CW   | Alphaproteobacteria | 0 | 0 | 0 | 0  | 0 |
| Rickettsia_rickettsii_Arizona_uid86655   | Alphaproteobacteria | 0 | 0 | 0 | 0  | 0 |
| Rickettsia_rickettsii_Brazil_uid88069    | Alphaproteobacteria | 0 | 0 | 0 | 0  | 0 |
| Rickettsia_rickettsii_Colombia_uid86653  | Alphaproteobacteria | 0 | 0 | 0 | 0  | 0 |
| Rickettsia_rickettsii_Hauke_uid86659     | Alphaproteobacteria | 0 | 0 | 0 | 0  | 0 |
| Rickettsia_rickettsii_Hino_uid86657      | Alphaproteobacteria | 0 | 0 | 0 | 0  | 0 |
| Rickettsia_rickettsii_Hlp_2_uid88067     | Alphaproteobacteria | 0 | 0 | 0 | 0  | 0 |
| Rickettsia_rickettsii_Iowa_uid58961      | Alphaproteobacteria | 0 | 0 | 0 | 0  | 0 |
| Rickettsia_rickettsii_Sheila_Smith_uid5  | Alphaproteobacteria | 0 | 0 | 0 | 0  | 0 |
| Rickettsia_slovaca_13_B_uid82369         | Alphaproteobacteria | 0 | 0 | 0 | 0  | 0 |
| Rickettsia_slovaca_D_CWPP_uid158159      | Alphaproteobacteria | 0 | 0 | 0 | 0  | 0 |

|                                          |                     |   |   |   |   |   |
|------------------------------------------|---------------------|---|---|---|---|---|
| Rickettsia_prowazekii_Breinl_uid196851   | Alphaproteobacteria | 0 | 0 | 0 | 0 | 0 |
| Rickettsia_prowazekii_BuV67_CWPP_uid:    | Alphaproteobacteria | 0 | 0 | 0 | 0 | 0 |
| Rickettsia_prowazekii_Chernikova_uid158  | Alphaproteobacteria | 0 | 0 | 0 | 0 | 0 |
| Rickettsia_prowazekii_Dachau_uid158057   | Alphaproteobacteria | 0 | 0 | 0 | 0 | 0 |
| Rickettsia_prowazekii_GvV257_uid15805    | Alphaproteobacteria | 0 | 0 | 0 | 0 | 0 |
| Rickettsia_prowazekii_Katsinyian_uid158  | Alphaproteobacteria | 0 | 0 | 0 | 0 | 0 |
| Rickettsia_prowazekii_Madrid_E_uid6156   | Alphaproteobacteria | 0 | 0 | 0 | 0 | 0 |
| Rickettsia_prowazekii_NMRC_Madrid_E_     | Alphaproteobacteria | 0 | 0 | 0 | 0 | 0 |
| Rickettsia_prowazekii_Rp22_uid161945     | Alphaproteobacteria | 0 | 0 | 0 | 0 | 0 |
| Rickettsia_prowazekii_RpGvF24_uid1580    | Alphaproteobacteria | 0 | 0 | 0 | 0 | 0 |
| Rickettsia_typhi_B9991CWPP_uid158357     | Alphaproteobacteria | 0 | 0 | 0 | 0 | 0 |
| Rickettsia_typhi_TH1527_uid158161        | Alphaproteobacteria | 0 | 0 | 0 | 0 | 0 |
| Rickettsia_typhi_Wilmington_uid58063     | Alphaproteobacteria | 0 | 0 | 0 | 0 | 0 |
| Erythrobacter_litoralis_HTCC2594_uid58   | Alphaproteobacteria | 0 | 0 | 0 | 0 | 0 |
| Novosphingobium_aromaticivorans_DSM      | Alphaproteobacteria | 0 | 0 | 0 | 0 | 0 |
| Novosphingobium_PP1Y_uid67383            | Alphaproteobacteria | 0 | 0 | 0 | 1 | 0 |
| Sphingobium_chlorophenolicum_L_1_uid     | Alphaproteobacteria | 0 | 0 | 0 | 0 | 0 |
| Sphingobium_japonicum_UT26S_uid4707      | Alphaproteobacteria | 0 | 0 | 0 | 0 | 0 |
| Sphingobium_SYK_6_uid73353               | Alphaproteobacteria | 0 | 0 | 0 | 0 | 0 |
| Sphingomonas_MM_1_uid193771              | Alphaproteobacteria | 1 | 0 | 0 | 0 | 0 |
| Sphingomonas_wittichii_RW1_uid58691      | Alphaproteobacteria | 0 | 0 | 0 | 0 | 0 |
| Sphingopyxis_alaskensis_RB2256_uid583    | Alphaproteobacteria | 0 | 0 | 0 | 0 | 0 |
| Zymomonas_mobilis_ATCC_10988_uid55       | Alphaproteobacteria | 0 | 0 | 0 | 0 | 0 |
| Zymomonas_mobilis_ATCC_29191_uid17       | Alphaproteobacteria | 0 | 0 | 0 | 0 | 0 |
| Zymomonas_mobilis_NCIMB_11163_uid4       | Alphaproteobacteria | 0 | 0 | 0 | 0 | 0 |
| Zymomonas_mobilis_CP4__NRRL_B_14         | Alphaproteobacteria | 0 | 0 | 0 | 0 | 0 |
| Zymomonas_mobilis_ZM4_uid58095           | Alphaproteobacteria | 0 | 0 | 0 | 0 | 0 |
| Zymomonas_mobilis_pomaceae_ATCC_2        | Alphaproteobacteria | 0 | 0 | 0 | 0 | 0 |
| Micavibrio_aeruginosavorus_ARL_13_uid    | Alphaproteobacteria | 0 | 0 | 0 | 0 | 0 |
| Micavibrio_EPB_uid194120                 | Alphaproteobacteria | 0 | 0 | 0 | 0 | 0 |
| Polymorphum_gilvum_SL003B_26A1_uid       | Alphaproteobacteria | 0 | 0 | 0 | 0 | 0 |
| alpha_proteobacterium_HIMB5_uid1757      | Alphaproteobacteria | 0 | 0 | 0 | 0 | 0 |
| alpha_proteobacterium_HIMB59_uid175      | Alphaproteobacteria | 0 | 0 | 0 | 0 | 0 |
| Candidatus_Pelagibacter_IMCC9063_uid6    | Alphaproteobacteria | 0 | 0 | 0 | 0 | 0 |
| Candidatus_Pelagibacter_ubique_HTCC10    | Alphaproteobacteria | 0 | 0 | 0 | 0 | 0 |
| Candidatus_Puniceispirillum_marinum_IN   | Alphaproteobacteria | 1 | 0 | 0 | 0 | 0 |
| Achromobacter_xylooxidans_A8_uid598      | Betaproteobacteria  | 0 | 0 | 0 | 0 | 0 |
| Achromobacter_xylooxidans_NBRC_151       | Betaproteobacteria  | 0 | 0 | 0 | 0 | 0 |
| Achromobacter_xylooxidans_uid205255      | Betaproteobacteria  | 0 | 0 | 0 | 0 | 0 |
| Advenella_kashmirensis_WT001_uid8085     | Betaproteobacteria  | 0 | 0 | 0 | 0 | 0 |
| Bordetella_avium_197N_uid61563           | Betaproteobacteria  | 0 | 0 | 0 | 0 | 0 |
| Bordetella_bronchiseptica_253_uid17891   | Betaproteobacteria  | 0 | 0 | 0 | 1 | 0 |
| Bordetella_bronchiseptica_MO149_uid17    | Betaproteobacteria  | 0 | 0 | 0 | 1 | 0 |
| Bordetella_bronchiseptica_RB50_uid5761   | Betaproteobacteria  | 0 | 0 | 0 | 1 | 0 |
| Bordetella_parapertussis_12822_uid5761   | Betaproteobacteria  | 0 | 0 | 0 | 1 | 0 |
| Bordetella_parapertussis_Bpp5_uid17751   | Betaproteobacteria  | 0 | 0 | 0 | 1 | 0 |
| Bordetella_parapertussis_18323_uid1755   | Betaproteobacteria  | 0 | 0 | 0 | 0 | 0 |
| Bordetella_pertussis_CS_uid158859        | Betaproteobacteria  | 0 | 0 | 0 | 0 | 0 |
| Bordetella_pertussis_Tohama_I_uid5761    | Betaproteobacteria  | 0 | 0 | 0 | 0 | 0 |
| Bordetella_petrii_uid61631               | Betaproteobacteria  | 0 | 0 | 0 | 0 | 0 |
| Pusillimonas_T7_7_uid66391               | Betaproteobacteria  | 0 | 0 | 0 | 0 | 0 |
| Taylorella_asinigenitalis_14_45_uid19719 | Betaproteobacteria  | 0 | 0 | 0 | 0 | 0 |
| Taylorella_asinigenitalis_MCE3_uid73771  | Betaproteobacteria  | 0 | 0 | 0 | 0 | 0 |
| Taylorella_equigenitalis_14_56_uid19719  | Betaproteobacteria  | 0 | 0 | 0 | 0 | 0 |
| Taylorella_equigenitalis_ATCC_35865_uid  | Betaproteobacteria  | 0 | 0 | 0 | 0 | 0 |
| Taylorella_equigenitalis_MCE9_uid62103   | Betaproteobacteria  | 0 | 0 | 0 | 0 | 0 |



|                                                   |                    |   |   |    |    |   |
|---------------------------------------------------|--------------------|---|---|----|----|---|
| Burkholderia_ambifaria_AMMD_uid5830               | Betaproteobacteria | 0 | 0 | 11 | 0  | 0 |
| Burkholderia_ambifaria_MC40_6_uid5871             | Betaproteobacteria | 0 | 0 | 11 | 0  | 0 |
| Burkholderia_cenocepacia_AU_1054_uid5871          | Betaproteobacteria | 0 | 0 | 8  | 0  | 0 |
| Burkholderia_cenocepacia_HI2424_uid5871           | Betaproteobacteria | 0 | 0 | 8  | 0  | 0 |
| Burkholderia_cenocepacia_J2315_uid579             | Betaproteobacteria | 0 | 0 | 0  | 0  | 0 |
| Burkholderia_cenocepacia_MC0_3_uid5871            | Betaproteobacteria | 0 | 0 | 4  | 0  | 0 |
| Burkholderia_cepacia_GG4_uid173858                | Betaproteobacteria | 0 | 0 | 1  | 0  | 0 |
| Burkholderia_383_uid58073                         | Betaproteobacteria | 0 | 0 | 2  | 0  | 0 |
| Burkholderia_multivorans_ATCC_17616_uid5871       | Betaproteobacteria | 0 | 0 | 0  | 0  | 0 |
| Burkholderia_multivorans_ATCC_17616_uid5871       | Betaproteobacteria | 0 | 0 | 0  | 0  | 0 |
| Burkholderia_vietnamiensis_G4_uid58073            | Betaproteobacteria | 0 | 0 | 0  | 0  | 0 |
| Burkholderia_gladioli_BSR3_uid66301               | Betaproteobacteria | 0 | 0 | 0  | 0  | 0 |
| Burkholderia_glumae_BGR1_uid59397                 | Betaproteobacteria | 0 | 0 | 0  | 0  | 0 |
| Burkholderia_phenoliruptrix_BR3459a_uid5871       | Betaproteobacteria | 0 | 0 | 1  | 2  | 0 |
| Burkholderia_phymatum_STM815_uid5871              | Betaproteobacteria | 0 | 0 | 0  | 2  | 0 |
| Burkholderia_phytofirmans_PsJN_uid5871            | Betaproteobacteria | 0 | 0 | 1  | 1  | 0 |
| Burkholderia_rhizoxinica_HKI_454_uid6073          | Betaproteobacteria | 0 | 0 | 1  | 0  | 0 |
| Burkholderia_CCGE1001_uid42975                    | Betaproteobacteria | 0 | 0 | 0  | 2  | 0 |
| Burkholderia_CCGE1002_uid42523                    | Betaproteobacteria | 0 | 0 | 0  | 2  | 0 |
| Burkholderia_CCGE1003_uid46253                    | Betaproteobacteria | 0 | 0 | 0  | 1  | 1 |
| Burkholderia_KJ006_uid165871                      | Betaproteobacteria | 0 | 0 | 0  | 0  | 0 |
| Burkholderia_RPE64_uid205541                      | Betaproteobacteria | 0 | 0 | 0  | 1  | 0 |
| Burkholderia_YI23_uid81081                        | Betaproteobacteria | 0 | 0 | 0  | 1  | 0 |
| Burkholderia_xenovorans_LB400_uid5782             | Betaproteobacteria | 0 | 0 | 0  | 1  | 1 |
| Burkholderia_mallei_ATCC_23344_uid5782            | Betaproteobacteria | 0 | 0 | 0  | 0  | 0 |
| Burkholderia_mallei_NCTC_10229_uid5871            | Betaproteobacteria | 0 | 0 | 0  | 0  | 0 |
| Burkholderia_mallei_NCTC_10247_uid5871            | Betaproteobacteria | 0 | 0 | 0  | 0  | 0 |
| Burkholderia_mallei_SAVP1_uid58387                | Betaproteobacteria | 0 | 0 | 0  | 0  | 0 |
| Burkholderia_pseudomallei_1026b_uid165871         | Betaproteobacteria | 0 | 0 | 0  | 0  | 0 |
| Burkholderia_pseudomallei_1106a_uid5871           | Betaproteobacteria | 0 | 0 | 0  | 0  | 0 |
| Burkholderia_pseudomallei_1710b_uid5871           | Betaproteobacteria | 0 | 0 | 0  | 0  | 0 |
| Burkholderia_pseudomallei_668_uid58387            | Betaproteobacteria | 0 | 0 | 0  | 0  | 0 |
| Burkholderia_pseudomallei_BPC006_uid165871        | Betaproteobacteria | 0 | 0 | 0  | 0  | 0 |
| Burkholderia_pseudomallei_K96243_uid5871          | Betaproteobacteria | 0 | 0 | 0  | 0  | 0 |
| Burkholderia_pseudomallei_MSHR305_uid5871         | Betaproteobacteria | 0 | 0 | 0  | 0  | 0 |
| Burkholderia_pseudomallei_MSHR346_uid5871         | Betaproteobacteria | 0 | 0 | 0  | 0  | 0 |
| Burkholderia_pseudomallei_NCTC_13179_uid5871      | Betaproteobacteria | 0 | 0 | 0  | 0  | 0 |
| Burkholderia_thailandensis_E264_uid58073          | Betaproteobacteria | 0 | 0 | 0  | 0  | 0 |
| Burkholderia_thailandensis_MSMB121_uid5871        | Betaproteobacteria | 0 | 0 | 0  | 0  | 0 |
| Cupriavidus_metallidurans_CH34_uid5782            | Betaproteobacteria | 0 | 0 | 0  | 1  | 0 |
| Cupriavidus_necator_N_1_uid68689                  | Betaproteobacteria | 0 | 0 | 21 | 12 | 0 |
| Ralstonia_eutropha_H16_uid62925                   | Betaproteobacteria | 0 | 0 | 1  | 1  | 0 |
| Ralstonia_eutropha_JMP134_uid58047                | Betaproteobacteria | 0 | 0 | 0  | 1  | 0 |
| Cupriavidus_taiwanensis_LMG_19424_uid5871         | Betaproteobacteria | 0 | 0 | 0  | 1  | 0 |
| Pandoraea_pnomenusa_3kgm_uid229873                | Betaproteobacteria | 0 | 0 | 0  | 1  | 0 |
| Pandoraea_RB_44_uid231151                         | Betaproteobacteria | 0 | 0 | 0  | 1  | 0 |
| Polynucleobacter_necessarius_asymbioticus_uid5871 | Betaproteobacteria | 0 | 0 | 0  | 1  | 0 |
| Polynucleobacter_necessarius_STIR1_uid5871        | Betaproteobacteria | 0 | 0 | 0  | 0  | 0 |
| Ralstonia_pickettii_12D_uid58859                  | Betaproteobacteria | 0 | 0 | 0  | 1  | 1 |
| Ralstonia_pickettii_12J_uid58737                  | Betaproteobacteria | 0 | 0 | 0  | 1  | 1 |
| Ralstonia_solanacearum_CFBP2957_uid5871           | Betaproteobacteria | 0 | 0 | 0  | 1  | 0 |
| Ralstonia_solanacearum_CMR15_uid2277              | Betaproteobacteria | 0 | 0 | 0  | 1  | 0 |
| Ralstonia_solanacearum_FQY_4_f_uid1947            | Betaproteobacteria | 0 | 0 | 0  | 1  | 0 |
| Ralstonia_solanacearum_GMI1000_uid5782            | Betaproteobacteria | 0 | 0 | 0  | 1  | 0 |
| Ralstonia_solanacearum_Po82_uid16213              | Betaproteobacteria | 0 | 0 | 0  | 1  | 0 |
| Ralstonia_solanacearum_PSI07_uid50539             | Betaproteobacteria | 0 | 0 | 0  | 1  | 0 |

|                                              |                    |   |   |    |   |   |
|----------------------------------------------|--------------------|---|---|----|---|---|
| Acidovorax_avenae_ATCC_19860_uid424          | Betaproteobacteria | 1 | 0 | 0  | 1 | 0 |
| Acidovorax_citrulli_AAC00_1_uid58429         | Betaproteobacteria | 0 | 0 | 0  | 1 | 0 |
| Acidovorax_ebreus_TPSY_uid59233              | Betaproteobacteria | 1 | 0 | 0  | 1 | 0 |
| Acidovorax_JS42_uid58427                     | Betaproteobacteria | 0 | 0 | 0  | 1 | 0 |
| Acidovorax_KKS102_uid176500                  | Betaproteobacteria | 0 | 0 | 0  | 1 | 0 |
| Rhodoferrax_ferrireducens_T118_uid5835       | Betaproteobacteria | 0 | 0 | 0  | 1 | 0 |
| Alicyclophilus_denitrificans_BC_uid49953     | Betaproteobacteria | 1 | 0 | 0  | 1 | 0 |
| Alicyclophilus_denitrificans_K601_uid6630    | Betaproteobacteria | 1 | 0 | 0  | 1 | 0 |
| Comamonadaceae_bacterium_CR_uid223           | Betaproteobacteria | 0 | 0 | 1  | 6 | 1 |
| Comamonas_testosteroni_CNB_2_uid629          | Betaproteobacteria | 0 | 0 | 0  | 1 | 0 |
| Delftia_acidovorans_SPH_1_uid58703           | Betaproteobacteria | 0 | 0 | 0  | 1 | 0 |
| Delftia_Cs1_4_uid67319                       | Betaproteobacteria | 0 | 0 | 0  | 1 | 0 |
| Polaromonas_naphthalenivorans_CJ2_uid629     | Betaproteobacteria | 0 | 5 | 16 | 2 | 2 |
| Polaromonas_JS666_uid58207                   | Betaproteobacteria | 0 | 3 | 1  | 1 | 0 |
| Ramlibacter_tataouinensis_TTB310_uid629      | Betaproteobacteria | 0 | 0 | 0  | 1 | 0 |
| Variovorax_paradoxus_B4_uid218005            | Betaproteobacteria | 0 | 0 | 0  | 1 | 1 |
| Variovorax_paradoxus_EPS_uid62107            | Betaproteobacteria | 0 | 0 | 0  | 1 | 0 |
| Variovorax_paradoxus_S110_uid59437           | Betaproteobacteria | 0 | 0 | 0  | 1 | 0 |
| Verminephrobacter_eiseniae_EF01_2_uid629     | Betaproteobacteria | 1 | 0 | 0  | 1 | 0 |
| Candidatus_Zinderia_insecticola_CARI_uid629  | Betaproteobacteria | 0 | 0 | 0  | 0 | 0 |
| Collimonas_fungivorans_Ter331_uid7079        | Betaproteobacteria | 0 | 0 | 0  | 2 | 0 |
| Herbaspirillum_seropedicae_SmR1_uid50        | Betaproteobacteria | 0 | 0 | 0  | 1 | 1 |
| Herminiimonas_arsenicoxydans_uid5829         | Betaproteobacteria | 0 | 0 | 0  | 1 | 0 |
| Janthinobacterium_Marseille_uid58603         | Betaproteobacteria | 0 | 0 | 0  | 1 | 0 |
| Leptothrix_cholodnii_SP_6_uid58971           | Betaproteobacteria | 0 | 0 | 0  | 1 | 1 |
| Methylobium_petroleiphilum_PM1_uid58         | Betaproteobacteria | 0 | 0 | 0  | 1 | 0 |
| Rubrivivax_gelatinosus_IL144_uid158163       | Betaproteobacteria | 0 | 0 | 0  | 0 | 1 |
| Thiomonas_3As_uid178369                      | Betaproteobacteria | 0 | 0 | 2  | 0 | 0 |
| Thiomonas_intermedia_K12_uid48825            | Betaproteobacteria | 0 | 0 | 5  | 1 | 0 |
| Gallionella_capsiferriformans_ES_2_uid58     | Betaproteobacteria | 0 | 0 | 0  | 1 | 0 |
| Sideroxydans_lithotrophicus_ES_1_uid46       | Betaproteobacteria | 0 | 0 | 0  | 1 | 0 |
| Sulfuricella_denitrificans_skB26_uid1702     | Betaproteobacteria | 0 | 0 | 0  | 0 | 0 |
| Thiobacillus_denitrificans_ATCC_25259_uid629 | Betaproteobacteria | 0 | 0 | 0  | 2 | 0 |
| Methylobacillus_flagellatus_KT_uid58049      | Betaproteobacteria | 0 | 0 | 0  | 1 | 0 |
| Methylothenera_mobilis_JLW8_uid59373         | Betaproteobacteria | 0 | 0 | 0  | 0 | 0 |
| Methylothenera_301_uid49469                  | Betaproteobacteria | 0 | 0 | 0  | 2 | 0 |
| Methylovorus_glucosetrophus_SIP3_4_uid629    | Betaproteobacteria | 0 | 0 | 0  | 0 | 0 |
| Methylovorus_MP688_uid60723                  | Betaproteobacteria | 0 | 0 | 0  | 0 | 0 |
| Chromobacterium_violaceum_ATCC_12416         | Betaproteobacteria | 0 | 0 | 0  | 1 | 0 |
| Laribacter_hongkongensis_HLHK9_uid592        | Betaproteobacteria | 0 | 0 | 0  | 0 | 0 |
| Neisseria_gonorrhoeae_FA_1090_uid576         | Betaproteobacteria | 0 | 0 | 0  | 1 | 0 |
| Neisseria_gonorrhoeae_NCCP11945_uid58        | Betaproteobacteria | 0 | 0 | 0  | 1 | 0 |
| Neisseria_gonorrhoeae_TCDC_NG08107_uid629    | Betaproteobacteria | 0 | 0 | 0  | 1 | 0 |
| Neisseria_lactamica_020_06_uid60851          | Betaproteobacteria | 1 | 0 | 0  | 1 | 0 |
| Neisseria_meningitidis_alpha14_uid6164       | Betaproteobacteria | 1 | 0 | 0  | 1 | 0 |
| Neisseria_meningitidis_G2136_uid16208        | Betaproteobacteria | 0 | 0 | 0  | 4 | 0 |
| Neisseria_meningitidis_M01_240149_uid629     | Betaproteobacteria | 0 | 0 | 0  | 4 | 0 |
| Neisseria_meningitidis_M01_240355_uid629     | Betaproteobacteria | 0 | 0 | 1  | 3 | 0 |
| Neisseria_meningitidis_M04_240196_uid629     | Betaproteobacteria | 0 | 0 | 0  | 2 | 0 |
| Neisseria_meningitidis_NZ_05_33_uid162       | Betaproteobacteria | 0 | 0 | 0  | 4 | 0 |
| Neisseria_meningitidis_Z2491_uid57819        | Betaproteobacteria | 1 | 0 | 0  | 2 | 0 |
| Neisseria_meningitidis_alpha710_uid161       | Betaproteobacteria | 0 | 0 | 0  | 4 | 0 |
| Neisseria_meningitidis_H44_76_uid16208       | Betaproteobacteria | 0 | 0 | 0  | 1 | 0 |
| Neisseria_meningitidis_MC58_uid57817         | Betaproteobacteria | 0 | 0 | 0  | 1 | 0 |
| Neisseria_meningitidis_053442_uid58587       | Betaproteobacteria | 1 | 0 | 0  | 2 | 0 |
| Neisseria_meningitidis_8013_uid161967        | Betaproteobacteria | 1 | 0 | 0  | 4 | 0 |

|                                                   |                       |   |   |   |    |   |
|---------------------------------------------------|-----------------------|---|---|---|----|---|
| Neisseria_meningitidis_FAM18_uid57825             | Betaproteobacteria    | 0 | 0 | 0 | 3  | 0 |
| Neisseria_meningitidis_WUE_2594_uid16             | Betaproteobacteria    | 1 | 0 | 0 | 4  | 0 |
| Pseudogulbenkiana_NH8B_uid73423                   | Betaproteobacteria    | 0 | 0 | 0 | 0  | 0 |
| Nitrosomonas_europaea_ATCC_19718_uid              | Betaproteobacteria    | 0 | 0 | 0 | 1  | 0 |
| Nitrosomonas_eutropha_C91_uid58363                | Betaproteobacteria    | 0 | 0 | 0 | 0  | 0 |
| Nitrosomonas_AL212_uid55727                       | Betaproteobacteria    | 1 | 0 | 0 | 8  | 0 |
| Nitrosomonas_Is79A3_uid68745                      | Betaproteobacteria    | 0 | 0 | 0 | 5  | 0 |
| Nitrospira_multiformis_ATCC_25196_uid             | Betaproteobacteria    | 0 | 0 | 0 | 0  | 0 |
| Aromatoleum_aromaticum_EbN1_uid582                | Betaproteobacteria    | 0 | 0 | 2 | 8  | 0 |
| Azoarcus_BH72_uid61603                            | Betaproteobacteria    | 0 | 0 | 0 | 0  | 0 |
| Azoarcus_KH32C_uid193704                          | Betaproteobacteria    | 0 | 0 | 0 | 0  | 1 |
| Dechlorosoma_suillum_PS_uid81439                  | Betaproteobacteria    | 0 | 0 | 0 | 0  | 0 |
| Dechloromonas_aromatica_RCB_uid5802               | Betaproteobacteria    | 0 | 0 | 0 | 0  | 0 |
| Thauera_MZ1T_uid58987                             | Betaproteobacteria    | 0 | 0 | 0 | 1  | 0 |
| Candidatus_Accumulibacter_phosphatis_uid          | Betaproteobacteria    | 0 | 0 | 0 | 4  | 0 |
| Candidatus_Nasuia_deltacephalinicola_N_uid        | Betaproteobacteria    | 0 | 0 | 0 | 0  | 0 |
| Candidatus_syncytium_symbiont_of_Diaphorina_citri | Betaproteobacteria    | 0 | 0 | 0 | 0  | 0 |
| Candidatus_Tremblaya_phenacola_PAVE_uid           | Betaproteobacteria    | 0 | 0 | 0 | 0  | 0 |
| Candidatus_Tremblaya_princeps_PCIT_uid            | Betaproteobacteria    | 0 | 0 | 0 | 0  | 0 |
| Candidatus_Tremblaya_princeps_PCVAL_uid           | Betaproteobacteria    | 0 | 0 | 0 | 0  | 0 |
| Candidatus_Kinetoplastibacterium_crithic          | Betaproteobacteria    | 0 | 0 | 0 | 0  | 0 |
| Candidatus_Kinetoplastibacterium_crithic          | Betaproteobacteria    | 0 | 0 | 0 | 0  | 0 |
| Candidatus_Kinetoplastibacterium_desou            | Betaproteobacteria    | 0 | 0 | 0 | 0  | 0 |
| Candidatus_Kinetoplastibacterium_galatii          | Betaproteobacteria    | 0 | 0 | 0 | 0  | 0 |
| Candidatus_Kinetoplastibacterium_oncop            | Betaproteobacteria    | 0 | 0 | 0 | 0  | 0 |
| Candidatus_Kinetoplastibacterium_blasto           | Betaproteobacteria    | 0 | 0 | 0 | 0  | 0 |
| Candidatus_Kinetoplastibacterium_blasto           | Betaproteobacteria    | 0 | 0 | 0 | 0  | 0 |
| beta_proteobacterium_CB_uid191340                 | Betaproteobacteria    | 0 | 0 | 0 | 1  | 0 |
| Bacteriovorax_marinus_SJ_uid82341                 | delta/epsilon subdivi | 0 | 0 | 0 | 1  | 1 |
| Bdellovibrio_bacteriovorus_HD100_uid61            | delta/epsilon subdivi | 0 | 0 | 0 | 3  | 0 |
| Bdellovibrio_bacteriovorus_Tiberius_uid1          | delta/epsilon subdivi | 0 | 0 | 0 | 1  | 0 |
| Bdellovibrio_exovorus_JSS_uid194119               | delta/epsilon subdivi | 1 | 0 | 0 | 2  | 0 |
| Desulfarculus_baarsii_DSM_2075_uid513             | delta/epsilon subdivi | 0 | 0 | 0 | 0  | 0 |
| Desulfatibacillum_alkenivorans_AK_01_uid          | delta/epsilon subdivi | 0 | 0 | 0 | 13 | 0 |
| Desulfobacterium_autotrophicum_HRM2               | delta/epsilon subdivi | 0 | 0 | 1 | 3  | 0 |
| Desulfobacula_toluolica_Tol2_uid175777            | delta/epsilon subdivi | 0 | 0 | 0 | 1  | 0 |
| Desulfococcus_oleovorans_Hxd3_uid587              | delta/epsilon subdivi | 0 | 0 | 0 | 4  | 0 |
| Desulfobulbus_propionicus_DSM_2032_uid            | delta/epsilon subdivi | 0 | 0 | 0 | 5  | 0 |
| Desulfocapsa_sulfexigens_DSM_10523_uid            | delta/epsilon subdivi | 0 | 0 | 0 | 3  | 0 |
| Desulfotalea_psychrophila_Lsv54_uid581            | delta/epsilon subdivi | 0 | 0 | 0 | 0  | 0 |
| Desulfurivibrio_alkaliphilus_AHT2_uid494          | delta/epsilon subdivi | 0 | 0 | 0 | 2  | 0 |
| Desulfohalobium_retbaense_DSM_5692_uid            | delta/epsilon subdivi | 0 | 0 | 0 | 2  | 0 |
| Desulfomicrobium_baculatum_DSM_402_uid            | delta/epsilon subdivi | 0 | 0 | 0 | 2  | 0 |
| Desulfovibrio_aespoeensis_Aspo_2_uid42            | delta/epsilon subdivi | 0 | 0 | 0 | 0  | 0 |
| Desulfovibrio_africanus_Walvis_Bay_uid6           | delta/epsilon subdivi | 0 | 0 | 0 | 0  | 0 |
| Desulfovibrio_alaskensis_G20_uid57941             | delta/epsilon subdivi | 0 | 0 | 0 | 1  | 0 |
| Desulfovibrio_desulfuricans_ND132_uid6            | delta/epsilon subdivi | 0 | 0 | 0 | 0  | 0 |
| Desulfovibrio_desulfuricans_ATCC_27774            | delta/epsilon subdivi | 0 | 0 | 0 | 0  | 0 |
| Desulfovibrio_gigas_DSM_1382_uid2212              | delta/epsilon subdivi | 0 | 0 | 0 | 0  | 0 |
| Desulfovibrio_hydrothermalis_AM13_uid             | delta/epsilon subdivi | 0 | 0 | 0 | 0  | 0 |
| Desulfovibrio_magneticus_RS_1_uid5930             | delta/epsilon subdivi | 0 | 0 | 0 | 2  | 0 |
| Desulfovibrio_piezophilus_C1TLV30_uid1            | delta/epsilon subdivi | 0 | 0 | 0 | 4  | 0 |
| Desulfovibrio_salexigens_DSM_2638_uid             | delta/epsilon subdivi | 0 | 0 | 0 | 0  | 0 |
| Desulfovibrio_vulgaris_DP4_uid58679               | delta/epsilon subdivi | 0 | 0 | 1 | 0  | 0 |
| Desulfovibrio_vulgaris_RCH1_uid161961             | delta/epsilon subdivi | 0 | 0 | 1 | 0  | 0 |
| Desulfovibrio_vulgaris_Hildenborough_uid          | delta/epsilon subdivi | 0 | 0 | 1 | 0  | 0 |

|                                          |                    |   |   |   |    |   |
|------------------------------------------|--------------------|---|---|---|----|---|
| Desulfovibrio_vulgaris__Miyazaki_F__uid: | delta/epsilon subd | 0 | 0 | 0 | 0  | 0 |
| Lawsonia_intracellularis_N343_uid18659:  | delta/epsilon subd | 0 | 0 | 0 | 0  | 0 |
| Lawsonia_intracellularis_PHE_MN1_00_u    | delta/epsilon subd | 0 | 0 | 0 | 0  | 0 |
| Hippea_maritima_DSM_10411_uid65267       | delta/epsilon subd | 0 | 0 | 1 | 4  | 0 |
| Geobacter_bemidjiensis_Bem_uid58749      | delta/epsilon subd | 0 | 0 | 0 | 5  | 0 |
| Geobacter_FRC_32_uid58543                | delta/epsilon subd | 0 | 0 | 0 | 6  | 0 |
| Geobacter_lovleyi_SZ_uid58713            | delta/epsilon subd | 0 | 0 | 0 | 1  | 0 |
| Geobacter_metallireducens_GS_15_uid5:    | delta/epsilon subd | 0 | 0 | 0 | 1  | 0 |
| Geobacter_M18_uid55771                   | delta/epsilon subd | 0 | 0 | 0 | 3  | 0 |
| Geobacter_M21_uid59037                   | delta/epsilon subd | 0 | 0 | 0 | 3  | 0 |
| Geobacter_sulfurreducens_KN400_uid16:    | delta/epsilon subd | 0 | 0 | 0 | 5  | 0 |
| Geobacter_sulfurreducens_PCA_uid5774:    | delta/epsilon subd | 0 | 0 | 0 | 5  | 0 |
| Geobacter_uraniireducens_Rf4_uid58475    | delta/epsilon subd | 0 | 0 | 0 | 14 | 0 |
| Pelobacter_carbinolicus_DSM_2380_uid5    | delta/epsilon subd | 0 | 0 | 0 | 6  | 0 |
| Pelobacter_propionicus_DSM_2379_uid5     | delta/epsilon subd | 0 | 0 | 1 | 3  | 0 |
| Stigmatella_aurantiaca_DW4_3_1_uid15:    | delta/epsilon subd | 0 | 0 | 0 | 0  | 0 |
| Anaeromyxobacter_dehalogenans_2CP_1      | delta/epsilon subd | 0 | 0 | 0 | 6  | 0 |
| Anaeromyxobacter_dehalogenans_2CP_C      | delta/epsilon subd | 0 | 0 | 0 | 5  | 0 |
| Anaeromyxobacter_Fw109_5_uid58755        | delta/epsilon subd | 0 | 0 | 1 | 4  | 0 |
| Anaeromyxobacter_K_uid58953              | delta/epsilon subd | 0 | 0 | 0 | 4  | 0 |
| Coralloccoccus_coralloides_DSM_2259_uir  | delta/epsilon subd | 0 | 0 | 0 | 0  | 0 |
| Myxococcus_fulvus_HW_1_uid68443          | delta/epsilon subd | 0 | 0 | 1 | 0  | 2 |
| Myxococcus_stipitatus_DSM_14675_uid1     | delta/epsilon subd | 0 | 0 | 0 | 0  | 0 |
| Myxococcus_xanthus_DK_1622_uid5800:      | delta/epsilon subd | 0 | 0 | 0 | 0  | 2 |
| Haliangium_ochraceum_DSM_14365_uid       | delta/epsilon subd | 0 | 0 | 0 | 1  | 0 |
| Sorangium_cellulosum__So_ce_56__uid6     | delta/epsilon subd | 0 | 0 | 0 | 1  | 0 |
| Sorangium_cellulosum_So0157_2_uid210     | delta/epsilon subd | 0 | 0 | 0 | 1  | 0 |
| Desulfobacca_acetoxidans_DSM_11109_u     | delta/epsilon subd | 0 | 0 | 0 | 4  | 3 |
| Desulfomonile_tiedjei_DSM_6799_uid16:    | delta/epsilon subd | 0 | 0 | 0 | 5  | 0 |
| Syntrophus_aciditrophicus_SB_uid58539    | delta/epsilon subd | 0 | 0 | 0 | 0  | 0 |
| Syntrophobacter_fumaroxidans_MPOB_u      | delta/epsilon subd | 0 | 0 | 0 | 1  | 1 |
| delta_proteobacterium_BABL1_uid23071     | delta/epsilon subd | 0 | 0 | 1 | 0  | 0 |
| Arcobacter_butzleri_7h1h_uid200766       | delta/epsilon subd | 0 | 0 | 0 | 0  | 0 |
| Arcobacter_butzleri_ED_1_uid158699       | delta/epsilon subd | 0 | 0 | 0 | 0  | 0 |
| Arcobacter_butzleri_RM4018_uid58557      | delta/epsilon subd | 0 | 0 | 0 | 0  | 0 |
| Arcobacter_nitrofigilis_DSM_7299_uid49   | delta/epsilon subd | 0 | 0 | 0 | 1  | 0 |
| Arcobacter_L_uid158135                   | delta/epsilon subd | 0 | 0 | 0 | 0  | 0 |
| Campylobacter_coli_15_537360_uid2261     | delta/epsilon subd | 0 | 0 | 0 | 0  | 0 |
| Campylobacter_coli_76339_uid217050       | delta/epsilon subd | 0 | 0 | 0 | 0  | 0 |
| Campylobacter_coli_CVM_N29710_uid21      | delta/epsilon subd | 0 | 0 | 1 | 0  | 0 |
| Campylobacter_concisus_13826_uid5866     | delta/epsilon subd | 0 | 0 | 0 | 0  | 0 |
| Campylobacter_curvus_525_92_uid5866:     | delta/epsilon subd | 0 | 0 | 0 | 0  | 0 |
| Campylobacter_fetus_82_40_uid58545       | delta/epsilon subd | 0 | 0 | 0 | 0  | 0 |
| Campylobacter_hominis_ATCC_BAA_381_      | delta/epsilon subd | 0 | 0 | 0 | 0  | 0 |
| Campylobacter_jejuni_4031_uid222817      | delta/epsilon subd | 1 | 0 | 0 | 0  | 0 |
| Campylobacter_jejuni_RM1221_uid5789:     | delta/epsilon subd | 0 | 0 | 0 | 0  | 0 |
| Campylobacter_jejuni_doylei_269_97_uic   | delta/epsilon subd | 1 | 0 | 3 | 0  | 0 |
| Campylobacter_jejuni_00_2425_uid2193:    | delta/epsilon subd | 1 | 0 | 1 | 0  | 0 |
| Campylobacter_jejuni_00_2426_uid2193:    | delta/epsilon subd | 1 | 0 | 1 | 0  | 0 |
| Campylobacter_jejuni_00_2538_uid2193:    | delta/epsilon subd | 1 | 0 | 1 | 0  | 0 |
| Campylobacter_jejuni_00_2544_uid2193:    | delta/epsilon subd | 1 | 0 | 2 | 0  | 1 |
| Campylobacter_jejuni_81116_uid58771      | delta/epsilon subd | 1 | 0 | 0 | 0  | 0 |
| Campylobacter_jejuni_81_176_uid58503     | delta/epsilon subd | 0 | 0 | 0 | 0  | 0 |
| Campylobacter_jejuni_IA3902_uid159531    | delta/epsilon subd | 1 | 0 | 0 | 0  | 0 |
| Campylobacter_jejuni_ICDCCJ07001_uid6    | delta/epsilon subd | 0 | 0 | 1 | 0  | 0 |
| Campylobacter_jejuni_M1_uid159535        | delta/epsilon subd | 1 | 0 | 0 | 0  | 0 |

|                                          |                       |   |   |    |    |   |
|------------------------------------------|-----------------------|---|---|----|----|---|
| Campylobacter_jejuni_NCTC_11168__A1      | delta/epsilon subdivi | 1 | 0 | 0  | 0  | 0 |
| Campylobacter_jejuni_NCTC_11168_BN1      | delta/epsilon subdivi | 1 | 0 | 0  | 0  | 0 |
| Campylobacter_jejuni_PT14_uid176499      | delta/epsilon subdivi | 1 | 0 | 1  | 0  | 0 |
| Campylobacter_jejuni_S3_uid159533        | delta/epsilon subdivi | 0 | 0 | 1  | 0  | 0 |
| Campylobacter_lari_RM2100_uid58115       | delta/epsilon subdivi | 0 | 0 | 0  | 0  | 0 |
| Campylobacter_03_427_uid226993           | delta/epsilon subdivi | 0 | 0 | 0  | 0  | 0 |
| Sulfurospirillum_barnesii_SES_3_uid1681  | delta/epsilon subdivi | 0 | 0 | 0  | 2  | 0 |
| Sulfurospirillum_deleyianum_DSM_6946     | delta/epsilon subdivi | 0 | 0 | 0  | 1  | 0 |
| Helicobacter_acinonychis_Sheeba_uid586   | delta/epsilon subdivi | 0 | 0 | 2  | 4  | 0 |
| Helicobacter_bizzozeronii_CIII_1_uid6814 | delta/epsilon subdivi | 0 | 0 | 5  | 2  | 3 |
| Helicobacter_cetorum_MIT_00_7128_uid     | delta/epsilon subdivi | 0 | 0 | 0  | 0  | 0 |
| Helicobacter_cetorum_MIT_99_5656_uid     | delta/epsilon subdivi | 0 | 0 | 24 | 23 | 0 |
| Helicobacter_cinaedi_ATCC_BAA_847_uic    | delta/epsilon subdivi | 1 | 0 | 0  | 0  | 0 |
| Helicobacter_cinaedi_PAGU611_uid1622     | delta/epsilon subdivi | 1 | 0 | 0  | 0  | 0 |
| Helicobacter_felis_ATCC_49179_uid6140    | delta/epsilon subdivi | 0 | 0 | 3  | 0  | 1 |
| Helicobacter_heimannii_ASB1_4_uid182     | delta/epsilon subdivi | 0 | 0 | 12 | 4  | 1 |
| Helicobacter_hepaticus_ATCC_51449_uid    | delta/epsilon subdivi | 0 | 0 | 0  | 0  | 0 |
| Helicobacter_mustelae_12198_uid46647     | delta/epsilon subdivi | 1 | 0 | 0  | 0  | 0 |
| Helicobacter_pylori_26695_uid178201      | delta/epsilon subdivi | 0 | 0 | 7  | 7  | 0 |
| Helicobacter_pylori_26695_uid57787       | delta/epsilon subdivi | 0 | 0 | 5  | 7  | 0 |
| Helicobacter_pylori_35A_uid49903         | delta/epsilon subdivi | 0 | 0 | 1  | 0  | 0 |
| Helicobacter_pylori_51_uid161925         | delta/epsilon subdivi | 0 | 0 | 1  | 0  | 1 |
| Helicobacter_pylori_uid159983            | delta/epsilon subdivi | 0 | 0 | 0  | 0  | 0 |
| Helicobacter_pylori_83_uid161153         | delta/epsilon subdivi | 0 | 0 | 2  | 1  | 0 |
| Helicobacter_pylori_908_uid159985        | delta/epsilon subdivi | 0 | 0 | 2  | 1  | 0 |
| Helicobacter_pylori_2017_uid161151       | delta/epsilon subdivi | 0 | 0 | 2  | 1  | 0 |
| Helicobacter_pylori_2018_uid161159       | delta/epsilon subdivi | 0 | 0 | 2  | 1  | 0 |
| Helicobacter_pylori_Aklavik117_uid1822   | delta/epsilon subdivi | 0 | 0 | 2  | 0  | 1 |
| Helicobacter_pylori_Aklavik86_uid18220   | delta/epsilon subdivi | 0 | 0 | 1  | 0  | 0 |
| Helicobacter_pylori_B38_uid59415         | delta/epsilon subdivi | 0 | 0 | 5  | 0  | 5 |
| Helicobacter_pylori_B8_uid49873          | delta/epsilon subdivi | 0 | 0 | 1  | 0  | 0 |
| Helicobacter_pylori_BM012A_uid229744     | delta/epsilon subdivi | 0 | 0 | 9  | 1  | 9 |
| Helicobacter_pylori_BM012S_uid229881     | delta/epsilon subdivi | 0 | 0 | 9  | 1  | 9 |
| Helicobacter_pylori_Cuz20_uid159987      | delta/epsilon subdivi | 0 | 0 | 4  | 1  | 1 |
| Helicobacter_pylori_ELS37_uid158157      | delta/epsilon subdivi | 0 | 0 | 9  | 7  | 1 |
| Helicobacter_pylori_F16_uid161145        | delta/epsilon subdivi | 0 | 0 | 3  | 0  | 2 |
| Helicobacter_pylori_F30_uid159991        | delta/epsilon subdivi | 0 | 0 | 1  | 0  | 0 |
| Helicobacter_pylori_F32_uid161139        | delta/epsilon subdivi | 0 | 0 | 2  | 1  | 0 |
| Helicobacter_pylori_F57_uid161143        | delta/epsilon subdivi | 0 | 0 | 1  | 0  | 0 |
| Helicobacter_pylori_G27_uid59305         | delta/epsilon subdivi | 0 | 0 | 0  | 0  | 0 |
| Helicobacter_pylori_Gambia94_24_uid15    | delta/epsilon subdivi | 0 | 0 | 0  | 0  | 0 |
| Helicobacter_pylori_HPAG1_uid58517       | delta/epsilon subdivi | 0 | 0 | 3  | 0  | 1 |
| Helicobacter_pylori_HUP_B14_uid162213    | delta/epsilon subdivi | 0 | 0 | 2  | 1  | 1 |
| Helicobacter_pylori_India7_uid161149     | delta/epsilon subdivi | 0 | 0 | 0  | 0  | 0 |
| Helicobacter_pylori_J99_uid57789         | delta/epsilon subdivi | 0 | 0 | 1  | 1  | 0 |
| Helicobacter_pylori_Lithuania75_uid1594  | delta/epsilon subdivi | 0 | 0 | 0  | 0  | 0 |
| Helicobacter_pylori_OK113_uid193715      | delta/epsilon subdivi | 0 | 0 | 2  | 0  | 1 |
| Helicobacter_pylori_OK310_uid193716      | delta/epsilon subdivi | 0 | 0 | 0  | 0  | 0 |
| Helicobacter_pylori_P12_uid59327         | delta/epsilon subdivi | 0 | 0 | 1  | 0  | 0 |
| Helicobacter_pylori_PeCan18_uid162211    | delta/epsilon subdivi | 0 | 0 | 2  | 2  | 0 |
| Helicobacter_pylori_PeCan4_uid53539      | delta/epsilon subdivi | 0 | 0 | 2  | 1  | 0 |
| Helicobacter_pylori_Puno120_uid159611    | delta/epsilon subdivi | 0 | 0 | 1  | 0  | 0 |
| Helicobacter_pylori_Puno135_uid161157    | delta/epsilon subdivi | 0 | 0 | 0  | 0  | 0 |
| Helicobacter_pylori_Rif1_uid178202       | delta/epsilon subdivi | 0 | 0 | 7  | 7  | 0 |
| Helicobacter_pylori_Rif2_uid178203       | delta/epsilon subdivi | 0 | 0 | 7  | 7  | 0 |
| Helicobacter_pylori_Sat464_uid159467     | delta/epsilon subdivi | 0 | 0 | 2  | 0  | 1 |

|                                          |                       |   |   |   |   |   |
|------------------------------------------|-----------------------|---|---|---|---|---|
| Helicobacter_pylori_Shi112_uid162207     | delta/epsilon subdivi | 0 | 0 | 7 | 2 | 5 |
| Helicobacter_pylori_Shi169_uid162209     | delta/epsilon subdivi | 0 | 0 | 8 | 0 | 6 |
| Helicobacter_pylori_Shi417_uid162205     | delta/epsilon subdivi | 0 | 0 | 2 | 0 | 0 |
| Helicobacter_pylori_Shi470_uid59165      | delta/epsilon subdivi | 0 | 0 | 0 | 0 | 0 |
| Helicobacter_pylori_SJM180_uid53541      | delta/epsilon subdivi | 0 | 0 | 1 | 0 | 0 |
| Helicobacter_pylori_SNT49_uid159615      | delta/epsilon subdivi | 0 | 0 | 0 | 0 | 0 |
| Helicobacter_pylori_SouthAfrica20_uid21  | delta/epsilon subdivi | 0 | 0 | 0 | 0 | 0 |
| Helicobacter_pylori_SouthAfrica7_uid159  | delta/epsilon subdivi | 0 | 0 | 5 | 5 | 0 |
| Helicobacter_pylori_UM032_uid203025      | delta/epsilon subdivi | 0 | 0 | 1 | 0 | 0 |
| Helicobacter_pylori_UM037_uid203027      | delta/epsilon subdivi | 0 | 0 | 5 | 0 | 0 |
| Helicobacter_pylori_UM066_uid203028      | delta/epsilon subdivi | 0 | 0 | 0 | 0 | 0 |
| Helicobacter_pylori_UM298_uid213226      | delta/epsilon subdivi | 0 | 0 | 1 | 0 | 0 |
| Helicobacter_pylori_UM299_uid203026      | delta/epsilon subdivi | 0 | 0 | 1 | 0 | 0 |
| Helicobacter_pylori_v225d_uid159639      | delta/epsilon subdivi | 0 | 0 | 0 | 1 | 0 |
| Helicobacter_pylori_XZ274_uid165869      | delta/epsilon subdivi | 0 | 0 | 4 | 0 | 3 |
| uncultured_Sulfuricurvum_RIFRC_1_uid1    | delta/epsilon subdivi | 0 | 0 | 0 | 2 | 0 |
| Sulfuricurvum_kujiense_DSM_16994_uid     | delta/epsilon subdivi | 0 | 0 | 0 | 3 | 0 |
| Sulfurimonas_autotrophica_DSM_16294_     | delta/epsilon subdivi | 0 | 0 | 0 | 1 | 0 |
| Sulfurimonas_denitrificans_DSM_1251_     | delta/epsilon subdivi | 0 | 0 | 0 | 5 | 0 |
| Wolinella_succinogenes_DSM_1740_uid6     | delta/epsilon subdivi | 2 | 0 | 0 | 0 | 0 |
| Nitratifactor_salsuginis_DSM_16511_      | delta/epsilon subdivi | 1 | 0 | 0 | 9 | 0 |
| Nautilia_profundicola_AmH_uid59345       | delta/epsilon subdivi | 0 | 0 | 0 | 1 | 0 |
| Nitratiruptor_SB155_2_uid58861           | delta/epsilon subdivi | 0 | 0 | 0 | 0 | 0 |
| Sulfurovum_NBC37_1_uid58863              | delta/epsilon subdivi | 0 | 0 | 0 | 8 | 0 |
| Acidithiobacillus_caldus_SM_1_uid70791   | Gammaproteobacter     | 0 | 3 | 5 | 1 | 0 |
| Acidithiobacillus_ferrivorans_SS3_uid673 | Gammaproteobacter     | 0 | 2 | 1 | 0 | 0 |
| Acidithiobacillus_ferroxidans_ATCC_232   | Gammaproteobacter     | 0 | 2 | 6 | 0 | 5 |
| Acidithiobacillus_ferroxidans_ATCC_539   | Gammaproteobacter     | 0 | 0 | 0 | 0 | 0 |
| Aeromonas_hydrophila_ML09_119_uid2       | Gammaproteobacter     | 0 | 0 | 0 | 1 | 0 |
| Aeromonas_hydrophila_ATCC_7966_uid5      | Gammaproteobacter     | 0 | 0 | 0 | 0 | 0 |
| Aeromonas_salmonicida_A449_uid58631      | Gammaproteobacter     | 0 | 0 | 0 | 1 | 0 |
| Aeromonas_veronii_B565_uid66323          | Gammaproteobacter     | 0 | 0 | 0 | 0 | 0 |
| Oceanimonas_GK1_uid81627                 | Gammaproteobacter     | 0 | 0 | 0 | 1 | 0 |
| Tolumonas_auensis_DSM_9187_uid5939       | Gammaproteobacter     | 0 | 0 | 0 | 0 | 0 |
| Alteromonas_macleodii_AltDE1_uid1790     | Gammaproteobacter     | 0 | 0 | 0 | 0 | 0 |
| Alteromonas_macleodii_ATCC_27126_        | Gammaproteobacter     | 0 | 0 | 0 | 1 | 0 |
| Alteromonas_macleodii_Aegean_Sea_M       | Gammaproteobacter     | 0 | 0 | 0 | 0 | 0 |
| Alteromonas_macleodii_Balearic_Sea_A     | Gammaproteobacter     | 0 | 0 | 0 | 1 | 0 |
| Alteromonas_macleodii_Black_Sea_11_      | Gammaproteobacter     | 0 | 0 | 0 | 1 | 0 |
| Alteromonas_macleodii_Deep_ecotype_      | Gammaproteobacter     | 0 | 0 | 0 | 0 | 0 |
| Alteromonas_macleodii_English_Channe     | Gammaproteobacter     | 0 | 0 | 0 | 0 | 0 |
| Alteromonas_macleodii_English_Channe     | Gammaproteobacter     | 0 | 0 | 0 | 1 | 0 |
| Alteromonas_macleodii_Ionian_Sea_U4_     | Gammaproteobacter     | 0 | 0 | 1 | 0 | 0 |
| Alteromonas_macleodii_Ionian_Sea_U7_     | Gammaproteobacter     | 0 | 0 | 1 | 0 | 0 |
| Alteromonas_macleodii_Ionian_Sea_U8_     | Gammaproteobacter     | 0 | 0 | 1 | 0 | 0 |
| Alteromonas_macleodii_Ionian_Sea_UM      | Gammaproteobacter     | 0 | 0 | 0 | 0 | 0 |
| Alteromonas_macleodii_Ionian_Sea_UM      | Gammaproteobacter     | 0 | 0 | 0 | 0 | 0 |
| Alteromonas_SN2_uid67349                 | Gammaproteobacter     | 0 | 0 | 1 | 0 | 0 |
| Glaciecola_nitratireducens_FR1064_       | Gammaproteobacter     | 0 | 0 | 0 | 1 | 0 |
| Glaciecola_psychrophila_170_uid193711    | Gammaproteobacter     | 0 | 0 | 0 | 2 | 0 |
| Glaciecola_4H_3_7_YE_5_uid66595          | Gammaproteobacter     | 0 | 0 | 0 | 0 | 0 |
| Marinobacter_adhaerens_HP15_uid1620      | Gammaproteobacter     | 0 | 0 | 0 | 0 | 0 |
| Marinobacter_aquaeolei_VT8_uid59419      | Gammaproteobacter     | 0 | 0 | 2 | 1 | 0 |
| Marinobacter_hydrocarbonoclasticus_AT    | Gammaproteobacter     | 0 | 0 | 0 | 0 | 0 |
| Marinobacter_BSs20148_uid171995          | Gammaproteobacter     | 0 | 0 | 0 | 1 | 0 |
| Saccharophagus_degradans_2_40_uid57      | Gammaproteobacter     | 0 | 0 | 0 | 0 | 0 |

|                                          |                   |   |   |    |    |   |
|------------------------------------------|-------------------|---|---|----|----|---|
| Teredinibacter_turnerae_T7901_uid5926    | Gammaproteobacter | 0 | 0 | 0  | 0  | 0 |
| Colwellia_psychrerythraea_34H_uid5785    | Gammaproteobacter | 0 | 0 | 0  | 3  | 1 |
| Ferrimonas_balearica_DSM_9799_uid533     | Gammaproteobacter | 0 | 0 | 0  | 1  | 0 |
| Idiomarina_loihiensis_GSL_199_uid20525   | Gammaproteobacter | 0 | 0 | 0  | 1  | 0 |
| Idiomarina_loihiensis_L2TR_uid58087      | Gammaproteobacter | 0 | 0 | 0  | 1  | 0 |
| Pseudoalteromonas_atlantica_T6c_uid58    | Gammaproteobacter | 0 | 0 | 0  | 0  | 0 |
| Pseudoalteromonas_haloplanktis_TAC12     | Gammaproteobacter | 0 | 1 | 4  | 3  | 0 |
| Pseudoalteromonas_SM9913_uid61247        | Gammaproteobacter | 0 | 0 | 0  | 2  | 0 |
| Psychromonas_ingrahamii_37_uid58521      | Gammaproteobacter | 0 | 0 | 2  | 4  | 0 |
| Psychromonas_CNPT3_uid54249              | Gammaproteobacter | 0 | 0 | 0  | 0  | 0 |
| Shewanella_amazonensis_SB2B_uid5825      | Gammaproteobacter | 0 | 0 | 0  | 9  | 0 |
| Shewanella_baltica_BA175_uid52601        | Gammaproteobacter | 0 | 0 | 0  | 1  | 0 |
| Shewanella_baltica_OS117_uid162025       | Gammaproteobacter | 0 | 0 | 0  | 0  | 0 |
| Shewanella_baltica_OS155_uid58259        | Gammaproteobacter | 0 | 0 | 0  | 0  | 0 |
| Shewanella_baltica_OS185_uid58743        | Gammaproteobacter | 0 | 0 | 0  | 2  | 0 |
| Shewanella_baltica_OS195_uid58261        | Gammaproteobacter | 0 | 0 | 0  | 0  | 0 |
| Shewanella_baltica_OS223_uid58775        | Gammaproteobacter | 0 | 0 | 0  | 0  | 0 |
| Shewanella_baltica_OS678_uid50553        | Gammaproteobacter | 0 | 0 | 0  | 0  | 0 |
| Shewanella_denitrificans_OS217_uid582    | Gammaproteobacter | 0 | 0 | 0  | 0  | 0 |
| Shewanella_frigidimarina_NCIMB_400_u     | Gammaproteobacter | 0 | 0 | 0  | 0  | 0 |
| Shewanella_halifaxensis_HAW_EB4_uid5     | Gammaproteobacter | 0 | 0 | 0  | 0  | 0 |
| Shewanella_loihica_PV_4_uid58349         | Gammaproteobacter | 0 | 0 | 0  | 0  | 0 |
| Shewanella_oneidensis_MR_1_uid57949      | Gammaproteobacter | 0 | 0 | 0  | 1  | 0 |
| Shewanella_pealeana_ATCC_700345_uid      | Gammaproteobacter | 0 | 0 | 0  | 1  | 0 |
| Shewanella_piezotolerans_WP3_uid5874     | Gammaproteobacter | 0 | 0 | 0  | 1  | 0 |
| Shewanella_putrefaciens_200_uid161927    | Gammaproteobacter | 0 | 0 | 2  | 1  | 0 |
| Shewanella_putrefaciens_CN_32_uid582     | Gammaproteobacter | 0 | 0 | 0  | 0  | 0 |
| Shewanella_sediminis_HAW_EB3_uid588      | Gammaproteobacter | 0 | 0 | 0  | 1  | 0 |
| Shewanella_ANA_3_uid58347                | Gammaproteobacter | 0 | 0 | 4  | 2  | 0 |
| Shewanella_MR_4_uid58345                 | Gammaproteobacter | 0 | 0 | 0  | 4  | 0 |
| Shewanella_MR_7_uid58343                 | Gammaproteobacter | 0 | 0 | 0  | 0  | 0 |
| Shewanella_W3_18_1_uid58341              | Gammaproteobacter | 0 | 0 | 0  | 0  | 0 |
| Shewanella_violacea_DSS12_uid47085       | Gammaproteobacter | 0 | 0 | 0  | 1  | 0 |
| Shewanella_woodyi_ATCC_51908_uid587      | Gammaproteobacter | 0 | 0 | 0  | 11 | 0 |
| Dichelobacter_nodosus_VCS1703A_uid57     | Gammaproteobacter | 0 | 0 | 2  | 3  | 0 |
| Allochromatium_vinosum_DSM_180_uid       | Gammaproteobacter | 0 | 5 | 2  | 2  | 0 |
| Nitrosococcus_halophilus_Nc4_uid46803    | Gammaproteobacter | 0 | 7 | 24 | 13 | 4 |
| Nitrosococcus_oceani_ATCC_19707_uid5     | Gammaproteobacter | 0 | 0 | 22 | 5  | 0 |
| Nitrosococcus_watsonii_C_113_uid50331    | Gammaproteobacter | 0 | 1 | 5  | 3  | 0 |
| Thiocystis_violascens_DSM_198_uid7402    | Gammaproteobacter | 0 | 0 | 3  | 7  | 2 |
| Thioflavicoccus_mobilis_8321_uid184343   | Gammaproteobacter | 0 | 0 | 0  | 10 | 0 |
| Alkalilimnicola_ehrlichii_MLHE_1_uid584  | Gammaproteobacter | 0 | 0 | 0  | 1  | 0 |
| Halorhodospira_halophila_SL1_uid58473    | Gammaproteobacter | 0 | 0 | 1  | 0  | 0 |
| Ectothiorhodospiraceae_bacterium_M19     | Gammaproteobacter | 0 | 0 | 0  | 1  | 0 |
| Spiribacter_UAH_SP71_uid226111           | Gammaproteobacter | 0 | 0 | 0  | 0  | 0 |
| Thioalkalivibrio_nitratireducens_DSM_14  | Gammaproteobacter | 0 | 0 | 0  | 4  | 0 |
| Thioalkalivibrio_K90mix_uid46181         | Gammaproteobacter | 0 | 0 | 2  | 9  | 0 |
| Thioalkalivibrio_sulfidophilus_HL_EbGr7  | Gammaproteobacter | 0 | 0 | 0  | 5  | 0 |
| Halothiobacillus_neapolitanus_c2_uid413  | Gammaproteobacter | 0 | 0 | 0  | 0  | 0 |
| Buchnera_aphidicola_Ak__Acyrthosiphon    | Gammaproteobacter | 0 | 0 | 0  | 0  | 0 |
| Buchnera_aphidicola_APS__Acyrthosiphon   | Gammaproteobacter | 0 | 0 | 0  | 0  | 0 |
| Buchnera_aphidicola_5A__Acyrthosiphon    | Gammaproteobacter | 0 | 0 | 0  | 0  | 0 |
| Buchnera_aphidicola_JF98__Acyrthosiphon  | Gammaproteobacter | 0 | 0 | 0  | 0  | 0 |
| Buchnera_aphidicola_JF99__Acyrthosiphon  | Gammaproteobacter | 0 | 0 | 0  | 0  | 0 |
| Buchnera_aphidicola_LL01__Acyrthosiphon  | Gammaproteobacter | 0 | 0 | 0  | 0  | 0 |
| Buchnera_aphidicola_TLW03__Acyrthosiphon | Gammaproteobacter | 0 | 0 | 0  | 0  | 0 |

|                                          |                   |   |   |   |    |   |
|------------------------------------------|-------------------|---|---|---|----|---|
| Buchnera_aphidicola_Tuc7__Acyrtosiph     | Gammaproteobacter | 0 | 0 | 0 | 0  | 0 |
| Buchnera_aphidicola_Bp__Baizongia_pist   | Gammaproteobacter | 0 | 0 | 0 | 0  | 0 |
| Buchnera_aphidicola_Cc__Cinara_cedri__   | Gammaproteobacter | 0 | 0 | 0 | 0  | 0 |
| Buchnera_aphidicola__Cinara_tujafilina__ | Gammaproteobacter | 0 | 0 | 0 | 0  | 0 |
| Buchnera_aphidicola_Sg__Schizaphis_gra   | Gammaproteobacter | 0 | 0 | 0 | 0  | 0 |
| Buchnera_aphidicola_Ua__Uroleucon_arr    | Gammaproteobacter | 0 | 0 | 0 | 0  | 0 |
| Candidatus_Moranella_endobia_PCIT_uid    | Gammaproteobacter | 0 | 0 | 0 | 0  | 0 |
| Candidatus_Moranella_endobia_PCVAL_u     | Gammaproteobacter | 0 | 0 | 0 | 0  | 0 |
| Candidatus_Riesia_pediculicola_USDA_uir  | Gammaproteobacter | 0 | 0 | 0 | 0  | 0 |
| Citrobacter_koseri_ATCC_BAA_895_uid58    | Gammaproteobacter | 0 | 0 | 0 | 1  | 0 |
| Citrobacter_rodentium_ICC168_uid43089    | Gammaproteobacter | 0 | 0 | 0 | 1  | 0 |
| Cronobacter_sakazakii_ATCC_BAA_894_u     | Gammaproteobacter | 0 | 0 | 0 | 0  | 0 |
| Cronobacter_sakazakii_45402_uid231516    | Gammaproteobacter | 0 | 0 | 0 | 1  | 0 |
| Cronobacter_sakazakii_ES15_uid167045     | Gammaproteobacter | 0 | 0 | 0 | 1  | 0 |
| Cronobacter_sakazakii_Sp291_uid189241    | Gammaproteobacter | 0 | 0 | 0 | 0  | 0 |
| Cronobacter_turicensis_z3032_uid40821    | Gammaproteobacter | 0 | 0 | 0 | 0  | 0 |
| Dickeya_dadantii_3937_uid52537           | Gammaproteobacter | 0 | 0 | 0 | 5  | 0 |
| Dickeya_dadantii_Ech586_uid42519         | Gammaproteobacter | 0 | 0 | 0 | 1  | 0 |
| Dickeya_dadantii_Ech703_uid59363         | Gammaproteobacter | 0 | 0 | 0 | 0  | 0 |
| Dickeya_zeae_Ech1591_uid59297            | Gammaproteobacter | 0 | 0 | 0 | 0  | 0 |
| Edwardsiella_ictaluri_93_146_uid59403    | Gammaproteobacter | 0 | 0 | 5 | 4  | 0 |
| Edwardsiella_tarda_C07_087_uid193773     | Gammaproteobacter | 0 | 0 | 0 | 1  | 0 |
| Edwardsiella_tarda_EIB202_uid41819       | Gammaproteobacter | 0 | 0 | 0 | 0  | 0 |
| Edwardsiella_tarda_FL6_60_uid159657      | Gammaproteobacter | 0 | 0 | 0 | 1  | 0 |
| Enterobacter_aerogenes_EA1509E_uid18     | Gammaproteobacter | 0 | 0 | 0 | 1  | 0 |
| Enterobacter_aerogenes_KCTC_2190_uid     | Gammaproteobacter | 0 | 0 | 1 | 3  | 0 |
| Enterobacter_asburiae_LF7a_uid72793      | Gammaproteobacter | 0 | 0 | 0 | 0  | 0 |
| Enterobacter_cloacae_EcWSU1_uid80739     | Gammaproteobacter | 0 | 0 | 0 | 0  | 0 |
| Enterobacter_cloacae_ATCC_13047_uid4     | Gammaproteobacter | 0 | 0 | 0 | 1  | 0 |
| Enterobacter_cloacae_ENHKU01_uid1724     | Gammaproteobacter | 0 | 0 | 0 | 0  | 0 |
| Enterobacter_cloacae_NCTC_9394_uid19     | Gammaproteobacter | 0 | 0 | 0 | 1  | 0 |
| Enterobacter_cloacae_dissolvens_SDM_u    | Gammaproteobacter | 0 | 0 | 0 | 0  | 0 |
| Enterobacter_cloacae_SCF1_uid59969       | Gammaproteobacter | 0 | 0 | 0 | 1  | 0 |
| Enterobacter_638_uid58727                | Gammaproteobacter | 0 | 0 | 0 | 0  | 0 |
| Enterobacter_R4_368_uid208672            | Gammaproteobacter | 0 | 0 | 0 | 1  | 0 |
| Erwinia_amylovora_ATCC_49946_uid469      | Gammaproteobacter | 0 | 0 | 0 | 0  | 0 |
| Erwinia_amylovora_CFBP1430_uid46839      | Gammaproteobacter | 0 | 0 | 0 | 0  | 0 |
| Erwinia_billingiae_Eb661_uid50547        | Gammaproteobacter | 0 | 0 | 0 | 0  | 0 |
| Erwinia_pyrifoliae_DSM_12163_uid15969    | Gammaproteobacter | 0 | 0 | 0 | 0  | 0 |
| Erwinia_pyrifoliae_Ep1_96_uid40659       | Gammaproteobacter | 0 | 0 | 0 | 0  | 0 |
| Erwinia_Ejp617_uid159955                 | Gammaproteobacter | 0 | 0 | 0 | 0  | 0 |
| Erwinia_tasmaniensis_Et1_99_uid59029     | Gammaproteobacter | 0 | 0 | 0 | 0  | 0 |
| Escherichia_coli_536_uid58531            | Gammaproteobacter | 0 | 0 | 1 | 0  | 0 |
| Escherichia_coli_55989_uid59383          | Gammaproteobacter | 0 | 0 | 3 | 4  | 0 |
| Escherichia_coli_ABU_83972_uid161975     | Gammaproteobacter | 0 | 0 | 2 | 2  | 0 |
| Escherichia_coli_APEC_O1_uid58623        | Gammaproteobacter | 0 | 0 | 0 | 2  | 0 |
| Escherichia_coli_APEC_O78_uid187277      | Gammaproteobacter | 0 | 0 | 2 | 2  | 0 |
| Escherichia_coli_B_REL606_uid58803       | Gammaproteobacter | 0 | 0 | 1 | 0  | 0 |
| Escherichia_coli_BL21_DE3__uid161947     | Gammaproteobacter | 0 | 0 | 1 | 0  | 0 |
| Escherichia_coli_BL21_DE3__uid161949     | Gammaproteobacter | 0 | 0 | 1 | 0  | 0 |
| Escherichia_coli__BL21_Gold_DE3_pLysS    | Gammaproteobacter | 0 | 0 | 1 | 0  | 0 |
| Escherichia_coli_ATCC_8739_uid58783      | Gammaproteobacter | 0 | 0 | 2 | 0  | 0 |
| Escherichia_coli_CFT073_uid57915         | Gammaproteobacter | 0 | 0 | 2 | 20 | 0 |
| Escherichia_coli_DH1_uid161951           | Gammaproteobacter | 0 | 0 | 1 | 0  | 0 |
| Escherichia_coli_DH1_uid162051           | Gammaproteobacter | 0 | 0 | 1 | 2  | 0 |
| Escherichia_coli_E24377A_uid58395        | Gammaproteobacter | 0 | 0 | 3 | 1  | 0 |



|                                        |                   |   |   |   |   |   |
|----------------------------------------|-------------------|---|---|---|---|---|
| Escherichia_coli_ED1a_uid59379         | Gammaproteobacter | 0 | 0 | 1 | 3 | 0 |
| Escherichia_coli_ETEC_H10407_uid16199  | Gammaproteobacter | 0 | 0 | 2 | 0 | 0 |
| Escherichia_coli_HS_uid58393           | Gammaproteobacter | 0 | 0 | 2 | 1 | 0 |
| Escherichia_coli_IAI1_uid59377         | Gammaproteobacter | 0 | 0 | 3 | 3 | 0 |
| Escherichia_coli_IAI39_uid59381        | Gammaproteobacter | 0 | 0 | 1 | 2 | 0 |
| Escherichia_coli_IHE3034_uid162007     | Gammaproteobacter | 0 | 0 | 0 | 1 | 0 |
| Escherichia_coli_JJ1886_uid226103      | Gammaproteobacter | 0 | 0 | 1 | 3 | 0 |
| Escherichia_coli_BW2952_uid59391       | Gammaproteobacter | 0 | 0 | 1 | 0 | 0 |
| Escherichia_coli_K_12_substr__DH10B_ui | Gammaproteobacter | 0 | 0 | 1 | 0 | 0 |
| Escherichia_coli_K_12_substr__MDS42_u  | Gammaproteobacter | 0 | 0 | 1 | 0 | 0 |
| Escherichia_coli_K_12_substr__MG1655_  | Gammaproteobacter | 0 | 0 | 1 | 0 | 0 |
| Escherichia_coli_K_12_substr__W3110_u  | Gammaproteobacter | 0 | 0 | 1 | 0 | 0 |
| Escherichia_coli_KO11FL_uid162099      | Gammaproteobacter | 0 | 0 | 4 | 3 | 0 |
| Escherichia_coli_KO11FL_uid52593       | Gammaproteobacter | 0 | 0 | 4 | 2 | 0 |
| Escherichia_coli_LF82_uid161965        | Gammaproteobacter | 0 | 0 | 1 | 2 | 0 |
| Escherichia_coli_LY180_uid219461       | Gammaproteobacter | 0 | 0 | 4 | 3 | 0 |
| Escherichia_coli_NA114_uid162139       | Gammaproteobacter | 0 | 0 | 1 | 1 | 0 |
| Escherichia_coli_O103_H2_12009_uid41C  | Gammaproteobacter | 0 | 0 | 2 | 1 | 0 |
| Escherichia_coli_O104_H4_2009EL_2050_  | Gammaproteobacter | 0 | 0 | 3 | 3 | 0 |
| Escherichia_coli_O104_H4_2009EL_2071_  | Gammaproteobacter | 0 | 0 | 3 | 3 | 0 |
| Escherichia_coli_O104_H4_2011C_3493_   | Gammaproteobacter | 0 | 0 | 3 | 3 | 0 |
| Escherichia_coli_O111_H_11128_uid41C   | Gammaproteobacter | 0 | 0 | 3 | 1 | 0 |
| Escherichia_coli_O127_H6_E2348_69_uic  | Gammaproteobacter | 0 | 0 | 1 | 8 | 0 |
| Escherichia_coli_O157_H7_EC4115_uid59  | Gammaproteobacter | 0 | 0 | 2 | 1 | 0 |
| Escherichia_coli_O157_H7_EDL933_uid57  | Gammaproteobacter | 0 | 0 | 2 | 1 | 0 |
| Escherichia_coli_O157_H7_Sakai_uid5778 | Gammaproteobacter | 0 | 0 | 2 | 2 | 0 |
| Escherichia_coli_O157_H7_TW14359_uid   | Gammaproteobacter | 0 | 0 | 2 | 2 | 0 |
| Escherichia_coli_O26_H11_11368_uid41C  | Gammaproteobacter | 0 | 0 | 3 | 2 | 0 |
| Escherichia_coli_O42_uid161985         | Gammaproteobacter | 0 | 0 | 2 | 2 | 0 |
| Escherichia_coli_O55_H7_CB9615_uid466  | Gammaproteobacter | 0 | 0 | 2 | 2 | 0 |
| Escherichia_coli_O55_H7_RM12579_uid1   | Gammaproteobacter | 0 | 0 | 2 | 2 | 0 |
| Escherichia_coli_O7_K1_CE10_uid162115  | Gammaproteobacter | 0 | 0 | 2 | 1 | 0 |
| Escherichia_coli_O83_H1_NRG_857C_uid   | Gammaproteobacter | 0 | 0 | 1 | 2 | 0 |
| Escherichia_coli_P12b_uid162061        | Gammaproteobacter | 0 | 0 | 3 | 5 | 0 |
| Escherichia_coli_PMV_1_uid219679       | Gammaproteobacter | 0 | 0 | 0 | 1 | 0 |
| Escherichia_coli_S88_uid62979          | Gammaproteobacter | 0 | 0 | 0 | 1 | 0 |
| Escherichia_coli_SE11_uid59425         | Gammaproteobacter | 0 | 0 | 4 | 0 | 0 |
| Escherichia_coli_SE15_uid161939        | Gammaproteobacter | 0 | 0 | 1 | 1 | 0 |
| Escherichia_coli_SMS_3_5_uid58919      | Gammaproteobacter | 0 | 0 | 2 | 1 | 0 |
| Escherichia_coli__clone_D_i14_uid1620  | Gammaproteobacter | 0 | 0 | 2 | 2 | 0 |
| Escherichia_coli__clone_D_i2_uid16204  | Gammaproteobacter | 0 | 0 | 2 | 2 | 0 |
| Escherichia_coli_UM146_uid162043       | Gammaproteobacter | 0 | 0 | 0 | 1 | 0 |
| Escherichia_coli_UMN026_uid62981       | Gammaproteobacter | 0 | 0 | 3 | 6 | 0 |
| Escherichia_coli_UMNK88_uid161991      | Gammaproteobacter | 0 | 0 | 3 | 0 | 0 |
| Escherichia_coli_UTI89_uid58541        | Gammaproteobacter | 0 | 0 | 0 | 1 | 0 |
| Escherichia_coli_W_uid162011           | Gammaproteobacter | 0 | 0 | 4 | 0 | 0 |
| Escherichia_coli_W_uid162101           | Gammaproteobacter | 0 | 0 | 4 | 3 | 0 |
| Escherichia_coli_Xuzhou21_uid163995    | Gammaproteobacter | 0 | 0 | 2 | 2 | 0 |
| Escherichia_fergusonii_ATCC_35469_uid5 | Gammaproteobacter | 0 | 0 | 1 | 1 | 0 |
| Klebsiella_oxytoca_E718_uid170256      | Gammaproteobacter | 0 | 0 | 1 | 3 | 0 |
| Klebsiella_oxytoca_KCTC_1686_uid83159  | Gammaproteobacter | 0 | 0 | 1 | 4 | 0 |
| Klebsiella_pneumoniae_uid203334        | Gammaproteobacter | 0 | 0 | 2 | 2 | 0 |
| Klebsiella_pneumoniae_342_uid59145     | Gammaproteobacter | 0 | 0 | 0 | 0 | 0 |
| Klebsiella_pneumoniae_CG43_uid223021   | Gammaproteobacter | 0 | 0 | 0 | 0 | 0 |
| Klebsiella_pneumoniae_JM45_uid215235   | Gammaproteobacter | 0 | 0 | 0 | 0 | 0 |
| Klebsiella_pneumoniae_KCTC_2242_uid1   | Gammaproteobacter | 0 | 0 | 0 | 0 | 0 |

|                                           |                   |   |   |    |    |   |
|-------------------------------------------|-------------------|---|---|----|----|---|
| Klebsiella_pneumoniae_1084_uid174151      | Gammaproteobacter | 0 | 0 | 0  | 0  | 0 |
| Klebsiella_pneumoniae_HS11286_uid843      | Gammaproteobacter | 0 | 0 | 0  | 0  | 0 |
| Klebsiella_pneumoniae_MGH_78578_uid       | Gammaproteobacter | 0 | 0 | 0  | 0  | 0 |
| Klebsiella_pneumoniae_NTUH_K2044_uic      | Gammaproteobacter | 0 | 0 | 0  | 0  | 0 |
| Klebsiella_variicola_At_22_uid42113       | Gammaproteobacter | 0 | 0 | 0  | 0  | 0 |
| Morganella_morganii_KT_uid180867          | Gammaproteobacter | 0 | 0 | 0  | 1  | 0 |
| Pantoea_ananatis_AJ13355_uid162073        | Gammaproteobacter | 0 | 0 | 0  | 0  | 0 |
| Pantoea_ananatis_LMG_20103_uid46807       | Gammaproteobacter | 0 | 0 | 0  | 0  | 0 |
| Pantoea_ananatis_uid86861                 | Gammaproteobacter | 0 | 0 | 0  | 0  | 0 |
| Pantoea_ananatis_PA13_uid162181           | Gammaproteobacter | 0 | 0 | 0  | 0  | 0 |
| Pantoea_At_9b_uid55845                    | Gammaproteobacter | 0 | 0 | 0  | 0  | 0 |
| Pantoea_vagans_C9_1_uid49871              | Gammaproteobacter | 0 | 0 | 0  | 0  | 0 |
| Pectobacterium_atrosepticum_SCR11043      | Gammaproteobacter | 0 | 0 | 0  | 1  | 0 |
| Pectobacterium_carotovorum_PC1_uid59      | Gammaproteobacter | 0 | 0 | 0  | 0  | 0 |
| Pectobacterium_carotovorum_PCC21_uic      | Gammaproteobacter | 0 | 0 | 0  | 0  | 0 |
| Pectobacterium_SCC3193_uid193707          | Gammaproteobacter | 0 | 0 | 0  | 2  | 0 |
| Pectobacterium_wasabiae_WPP163_uid4       | Gammaproteobacter | 0 | 0 | 0  | 3  | 0 |
| Photorhabdus_asymbiotica_ATCC_43949       | Gammaproteobacter | 0 | 0 | 1  | 2  | 0 |
| Photorhabdus_luminescens_laumondii_T      | Gammaproteobacter | 0 | 0 | 1  | 8  | 0 |
| Proteus_mirabilis_BB2000_uid214430        | Gammaproteobacter | 0 | 0 | 11 | 9  | 0 |
| Proteus_mirabilis_HI4320_uid61599         | Gammaproteobacter | 0 | 0 | 13 | 14 | 0 |
| Providencia_stuartii_MRSN_2154_uid162     | Gammaproteobacter | 0 | 0 | 0  | 1  | 0 |
| Rahnella_aquatilis_CIP_78_65__ATCC_3      | Gammaproteobacter | 0 | 0 | 0  | 10 | 0 |
| Rahnella_aquatilis_HX2_uid158049          | Gammaproteobacter | 0 | 0 | 0  | 0  | 0 |
| Rahnella_Y9602_uid62715                   | Gammaproteobacter | 0 | 0 | 0  | 0  | 0 |
| Raoultella_ornithinolytica_B6_uid198431   | Gammaproteobacter | 0 | 0 | 1  | 0  | 0 |
| Salmonella_bongori_Sbon_167_uid21308      | Gammaproteobacter | 0 | 0 | 3  | 5  | 0 |
| Salmonella_bongori_NCTC_12419_uid701      | Gammaproteobacter | 0 | 0 | 1  | 2  | 0 |
| Salmonella_enterica_arizonae_serovar_6    | Gammaproteobacter | 0 | 0 | 0  | 0  | 0 |
| Salmonella_enterica_serovar_4_5_12_i__    | Gammaproteobacter | 0 | 0 | 1  | 9  | 0 |
| Salmonella_enterica_serovar_Agona_242     | Gammaproteobacter | 0 | 0 | 1  | 0  | 0 |
| Salmonella_enterica_serovar_Agona_SL4     | Gammaproteobacter | 0 | 0 | 0  | 0  | 0 |
| Salmonella_enterica_serovar_Bareilly_CF   | Gammaproteobacter | 0 | 0 | 1  | 0  | 0 |
| Salmonella_enterica_serovar_Bovismorbi    | Gammaproteobacter | 0 | 0 | 0  | 0  | 0 |
| Salmonella_enterica_serovar_Choleraesu    | Gammaproteobacter | 0 | 0 | 1  | 1  | 0 |
| Salmonella_enterica_Serovar_Cubana_CF     | Gammaproteobacter | 0 | 0 | 0  | 1  | 0 |
| Salmonella_enterica_serovar_Dublin_CT     | Gammaproteobacter | 0 | 0 | 0  | 1  | 0 |
| Salmonella_enterica_serovar_Enteritidis   | Gammaproteobacter | 0 | 0 | 0  | 0  | 0 |
| Salmonella_enterica_serovar_Gallinarum    | Gammaproteobacter | 0 | 0 | 0  | 0  | 0 |
| Salmonella_enterica_serovar_Gallinarum    | Gammaproteobacter | 0 | 0 | 0  | 0  | 0 |
| Salmonella_enterica_serovar_Gallinarum    | Gammaproteobacter | 0 | 0 | 0  | 0  | 0 |
| Salmonella_enterica_Serovar_Heidelberg    | Gammaproteobacter | 0 | 0 | 0  | 4  | 0 |
| Salmonella_enterica_serovar_Heidelberg    | Gammaproteobacter | 0 | 0 | 0  | 4  | 0 |
| Salmonella_enterica_serovar_Heidelberg    | Gammaproteobacter | 0 | 0 | 0  | 4  | 0 |
| Salmonella_enterica_serovar_Heidelberg    | Gammaproteobacter | 0 | 0 | 0  | 4  | 0 |
| Salmonella_enterica_serovar_Javiana_CF    | Gammaproteobacter | 0 | 0 | 1  | 2  | 0 |
| Salmonella_enterica_serovar_Newport_S     | Gammaproteobacter | 0 | 0 | 1  | 0  | 0 |
| Salmonella_enterica_serovar_Newport_U     | Gammaproteobacter | 0 | 0 | 2  | 0  | 0 |
| Salmonella_enterica_serovar_Paratyphi_7   | Gammaproteobacter | 0 | 0 | 1  | 7  | 0 |
| Salmonella_enterica_serovar_Paratyphi_7   | Gammaproteobacter | 0 | 0 | 1  | 7  | 0 |
| Salmonella_enterica_serovar_Paratyphi_I   | Gammaproteobacter | 0 | 0 | 0  | 7  | 0 |
| Salmonella_enterica_serovar_Paratyphi_I   | Gammaproteobacter | 0 | 0 | 0  | 1  | 0 |
| Salmonella_enterica_serovar_Pullorum_S    | Gammaproteobacter | 0 | 0 | 0  | 1  | 0 |
| Salmonella_enterica_serovar_Schwarzenberg | Gammaproteobacter | 0 | 0 | 0  | 0  | 0 |
| Salmonella_enterica_serovar_Thompson      | Gammaproteobacter | 0 | 0 | 0  | 0  | 0 |
| Salmonella_enterica_serovar_Typhi_CT18    | Gammaproteobacter | 0 | 0 | 1  | 27 | 0 |

|                                                             |   |   |   |     |   |
|-------------------------------------------------------------|---|---|---|-----|---|
| Salmonella_enterica_serovar_Typhi_P_st:Gammaproteobacter    | 0 | 0 | 1 | 26  | 0 |
| Salmonella_enterica_serovar_Typhi_Ty21Gammaproteobacter     | 0 | 0 | 1 | 27  | 0 |
| Salmonella_enterica_serovar_Typhi_Ty2_Gammaproteobacter     | 0 | 0 | 1 | 27  | 0 |
| Salmonella_enterica_Serovar_TyphimuriuGammaproteobacter     | 0 | 0 | 0 | 8   | 0 |
| Salmonella_enterica_serovar_TyphimuriuGammaproteobacter     | 0 | 0 | 2 | 11  | 0 |
| Salmonella_enterica_serovar_TyphimuriuGammaproteobacter     | 0 | 0 | 1 | 6   | 0 |
| Salmonella_enterica_serovar_TyphimuriuGammaproteobacter     | 0 | 0 | 1 | 8   | 0 |
| Salmonella_enterica_serovar_TyphimuriuGammaproteobacter     | 0 | 0 | 1 | 8   | 0 |
| Salmonella_enterica_serovar_TyphimuriuGammaproteobacter     | 0 | 0 | 1 | 10  | 0 |
| Salmonella_typhimurium_DT104_uid2232Gammaproteobacter       | 0 | 0 | 0 | 12  | 0 |
| Salmonella_enterica_serovar_TyphimuriuGammaproteobacter     | 0 | 0 | 1 | 7   | 0 |
| Salmonella_enterica_serovar_TyphimuriuGammaproteobacter     | 0 | 0 | 1 | 6   | 0 |
| Salmonella_enterica_serovar_TyphimuriuGammaproteobacter     | 0 | 0 | 1 | 7   | 0 |
| Salmonella_enterica_serovar_TyphimuriuGammaproteobacter     | 0 | 0 | 1 | 9   | 0 |
| Salmonella_enterica_serovar_TyphimuriuGammaproteobacter     | 0 | 0 | 1 | 7   | 0 |
| Serratia_liquefaciens_ATCC_27592_uid21Gammaproteobacter     | 0 | 0 | 0 | 0   | 0 |
| Serratia_marcescens_FGI94_uid185180 Gammaproteobacter       | 0 | 0 | 0 | 0   | 0 |
| Serratia_marcescens_WW4_uid188478 Gammaproteobacter         | 0 | 0 | 0 | 0   | 0 |
| Serratia_odorifera_4Rx13_uid42253 Gammaproteobacter         | 0 | 0 | 0 | 0   | 0 |
| Serratia_plymuthica_AS9_uid67313 Gammaproteobacter          | 0 | 0 | 0 | 0   | 0 |
| Serratia_plymuthica_S13_uid210642 Gammaproteobacter         | 0 | 0 | 1 | 1   | 0 |
| Serratia_proteamaculans_568_uid58725 Gammaproteobacter      | 0 | 0 | 3 | 0   | 0 |
| Serratia_AS12_uid67315 Gammaproteobacter                    | 0 | 0 | 0 | 0   | 0 |
| Serratia_AS13_uid162065 Gammaproteobacter                   | 0 | 0 | 0 | 0   | 0 |
| Serratia_ATCC_39006_uid218470 Gammaproteobacter             | 0 | 0 | 0 | 1   | 0 |
| Serratia_symbiotica_Cinara_cedri_uid8Gammaproteobacter      | 0 | 0 | 0 | 0   | 0 |
| Shigella_boydii_CDC_3083_94_uid58415 Gammaproteobacter      | 0 | 0 | 2 | 0   | 0 |
| Shigella_boydii_Sb227_uid58215 Gammaproteobacter            | 0 | 0 | 1 | 0   | 0 |
| Shigella_dysenteriae_1617_uid229875 Gammaproteobacter       | 0 | 0 | 1 | 2   | 0 |
| Shigella_dysenteriae_Sd197_uid58213 Gammaproteobacter       | 0 | 0 | 1 | 1   | 0 |
| Shigella_flexneri_2002017_uid159233 Gammaproteobacter       | 0 | 0 | 3 | 1   | 0 |
| Shigella_flexneri_2a_2457T_uid57991 Gammaproteobacter       | 0 | 0 | 2 | 0   | 0 |
| Shigella_flexneri_2a_301_uid62907 Gammaproteobacter         | 0 | 0 | 0 | 0   | 0 |
| Shigella_flexneri_5_8401_uid58583 Gammaproteobacter         | 0 | 0 | 3 | 0   | 0 |
| Shigella_sonnei_53G_uid84383 Gammaproteobacter              | 0 | 0 | 3 | 2   | 0 |
| Shigella_sonnei_Ss046_uid58217 Gammaproteobacter            | 0 | 0 | 3 | 0   | 0 |
| Escherichia_blatiae_DSM_4481_uid16504Gammaproteobacter      | 0 | 0 | 1 | 2   | 0 |
| Sodalis_glossinidius_morsitans_uid585!Gammaproteobacter     | 0 | 0 | 0 | 0   | 0 |
| Candidatus_Blochmannia_chromaiodes_€Gammaproteobacter       | 0 | 0 | 0 | 0   | 0 |
| Candidatus_Blochmannia_floridanus_uid!Gammaproteobacter     | 0 | 0 | 0 | 0   | 0 |
| Candidatus_Blochmannia_pennsylvanicusGammaproteobacter      | 0 | 0 | 0 | 0   | 0 |
| Candidatus_Blochmannia_vafer_BVAF_uirGammaproteobacter      | 0 | 0 | 0 | 0   | 0 |
| Candidatus_Hamiltonella_defensa_5AT__Gammaproteobacter      | 0 | 0 | 0 | 0   | 0 |
| secondary_endosymbiont_of_CtenarytairGammaproteobacter      | 0 | 0 | 0 | 0   | 0 |
| secondary_endosymbiont_of_HeteropsyllGammaproteobacter      | 0 | 0 | 0 | 0   | 0 |
| Enterobacteriaceae_bacterium_FGI_57_uGammaproteobacter      | 0 | 0 | 0 | 0   | 0 |
| Wigglesworthia_glossinidia_endosymbiorGammaproteobacter     | 0 | 0 | 0 | 0   | 0 |
| Wigglesworthia_glossinidia_endosymbiorGammaproteobacter     | 0 | 0 | 0 | 0   | 0 |
| Xenorhabdus_bovienii_SS_2004_uid4634!Gammaproteobacter      | 0 | 0 | 0 | 3   | 0 |
| Xenorhabdus_nematophila_ATCC_19061_Gammaproteobacter        | 0 | 0 | 7 | 10  | 0 |
| Yersinia_enterocolitica_8081_uid57741 Gammaproteobacter     | 0 | 0 | 0 | 4   | 0 |
| Yersinia_enterocolitica_palaearctica_105_!Gammaproteobacter | 0 | 0 | 0 | 0   | 0 |
| Yersinia_enterocolitica_palaearctica_Y11_!Gammaproteobacter | 0 | 0 | 0 | 0   | 0 |
| Yersinia_pestis_A1122_uid158119 Gammaproteobacter           | 0 | 0 | 0 | 67  | 0 |
| Yersinia_pestis_Angola_uid58485 Gammaproteobacter           | 0 | 0 | 0 | 101 | 0 |
| Yersinia_pestis_Antiqua_uid58607 Gammaproteobacter          | 0 | 0 | 0 | 67  | 0 |

|                                          |                   |   |   |   |    |   |
|------------------------------------------|-------------------|---|---|---|----|---|
| Yersinia_pestis_CO92_uid57621            | Gammaproteobacter | 0 | 0 | 0 | 66 | 0 |
| Yersinia_pestis_D106004_uid158071        | Gammaproteobacter | 0 | 0 | 0 | 59 | 0 |
| Yersinia_pestis_D182038_uid158073        | Gammaproteobacter | 0 | 0 | 0 | 64 | 0 |
| Yersinia_pestis_KIM_10_uid57875          | Gammaproteobacter | 0 | 0 | 0 | 53 | 0 |
| Yersinia_pestis_Nepal516_uid58609        | Gammaproteobacter | 0 | 0 | 0 | 64 | 0 |
| Yersinia_pestis_Pestoides_F_uid58619     | Gammaproteobacter | 0 | 0 | 0 | 56 | 0 |
| Yersinia_pestis_biovar_Microtus_91001_1  | Gammaproteobacter | 0 | 0 | 0 | 48 | 0 |
| Yersinia_pestis_biovar_Medievalis_Harbir | Gammaproteobacter | 0 | 0 | 0 | 61 | 0 |
| Yersinia_pestis_Z176003_uid47317         | Gammaproteobacter | 0 | 0 | 0 | 63 | 0 |
| Yersinia_pseudotuberculosis_IP_31758_u   | Gammaproteobacter | 0 | 0 | 0 | 15 | 0 |
| Yersinia_pseudotuberculosis_IP_32953_u   | Gammaproteobacter | 0 | 0 | 0 | 5  | 0 |
| Yersinia_pseudotuberculosis_PB1__uid59   | Gammaproteobacter | 0 | 0 | 0 | 2  | 0 |
| Yersinia_pseudotuberculosis_YPIII_uid591 | Gammaproteobacter | 0 | 0 | 0 | 14 | 0 |
| Coxiella_burnetii_CbuG_Q212_uid58893     | Gammaproteobacter | 0 | 0 | 0 | 2  | 0 |
| Coxiella_burnetii_CbuK_Q154_uid58895     | Gammaproteobacter | 0 | 0 | 0 | 2  | 0 |
| Coxiella_burnetii_Dugway_5J108_111_uid   | Gammaproteobacter | 0 | 0 | 0 | 2  | 0 |
| Coxiella_burnetii_RSA_331_uid58637       | Gammaproteobacter | 0 | 0 | 0 | 0  | 0 |
| Coxiella_burnetii_RSA_493_uid57631       | Gammaproteobacter | 0 | 0 | 0 | 0  | 0 |
| Legionella_longbeachae_NSW150_uid460     | Gammaproteobacter | 0 | 0 | 0 | 0  | 0 |
| Legionella_pneumophila_2300_99_Alcoy     | Gammaproteobacter | 0 | 0 | 0 | 1  | 0 |
| Legionella_pneumophila_ATCC_43290_ui     | Gammaproteobacter | 0 | 0 | 0 | 1  | 0 |
| Legionella_pneumophila_Corby_uid58733    | Gammaproteobacter | 0 | 0 | 0 | 2  | 0 |
| Legionella_pneumophila_Lens_uid58209     | Gammaproteobacter | 0 | 0 | 0 | 1  | 0 |
| Legionella_pneumophila_Paris_uid58211    | Gammaproteobacter | 1 | 0 | 0 | 5  | 0 |
| Legionella_pneumophila_Lorraine_uid170   | Gammaproteobacter | 0 | 0 | 0 | 1  | 0 |
| Legionella_pneumophila_uid170534         | Gammaproteobacter | 0 | 0 | 0 | 1  | 0 |
| Legionella_pneumophila_Philadelphia_1_   | Gammaproteobacter | 0 | 0 | 0 | 1  | 0 |
| Legionella_pneumophila_Philadelphia_1_   | Gammaproteobacter | 0 | 0 | 0 | 1  | 0 |
| Legionella_pneumophila_Thunder_Bay_u     | Gammaproteobacter | 0 | 0 | 0 | 1  | 0 |
| Methylococcus_capsulatus_Bath_uid5760    | Gammaproteobacter | 0 | 0 | 0 | 1  | 0 |
| Methylomicrobium_alcaliphilum_uid7711    | Gammaproteobacter | 0 | 0 | 0 | 5  | 0 |
| Methylomonas_methanica_MC09_uid673       | Gammaproteobacter | 0 | 0 | 0 | 13 | 0 |
| Alcanivorax_borkumensis_SK2_uid58169     | Gammaproteobacter | 0 | 0 | 0 | 0  | 0 |
| Alcanivorax_dieselolei_B5_uid176364      | Gammaproteobacter | 0 | 0 | 0 | 4  | 0 |
| Kangiella_koreensis_DSM_16069_uid5920    | Gammaproteobacter | 0 | 0 | 0 | 0  | 0 |
| Hahella_chejuensis_KCTC_2396_uid58483    | Gammaproteobacter | 0 | 0 | 0 | 3  | 0 |
| Chromohalobacter_salexigens_DSM_3043     | Gammaproteobacter | 0 | 0 | 1 | 0  | 0 |
| Halomonas_elongata_DSM_2581_uid527       | Gammaproteobacter | 0 | 0 | 0 | 0  | 0 |
| Candidatus_Portiera_aleyrodidarum_BT_1   | Gammaproteobacter | 0 | 0 | 0 | 0  | 0 |
| Candidatus_Portiera_aleyrodidarum_BT_1   | Gammaproteobacter | 0 | 0 | 0 | 0  | 0 |
| Candidatus_Portiera_aleyrodidarum_BT_1   | Gammaproteobacter | 0 | 0 | 0 | 0  | 0 |
| Candidatus_Portiera_aleyrodidarum_BT_1   | Gammaproteobacter | 0 | 0 | 0 | 0  | 0 |
| Candidatus_Portiera_aleyrodidarum_TV_1   | Gammaproteobacter | 0 | 0 | 0 | 0  | 0 |
| Marinomonas_mediterranea_MMB_1_uid       | Gammaproteobacter | 0 | 0 | 0 | 1  | 0 |
| Marinomonas_posidonica_IVIA_Po_181_1     | Gammaproteobacter | 0 | 0 | 0 | 1  | 0 |
| Marinomonas_MWYL1_uid58715               | Gammaproteobacter | 0 | 0 | 0 | 3  | 0 |
| Thalassolituus_oleivorans_MIL_1_uid1950  | Gammaproteobacter | 0 | 0 | 0 | 2  | 0 |
| Actinobacillus_pleuropneumoniae_serovæ   | Gammaproteobacter | 0 | 0 | 0 | 1  | 0 |
| Actinobacillus_pleuropneumoniae_serovæ   | Gammaproteobacter | 0 | 0 | 0 | 1  | 0 |
| Actinobacillus_pleuropneumoniae_serovæ   | Gammaproteobacter | 0 | 0 | 0 | 1  | 0 |
| Actinobacillus_succinogenes_130Z_uid58   | Gammaproteobacter | 1 | 0 | 0 | 1  | 0 |
| Actinobacillus_suis_H91_0380_uid176363   | Gammaproteobacter | 1 | 0 | 0 | 4  | 0 |
| Aggregatibacter_actinomycetemcomitans    | Gammaproteobacter | 0 | 0 | 0 | 2  | 0 |
| Aggregatibacter_actinomycetemcomitans    | Gammaproteobacter | 0 | 0 | 0 | 0  | 0 |
| Aggregatibacter_aphrophilus_NJ8700_uid   | Gammaproteobacter | 0 | 0 | 0 | 2  | 0 |
| Mannheimia_succiniciproducens_MBEL55     | Gammaproteobacter | 0 | 0 | 0 | 2  | 0 |

|                                        |                   |   |   |    |   |   |
|----------------------------------------|-------------------|---|---|----|---|---|
| Bibersteinia_trehalosi_192_uid193709   | Gammaproteobacter | 1 | 0 | 1  | 4 | 0 |
| Gallibacterium_anatis_UMN179_uid6656   | Gammaproteobacter | 0 | 0 | 17 | 5 | 0 |
| Haemophilus_ducreyi_35000HP_uid5762    | Gammaproteobacter | 0 | 0 | 0  | 0 | 0 |
| Haemophilus_influenzae_10810_uid8664   | Gammaproteobacter | 0 | 0 | 0  | 0 | 0 |
| Haemophilus_influenzae_86_028NP_uid5   | Gammaproteobacter | 0 | 0 | 0  | 0 | 0 |
| Haemophilus_influenzae_F3031_uid6212   | Gammaproteobacter | 0 | 0 | 0  | 0 | 0 |
| Haemophilus_influenzae_F3047_uid6209   | Gammaproteobacter | 0 | 0 | 1  | 0 | 0 |
| Haemophilus_influenzae_KR494_uid2193   | Gammaproteobacter | 0 | 0 | 1  | 3 | 0 |
| Haemophilus_influenzae_PittEE_uid5859  | Gammaproteobacter | 0 | 0 | 1  | 0 | 0 |
| Haemophilus_influenzae_PittGG_uid5859  | Gammaproteobacter | 0 | 0 | 0  | 1 | 0 |
| Haemophilus_influenzae_R2846_uid1619   | Gammaproteobacter | 0 | 0 | 0  | 0 | 0 |
| Haemophilus_influenzae_R2866_uid1619   | Gammaproteobacter | 0 | 0 | 1  | 0 | 0 |
| Haemophilus_influenzae_Rd_KW20_uid5    | Gammaproteobacter | 0 | 0 | 0  | 1 | 0 |
| Haemophilus_parainfluenzae_T3T1_uid72  | Gammaproteobacter | 1 | 0 | 0  | 0 | 0 |
| Haemophilus_parasuis_SH0165_uid59273   | Gammaproteobacter | 0 | 0 | 0  | 2 | 0 |
| Haemophilus_parasuis_ZJ0906_uid20911   | Gammaproteobacter | 0 | 0 | 0  | 1 | 0 |
| Haemophilus_somnus_129PT_uid57929      | Gammaproteobacter | 0 | 0 | 5  | 2 | 0 |
| Haemophilus_somnus_2336_uid57979       | Gammaproteobacter | 0 | 0 | 4  | 4 | 0 |
| Mannheimia_haemolytica_D153_uid2123    | Gammaproteobacter | 0 | 0 | 1  | 2 | 0 |
| Mannheimia_haemolytica_D171_uid2123    | Gammaproteobacter | 0 | 0 | 0  | 2 | 0 |
| Mannheimia_haemolytica_D174_uid2123    | Gammaproteobacter | 0 | 0 | 1  | 2 | 0 |
| Mannheimia_haemolytica_M42548_uid1     | Gammaproteobacter | 0 | 0 | 3  | 4 | 0 |
| Mannheimia_haemolytica_USDA_ARS_US     | Gammaproteobacter | 0 | 0 | 1  | 3 | 0 |
| Mannheimia_haemolytica_USDA_ARS_SA     | Gammaproteobacter | 0 | 0 | 2  | 4 | 0 |
| Mannheimia_haemolytica_USMARC_228      | Gammaproteobacter | 0 | 0 | 3  | 5 | 0 |
| Pasteurella_multocida_36950_uid86887   | Gammaproteobacter | 0 | 0 | 0  | 7 | 0 |
| Pasteurella_multocida_3480_uid161955   | Gammaproteobacter | 0 | 0 | 0  | 0 | 0 |
| Pasteurella_multocida_HN06_uid156881   | Gammaproteobacter | 0 | 0 | 0  | 1 | 0 |
| Pasteurella_multocida_Pm70_uid57627    | Gammaproteobacter | 1 | 0 | 0  | 0 | 0 |
| Acinetobacter_baumannii_1656_2_uid15   | Gammaproteobacter | 0 | 0 | 0  | 0 | 0 |
| Acinetobacter_baumannii_AB0057_uid59   | Gammaproteobacter | 0 | 0 | 0  | 0 | 0 |
| Acinetobacter_baumannii_AB307_0294     | Gammaproteobacter | 0 | 0 | 0  | 0 | 0 |
| Acinetobacter_baumannii_ACICU_uid587   | Gammaproteobacter | 0 | 0 | 0  | 0 | 0 |
| Acinetobacter_baumannii_ATCC_17978     | Gammaproteobacter | 0 | 0 | 0  | 0 | 0 |
| Acinetobacter_baumannii_AYE_uid61637   | Gammaproteobacter | 0 | 0 | 0  | 0 | 0 |
| Acinetobacter_baumannii_BJAB07104      | Gammaproteobacter | 0 | 0 | 0  | 0 | 0 |
| Acinetobacter_baumannii_BJAB0715       | Gammaproteobacter | 0 | 0 | 0  | 0 | 0 |
| Acinetobacter_baumannii_BJAB0868       | Gammaproteobacter | 0 | 0 | 0  | 0 | 0 |
| Acinetobacter_baumannii_D1279779       | Gammaproteobacter | 0 | 0 | 0  | 0 | 0 |
| Acinetobacter_baumannii_MDR_TJ_uid16   | Gammaproteobacter | 0 | 0 | 0  | 0 | 0 |
| Acinetobacter_baumannii_MDR_ZJ06       | Gammaproteobacter | 0 | 0 | 0  | 0 | 0 |
| Acinetobacter_baumannii_SDF_uid61601   | Gammaproteobacter | 0 | 0 | 0  | 0 | 0 |
| Acinetobacter_baumannii_TCDC_AB0715    | Gammaproteobacter | 0 | 0 | 0  | 0 | 0 |
| Acinetobacter_baumannii_TYTH_1_uid17   | Gammaproteobacter | 0 | 0 | 0  | 0 | 0 |
| Acinetobacter_baumannii_ZW85_1_uid2    | Gammaproteobacter | 0 | 0 | 0  | 0 | 0 |
| Acinetobacter_calcoaceticus_PHEA_2     | Gammaproteobacter | 0 | 0 | 0  | 0 | 0 |
| Acinetobacter_oleivorans_DR1_uid50119  | Gammaproteobacter | 0 | 0 | 0  | 0 | 0 |
| Acinetobacter_ADP1_uid61597            | Gammaproteobacter | 0 | 0 | 0  | 0 | 0 |
| Moraxella_catarrhalis_BBH18_uid48809   | Gammaproteobacter | 0 | 0 | 0  | 1 | 0 |
| Psychrobacter_arcticus_273_4_uid58021  | Gammaproteobacter | 0 | 0 | 0  | 1 | 0 |
| Psychrobacter_cryohalolentis_K5_uid583 | Gammaproteobacter | 0 | 0 | 1  | 1 | 0 |
| Psychrobacter_G_uid210641              | Gammaproteobacter | 0 | 0 | 1  | 0 | 0 |
| Psychrobacter_PRwf_1_uid58459          | Gammaproteobacter | 0 | 0 | 19 | 0 | 0 |
| Azotobacter_vinelandii_CA_uid198829    | Gammaproteobacter | 0 | 0 | 5  | 2 | 0 |
| Azotobacter_vinelandii_CA6_uid198830   | Gammaproteobacter | 0 | 0 | 5  | 2 | 0 |
| Azotobacter_vinelandii_DJ_uid57597     | Gammaproteobacter | 0 | 0 | 5  | 2 | 0 |

|                                         |                   |   |   |   |   |   |
|-----------------------------------------|-------------------|---|---|---|---|---|
| Cellvibrio_japonicus_Ueda107_uid59139   | Gammaproteobacter | 0 | 0 | 0 | 0 | 0 |
| Pseudomonas_aeruginosa_B136_33_uid1     | Gammaproteobacter | 0 | 0 | 0 | 0 | 2 |
| Pseudomonas_aeruginosa_DK2_uid16899     | Gammaproteobacter | 0 | 0 | 0 | 2 | 0 |
| Pseudomonas_aeruginosa_LES431_uid23     | Gammaproteobacter | 0 | 0 | 0 | 2 | 0 |
| Pseudomonas_aeruginosa_LESB58_uid59     | Gammaproteobacter | 0 | 0 | 0 | 2 | 0 |
| Pseudomonas_aeruginosa_M18_uid1620      | Gammaproteobacter | 0 | 0 | 0 | 2 | 2 |
| Pseudomonas_aeruginosa_MTB_uid2311      | Gammaproteobacter | 0 | 0 | 0 | 2 | 0 |
| Pseudomonas_aeruginosa_NCGM2_S1_uid     | Gammaproteobacter | 0 | 0 | 0 | 1 | 0 |
| Pseudomonas_aeruginosa_PA1_uid22893     | Gammaproteobacter | 0 | 0 | 0 | 0 | 0 |
| Pseudomonas_aeruginosa_PA1R_uid2289     | Gammaproteobacter | 0 | 0 | 0 | 0 | 0 |
| Pseudomonas_aeruginosa_PA7_uid58627     | Gammaproteobacter | 0 | 0 | 0 | 2 | 0 |
| Pseudomonas_aeruginosa_PAO1_uid5794     | Gammaproteobacter | 0 | 0 | 0 | 2 | 0 |
| Pseudomonas_aeruginosa_RP73_uid2093     | Gammaproteobacter | 0 | 0 | 0 | 2 | 1 |
| Pseudomonas_aeruginosa_SCV20265_uid     | Gammaproteobacter | 0 | 0 | 0 | 0 | 0 |
| Pseudomonas_aeruginosa_UCBPP_PA14_      | Gammaproteobacter | 0 | 0 | 0 | 0 | 0 |
| Pseudomonas_mendocina_NK_01_uid662      | Gammaproteobacter | 0 | 0 | 0 | 1 | 1 |
| Pseudomonas_mendocina_ymp_uid5872       | Gammaproteobacter | 0 | 0 | 0 | 2 | 1 |
| Pseudomonas_resinovorans_NBRC_1065      | Gammaproteobacter | 0 | 0 | 0 | 4 | 0 |
| Pseudomonas_brassicacearum_NFM421_      | Gammaproteobacter | 0 | 0 | 0 | 2 | 0 |
| Pseudomonas_entomophila_L48_uid5863     | Gammaproteobacter | 0 | 0 | 0 | 3 | 0 |
| Pseudomonas_fluorescens_A506_uid165     | Gammaproteobacter | 0 | 0 | 0 | 1 | 0 |
| Pseudomonas_fluorescens_F113_uid8703    | Gammaproteobacter | 0 | 0 | 0 | 3 | 0 |
| Pseudomonas_fluorescens_Pf0_1_uid575    | Gammaproteobacter | 0 | 0 | 0 | 0 | 0 |
| Pseudomonas_fluorescens_SBW25_uid15     | Gammaproteobacter | 0 | 0 | 0 | 4 | 0 |
| Pseudomonas_poaе_RE_1_1_14_uid1884      | Gammaproteobacter | 0 | 0 | 0 | 2 | 0 |
| Pseudomonas_fluorescens_CHA0_uid203     | Gammaproteobacter | 0 | 0 | 0 | 0 | 0 |
| Pseudomonas_fluorescens_Pf_5_uid5793    | Gammaproteobacter | 0 | 0 | 0 | 0 | 0 |
| Pseudomonas_denitrificans_ATCC_13867    | Gammaproteobacter | 0 | 0 | 0 | 2 | 0 |
| Pseudomonas_fulva_12_X_uid67351         | Gammaproteobacter | 0 | 0 | 0 | 3 | 0 |
| Pseudomonas_monteilii_SB3078_uid2322    | Gammaproteobacter | 0 | 0 | 0 | 2 | 0 |
| Pseudomonas_monteilii_SB3101_uid2322    | Gammaproteobacter | 0 | 0 | 0 | 2 | 0 |
| Pseudomonas_putida_BIRD_1_uid162055     | Gammaproteobacter | 0 | 0 | 0 | 3 | 0 |
| Pseudomonas_putida_DOT_T1E_uid1712      | Gammaproteobacter | 0 | 0 | 0 | 1 | 0 |
| Pseudomonas_putida_F1_uid58355          | Gammaproteobacter | 0 | 0 | 0 | 3 | 0 |
| Pseudomonas_putida_GB_1_uid58735        | Gammaproteobacter | 0 | 0 | 0 | 3 | 0 |
| Pseudomonas_putida_H8234_uid208673      | Gammaproteobacter | 0 | 0 | 0 | 4 | 0 |
| Pseudomonas_putida_HB3267_uid18407      | Gammaproteobacter | 0 | 0 | 0 | 4 | 0 |
| Pseudomonas_putida_KT2440_uid57843      | Gammaproteobacter | 0 | 0 | 0 | 2 | 0 |
| Pseudomonas_putida_NBRC_14164_uid2      | Gammaproteobacter | 0 | 0 | 0 | 2 | 0 |
| Pseudomonas_ND6_uid167583               | Gammaproteobacter | 0 | 0 | 0 | 2 | 0 |
| Pseudomonas_putida_S16_uid68747         | Gammaproteobacter | 0 | 0 | 0 | 1 | 0 |
| Pseudomonas_putida_W619_uid58651        | Gammaproteobacter | 0 | 0 | 0 | 2 | 0 |
| Pseudomonas_TKP_uid232248               | Gammaproteobacter | 0 | 0 | 0 | 1 | 0 |
| Pseudomonas_putida_UW4_uid182733        | Gammaproteobacter | 0 | 0 | 0 | 3 | 0 |
| Pseudomonas_VLB120_uid226717            | Gammaproteobacter | 0 | 0 | 0 | 1 | 0 |
| Pseudomonas_stutzeri_A1501_uid58641     | Gammaproteobacter | 0 | 0 | 0 | 1 | 0 |
| Pseudomonas_stutzeri_ATCC_17588__LI     | Gammaproteobacter | 0 | 0 | 0 | 0 | 0 |
| Pseudomonas_stutzeri_CCUG_29243_uid     | Gammaproteobacter | 0 | 0 | 1 | 0 | 0 |
| Pseudomonas_stutzeri_DSM_10701_uid1     | Gammaproteobacter | 0 | 0 | 0 | 4 | 0 |
| Pseudomonas_stutzeri_DSM_4166_uid16     | Gammaproteobacter | 0 | 0 | 0 | 0 | 0 |
| Pseudomonas_stutzeri_RCH2_uid184342     | Gammaproteobacter | 0 | 0 | 0 | 1 | 0 |
| Pseudomonas_syringae_B728a_uid57931     | Gammaproteobacter | 0 | 0 | 0 | 2 | 0 |
| Pseudomonas_syringae_phaseolicola_14    | Gammaproteobacter | 0 | 0 | 0 | 2 | 0 |
| Pseudomonas_syringae_tomato_DC3000      | Gammaproteobacter | 0 | 0 | 0 | 1 | 0 |
| Francisella_noatunensis_orientalis_LADL | Gammaproteobacter | 0 | 0 | 0 | 0 | 0 |
| Francisella_noatunensis_orientalis_Toba | Gammaproteobacter | 0 | 0 | 0 | 0 | 0 |

|                                            |                   |   |   |   |    |   |
|--------------------------------------------|-------------------|---|---|---|----|---|
| Francisella_cf__novicida_3523_uid16210     | Gammaproteobacter | 1 | 0 | 0 | 0  | 0 |
| Francisella_cf__novicida_Fx1_uid162105     | Gammaproteobacter | 0 | 0 | 1 | 1  | 0 |
| Francisella_novicida_U112_uid58499         | Gammaproteobacter | 1 | 0 | 1 | 2  | 0 |
| Francisella_philomiragia_ATCC_25017_uid    | Gammaproteobacter | 0 | 0 | 1 | 2  | 0 |
| Francisella_TX077308_uid68321              | Gammaproteobacter | 0 | 0 | 0 | 0  | 0 |
| Francisella_tularensis_holarctica_F92_uid  | Gammaproteobacter | 0 | 0 | 0 | 0  | 0 |
| Francisella_tularensis_holarctica_FSC200   | Gammaproteobacter | 0 | 0 | 0 | 0  | 0 |
| Francisella_tularensis_holarctica_FTNF00   | Gammaproteobacter | 0 | 0 | 0 | 0  | 0 |
| Francisella_tularensis_holarctica_LVS_uid  | Gammaproteobacter | 1 | 0 | 0 | 0  | 0 |
| Francisella_tularensis_holarctica_OSU18    | Gammaproteobacter | 0 | 0 | 0 | 0  | 0 |
| Francisella_tularensis_mediasiatatica_FSC1 | Gammaproteobacter | 0 | 0 | 0 | 0  | 0 |
| Francisella_tularensis_FSC198_uid58693     | Gammaproteobacter | 0 | 0 | 0 | 0  | 0 |
| Francisella_tularensis_NE061598_uid161     | Gammaproteobacter | 0 | 0 | 0 | 0  | 0 |
| Francisella_tularensis_SCHU_S4_uid5758     | Gammaproteobacter | 0 | 0 | 0 | 0  | 0 |
| Francisella_tularensis_TI0902_uid89373     | Gammaproteobacter | 0 | 0 | 0 | 0  | 0 |
| Francisella_tularensis_TIGB03_uid89379     | Gammaproteobacter | 0 | 0 | 0 | 0  | 0 |
| Francisella_tularensis_WY96_3418_uid58     | Gammaproteobacter | 1 | 0 | 0 | 0  | 0 |
| Cycloclasticus_P1_uid176368                | Gammaproteobacter | 0 | 0 | 0 | 2  | 0 |
| Cycloclasticus_zancles_7_ME_uid214092      | Gammaproteobacter | 0 | 0 | 0 | 3  | 0 |
| Methylophaga_JAM7_uid162949                | Gammaproteobacter | 0 | 0 | 0 | 1  | 0 |
| Methylophaga_JAM1_uid162947                | Gammaproteobacter | 0 | 0 | 0 | 0  | 0 |
| Thioalkalimicrobium_cyclicum_ALM1_uid      | Gammaproteobacter | 0 | 0 | 0 | 0  | 0 |
| Thiomicrospira_crunogena_XCL_2_uid58       | Gammaproteobacter | 0 | 0 | 0 | 0  | 0 |
| Baumannia_cicadellinicola_Hc__Homalod      | Gammaproteobacter | 0 | 0 | 0 | 0  | 0 |
| Candidatus_Carsonella_ruddii_CE_isolate    | Gammaproteobacter | 0 | 0 | 0 | 0  | 0 |
| Candidatus_Carsonella_ruddii_CS_isolate    | Gammaproteobacter | 0 | 0 | 0 | 0  | 0 |
| Candidatus_Carsonella_ruddii_DC_uid213     | Gammaproteobacter | 0 | 0 | 0 | 0  | 0 |
| Candidatus_Carsonella_ruddii_HT_isolate    | Gammaproteobacter | 0 | 0 | 0 | 0  | 0 |
| Candidatus_Carsonella_ruddii_PC_isolate    | Gammaproteobacter | 0 | 0 | 0 | 0  | 0 |
| Candidatus_Carsonella_ruddii_uid58773      | Gammaproteobacter | 0 | 0 | 0 | 0  | 0 |
| Candidatus_Carsonella_ruddii_HC_isolate    | Gammaproteobacter | 0 | 0 | 0 | 0  | 0 |
| Simiduia_agarivorans_SA1_uid177713         | Gammaproteobacter | 0 | 0 | 0 | 3  | 0 |
| Candidatus_Vesicomysocius_okutanii_H       | Gammaproteobacter | 0 | 0 | 0 | 0  | 0 |
| Candidatus_Ruthia_magnifica_Cm__Calyx      | Gammaproteobacter | 0 | 0 | 0 | 0  | 0 |
| gamma_proteobacterium_HdN1_uid5163         | Gammaproteobacter | 1 | 0 | 6 | 3  | 0 |
| Vibrio_fischeri_ES114_uid58163             | Gammaproteobacter | 0 | 0 | 0 | 0  | 0 |
| Vibrio_fischeri_MJ11_uid58907              | Gammaproteobacter | 0 | 0 | 0 | 0  | 0 |
| Aliivibrio_salmonicida_LFI1238_uid59251    | Gammaproteobacter | 0 | 0 | 0 | 0  | 0 |
| Photobacterium_profundum_SS9_uid629        | Gammaproteobacter | 0 | 0 | 0 | 28 | 0 |
| Listonella_anguillarum_M3_uid217771        | Gammaproteobacter | 0 | 0 | 0 | 0  | 0 |
| Vibrio_anguillarum_775_uid68057            | Gammaproteobacter | 0 | 0 | 0 | 0  | 0 |
| Vibrio_cholerae_LMA3984_4_uid159541        | Gammaproteobacter | 0 | 0 | 0 | 1  | 0 |
| Vibrio_cholerae_M66_2_uid59355             | Gammaproteobacter | 0 | 0 | 0 | 4  | 0 |
| Vibrio_cholerae_IEC224_uid89389            | Gammaproteobacter | 0 | 0 | 0 | 4  | 0 |
| Vibrio_cholerae_MJ_1236_uid59387           | Gammaproteobacter | 0 | 0 | 0 | 4  | 0 |
| Vibrio_cholerae_O1_biovar_EI_Tor_N169      | Gammaproteobacter | 0 | 0 | 0 | 4  | 0 |
| Vibrio_cholerae_O1_2010EL_1786_uid78       | Gammaproteobacter | 0 | 0 | 0 | 4  | 0 |
| Vibrio_cholerae_O395_uid58425              | Gammaproteobacter | 0 | 0 | 0 | 7  | 0 |
| Vibrio_cholerae_O395_uid159869             | Gammaproteobacter | 0 | 0 | 0 | 7  | 0 |
| Vibrio_furnissii_NCTC_11218_uid82347       | Gammaproteobacter | 0 | 0 | 0 | 0  | 0 |
| Vibrio_alginolyticus_NBRC_15630__ATC       | Gammaproteobacter | 0 | 0 | 0 | 9  | 0 |
| Vibrio_harveyi_ATCC_BAA_1116_uid2184       | Gammaproteobacter | 0 | 0 | 0 | 0  | 0 |
| Vibrio_harveyi_ATCC_BAA_1116_uid5895       | Gammaproteobacter | 0 | 0 | 0 | 0  | 0 |
| Vibrio_paraahaemolyticus_BB22OP_uid18      | Gammaproteobacter | 0 | 0 | 0 | 0  | 0 |
| Vibrio_paraahaemolyticus_O1_K33_CDC_K      | Gammaproteobacter | 4 | 0 | 0 | 0  | 0 |
| Vibrio_paraahaemolyticus_RIMD_2210633      | Gammaproteobacter | 0 | 0 | 0 | 0  | 0 |

|                                         |                   |   |   |   |   |   |
|-----------------------------------------|-------------------|---|---|---|---|---|
| Vibrio_nigripulchritudo_SnF1_uid222819  | Gammaproteobacter | 0 | 0 | 0 | 0 | 0 |
| Vibrio_EJY3_uid83161                    | Gammaproteobacter | 0 | 0 | 0 | 0 | 0 |
| Vibrio_Ex25_uid41601                    | Gammaproteobacter | 0 | 0 | 0 | 0 | 0 |
| Vibrio_splendidus_LGP32_uid59353        | Gammaproteobacter | 0 | 0 | 0 | 0 | 0 |
| Vibrio_vulnificus_CMCP6_uid62909        | Gammaproteobacter | 0 | 0 | 0 | 0 | 0 |
| Vibrio_vulnificus_MO6_24_O_uid62243     | Gammaproteobacter | 0 | 0 | 0 | 0 | 0 |
| Vibrio_vulnificus_YJ016_uid58007        | Gammaproteobacter | 0 | 0 | 0 | 0 | 0 |
| Frateuria_aurantia_DSM_6220_uid81775    | Gammaproteobacter | 0 | 0 | 0 | 0 | 0 |
| Pseudoxanthomonas_spadix_BD_a59_uid     | Gammaproteobacter | 0 | 0 | 0 | 4 | 0 |
| Pseudoxanthomonas_suwonensis_11_1_1     | Gammaproteobacter | 0 | 0 | 0 | 3 | 0 |
| Rhodanobacter_2APBS1_uid74431           | Gammaproteobacter | 0 | 0 | 0 | 5 | 0 |
| Stenotrophomonas_maltophilia_D457_uid   | Gammaproteobacter | 0 | 0 | 0 | 3 | 0 |
| Stenotrophomonas_maltophilia_JV3_uid7   | Gammaproteobacter | 0 | 0 | 0 | 5 | 0 |
| Stenotrophomonas_maltophilia_K279a_u    | Gammaproteobacter | 0 | 0 | 0 | 4 | 0 |
| Stenotrophomonas_maltophilia_R551_3_    | Gammaproteobacter | 0 | 0 | 0 | 5 | 0 |
| Xanthomonas_albilineans_GPE_PC73_uid    | Gammaproteobacter | 0 | 0 | 0 | 0 | 0 |
| Xanthomonas_axonopodis_citrumelo_F1_    | Gammaproteobacter | 0 | 0 | 0 | 1 | 0 |
| Xanthomonas_axonopodis_Xac29_1_uid1     | Gammaproteobacter | 0 | 0 | 0 | 1 | 0 |
| Xanthomonas_campestris_8004_uid5759     | Gammaproteobacter | 0 | 0 | 0 | 1 | 0 |
| Xanthomonas_campestris_ATCC_33913_1     | Gammaproteobacter | 0 | 0 | 0 | 1 | 0 |
| Xanthomonas_campestris_uid61643         | Gammaproteobacter | 0 | 0 | 0 | 2 | 0 |
| Xanthomonas_campestris_raphani_756C_    | Gammaproteobacter | 0 | 0 | 0 | 2 | 0 |
| Xanthomonas_axonopodis_citri_306_uid5   | Gammaproteobacter | 0 | 0 | 0 | 1 | 0 |
| Xanthomonas_citri_Aw12879_uid194444     | Gammaproteobacter | 0 | 0 | 1 | 1 | 0 |
| Xanthomonas_campestris_vesicatoria_85   | Gammaproteobacter | 0 | 0 | 0 | 3 | 0 |
| Xanthomonas_oryzae_KACC_10331_uid51     | Gammaproteobacter | 0 | 0 | 0 | 1 | 0 |
| Xanthomonas_oryzae_MAFF_311018_uid      | Gammaproteobacter | 0 | 0 | 0 | 1 | 0 |
| Xanthomonas_oryzae_PXO99A_uid59131      | Gammaproteobacter | 0 | 0 | 0 | 1 | 0 |
| Xanthomonas_oryzae_oryzicola_BLS256_    | Gammaproteobacter | 0 | 0 | 0 | 1 | 0 |
| Xylella_fastidiosa_9a5c_uid57849        | Gammaproteobacter | 0 | 0 | 1 | 0 | 4 |
| Xylella_fastidiosa_M12_uid58763         | Gammaproteobacter | 0 | 0 | 3 | 0 | 4 |
| Xylella_fastidiosa_M23_uid58809         | Gammaproteobacter | 0 | 0 | 3 | 1 | 1 |
| Xylella_fastidiosa_GB514_uid162023      | Gammaproteobacter | 0 | 0 | 2 | 0 | 2 |
| Xylella_fastidiosa_Temecula1_uid57869   | Gammaproteobacter | 0 | 0 | 0 | 0 | 0 |
| Brachyspira_hydysenteriae_WA1_uid591    | Spirochaetes      | 0 | 0 | 0 | 0 | 1 |
| Brachyspira_intermedia_PWS_A_uid1583    | Spirochaetes      | 0 | 0 | 0 | 0 | 1 |
| Brachyspira_murdochii_DSM_12563_uid4    | Spirochaetes      | 0 | 0 | 0 | 0 | 1 |
| Brachyspira_pilosicoli_95_1000_uid50609 | Spirochaetes      | 0 | 0 | 0 | 0 | 0 |
| Brachyspira_pilosicoli_B2904_uid175255  | Spirochaetes      | 0 | 0 | 0 | 0 | 0 |
| Brachyspira_pilosicoli_P43_6_78_uid1840 | Spirochaetes      | 0 | 0 | 0 | 0 | 0 |
| Brachyspira_pilosicoli_WesB_uid175256   | Spirochaetes      | 0 | 0 | 0 | 0 | 0 |
| Leptospira_biflexa_serovar_Patoc__Patoc | Spirochaetes      | 0 | 0 | 0 | 0 | 0 |
| Leptospira_biflexa_serovar_Patoc__Patoc | Spirochaetes      | 0 | 0 | 0 | 0 | 0 |
| Leptospira_borgpetersenii_serovar_Hardj | Spirochaetes      | 0 | 0 | 0 | 0 | 0 |
| Leptospira_borgpetersenii_serovar_Hardj | Spirochaetes      | 0 | 0 | 0 | 0 | 0 |
| Leptospira_interrogans_serovar_Copenhag | Spirochaetes      | 0 | 0 | 0 | 0 | 0 |
| Leptospira_interrogans_serovar_Lai_566C | Spirochaetes      | 0 | 0 | 0 | 0 | 0 |
| Leptospira_interrogans_serovar_Lai_IPAV | Spirochaetes      | 0 | 0 | 0 | 0 | 0 |
| Turneriella_parva_DSM_21527_uid16832    | Spirochaetes      | 0 | 0 | 0 | 3 | 0 |
| Borrelia_afzelii_HLJ01_uid177930        | Spirochaetes      | 0 | 0 | 0 | 0 | 0 |
| Borrelia_afzelii_PKo_uid58653           | Spirochaetes      | 0 | 0 | 2 | 0 | 0 |
| Borrelia_afzelii_PKo_uid159867          | Spirochaetes      | 0 | 0 | 3 | 1 | 0 |
| Borrelia_garinii_PBi_uid58125           | Spirochaetes      | 0 | 0 | 0 | 0 | 0 |
| Borrelia_bissettii_DN127_uid71231       | Spirochaetes      | 0 | 0 | 1 | 0 | 0 |
| Borrelia_burgdorferi_B31_uid57581       | Spirochaetes      | 0 | 0 | 0 | 0 | 0 |
| Borrelia_burgdorferi_CA382_uid214794    | Spirochaetes      | 0 | 0 | 0 | 0 | 0 |



|                                       |                    |   |   |   |    |   |
|---------------------------------------|--------------------|---|---|---|----|---|
| Borrelia_burgdorferi_JD1_uid161197    | Spirochaetes       | 0 | 0 | 2 | 0  | 0 |
| Borrelia_burgdorferi_N40_uid161241    | Spirochaetes       | 0 | 0 | 3 | 0  | 0 |
| Borrelia_burgdorferi_ZS7_uid59429     | Spirochaetes       | 0 | 0 | 0 | 0  | 0 |
| Borrelia_garinii_BgVir_uid162165      | Spirochaetes       | 0 | 0 | 0 | 0  | 0 |
| Borrelia_garinii_NMJW1_uid177081      | Spirochaetes       | 0 | 0 | 0 | 0  | 0 |
| Borrelia_crociduræ_Achema_uid162335   | Spirochaetes       | 0 | 0 | 2 | 2  | 0 |
| Borrelia_duttonii_Ly_uid58791         | Spirochaetes       | 0 | 0 | 5 | 1  | 0 |
| Borrelia_hermsii_DAH_uid59225         | Spirochaetes       | 0 | 0 | 0 | 0  | 0 |
| Borrelia_miyamotoi_LB_2001_uid215233  | Spirochaetes       | 0 | 0 | 0 | 0  | 0 |
| Borrelia_recurrentis_A1_uid58793      | Spirochaetes       | 0 | 0 | 1 | 1  | 0 |
| Borrelia_turicatae_91E135_uid58311    | Spirochaetes       | 0 | 0 | 0 | 0  | 0 |
| Spirochaeta_coccoides_DSM_17374_uid6  | Spirochaetes       | 0 | 0 | 2 | 0  | 2 |
| Spirochaeta_Buddy_uid63633            | Spirochaetes       | 1 | 0 | 0 | 1  | 0 |
| Sphaerochaeta_pleomorpha_Grapes_uid6  | Spirochaetes       | 0 | 0 | 0 | 1  | 0 |
| Spirochaeta_africana_DSM_8902_uid817  | Spirochaetes       | 0 | 0 | 0 | 0  | 0 |
| Spirochaeta_smaragdinae_DSM_11293_uid | Spirochaetes       | 0 | 0 | 0 | 0  | 0 |
| Spirochaeta_thermophila_DSM_6192_uid  | Spirochaetes       | 0 | 0 | 0 | 0  | 0 |
| Spirochaeta_thermophila_DSM_6578_uid  | Spirochaetes       | 0 | 0 | 0 | 0  | 0 |
| Treponema_azotonutricium_ZAS_9_uid67  | Spirochaetes       | 0 | 0 | 0 | 0  | 0 |
| Treponema_brennaborensense_DSM_12168  | Spirochaetes       | 0 | 0 | 0 | 0  | 1 |
| Spirochaeta_caldaria_DSM_7334_uid687  | Spirochaetes       | 0 | 0 | 0 | 0  | 0 |
| Treponema_denticola_ATCC_35405_uid5   | Spirochaetes       | 1 | 0 | 0 | 0  | 0 |
| Treponema_pallidum_Fribourg_Blanc_uid | Spirochaetes       | 0 | 0 | 0 | 0  | 0 |
| Treponema_pallidum_DAL_1_uid87065     | Spirochaetes       | 0 | 0 | 0 | 0  | 0 |
| Treponema_pallidum_SS14_uid58977      | Spirochaetes       | 0 | 0 | 0 | 0  | 0 |
| Treponema_pallidum_Chicago_uid15954   | Spirochaetes       | 0 | 0 | 0 | 0  | 0 |
| Treponema_pallidum_Mexico_A_uid1769   | Spirochaetes       | 0 | 0 | 0 | 0  | 0 |
| Treponema_pallidum_Nichols_uid208669  | Spirochaetes       | 0 | 0 | 0 | 0  | 0 |
| Treponema_pallidum_Nichols_uid57585   | Spirochaetes       | 0 | 0 | 0 | 0  | 0 |
| Treponema_pallidum_pertenuis_CDC2_uid | Spirochaetes       | 0 | 0 | 0 | 0  | 0 |
| Treponema_pallidum_pertenuis_Gauthier | Spirochaetes       | 0 | 0 | 0 | 0  | 0 |
| Treponema_pallidum_pertenuis_Samoa    | Spirochaetes       | 0 | 0 | 0 | 0  | 0 |
| Treponema_paraluiscuniculi_Cuniculi_A | Spirochaetes       | 0 | 0 | 0 | 0  | 0 |
| Treponema_pedis_T_A4_uid215715        | Spirochaetes       | 1 | 0 | 0 | 0  | 0 |
| Treponema_primitia_ZAS_2_uid67367     | Spirochaetes       | 0 | 0 | 0 | 2  | 0 |
| Treponema_succinifaciens_DSM_2489_uid | Spirochaetes       | 0 | 0 | 0 | 0  | 0 |
| Aminobacterium_colombiense_DSM_122    | Synergistetes      | 0 | 0 | 0 | 1  | 0 |
| Anaerobaculum_mobile_DSM_13181_uid    | Synergistetes      | 0 | 0 | 0 | 1  | 0 |
| Synergistetes_bacterium_SGP1_uid19718 | Synergistetes      | 0 | 0 | 0 | 0  | 0 |
| Thermanaerovibrio_acidaminovorans_DS  | Synergistetes      | 0 | 0 | 0 | 0  | 0 |
| Thermovirga_lienii_DSM_17291_uid7712  | Synergistetes      | 0 | 0 | 2 | 1  | 0 |
| Thermodesulfatator_indicus_DSM_15286  | Thermodesulfobacte | 0 | 0 | 0 | 17 | 0 |
| Thermodesulfobacterium_OPB45_uid682   | Thermodesulfobacte | 0 | 0 | 0 | 1  | 0 |
| Fervidobacterium_nodosum_Rt17_B1_uid  | Thermotogae        | 0 | 0 | 1 | 0  | 0 |
| Fervidobacterium_pennivorans_DSM_907  | Thermotogae        | 0 | 0 | 1 | 0  | 0 |
| Kosmotoga_olearia_TBF_19_5_1_uid592   | Thermotogae        | 0 | 0 | 0 | 2  | 0 |
| Marinitoga_piezophila_KA3_uid81629    | Thermotogae        | 0 | 0 | 0 | 0  | 0 |
| Mesotoga_prima_MesG1_Ag_4_2_uid52     | Thermotogae        | 0 | 0 | 0 | 1  | 0 |
| Petrotoga_mobilis_SJ95_uid58747       | Thermotogae        | 0 | 3 | 5 | 0  | 0 |
| Thermosiphon_africanus_TCF52B_uid5909 | Thermotogae        | 0 | 1 | 4 | 3  | 0 |
| Thermosiphon_melanesiensis_BI429_uid5 | Thermotogae        | 0 | 0 | 0 | 0  | 0 |
| Thermotoga_lettingae_TMO_uid58419     | Thermotogae        | 0 | 3 | 2 | 1  | 0 |
| Thermotoga_maritima_MSB8_uid179902    | Thermotogae        | 0 | 0 | 8 | 3  | 0 |
| Thermotoga_maritima_MSB8_uid202924    | Thermotogae        | 0 | 0 | 9 | 3  | 0 |
| Thermotoga_maritima_MSB8_uid57723     | Thermotogae        | 0 | 0 | 9 | 3  | 0 |
| Thermotoga_naphthophila_RKU_10_uid4   | Thermotogae        | 0 | 0 | 7 | 4  | 0 |

|                                         |                       |   |   |   |   |   |
|-----------------------------------------|-----------------------|---|---|---|---|---|
| Thermotoga_neapolitana_DSM_4359_uid     | Thermotogae           | 0 | 0 | 5 | 0 | 0 |
| Thermotoga_petrophila_RKU_1_uid5865!    | Thermotogae           | 0 | 0 | 6 | 2 | 0 |
| Thermotoga_RQ2_uid58935                 | Thermotogae           | 0 | 0 | 8 | 3 | 0 |
| Thermotoga_thermarum_DSM_5069_uid       | Thermotogae           | 0 | 0 | 0 | 0 | 0 |
| Candidatus_Methylomirabilis_oxyfera_uic | unclassified Bacteria | 0 | 0 | 0 | 2 | 1 |
| candidate_division_SR1_bacterium_RAAC   | unclassified Bacteria | 0 | 0 | 0 | 0 | 0 |
| candidate_division_WWE3_bacterium_RA    | unclassified Bacteria | 0 | 0 | 0 | 0 | 0 |
| Candidatus_Saccharibacteria_bacterium_  | unclassified Bacteria | 0 | 0 | 0 | 2 | 0 |
| Candidatus_Saccharobacterium_alaburge   | unclassified Bacteria | 0 | 0 | 0 | 0 | 0 |
| Candidatus_Cloacamonas_acidaminovora    | unclassified Bacteria | 0 | 0 | 0 | 3 | 0 |
| Thermobaculum_terrenum_ATCC_BAA_7       | unclassified Bacteria | 0 | 0 | 0 | 0 | 1 |
| Halyomorpha_halys_symbiont_uid222821    | unclassified Bacteria | 0 | 0 | 0 | 0 | 0 |

### Supplementary Table 3

Note : Only hits with Probability (Prpbab) >50% indicated

| GI number                                                                                       | 297550215                             | 297547772                               | 71910582                              | 750144021                                              |
|-------------------------------------------------------------------------------------------------|---------------------------------------|-----------------------------------------|---------------------------------------|--------------------------------------------------------|
| <b>Protein</b>                                                                                  | <b>IscB2</b>                          | <b>IscB1</b>                            | <b>Cas9</b>                           | <b>TnpB</b>                                            |
| <b>Organism</b>                                                                                 | Ktedonobacter<br>racemifer DSM<br>493 | Ktedonobacter<br>racemifer DSM<br>44963 | Streptococcus<br>pyogenes<br>MGAS5005 | Ktedonobacter<br>racemifer DSM<br>44963                |
| <b>pfam14239<br/>RRXRR, RRXRR<br/>protein</b>                                                   | Probab=100%;<br>Score=573             | Probab=100%;<br>Score=573               | Probab=74%;<br>Score=46               | Probab=52%;<br>Score=30                                |
| <b>cd09643, Csn1<br/>(Cas9)</b>                                                                 | Probab=99.67<br>%; Score=177          | Probab=99.67%;<br>Score=177             | Probab=100%;<br>Score=1537            | n/a                                                    |
| <b>pfam02075, RuvC</b>                                                                          | Probab=92%;<br>Score=41               | Probab=92%;<br>Score=41                 | n/a                                   | n/a                                                    |
| <b>cd00529,<br/>RuvC_resolvase,<br/>Holliday junction<br/>resolvases</b>                        | n/a                                   | n/a                                     | n/a                                   | Probab=92%;<br>Score=35                                |
| <b>pfam01385<br/>OrfB_IS605<br/>COG0675<br/>Transposase and<br/>inactivated<br/>derivatives</b> | n/a                                   | n/a                                     | n/a                                   | Probab=100%;<br>Score=195<br>Probab=100%;<br>Score=310 |

**Supplemental Figure 1. DNA (IG format) and protein (Fasta format) sequences of all new transposons reported in the manuscript.**

```
; Ktedonobacter racemifer DSM 44963; 7 copies, ~99% identical to the consensus
; This transposon is inserted at the GT|GG target site (no target site duplications)
; Palindrome at pos 7-27: CCCCATGCCTAAAGGCAGGG
;
;          =====> <=====
; Palindrome in the 3' terminus at pos 1531-1580:
;tail 1531                                          1580
; Q: TGCGCCATGCTCCTCCCATGGCTAAAGCCAGGGGTCCCCGCATGGCGCA
;   ||| ||| ||| ||| ||| ||| ||| ||| ||| ||| ||| ||| |||
; S: TGCGCCATGCGGGGACCCCTGGCTTTAGCCATGGGGAGGAGCATGGCGCA
ISC2-1_KR
```

```
CAGGTACCCCATGCCTAAAGGCAGGGGCTTGTGAAAGCAAGCTCGGACCTGTCCAGACTT
AGCCATGGGCCTTCTGCGCGAGGCAGGAGGTTATCAGGCTACGATAGAGGAGAAAGTGTTC
AAGTTCCTACCTACAGGTGCGTGCCAGCCGGTAGCTCTAGAATCTCTGGGTAAACAGCA
AAGCGGGGTCTATGCAGTGCTCAGGGAAAAGTACCGCCCTCTATCATTGTTCGAGGCAAAC
ATTACCCTGGAAACAGGAGGCTCAACGTGAGCAATGTTTTTGTGATTGATAGTGACTATA
AACCTTTAAATCCGGTGCATCCAGGACACGCGAGGCGCTTGCTCAGGCAAGGGAAAGCAG
CCGTGTTTAGACGGTATCCGTTTACCATTGTGCTCAAACGGGTGGTAGAACAGCCAGAGG
TACAACCCTTGCACCTCAAGCTCGATCCAGGCAGTAAACGACGGGAATTGCCCTGGTGA
ACGACACCAACGGCAAATTTGTGTTGCGGGCTGAACTCTCACATCGAGGGCATGCAATTA
AAGACAGTCTTGATAGTCGTCGTGCAAGTCGCCAGGGCGTAGGCAGCGTAAAAACAGCT
ACCGCAAGCCGCGATTTGACAATCGACGGAGGAAGAAGGGATGGTTGCCACCATCGTTAG
AAAGTCGCCTTGCCAACATTCTGACGTGGGTAGCTCGCCTGTGTCGATATGCTCCATTG
CCACTCTCAGTCAGGAGCTTGTGAAGTTTGATATGCAATTGATGGAGAATCCCGACATTG
CAGGTGTGGAATACCAGCAAGGAACCTTGAAGGCTATGAGGTCAGGGAATACTTGCTGG
AAAAATGGGAACGCACGTGTGCCTATTGTGGCAAAACAAGATGTCCCGCTTCAGGTAGAGC
ATATCCATCCACGTGCCCCTAGTGGTACGAACAGGATGAGCAATCTTACCTTGGCGTGCG
AAGCATGCAATACTGCCAAAGGCACTCAGGAGATCGAAGTCTTCTTGAAAAAGAAACCTG
ACGTGCTCAAGCGTCTTCTCGCTCAGGTCAAAAAGCCACTCAAGGATGCCAGCGCTGTCA
ATAGCACACGATGTGCTTTGCTCGAACGGCTGAAAGCTCTCGGCTTGCCTGTGAGTGTG
GGAGCGGTGGATTGACGAAGTTTAATCGTACCACGCGAGGACTCCCCAAAACCCACTGGC
TCGATGCAGCTTTCGTTAGGCAAGAGCACGCCTGATGTGCTTTTGCAGAAGGGAGTCATCC
CACTGCGCATCAAAGCGACAGGGCATGGGAGGAGGCAAATGTGTGTGCTGACAAGTATG
GATTTCCGAAGCAGCACAAAGAGCGCAAAAGACATTTCTTGGGTATCAAACGGGTGATC
TGGTCAAAGCCATCACGCCCCAAAGGAACATTTGAAGGACGGATAGCCATTTCGTCATCGGC
CTTCATTCCGACTGGAGAAGGTGATATTCACCCCAAATATATGCGTTGTGTGCAACGAT
CCGATGGCTATGAGTATACACAGAAAGGAGTGCGCCATGCTCCTCCCATGGCTAAAGCC
AGGGGTCCCCGCATGGCGCAATTTTTAGAT
```

```
; Ktedonobacter_racemifer_DSM_44963; 3 copies, 99% identical to the consensus
; This transposon is inserted into the GT|GA target site (no duplications).
; Palindrome at pos 7-27: CCCCGGTTTGAAAACCGGG
;
;          =====> <=====
```

```
; Palindrome at pos 1533-1578:
;tail 1533                                          1578
; Q: CGCCATGCTCCTCCCATGGCTAAAGCCAGGGGTCCCCGCATGGCG
;   ||| ||| ||| ||| ||| ||| ||| ||| ||| ||| ||| ||| |||
; S: CGCCATGCGGGGACCCCTGGCTTTAGCCATGGGGAGGAGCATGGCG
ISC2-2_KR
```

```
CATGGACCCCGGTTTGAAAACCGGGGCTTGCAAGAAGTTTGAACGCTTCTTGTAACCCCAACGGTTGGC
AAGCTGAAACATGACCAGATCCAGCCACCGCTCTTCTTCGGAGGAGCGATGGGGCTACGTTATCAGGAAG
TGTCAACGTTTCGTACCGGAGGATGCGCGGCCAGTCTTCCGCTCTACAACCAGCAGGTTAAACAGACCGTG
GGTATAGTCAGTGCTTGTGATGTACC GCCTGATAACATCATCGAGGCCACCATCACCCGAGCAATCGG
AGGCTCTGAAAGGAGCAAGCACATGAGCCACGTTTTTGTTCATCGATGCCAACAAGCAACCGCTCAATCCG
GTCCATCCTGCAAGGGCACGCGTATTGCTCTCGCAAGGGAAGGCGGCGAGTACTGAAACGCTTTCTTTTA
CCATCATCCTCAACGTTGCGATAGATGCTCCAGTCGTTGAAGAACTGCGGATCAAGATTGACCCAGGCTC
AAAGACCACAGGCATAGCTCTCGTCAACGACACAGTCCGGTGAAGTCTGCTTTTTCGGCTGAACTCCATCAT
CGTGGAGCAAAGATCAAAGAGGCGCTCGATGATCGAAGAGCCGTCAGATATTCACGACGCCGACGCCATA
```

CACGCTACAGAAAAGCGAGATGGCAGAATCGGAGGCGACGCGAGGGCTGGTTGCCGCCATCGCTTACTAG  
CAGGATCAGCAATGTACTGACCTGGGTGAAGCGTCTGCGCAACCTTTGCCCGATCACAGCAATGAGCATG  
GAGCTCGTGAAGTTTGATATGCAAGCGATGGAGAACCCCGATATCCAGGGATGGGAGTATCAACAAGGCA  
CACTGGCAGGCTATGAACTCCGTGAGTACCTGCTAGAGAAGTGAACCGAATGTGCGCGTATTGCGGCAA  
GGGCAATGTCCCTTTGCAAGTGGAGCACATTGTGCCCTCGTGCCAACAAGGGCACGCATCGCGTCAGTAAC  
TTGACGCTCGCATGCGAGAAGTGTAAACCAGGCCAAGGGAAACCCAGGACATCAAAGACTTTCTCAAGAAGA  
AACCAGCGATGCTCAAGCACATTCTTGCTCAGGCCAAAAGCCCCGCTCAACGATGCCGCAGCGGTCAATGC  
CACCCGTTGGGAGTTGTTTCAGAGGGCTACAAGCGTTAGGGCTGCCAATCGAATGTGGTTCTGGCGGGTTA  
ACGAAGTACAACAGGACGACACGTGAGCTTCCAAAAACGCACTGGATAGACGCGGCGTGTGTTCGGTCAGA  
GCACTCCTGAGTACCTGAACACCACAGGGATCTCTTCTTGCTGATCACGGCGACGGGCTATGGCAAGAG  
ACAACGTGTGGCGTAGATAAGCATGGTTTTCTCAGCGCCATCGACAACGCAAAAAGGTGCATCATGGG  
TATCAGACGGGCGATCTGGTGCAGGCGGTAGTACCAGAGGGATTTGCGGCAGCGGGGAGACATGTGGGGC  
GCGTCTTAGCACGAGCAACGGGATCGTTTTGATCTGAGAACCGCACGTGGGCGCATAGAAGGAGTCCCTGT  
GCGCTATTGTCGTCCTCTTCATCGCAATGATGGATATAGCTACCACAGCACGAGAGGCGGCAATTCCTCC  
CCGCTCTAAAGAGGCGGGGCTTCCCTGCGCTTCTCTGT

; Ktedonobacter racemifer DSM 44963; two 91% identical copies  
; This transposon is inserted into GT|GA target (no duplications)  
; Common ends with IS605B-3\_KR  
; Terminal palindromes:

; head 8 28  
; Q: CCCACGCATGAATGCGGGG  
; |||-|||| | ||| |  
; S: CCC-CGCATTCATGCGTGG  
;  
; tail 1661 1680  
; Q: CCCATGGGTGAACCCAGGG  
; ||| |||| | |||| |  
; S: CCCCTGGGTTACCCATGG

ISC2-3\_KR

CAACGATCCCCACGCATGAATGCGGGGCTTGTCCTTGTGTTGATGCCGTCTTCGTTGTCCAGCCGAGG  
TACCAGAGCCCGCAGGCAAGGCGCTGATTGGTACCAGCGTTGCGCTCGTACGACACCTCGTTGTGCTTC  
CTCAGCAGCGAGCGCTGTGCTCAGCGTAAAAGCACCCGTCGGGGTACGGGTGGTGCCTGAGCCGAA  
CAAGCGAGAGCAACACCGGCGAGGGGAGCGTCTGAGTCAGCCTGCTCAGGACCGTTACACAGCCCGGTA  
ACGGGGCCCTCACACGAGGGAAACGAAAGGAGTCACCCATGGTGTGTTGTGCTCGACAGATAAAAAAGCC  
GCTCATGCCCTGTACCCCCAGACGTGCACGCCTCTGCTCGCACGCAAGCGGGCGGTGGTCCACCGGCTC  
AGCCCCTTACGATCCGTCTCAAGGACCGCAGCGTCCAGCAGAGCACGCTGCAACCGGTGGCGCTCAAGA  
TCGATCCTGGCGCAAAAACCACGGGCTGGCCCTGGCGCGGGTGGAGGAGACCAGCGAGGGAGAGGTGCA  
CCACGCGCTGCACCTGGCCGAACCTCTCCACCGAGGAGAGGAGGTCCGCGACCGACTGCGCAAACGGGCC  
GGTATCGACGCCGAGGCGTTTCGACCAACCTGCGCTATCGGCCGCGCGCTTCTCAACCGCGCTCGAG  
CGCCTGGCTGGCTCCCGCGTCCCTGCGCTCACGCATCGACAATGTCCTGTCCTGGGCGAGGCGCTATCA  
GCGCTGGGTTCCGCTGGTGCAGCATGCGGTGGAGCGCGTGAAGTTCGACACGCAGCTCTTGCAACA  
GAGATCTCCGGGTCGAGTACCAGCGCGGGAACTGGCCGTTGGGAAGTGCAGGCCTATCTCCTGGAGA  
AGTTCGGGCGCAGGTGCGTGTACTGCGGGCGCACGGACACGCCCTTCGAGTTGGACCATATCCAGCCGCG  
CAGTCGGGTTGGTTCCAACCGCGTTCGAATCTGGCGCTCAGTTGCCACACGTGCAATGCCGCCAAGGGG  
GAGCGCACCGCCCGGAGTTTCGGCCATCCCGAAGTGGCCGCCAGGCGAAGCAGCCGTTGCGGGACACGG  
CGGCGGTCAACGCCACCCGCTACGCGTCTGTGACGAACTGCGCACGCTGGACCTGCCGCTACCACCTG  
GAGCGGCGGACGCACGAGATGGAACCGGGCGCGCTTCTCGATCCCCAAGACGCACGCGCTGGATGCCCTG  
TGCGTGGGGGAGGTGGCGGGAGTCAAGGTGGGTGCGCACAGGCCCCGGCCATCACAGCCACGGGTCGGG  
GTGCTACAGCCGCACGAATGTGACGAGTCGGGCTTTCCGGTTGGCTCCTTGATGCGCCGCAAGCAGGT  
CCTGGGAATCAAAAACGGGGACCGGTTGCGGGCCATGGTTCCGGAAGGGTTTGCGGCGCAGGGGACCCAT  
ACCGGCGCATCGCCGTGCGCGCAACAAGCACTTTCGCATGGCAAGGTGCAGGGGATTCCTGCGCGAT  
TTTGCCGGGTGCTCCAACCTGGCCGACGGCTACGACTATGCTGTGGTGGCAACGACCTTGCAGGGATGACG  
GACCGAGGAGCCCCCTCCCCTGCCACCAGGAAAGGAACGCCTGCTTCTCCCATGGGTGAACCCAGGGG  
CATCCGCAGGCCGAATGAGGT

; Ktedonobacter racemifer DSM 44963; two 97% identical copies  
; This transposon is inserted into GT|GA target (no duplications).  
; Terminal palindromes:

; head 24 68  
; Q: GGGGCTTGTGG--GAGACTACCCTGAGTGGTCTTGGCTGCGAGCCCC

```
;      |||:|:|--:||||:|:| | |:|:|:|:|--|:|:|
; S: GGGGCTCGCAGCCAAGACCACTCAGGGTAGTCTC--CCACAAGCCCC
;
; tail 1634                                         1680
; Q: GGCGGCACCTTCCCTCCCAGGCGTGAACGCC-GGGGCTTCCGTGCCGCC
;      |||:|:| | ||-||| | |||-||| | |||
; S: GGCGGCACGGAAGCCCC-GGCGTTCACGCCTGGGGAGGAAGTGCCGCC
;
```

ISC2-4\_KR

```
CAGCGACCCACCGGTAAACCGGGGGGCTTGTGGGAGACTACCCTGAGTGGTCTTGGCTGCGAGCCCCGA
TGCTGACCAGCCCCGGTGTGCTCGCACACCGGAGCCGTTTCCAGAAAGGAGCGCGAAAAAGCAGACCCTGGA
GTGGCTTTTCCAGCTCCCGCTCTTTAATTGCTCAGTTAAACAGGTTGATGGGGTGTCCAAAGCCAGTGC
TGAGCAAAGATCGCCGCTTCTGACACCGGGCGAGGAAAACATTACCGTTCGTGTGTGCTGGACAGGAAG
GCGCACACCAACCGGATGCCTCATTACGAGGCCCCCGCAAGGGGAGAACAGGAACAAAACCATGTCCGCT
GTATTGATTGTGGATGCAGAGCGCAGGCCGCTCATGCCCTGCACTCCTGCCCGCGCCCGTCTTCTGCTCA
AGGCGGGCAAGGCAGCCATCTTGCCTGCTTTCCCTTTGTGCTGATTTTGCAGGAGGCCAGGCCAGAGGC
CGTGGTGGAGCCGCTGCGCGTCAAACCTCGATCCTGGGTCCAAAACAGCGGGATTGCCGTGCTCCATGAA
CAATCAGGTGAGGTGATGTGGGCGGCGGAGCTGACTCATCGAAGCACGCCGCTTCGCGAGGCGCTCGCGA
AGCGGCGTGTGTGCGCCGATCTCGACGCAGCCGCCATACCCGCTACCGTGCAGCACGGTTTGCCATCG
GAGGCGGCCCAAAGGGTGGCTCGCGCCCTCGCTTGAGAGTGCAGTGCCTTACCTGCTGACCTGGGTCAAG
CGCCTGTCCCGCTGGTGTCCGGTTGGCGCGCTCTCCTTGAACTCGTGCCTTTGATCTGGCGTTGCTGC
AGAACCCTTCCATTGAGGAGGTGCAATACCAACCGGAAACCTTGTGGGGAACGGAAGTACGCCAGTATCT
GCTCGACAAATGGCAGCATCGATGCACATATTGCCAGGCGAGCGAGGTGCCATTGGAAATCGACCATGTG
TCTCCCCGTTTCAAAGGTGGATCGCATCGCATCGCAAATCTCGTCATCGCGTGTTCGCCCTGCAACCAAG
CCAAAGCGCATCAACCCCTTGAGTCTTTCTGGCAAACCGACCAGACGTGCTCGCTCGCGTGCAGGTGCA
GCGTGCAGCCCACTGCATGATGCAGCGGGTCAACAGCACCGGTGGCAGCTGTATGAGCGCTCAA
GCCCTTGATTTGCCGTCGAGACGGGTCTGGCGTCTGACTAAGTGAACCGACAAAGCCGAAACCTTC
CGAAGACCCACTGGATCGATGCCGATGCACAGGGCGATCAACGCCAGAACGCCCTCCAGATCCGCGATGT
TCGTCCCTGGCTGATTCAGGCACAGGGGCGGAGGCTCGTGCATGGTCAATGTGGATAAACGGGGTTC
CCGCGAGGAAAAGCCAAAGGACCCAGCGCATCTGCGGATTGAGGACAGGCGATCTGGTCCGTGCGGTGG
TCACGAAAGGCAAGAAGATCGGCACCTATGTGGGCGTGTGGCGATCAAGTCCGATGGGTACTTGAACT
GACAGGGCGTCCGTTCGGCATGGTGCAGGGAATTCACGCACGATATTGTGGCCGGTCCATCGCAACGAT
GGCTACGCTTACGCGCAAGGAGAGGGCGCACTTCTCCCCAGGCGTGAACGCCGGGGCTTCCGTGCCGCG
GTTTGGT
```

```
; Ktedonobacter racemifer DSM 44963; 2 copies (99.5% identical)
; Codes for Cas9H and Y1 TPase (overlapped ORFs).
; Its 35-bp 5'-terminus is similar to the one in IS605B-1_ME.
; Terminal palindromes:
```

```
; head 24 47
; Q: CAGTGGCTTCTTCGGAAGTCACTG
;      |||:|:|: | ||:|:|: | |||
; S: CAGTGAATTCGGAAGGCAAGTCACTG
;
; tail 1936 1982
; Q: GCGGCAATTCATCCACGAAG-CTGAAGACTTCGCGGTTTTTCTTGCCGC
;      |||:|:| | ||:|:|:| | | -|||:| | | |||
; S: GCGGCAAGAAAACCGGAAGTCTTCAG-CTTCGTGGATGAATTGCCGC
;
```

ISC2Y-1\_KR

```
GAACTACCACTGAGCTGAAGACGCAGTGGCTTCTTCGGAAGTCACTGAAGACGCAGACCAGGAGCTTCTT
CGGAAGCTTGAGTTCACCAGACTCGTTTCCAGAAATGGGAACAGCGTTCGATTGGTTCATGACACCTGCGG
TTGACGCATCAGACCGCTGCTCTGTGCTGAGGGTTAAGTAGGCTTGAGGAAAGGGCCGGTGTCTCAGC
GCAAAAAGCCTTTTGAACACTGTGCGAGATGAAGCCGATTCCCTTTCGTGGTTCACAGCGAAGGGATACGCA
CCACCCGGCGCTTGCCGGAGCATTTCGGAAGGAGTTTTCTATGAACGTCGTCTACGTCTCTCGTCCG
AGAGAACACCATTAATGCCCTGTCAACCTGCCATTGCGAGGTTGTGCTGAAACAAGGAAAAGCAAAGGT
GAGGCATCGAACGCCCTTTACGATTACGCTTCTGCACAGCCAGAGCACGTGTACACACAACCTGCTGACC
CATGGCGTTGATACGGGAAGTTCATAATCGGATCAGCCGTGGCTAATGAGCATGGACACGTGCTGTATC
TTTTGGAAGTCGAGATACGCAATGATATTGCAAACACTATGAAGAACGAGCGAGAGCACGCCGCAATCG
TCGTCAACGCAAGACACGCTATCGCCCTGCTCGCTGGCTCAATCGCAAGAAATCGATCAAACCTGGACGC
```

TTCTCGCCCACCATGAGAAGCAAGATTGATACTCATCTGCGAGAAATTCGCTTTATACGGTCATTGCTGC  
CCATCACGTCTACGATACTAGAAACAGGCTCATTGATCCTCATGCACTCAGAAATCCTGAAGTCCTGCA  
AAAGAAGTGGCTCTACCAGAGGGGCATCAACTACGGTTTTTGCCAATACCAAAGCCTATGTGCTCACACGA  
GACGGCTACCTCTGTGACGAGTGCAAAGGGAAGTCAAAGGACCGACGGCTTGAAGTTCACCACATCATCT  
TCAGAAGTCGAAATGGAAGCGATGAGGAAGCGAATTTACTCACTCTCTGCAAAACTTGTGCATGATGGACT  
CCATGCAGGCACCATCACCCTGAAACTCACAGGCAAGAAAAAGGGAACCTTGCAACATGCGACCCAGATG  
AATAGCATCCGCACTCAGTTACTCAAGCGTGTGAGGCGAGAGGAAACCTGGGGCTTTGTCACCAAAGAGC  
ATCGTCTTCTGGTAGGACTCCCCAAAGAGCATATCTTTGATGCAGCCGTGATTGCAACACGAGGAGTGAA  
GCCAACCTTCTATACCACGAGCGTGCTCTCAAAACGCTGTGTGTCAGATGGAGATTACAAACAAACGAAA  
GGAAAACACGGTCAACAACGAGTGAACACAGGCAAGATCATGGGATTTGCAAGTTTGATAAGGTGTA  
ATTTGGGGAAGGAGTACTTTATCAAGGGGAGAATGTCTACCGGCTACGCGATCCTCATGGACATTGACGG  
CAACAAAATTGAGTTCAAACCACTTCCCAAGTTTGACAAAATGAAGAGAGTAAGTGCACGTTTCATCATGG  
ATGATGAAACAAAGAACCACGCCAAATTCCTCATCTCTATCACCTCATCTTTGCTGCAAGTGCAGGAA  
AAAACGTTTGATGCGCTCTGGAGATGAGACAAAAGGATATTGAGGTCATTGCAACACAATCAGACGTT  
TCCTTTGAGACGATGGAGGTGGACAAGGATCATATTCAGTGCCTAGTAAAAAGCGAACCAGGATAGCAC  
CACTCGCGATAGTACGAAGGTTAAAGCAAGAATCGACTCTTCAGCTTTGGCAGATGTACGAAGATGAATT  
GAGAAGACACTTTTGGAAAGGAAAGGACATTCTGGAGCGATGGATACTTCTGCCGTACCGTTGGCGATGCA  
AGTCAGGGAACAAGACGCCAGTACATTGAGGATCAAGGGTGGAGGTGCGGCAATTCATCCACGAAGCTGAA  
GACTTCGCGGTTTTCTTGCCGCCTTTCCTAT

; Ktedonobacter racemifer DSM 44963; 4 copies ~98.5% identical to the consensus  
; GT|AA target site (no duplications).  
; This transposon is nonautonomous; it codes for the C-truncated Y1 TPase and Cas9H.  
; ISC2Y-2\_KR is 74% identical to ISC2Y-1\_KR.  
;

; Terminal palindromes:  
; head 19 52

; Q: AGCTGAAGACGCAGCGGCTTCTTCGGAAGTCGTCGGGTCTGCGGTT  
; | : | : | | | | | | : | : | : | | | | : : | | | | : | : | : | | | | | : | : | : |  
; S: AACCGCAGACCCGACGACTTCCGAAGAAGCCGCTGCGTCTTCAGCT

; tail 1940 1991

; Q: GGAGCGGCG-TTCATCCACGAGG-CTGAAGACCTCGTGGTTTTCTCGCCGCTCC  
; | | | | | | | | - | | | | | | | | - | | - | | | | | | | | - | | | | | | | |  
; S: GGAGCGGCGAGAAAACCACGAGGTCTTCAG-CCTCGTGG-ATGAACGCCGCTCC

ISC2Y-2\_KR

GTGAACTACACTGAGCTGAAGACGCAGCGGCTTCTTCGGAAGTCGTCGGGTCTGCGGTTTTGGGAGCTTT  
TTAGGAAGCTCAAGTTCACCAGACTCCTCATCAGAAATGATGAGACCGTTTGAAAGGTTCATGACACCTGC  
GGTTGACGCATCAGACCGCTGCTCTGTGCGCTGGGTTTTAAGTAGGGCTGAGGAAAGGCCCGGTGATCCAG  
GTGCAAAAAGCCTTTTGAACACTGTGAGATGAGGTCGGATTCCCTGCATGGTCACAGTGCAGGGATACG  
CATCACCCGGCGCTTGCCGGAGCATTTTTCCGAAAGGAATCGTCTGAACATGGTCTATGTCTCTACCA  
GATAGGACGCCGCTTATGCCTTGCTCTGCTGCGATTGCCGTTTGTGCTCAAAGAGGGAAAGGCCAAAG  
TCGTCCGCAGAACCCTTTTACGATCAAGTTGTCTGTACAGCCAGAGCGTACCTACACCCAACCCTTGAC  
CTTGGGAGTGGATAACGGGAGTGCGGTATTGGTTTCGGCTGTGCGGATGAACAGGGCAGCATCTTGTAT  
CTTTCTGAAGTGGAAAGTGCGCAATGATATTGCCACGACGATGAAAAGAACGAGCCACCCATCGTCGAGATC  
GCCGCAACCGAAAGACACGCTATCGGCCTGCACGCTGGTTACATCGAAGGAATTCATCAAGACTGGGCG  
ATTCTCCCCAACCATGAGAAGCAAGATCGACGCCATCTGCGAGAAATCCACTTTGCGCACTCCTTGTG  
CCAATCTCGTCCATTGTGCTGGAAACAGGAACCTTTGACCCGCATGCGCTCAAAAACCCGGAGGTGCTGC  
GAAAGAAGTGGCTCTATCAGAAGGGCATCAATTACGGTTTTTGCCAATACCAAAGCCTATGTGCTCACACG  
GGATGGCTACACCTGTCAACACTGCCAGGGGAAATCCAAGGATCAACGGCTCGAGGTGCATCACATCATC  
TTTCGTAGCCAACACGGAAGCGATGAGGAAAGCAAGCTCTTGACGCTCTGCAAGACCTGTGCATGATGCC  
TTCACGCTGGGACTATCCCCCTCAAGCGCACCGGAAAGAAAAAAGGGGATTTGCTGCACGCGACCCAGAT  
GAATAGCATCCGCGTGCAATTGTTGAAACTGGTTGAGGCGGAAGAAACCTGGGGCTTCGTGACGAAAGAA  
CATCGATTGCTTGGCGGTTTTGCCCAAAGAACATTGTTTTGACGCGGCCATGATTGCGACACGCGGAAATC  
GGCCTGTTTTCCAGATACAAACGGTGTGTTGTCAGAAATGCATTCAGATGGAGAGTATCAGCAAACCAA  
AGGAAAGCGAAGCGAGCAACGGATCCCGACAGGAAAAATCCAGGGATGCGCGCAAATGCGACAAAAGTGC  
TTATCGAGGTGAGGAATACTTTATCAAAGGGCGTATGTCTACTGTTATGCTATTTTGGATGATGATAGAC  
GGGAAAAAGGTGCGATTTGAAACCCATTCCCAAGTTTGAGAAGATGAAGAGAGTGAAGTGCAGGATCCTCAT

GGATGACCTGTCAAAGCATCATGCCAGGTTCCCTCATGCTCTCTCATCTGATGTTCTGTGCAAATACCGG  
AAAAAGCTGCTTCTCTTCTCTGGAAATGAGGAAAAACAAGTATTTGAGGAAATTGCAGCTCGCTCAGAGG  
TTTCTTTTGAGGCACTTGAAGTGGATCAAGATCATATTTACTGTGGTGGTGGAAAGCGAACCTCGGATGCG  
CACCGCTGGCCATCGTCGGCAGACGGAACACATCTCGACCATGCAACGTTGGCAAAGGCATGCGCAATG  
CGTTAAAAGGGCAATTTTGGAAAGAGAGGACATTCTGGAGTGATGGGTTACTTCTGCTGCACCATCGGGAA  
TGCAAGCAGGAGACTATTCACCAGTACATTGAAAGCCAGGGATAGGAGGAAGGAGCGGCGTTCATCCACG  
AGGCTGAAGACCTCGTGGTTTTCTCGCCGCTCCCCGTATAAA

; Geitlerinema sp. PCC 7105; 10 copies  
; GT|GG target site (no duplications).  
; palindrome at pos 8-38: CCGCCGTCAAGCCTGTTGGCTATGACGGGGG  
; == =====  
; palindrome at pos 1560-1629:

; tail 1560 1629  
; S: GCGGGAATCCCCTCCCGCTA-ATCCTGTCGGATATAACGGGAGTCCCCTTCCCGC  
; ||| ||| :||-||| :| |||-||: ||| ||| ||| |||  
; Q: GCGGGAAGGGACTCCCCTTATATCCGACAGGAT-TAGCGGGAGGGGAATCCCCT

ISC2-1\_GS

CAACAACCCCGCCGTCAAGCCTGTTGGCTATGACGGGGGCTTGAAAAAGCCCACAAGTTGACCAGCCTAAG  
TCTTCCGAAGACTACGTTACGTCCGAGAGTTAAAGTTCCCTACCGACGAGTACGTTGCCAGCTTGTGCGTC  
TAGAACTGAAAAGTTAAACAGCTTTAAACGGGTTAAGGCAGTGCTTTTCAGAGAGTACCGAGACGTAACC  
TTGGCGAGGCAAACGTTACCCCTTTGGGAGTTGTGTATTATGCACGTTTTCTAGACAAAAGACAAA  
AAACCCCTAGCACCATGCCATCCAGCCAAGGCGCGGGCTCCTGAAATCCGGTCGAGCTTCCGGTGTTC  
GTCGCTATCCATTTACCCCTTATCTTGACGAGATTGAAGCCAAAAGATTGTGTCTCGTTCCGAAAACCTCACT  
CAAAATCGATCCCCTCGCAAACAACCTGGGTTGGCTATCCTGTCCGAAAACCGAGTCATTTGGGCGTCC  
GAACTCAGCTATCGCGACAGCAAATTAAGAACGACTTAGAGAAGCGTCGCGCTTTACGACGCTCCCGAC  
GCCATCGAAAACCTCGTTACCAGAAAGCCTCGCTTCTTAACCGTACTCGTCCGAAGGTTGGCTTCCACC  
GTCTCTCAACCATCGGTCGAAAACCTACGATGACCTGGGTGAACCGTTTGCAGAAAACCTTTGTCCGATCGTC  
TCGATTGCTCAAGAACTCGTGCGGTTGCATAACCCAAAACCTCCAAAACCCGAAAGTGAAGTGGTATTGAGT  
ATCAGCAGGGCGAAATGTTGGGCTATGAAGTGCAGGTTCTTGTAGAAAAGTGGGTCGGAAGTGCAT  
CTATTGCGGTGCTGAGAACCTACCATTAGAGGTGCAACATATTCATCCCAAATCCAGGGAGGGAGCGAC  
CGAGTTTCTAACCTAACGCTGGCTTGTACTACTTGAACCAAGCTAAGGAAACCGAGATATTCGCGAGT  
TTCTATCGGGCAAACCGACCCTTCAACCGTATTTTGAACAGGCAAAGCGCCGTTAAAAGATGCGGC  
AGCAGTCAACGCAACTCGCTGGAAGCTGTACCAACAGTTGAAAGAACTGGATTGCCCGTTGAAAGTGGGA  
ACGGGCGGACAGACTAAGTTTAAATCGGACTCGATTGGGTTTGGCGAAAACCTCACTGGCTCGATGCTGCTT  
GCGTCGGGAAATCGACTCCCGATCGATTAGATGTGCGGGTTCGAGAAACCTTTACTCGTTGCAGCCAAAGG  
TCACGGAGTTCGGCAACGATGTCGTCGCGATCGATACGGTTTTTCGAGGGCTGTTGCCCCGAAAAGCCAAA  
TCTTTTCAAGTTTTCAAACCGCGGATATAGTCAAGGCGACAATTCCTCAAGGAAAATTCGCCGAAAATT  
ACACGGGGCGGATTGCTATTGCTTTCCGCCCTTCTTTTCGACTGAACGCTGGGGTTAAACCTTTTGACGT  
TCATCCGAAATATCTGACGACTGTTTCAAGAAATCAGACGGCTATGAATACAGATTCTCGAAATAAGGATGC  
CCTGTCGGGCAGTTCTTTGTTGGCGGAATTTCCCCTCCCGCTAATCCTGTGCGGATATAACGGGAGTCCC  
CTTCCCGCATTTTAGAT

; Geitlerinema sp. PCC 7105;  
; GT|GG target site (no duplications)  
; 2A and 2B are 91% identical to each other  
; FRAGMENT 12422 -> 10705  
;gi|442995890|gb|ANFQ01000137.1|

ISC2-2A\_GS

CAACGACCCGACACTGACCCTTCGGGTACAGTGCGGGCTTGAAAAAGCCCGAGAGTTGACCAGGCTAAGTC  
CTTTACGGACTCCGTTATCGAGGTCACGACACCGACGAGTTAGCCAGCTTGTGCTCTGTGCTCGGTCGT  
TAAACAGCTTTACTCGGGTTAAGGCAGTGCACCGACCTCACAAGCCTCGATAACATTGCCGAGGCAAAC  
GTTACGTGCGCTAAGCGACAGGAGTAGACAGAAATGTCTAATTTTTGTTTTGTACTCGATAACGAACCGAC  
AGCCCTCACACCGTGCCATCCCGCACGGGCTAGGGAGCTGTTAGCCAAGGAAAGGCGGAGTTTACAG  
GCGCTATCCGTTCACTATCGTTTTAAATCGTGCTGTGGGCGACGTGCCGCCGAAAAGCCAACTCAACGCT  
TCGACTCCGCTCGCTTTCGACTTCGCTCGCTTCGACTTCGCTCAGCGTTGAGTCTCGACTCCGCTCAGAC  
TCAAGATAGACCCCGCTCCCAAACACCGGATTGGCTGTGCTCAATGGCAACCAACTCGTGTGGGGCGC  
GGAATTACAACACCGAGGCGATCGCATCAAGCGAAATTTGAAACCCGTCGCGTCTGTGCTCGGAATCGT  
CGGAACCGCAAACACGATATCGCAAGCCTCGGTTTCTCAACCGCACCCGTCCGAAGGTTGGCTTCCAC  
CGTCTCTCAACGCTTCGGCTCCGCTCAGCGTTGAGTCCGAGCGGAGTCGAGGACTCAACCATCGGGTCAA  
AACCAGTTGACGTGGGTGAACCGTTTACGAAAACCTTTGCCCATTCGATCGATCTCTCAAGAACTCGTG



CGGTTTCGACACCCAGAACTTCAGAACCCCCGAAATCAGCGGCGCTGAGTACCAACAGGGCGAATTGTTTG  
GCTACGAGGTTTCGGGAGTACCTGTTGGAGAAATGGGGTTCGAAAGTGCGCCTATTGTAGTACTGAGAACGT  
ACCGTTAGAGGTCGAACACATTACCCCCAAATCGAAGGGAGGGAACGATCGCATCTCCAATCTCACCCTT  
GCCTGTCGTCCGTGCAACCAGTCCAAAGGCAACCGCAACGTTTCGAGAGTTTCTGTTCGGGTAAAGCCGTCCG  
TTCTCGATTGCCTCTTGAGACAAGCCAAGGCACCTTTAAAAGATGCGGCGCGGTAAATGCGACCCGCTG  
GAAGCTATAACCAGCGATTGAAAGAGACCGGTTTGCCTGTGCAAGTGGGAACAGGCGGACAGACCAAGTTC  
AACCGCACCCGATTGGAGTTGCCGAAAGCTCACTGGTTGGATGCCGCTTGTGTAGGAGAGACGCCATCAC  
TCCATTTAGTAACTGAAACCCCTATGGCGATCTTGAGTAAAGGTCGTCCGACGAGATTTTCGACCCCTCAT  
CGACCGCTACGGTTTTCCCCGTGCTGTGAGGAAAACCAAGGCGCAAGTCAACGGTTTGCAGGCAGGCGAT  
ATCGTGCGAGCCACTGTGCCGAAACGGGAAATATCGCGGACAGTGGACCGGAGCGATCGCCGGAGTGAGAG  
AAAAACGCCCTCCCGCCCTGCGTCCCTTCGGGGGAAAGCAGCTCGATTTAACCGCTCAAACGCAAATTC  
TGTAATTCACAAACAGGATGGTTATGAATACGGCATCAACCCGTGCGGGCATTCTCCCGACGCTGACCG  
CAAGCGGTACAGCGCGGGGCCCTGCCCCGCTTATAGCT

; Geitlerinema sp. PCC 7105

; FRAGMENT 2075 -> 375

;gi|442996156|gb|ANFQ01000039.1|

ISC2-2B\_GS

GTCAACCACCCGACGCGACCAAGCACGGGTACGGTGCGGGCTTGAAAAAGCCCGACAGTTGACCAGGCT  
AAGTCTTTACGGACTCCGTTATCGAGGTCACGACACCGACGAGTTAGCCAGCTTGTGCTCTGTCTGTCG  
GTGCTTAAACAGCCCTACTCGGGTTAAGGCAAGTGCAGCCGACCTCACAAGCCTCGATAACATTGCCGAGG  
CCAACGTTACATCGCCTAAGCGATAGGAGTAGACAGAAATGTCTAAAATACTACGTTTTTCGTACTCGA  
TACGAACCGACAGCCCTCGCACCCTGCCACCCCGCACGGGCTAGGGAAGTTAGCCAAGGGAAAAGCG  
GCGGCTTCCGACGCTACCCGTTCCGCTTCGTTTAAATCGCGCTGTGGGCGACGTGCCGCCCCGAAAGCC  
AACTCAACGCTTCGACTTCGCTCAGCGTTGAGTCCGAGCGGAGTCGAGGACTCAAGATAGACCCCGTTC  
TCAAACCACCGGATTGGCTGTCTCAATGGCGACAAACTCGTGTGGGGCGCGGAATTACAACACCGAGGC  
GATCGCATTCAAGCGAAATTGGAAACCCGTCGCGCTGTCTGTCGGAGTCGCCGCAACCGCCAAACGCGAT  
ACCGCAAGCCTCGGTTTCTCAACCGCACCCGTCGGAAGGGTTGGCTTCCACCGTCTCTCAACGCTTCGGC  
TCCGCTCAGCGTTGAGTCCGAGCGGAGTCGAGGACTCAACCATCGGGTGGAAACACGTTGACGTGGGTA  
AACCGCTTGCGAAAACTTTGCCCCATTGCATCGATCTCTCAAGAACTCGTGCGGTTCGACACCCAGAAAC  
TTCAGAACCCCGAAATCAGCGGGGTTGAGTACCAACAAGGCGAATGTTTTGGCTACGAAGTGCAGAGTT  
CTTGTGGAAAAGTGGGGACGGAAGTGTGCCTATTGCAGAGCTGAGAACGTGCCTCTGGAAGTCGAGCAT  
ATCGTCCCCAAGTCTAAAGGCGGAAGCGATCGCGTCTCAATCTCACCTGTCTGTCGCGTCCGTGCAATC  
AATCCAAGGGCAACCGCGACGTTTCGAGAGTTTCTGTTCGGGTAAGCCGTCGTTCTCGAGCGCATCTTGAG  
ACAAGCCAAAACCCATTGAAAAATGCGGCTGCGGTAATGCGACCCGGTGGAAAGCTATAACCAGCGATTG  
AAAGAGACGGTTTTGCCCGTGAAGTGGGAACAGGCGGACAGACCAAGTTCAACCGTACCCGATTGGAGT  
TTCCGAAAGCTCATTGGCTTGATGCCGCTTGTGTTGGTAAGACGCCATCGCTACATTTAGCAACTGAAAC  
CCCGATGGCGATCGCGAGCAAAGGTCACAGCACGAGATTTTCGACCCCTCATCGACCGTTACGGTTTTCCC  
CGTGTCTGTGAGGAAAACGAAGGCGCAGGTCAACGGTTTTGCAGGCAGGCGATATCGTGCGAGCGATCGTGC  
CGAACGGGAAATATCGCGGACAGTGGACGGGGCGATCGCCGGAGTGCGAAAAAACGCCCGCCCGCTT  
GCGTCTTTTGGAAAAAACAGATCGATTTAACCGCTAAAACGCAAATCCAGATCGTTACAAACAGGAT  
GGCTATGAATACAACATCAATCCGTGCGGGCATTCTCCCGACGCTGACCGCGAGCGGTACAGCGCGGGG  
TCCCTGCCCGCTTATAGCTGG

; Coleofasciculus chthonoplastes PCC 7420; 4 identical copies

; TT|GG target site (no duplications).

; Palindrome at pos 7-34: CCCACGCTACTAACGTGGAGCGTGGGG

; =====

; The 3'-terminal palindrome at pos 1353-1383:

; tail 1353 1383

; Q: TACTTCGTTGAGGTCCGAGTCCCACGAGGTA

; |||:|||| |:| || |:| |||:||||

; S: TACCTCGTGGGACTCCGACCTCAACGAAGTA

;

ISC1-1\_CC

CAGCAACCCACGCTACTAACGTGGAGCGTGGGGATTGCCAGAGACAAGTCTGGTGACGCAAGAGTTGAA  
TAGACCACTAGCCATCAACTGATACACACTTCCGAATGCTTCCCAGTTCCGATCAACTGTAAGCCTACT  
TGTTATAGGCGCTTGAAGAAAGGACATTTTGTGGTGGTGGTTCGAGGGGACTGATAACTCACACGAGAGG  
CTTATATCCATGATTTCGTGTTCCAGTTTTATACCAAAAAGGGAAACATTAATGCCAGCTAAAGCTAGCC  
GTGTTCCGACGGTGGTTAAAGTCAGGCAAGGTCAAGGTTATACGCAATGACTTAGGTGTCTTTCAAGTCCA  
GTTAGTCAAGGAACCGTCAGGTGAACAGACCCAAGATATTGCAGCCGGAATTGACCCGGGAAAGCTGTTT

```

ACTGGGATGGCTGTCCAGTCAAAAAGTGTACCCCTATTCCTTGCCCATCTGAACCTACCATTTAAAACCG
TAACCAAGCGGATGCAAGGGCGGGCGATGATGCGACGAGGACGGCGAGGGCGACGGATTAACCGGAAGGT
TCCTTATGACCAACGCAACCACCGCAGTGCCGATTCGATAACCGCAAAGGTCATAAAATACCTCCCAGC
ATTCGGGCGAATAAGCAGTTAGCACTACGGGTGATCCAGGAGTTATCAAAGATTTACCCGTTTACTCATG
TCCTCGTGGAGGTGATTAAGCTAGAGGTGACAAGGGTTTTAGTCCGGCAATGGTCGGGCAGTATTGGCA
AATTGAGCAGTTAGAACAAGCAGGCTATACCGTCCACACCCAAGAGGGATGGCACACCTCAAACCTAAGA
AAGTATCTAGGCTTACCCAAGTCTAAGAATAAAGCTGAGGAATCACCCGCCCATGCCGTTGACGGCA
TCTGCCTAGCCGCTCCCGTTTATACGGTATCGCCAGATTAAGGCAGAAGTGGTACCTTCTAGGGTC
TATTACGGTAAACCATGTTCAGTTTTGCAGTATTAGTTCGCTCTCCAATTTGCCGCCGTCAGCTACATTTA
ATGATTCGCCGCAAGGGAGGGAAAACGGCGGCATTATGGTGGACCCTCACCCGTCACGGGTTGAGGAAGG
GCGATTATGTCAAAGCTGAAAAGGGGTTATCACTTACTACGGTTACGTTTCCGGTGACACTAAACTCA
AGTCTCGGTGAGTGACGCTAAATGAAAACGAATAGGGAGGTTTACCACCAAAAAAGTCCAATTGTTGCAA
CGAAATACCGGACTGGTATCAACAGTTGGGTTGTCAAACCTTGCCCTGAGCGAAGTCGAAGGGCGTGGTT
TGACCTCTATCCCCCTCCGACCTACTTTCGTTGAGGTCGGAGTCCACGAGGTAACACGAT

```

```

; Coleofasciculus chthonoplastes PCC 7420; two 99.56% identical copies.

```

```

; TT|GA target site (no duplications).

```

```

; Palindrome at pos 7-36: ccctgacttagctatcgcttgaagtcaggg

```

```

;                      =====
;
; The 3'-terminal palindrome at pos 1421-1462:

```

```

; tail 1421 1462

```

```

; Q: CTCACCCCTC--CTGAGCCTGCGAAGGATCTGCTGAGGGTGGAG
;  ||||| | | | | | | | | | | | | | | | | | | | | | |

```

```

; S: CTCACCCCTCAGCAGATCCTTCGCAGGCTCAG--GAGGGTGGAG

```

ISC1-2\_CC

```

CAACAACCCTGACTTAGCTATCGCTTGAAGTCAGGGATTGACGGACAAACGTCATTAAACGTTGAATACC
GCGTAGAGTCTCAGCTTGGTACAGACATCCGGATATTTCCCTAGTCCGGATTACCTCTAAAACCTTTTGT
CGGGTTGTTGTTAAGCCAAGACATCTTAGCTGAGATGGCGGGAAGGGACTACACACTTTTACTCGGAGGT
TTATCACCATGTTACGAGTACCAGTTTTATCGAAATCAGGTAAACCGTTAATGCCTACAAAACCCAGCCG
CGCTAGGCGTTGGTTGAGGGATGGTAAAGCTAAAGTAGTACATAACGACTTAGAATGTTTTGCCATTCAA
TTGACCTTTGAAACCAAGAGAATACTCAACCCATAGCCATGGGTATAGACCCTGGTAAATGCTATTCCG
GGATTGGGGTTCAATCGAGTCTCTTTACCCTTTGGATGGGACATCTGGTCTACCGTTCAAGACGGTTAA
GGAACGGATGGAATTACGGCGGGTCATGCGTGCAGCCAGACGGGGGAGACGGATTAACCGGAAGCTGCCT
TACTCTAAACGCTGTCATCGTCAAGCTCGGTTTGATAATCGCAGCAAGGCAAACTCCACCCGTC AATTTCG
AGCCAATAAGCAGCTAGAGTTACGGGTAGTCAAAGAAGTGTTTAAGCTGTTCCCGATTAGTGCCATTTCAT
TATGAGTTGGTGCATGGCTGACGTAGATAAAACCAGTGGTTCGTAATCGGCTCGGTCTGGTATTGGATTCT
CTCCAGTTATGGTAGGACAACGACAGATGCTCAACTGGCTATCTAAGTTAGCTCCTGTTGTTACCCACAA
GGGGTGGCAACCGGGATGGTAAACGGAACCAGTCAGCTTAGACAATGGCTAGGATTAGCTAAGGACAAAAAG
AACAAGCTAATCAAACCTCCAGCAACTCACGCTGTTGACGGTGTAACCTTAGCCGCGTTTGGAGTTTACCC
GATGGCAGGAATGGCACTCTGATAATGCCAAACATGGCGACTGGAGTGGTTATGTTCAAATCACACCTGC
ACCATTTGCGGTAATCCGTAGACCGCAATTAGCCGTAGACAGTTACATTTATGTGTCCTTCTAAAGGA
GGTAAGCGGCGCAAGTATGGCGGCACAGTTACCCGCCATGGGTTTAGGAAAGGTGACAAAGTTATAGCCG
AAAAAGCTGGGAAGACTTACGTCGGTTGGTGTCTGGAGACACCGAGAGACAAGTTTCGGTCAGTGACGC
CAACTGAAACGGTTGGGACAGTTCACTGCATCAAAGTCCAATTGTTGCAGCGAAGCACGGGGTTAATC
GTTTCGCCGCAAGCGAAGTCGAAATGTCGTGCCTTCAACTGGATTTGTCAAATCTCCCTTATTGAAAGGG
TCGATTTGACCTCTATCCCTCTCCACCCTCCTGAGCCTGCGAAGGATCTGCTGAGGGTGGAGTCTCACGC
GAAATACGAT

```

```

; Youngiibacter fragilis 232.1 (6 copies, 96%, no harboring repeats).

```

```

; GT|GA target sites (no duplications).

```

```

; Terminal palindromes:

```

```

; head 8                                27
;   Q: CCCTCGACTGAAGTCGAAGG
;   ||:||||| | | | | | | | | |
;   S: CTTTCGACTTCAAGTCGAGG
;

```

```

; tail 1517                               1536
;   Q: CTCATGACTGAAGTCACGAG
;   |||:|||| | | | | | | | |
;   S: CTCGTGACTTCAAGTCATGAG

```



CACGGCCAGCCCCGCGCAACAAGGCGGGCGCCGCTCAGATCCGCCCGCTCAAGCCCATC  
CACGGCTGGCGCTCCGGCGACATCGCCAAGGCGCGGGCTAGAGGGTCGCATCTCTCCG  
CGCACCAGGGCAATTTTGAAGTCCGCGCCGCGGGACAGAAACCCCGCTCGTTCCACCT  
CGTGATTTCAAGGCGATCCATCGCAACGACGGATACGCGTATCAATGATGTTGCGTTCGT  
TGCGGAAAATTCGTGCCG

; Cyanobacteria: *Microcystis aeruginosa* NIES-843

; Target site N|ATGA

; consensus

ISCl-1\_MA

GTCACTAACCCCGCCCTAAAAGGGACGGGGCTTGCCTAGACCAATTTAGGCGACGCAAGTAGAGACTACC  
GCATCGAGACACAATCTGGCACAGACTTCCGAATGCTTCCCTAGTTCGGATTCCCTCTCAGCTTTATTGG  
TAAAGCGTTGTTAGACAAGACATCTTGATTGTGTTGCGGAAAGGGACTTTAACTTTACTCTTAAGGATTA  
TCTCCATGGCAAGAGTTCCCTGTTATCTCAAAGACGGAAGTTCGTTGATGCCACTAAACCCAGTCGGGC  
CAGACGGTGGATTAAAGAAGGAAAAGCTATCGGTAAATTC AACGACTTAGGTATTTCTATGTCCAGCTA  
ATCGATGAACCTCCGATAGTAAAACCCAACCGATTGCTATTGGTATTGACCCGGTAAATTATTCTCTG  
GAATTGGCGTTCAATCCTCTCTTTTACTCTTTGGAAGGCTCACTTAGAACTTCTTTTAAACGAGTAAA  
AGAGCGCCTGGACAATAGACGGTTAATGCGAAGAGGACGTAGAAAAAGACGGATTAACCGCCAACTTTCT  
TTTAACTAAGAGCGCATCGACAAAAACGATTCTCAAATAGAAAAAAGGAAAATTAGCTCCCTCAATCA  
GAGCTAATCGTCAACTTGAACCTTCGCGTCGTTTCCGAACTAACCAAAATCTATCCAATTACTGACATTTA  
CTTTGAGTATGTCAAAGCCGATGTTGATTTAACTTCCGGTAGAAAAGGAGCTAAGTCTGGAAAAGGTTTC  
TCGTCCGTTATGGTCCGACAGAAATGGGCAATTGAGCAACTGTCTCAATTGGCAACAGTCCATACTCGCT  
TTGGTTGGCAAACCTCTAATCTCAGAAAATATTTGGGACTAGAAAAGTCCAAAAATAAAGCAGAACAAATC  
ACCAGAAAGCCATGCTAACGATGGCATTGCTCTTGCCTGTTTTCAATTTTTAGATTATTGGCCATTCCAC  
AATTATAATGGACATGGATATGATTGGAAGGGTTCTGTTAAAGTAACAAACGCTCCCTTTGCTGTCAATCA  
AACGTCCTCCTATTAGTCGTCAACTTCACCTGATGGTTTTTCTAAAGGTGGTAAACGACGTAAATA  
TGGTGGCTCTACCACAAGACATGGGTTCGTAAGGAGATTTAGTTTCTTCTCCCAAAGGAATTGGTTAT  
GTTAGTGGAGATAACCGAAAACAGCTATCTGTAAGCGATACCAATGGTCAACGATTGGGACAGATAGCTG  
TTAGCAAGATTAGTTAATTTCGTGTTCTAACGGTTAATTGTTTCTCACTAACTTATATAAAGCCGCC  
TCCGCTATCGCTAAAGGGCGGGGTTTCAGACCCATTTTTTTCG

; *Microcystis aeruginosa* NIES-843

; consensus from 46 copies

; N|ATGA target site

; Terminal palindromes:

; head 10 33

; S: TCGCCG-CCGTAAAACGGACGGCGA

; ||||| - |||| | ||| - |||||

; Q: TCGCCGTCCGTTTTACGG-CGGCGA

;

; tail 1284 1301

; S: CCGCCGTAAAACGGCGG

; ||||| |||||

; Q: CCGCCGTTTTACGGCGG

;

IS605B-1\_MA

TTGACATCCTCGCCGCGTAAAACGGACGGCGATTCCCAAACCTCACGATTTGGGTTTCTGCTTCTTTCC  
CGAAGGATTTTTCGCACCTGCCTTAACAGATTTACTCTGTTCTGGTCTTATGGTCGCTCTACAGACTGAC  
ACCGCAAGCCCTGCGGCCAAAATATTTTACTGGCGTTAATATCTCGGTTCATGGTGCCTCCACAGTCTG  
GACAAATCCATTCTCGAACATTTAACGGCATTCTCGGCAATATACCCGCAATTACTACACCTTTTAGA  
GCTAGGAAACCATCTATCTATTTTCGATGTAATTTCTCCCATACCAACGGCATTATAGGCTAATTGTCCG  
GTGATTTCTCCCGAGTTACGTCAGATATTGCCTGAGATAATTTCCGGGTTTTTGGACCATATTCTTGACGG  
CTAAATTCTCAACCACAATCGTTTGGTTTTTACGAACTAATTGAGTGGTTAGCTTATGTAATGGTCTTT  
TCTACTATCGGTGATTTGAGCGTGAATCCTGGCTACTTTGATTCTTGCTTTTTCCGATTTTTTGGACCT  
TTCTGTTTTCTAGAAAGGCTTTTTTGGGCTTTTCGCAGTCTCCGATAATGCTTTTTTAAAATGCTTGGGAT  
TAGACACTTTTATCGCCATCGCTGGTAATCACGAGGCTACTAATTCCTAAGTCAATTCCGATGGCTTTATC  
TGTTACTGGTAATGGCTTAATCGTTGGGTTCATCAAATCTAATTGAAATATGCCAACGTCCAGAGGGATGT  
AATCTGACTGTTACTGTGCTTGGTTCACAGCTTTCTGGTATTTGCTTTGACCATCGAATAGGTAAAGGTT  
CTGTGCATTTAGCTAAATAGATTTGTTTTGCTTTTAAATTTAAAAGCAGATTTGGTAAATTCGGCACTTCC  
TCCCTGATGTTTTTTCTTAAAGTTAGGATACTTAGTACGACCAGCAAAGAAATAGTAAAAGCTGTTTTGT  
AGGTGTCTTAAACCTTGTGTAAAGGTACACAGCTTACTTCATTGAGAAAGTCTAATTCTTCTGCTTTT

TCCAATCGGTCAACATTGAAGAAGTTTGAGCGTAGCCTACTCTTCTTGCTTTTTCGTACCAAGCTTGTGT  
TCGTTTCGTGGAGAGCTTTGTTGTAAACTAATCTTACACAGCCCAAAGTGCGCCGCAATAGCGACTCTTGT  
TCTGGTGTGGGGTAAAATCGGTAAAGAATAGGCTTTTTCATGTCTCACATTTTAGCATATATTTTCGTAAA  
TGTGCTAATATTTAACAGCAAAGCCGCCGTAAAACGGCGGGTTTCAGACCCAAATTTTCG

; Nitrosococcus halophilus Nc 4  
; consensus sequence from 4 99% copies  
; head1 14 58

; S: CTA ACTCATTCTCCAAGTTTCGTCCTGAACTTTCCGAATGAGTTGG  
; |:|||||: :|:|:|:|:|:|:|  
; Q: CCAACTCATTTCGAAAGTTTCAGGACGAACTTGGAGAATGAGTTAG

; tail 54 64

; S: TGCGCTGCGCA  
; |||||:|:|:|:|:|:|  
; Q: TGCGCAGCGCA

ISC2-1\_NH

GTTGAGTCGTCGCCTAACTCATTCTCCAAGTTTCGTCCTGAACTTTCCGAATGAGTTGGTTGGCTCAACCA  
GCCTCAGCCCTTCGGGGCTACGTTTGAAGTTGAAGCGAAAGCGACTCACCTGGGGTGCATTTCTCAGCC  
CCAGGCACTGAGGTCAAAGGCAATGAACTACGGAGCGACACAGGAGCGAATGCCGAGACTGAAACGACCCT  
TCAAAACATTGGCGAGAGAACCCTAACTTTTAGAGTAGCGAAAGCTAATGAATAGAGTTTTTTGTATTAGAC  
ACTGATAGAAAACCGTTGATGCCATGCAGCCCAGCAAGGGCAAGACGGCTGTTGCGAGACGGGAAGGCCG  
CGGTTTATCGGATGCAGCCATTTACGATCATCCTGAAATATAGGGTTGATCCCAACCCGAGCCGGTTGA  
ATTTAAGGTTGATCCGGGCAGAAAATAACCGGGCTGGCTTTAGTTGGGAATTTTCTCAACAGGGGGCGC  
GTGGTGTATGGGCCGCAATCTTACCATCGCGGGTACGCCATCCGTGAGCGGCTGGCTAGTCGTCTGTA  
GTTTTCGCGCGAGGTCGTAGAGGCAGAAAGACCCGCTATCGTGCGCCACGATTTCTAAACAGAACAAAACC  
GAAGGTTGGCTGCCGCCATCGCTAAACTCGCGGGTTGAAAACGTTTCGAGCTGGTTAATCGTCTGCTA  
GATAGAGTTCCCATTTCAGAATGTCATATCGAAACTGTGCGCTTTGATACTCAAAAATTCAGAACCCTG  
AAATTAACGGCGTTGAGTATCAGCAGGGCGAGTTGATGGGGTATGAGGTGCGCAATATCTGCTAGAGAA  
GTGGGACAGGAAGTGCCTTATTGCAATAAGAAAGATATCCCGCTAGAGGTTGAGCATATTATAACCGAGA  
TCGAGGGGGGTAGTAATCGGGTATCTAATTTAACCCCTGGCCCAGCGCCCTGCAACAAAAAAGAACA  
GCAAAACGGCGGCCGAGTTTGGGTATACCCAGATCCAGTCCAAATCCAAGCTGCCTCTAAAAGATGCAGC  
GGCGTCAATGCTACCCGCTACGCCATCGGGTGCCTATTAGTCAAGTGGGATTGCCGACTTCTTTTGG  
TCTGGTGGGCGCACCAAGAAAAACAGGATCAGCCAAGGCTATACCAAGACCATTGGATAGACGCGGCAT  
GTGTTGGCGAAAGCGCTGAGCAAGTGACAATAACTGAAGTTATCGGGCGCTACATATCAAAGCCACGGG  
GCGCGGAACAAGGCAAGTTCGTGAGAACCAGCAAAATATGGCTTTCTCGCGCAAGGCGGGGCGGTGTAGG  
CGAGTAAAGGGATTTCAAACGGGTGATCTCGTCAGGCTCTCGCAACCCCAAGGCAAGTACGCTGGCGATC  
ATGTTGGGATACTGGCCAGCATTTCGGGCTAGCGGCACCTTTGATGTGAAAGCCAAGGCCGGGAAGATCTC  
GGCCAACTGGATAAATTTCAAACCTAATACAGAGGGGAGATGGTTATGACTACAGTCTTTTCGGCTGTCTGA  
ACCAAATACGGCGACGACAGCAAGTAATGCGGCCCTCGCGCTCGATGCTCCGCTGCGCTGCGCACTCTCG  
CTAGGGGGCGTCGCACTTCCTTGACTCCTTC

; Halomonas meridiana strain Rlt3  
; It has a common 3' terminus with IS605B-1\_HM  
; conceptual consensus

; head 8 27  
; S: CCCCCGCCTGAAGGCGGGAG  
; |:|||||:|:|:|:|:|:|  
; Q: CTCCCGCCTTCAGGCGGGG

; tail 24 43

; S: CCCGGCGCTAAAGCACCGGG  
; |||||:|:|:|:|:|:|  
; Q: CCCGGTGCTTTAGCGCCGGG

ISC2-1\_HM

TCAACTACCCCGCCTGAAGGCGGGAGCTTGTGACAACAAGCCCGTTGACCAGGGAGAGCGGTAGCCAA  
CCCGCCTACGTTGATAACAGGTGCGCAAGACTCACCCACGGATGCTTCCTCAGTCCGTGGCTCTGAAAGG  
TCAAGATCATGCTGCGGTACGCCGCCGGGCGAAAGGTAAAACGCCGAAGATCTTGATCGCTGCCACAAG  
GCAGGAGCCGGTTATCGACATTTCCGAGGGGAGACGGGGCGCAAGCCCCGCGACACAAGGTCCGTAAGGG  
CATTGATTAGGAGGAAATCGCATGGCGATTTTCGTACTGGACAAAAAGAAGCAGCCGCTGATGCCGTGCA

GTGAAAAACGGGCTCGGTTGCTGCTACAGCGCGGGCGTGCCGTGGTGCATAAGCGCTATCCGTTACAGT  
CCGGCTGAAAGATCGAGTGGGCGGTAGCACGCAGCCACTAAGCCTGGGCATCGACCCTGGCAGCAAAACG  
ACCGGGCTGGCGCTGATACGCAACCGGACAGTCAGCAGCGGCATGTGCTGTGCCTGTTTTGAACTAATCC  
ATCGCGTTATCAGATCAAAAAGGCATTACAACAACGCGCCGCTTTTCGGCGTCGCCGCCGAGTGCCAA  
CCTGCGTTACCGCGCCCCGCGCTTCAATAATCGCACCAAAACCAAGGGCTGGCTGGCACCGTGCCTGCAG  
CATCGCGTCGATAACCGTCACGGCCTGGGTGAACCGTTGAATCGTTTAGCGCCTGTAACCGCCATCAGCC  
AAGAGTTGGTGCCTTTGATACGCAGAAGCTGGATAACCCCCGAGATCAACGGCGTGGAGTACCAGCAAGG  
CACGCTGCTGGGCTACGAAGTACGCGAGTACCTGCTGGAAAAATGGGGCCGTGAATGTGCCTATTGCGGC  
ACCGCCGATACGCCGCTGGAGATCGAGCATGTGATACCGCGCTCGCGGGGCGGCTCGAACCGCGTCAGTA  
ATTTGACCCTAAGCTGCCACCCTGCAACCAGAGCAAGGATGCGCTGTCACTGGTGGATTTTTTCGCCAC  
TGACAAAGGCCTGAAAAAGCGCCTGAAAGCCAACGGCCACACCCTAACGCTCGGCTTGAGCGTGTGCAG  
CGCCAGCTCAAGCAACCGCTGCGCGATGCCAGCGCGATCAATGCCACGCGCTGGGCGCTGTTTTAATGCGC  
TCAAAGCGACTAGCTTGCCGGTGGCTGTGCGCACCGGCGGTGCGACCAAGTACAACCGCCAGCGACTGGG  
CATTCTAAAACCCATGCTCTAGACGCGGCTGTGTGCGTTCGACTACATGCTTGGCAGGTG  
CCCACATTAACCATCAAGGCGATGGGGCGTGGTAGCTATCAGCGCACCCGAACACGGGTTTTCCGCGTGGC  
TATCTGATGCGGCAGAAGCAGGTGCACGGCTTCAAACCGGCGACATGGTGCCTGCGATGGTACCGACTG  
GCAAGAAAGCAGGTACCCATACGGGGCGTGTGCGGTACGCAAAACCGGCAGTTTTAACATCCAGACCGA  
ACAGGGGGCCGTGCAAGGCATCTCGCACAAATACTGCACCCTCATCCAACGCGGTGATGGCTACGGCTAT  
CACTTTACACCCTTACCCACCTAACAGGAGGAGCGGGACAGGCGGTGGCGTAACCCAGTGCCCCTGCGG  
GCGACGCGCTATCCCTCCCGCGCTAAAGCACCGGGTTTTCTCGCGCAAAATCTGATGAATGCT

; Halomonas meridiana strain Rlt3  
; gi|764088103|gb|JZEM01000040.1| 11370 -> 12688  
; N|ATGA target site  
;  
; common 3' terminus with ISC2-1\_HM  
; imperfect terminal palindromes:  
; head 9 30  
; Q: TCCCCTCCCTAAAGGAAGGAGA  
; ||:||||:|||| |||:||||:||  
; S: TCTCCTTCTTTAGGGAGGGGA  
;  
; tail 1278 1298  
; Q: CCCC GCCCTAAAAGGACGGGG  
; |||||:|||| |||:|||||  
; S: CCCC GTCTTTTAGGGCGGGG  
;

IS605B-1\_HM  
TTGACTGCTCCCCTCCCTAAAGGAAGGAGATTCCCAATTCACCGAGAACAGGACATGGAGACTGACGCCA  
TGCCGCTTACATTCTCTCCAAGGGCTAACACCGCCAGCCCGGCGCTTTAATGTTGGTTGCGGCGTTGTG  
GTCGCGGTCAATGTTTGCGCCACATTCGGGGCAGTTCCATTTCTGACCGTCAACGGCAGCGACGACAAT  
GTGTGCCACAACCCGAACAGCGTTTGGAGCTGGGGAACCACTGGTCAATGGCGACCAGTGAGCGTCCGC  
CCCATTCTGCCTTGTACGCCAACTGGCGCACGAACTACCCCATCCGGCATCGGCAATCGCTTTACTCAG  
CGTGGGGTTGCGGATCATGTTTTTCACTTTTCAAGGATTTCGACACAGATCACTTGGTTCTCGTTAATCAAT  
CTGCGGGACAATTTGTGCAAATTTGCTGTGCGCAATCGGAGATTTTGGCGTGAAGTTTCGCCACCTTCT  
GCCGGCCTTGGCACGGTTGGCCGAGCCGAGCTTTTTCTTGCTCAGTTCGTCGTTGTGCCTTGGCCAGCCT  
GGCGGCGTATTTGCGGATGCGCGGGATTGCCGACCCGTTACCCCTGGTTCGGTGGATAAACAGGTCTTTC  
AGGCCAGATCAATGCCGGTCAATGTTGGAGGTAACCGGCAACTTGCTGGGTTCGAACTCGCACAGACAGC  
TCACAAAGTAGCGGCCCTGCCGAGTCTTGGAAACCGTGACGGTGTGGGTTTCGCCGGGCGAGTTCACGGCT  
CCAGCGAATGTTACGCGGGTTTTGCTCTTGGCCAGATACAGCTTGCCGTCCCGGTATTTGAAGGCCGAG  
CGGGTGAACCTCCGCCGACTGGCGGTGCCGCTTGTCTTTGAATACCGGTTACTTAGCGCGGCCCTCAAAGA  
AGTTTTTTGAAGGCGTTTTGCTGGTGGCGAAGGCATTGCTGCAACGGCACCCGAGCTGACTTCGCTCAAAA  
TGCCAACCTCGGGTCTTTCTTGAGTTCGGTTCAGTTCGGGCGTTAGCGCCGACATAACCGACTTTTTCTGG  
CGCTGATAAAAAGGCATCGGTACGCCAGCGTAGTATCGAGTTATAGACAAAACGCACGCAGCCGAAAGTCT  
GAGCCAGCAGCTCAGCCTGTTTCGGGGGTTGGGTAAAACCGATATTTATAAGCGCGTTTTCGTCATAGTTCA  
CACTTTAGTCTTATTTGTGTGAAGATAGCAACCAACTTAAAACGGAGGAGCGGGAACAGGGGCGGCTGAC  
GCCGCCGCGCTATCCCTCCCGCCCTAAAAGGACGGGGTTTTACGCGCAACATTGATGA

; Marinobacter sp. ELB17  
; 5 copies ~94% identical to the consensus  
; shares its 3' end with IS605B-1\_MS

; the consensus is 71% identical to ISC2-1\_HM  
; The N|transposon|ATGA targets are found based on comparison  
; to Marinobacter sp. BSs20148

ISC2-1\_MS

GTCAACTACCCCGCCCTAAAGGACGGGGCTTGTAGAGAACACCCTGCAAGCCAGGTTGACCAGGGAAAGC  
GGACACCAACCCGCTACGTTTATCACAGGTCGCTAAGACTCACCGCCGAATGCTTCCTCAGTTCGGCGCT  
CTGGAAGACTGGGATCACGCTGGCGAAAGGTAAAGCGCCGAAGGTTCCGGTGCAGCGCAAGCGGGAGCC  
GGTGATAGACATTCCCGAGGGGAGAGAGGCTTTCGGCCTCCGTTACAAGGCCCGTAAGGGCATTCAATTGAA  
AGGAAAACGATGTCGGTCTTCGTATTGGATAGACGCAAACACCCCTTATGCCGTGCACCGAAAAGGCGTG  
CGCGGCTTCTGCTCGACCGTGGTCGAGCCGTGGTAGTGCGTGCGTATCCGTTTACGATCCGGCTGAAAGA  
CCGTACCGGTGGCATCACACAGCCGGTCCGTATCAAGATCGATCCCGGCAGCAAACCACCGGGATTGCA  
GTGGTGAGAGAAAACGGCCAGAAGCAACACGTTCTGGCGTTAATGGAGTTGGCCATCGCGGCCGCCAGA  
TCAGCAAGTCTCTGGAGCAACGCCGGGCGTTTCGCCGCCGGCGTCGCAATCAGCTGCGGTACCGGGCACC  
CAGATTCCTTGAATCGAACCAAGCCGAAAGGCTGGCTGGCCCCGAGCCTCCAGCATCGGGTCGATAACCAG  
AAAAGCTTGGTGAATCGGCTTCGATCTCTGGTCCCGTTGTGTCTATCAGCCAGGAGCTGGTTCGATTCG  
ATACGCAAAAGATGAAAACCCGGAAGTCAGCGGTGTCGAATATCAGCAGGGCACCTTGCTCGGCTACGA  
GGTCCGCGAATACCTTCTGGAGAAGTGGGGGCGCAATGCGCTTACTGCACCGACAAAGACACACCGCTG  
CAAATTGAGCATATCGACCCAAAAGCCAACGGTGGCTCGAACCGCATCAGCAACCTGACGTTGGCGTGCC  
GGCCGTGCAATCAGGAAAAGGACCGGAAGTCCCTGGTTTCATTCTTTGCCACATCCAAGCGGCTGAAGAA  
CCACCAGGCCAGGCTGGATCGCATCCTCAAACAGTGCAAAAAGCCCTTAAGAGACGCCTCAGCGGTCAAC  
TCAACCCGGTGGGCGCTGTATCAGACCCTGAAGCAGACGGGCTGCCGGTTGAAGTGGGTACCGGCGGCC  
GGACCAAGTTC AATCGCTGTGATTGCGCATTCCAAAGACTCACGCGCTGGATGCGGCTTGCGTCGGAGA  
AGTCGAGATCGTAGAGGGCTGGGACGTTCCAACTTGGCGATCAAAGCCACCGGGCGTGGCAGCTATAAG  
CGCACACGCTTAACAAAGCACGGTTCCCTCGTGGCTATCTGATGCGCCAGAAGCAAGTCCAAGGGTTTC  
AGACCGGCGATATGGTGCAGCGCCGTGGTGCAGGACAGGCACGAAAGCCGGCACCTGGCTGGGCGGGTTCG  
CGTTCGCAAGACCGGCAGCTTCAATATTCAGACAAACAGTGGTGCATCCAAGGAATATCTCATCGCCAC  
TGTGTTTTTAACCCAGCGAGCGGATGGCTACGGCTATCACATCCAACCAACCAACGAAAGGAGGAGGGAG  
ACAGGAAAACGAGTCGCGCTGACGCACGACGCGCTATCCCTCCCCGACCTGAAGGACGGGGTATCCCGC  
GCAAAATG

; Marinobacter sp. ELB17  
; 3 copies >92% identical to each other  
; The N|ATGA target site

ISC2-2\_MS

GTCAACTACCCCGCCGTGAACGACGGGGCTTGTAGAGAACACCCTACACGCCAAGTTGACCAGGGAAAGC  
GGACACCAACCCGCTACGTTTACCACAGGTCGTTAAGACCCACTCCGGTGTGCTACCTCAGCACCGGACA  
CTGGA AAAACAGGGATCACGCTGGCGAAAGGCAAAGCGCCAAAAGTCTCAGTTGCCGCGCAAGCGGGAGCC  
GGTGGTAGACATTCCCGAGGGGAGAGAGGTTTTCGGCCTCCGACACCAGACCCGTAAGGGTGATTATTGGA  
AAACGATATGGCTGTTTTTGTACTCGACAGACAAAAGAACCCTGATGCCGTGCTCGGAAAACGAGCC  
CGGCTCCTGCTGACCCGCAAACGAGCGGTGGTGGTGCAGTGTATCCGTT CAGCATTCGCTTGAAAGACC  
GCACTGGCGGTACTGTCCAGAAAGTCTGTCTCAAAATCGACCCTGGCAGCAAAGAAACCGGCTTAGCGGT  
GTCCAGAGTCAGCGCCCAAGGGGAGCATGTATTGTGCTTAATCGAGCTGATTACCCGTGGCCGCCAGATC  
CGCAAAGCACTGGATCAGCGCCGGGGATGTCCGGCAGGCGCCGGAGTCAGCTGCGCTATCGGGCGCCCC  
GATTCACAACCCGGACAAAGCCAAAAGGTTGGCTAGCGCCAGCCTTCAACATCGAGTGGATAACCACCAC  
CAGTGTCTATCAAACGCCTTTGCGCCTTGGTGCAGGTCACGTCGATCAGCCAAGAACTGGTGCAGTTTGAC  
CTGCAACAGATGGAGAATCCCGAGATCAGCGGCGTTGAGTATCAGCAAGGTACCTTGTTAGGCTATGAAG  
TTCCGGGAGTATTTGCTGGAAAAATGGGGTTCGCGAATGCGCTTATTGCACTGTGACCGACACACCGCTGGA  
AATCGAACACATTGTTTCAAAGCCAACGGCGGTTCAAACCGAATCAGTAACCTGACCATTGCCTGTAC  
GACTGCAATCAGGAGAAAGGTTCTCAAACCCTGGCCGATTTTTTCCAAACCTCCAAGCGCCTAAAAGACA  
AACAACTCGGCTAAGCCAAGTTTTGAGCCAGTGCAAACGCCCTTGCAGGACGCCGCGGGGTGAACCTC  
AACCCGCTGGGCGCTGTTCCAGTCGCTGAAAAACACAGAGCTTCCCGTGAACGTGCGCACCGGAGGACAA  
ACCAAGTTCAACCGTCAAAGACTCGGTATCCCCAAAACCCACGCCCTTGACGCGAGCTTGTGTGCGGCTTG  
TCGAACAAGTGTGTGACTGGCAAAAACACGCTACGGATAAAAAGCCACCGGGCGCGGCAGTTACAAACG  
CACACGCTTAACAAAACACGGCTTCCCTCGCGGTTACCTCATGCGAGAGAAATCAGTTCACGGATTCCAG  
ACCGGCGATATGGTTCGAGCGATTGTCCCAACCTGCAAAAAGGAAGGCACCTGGCTAGGCCGGGTGCGCA  
TCCGAAAACCGGCAGCTTCAACATTCAAACCTCGGACGGAGCCGTTCAAGGCATTCATCACCGGCACTG  
CCGGCTCATGCAAAAAGCGGATGGCTACGGCTATCACCTACAACCACACCACAAAAGGAGAAGGGAAA  
CAGGAAAGTCTGTGCTGCTAACGCACGACGCGCACTCCCTCCCCGACCTAAAAGGACGGGGTTTTCCCGC  
CAAAATCG

; Ktedonobacter racemifer DSM 44963

```
; FRAGMENT 1448433 -> 1447073
; gi|297546893|gb|ADVG01000004.1|
; shares both termini and target with ISC2-1_KR
; Terminal palindromes:
; head 9 29
; CCCCATGGCGAAAGCCA-GGGG
; |||| |||| |||| ||||
; CCCC-TGGCTTTCGCCATGGGG
;
; tail 1315 1344
; CCATGTCTAAACCCAGGGGTCCACGCATGG
; |||||:|:|:|||| ||||:|:|:||||
; CCATGCGTGGACCCCTGGGTTTAGACATGG
;
```

IS605B-1\_KR

```
GTCAGATACCCCATGGCGAAAGCCAGGGGCTTGTCCCTAAGCCGAAGCGTGAGACGAGAGGACGTCTGAC
AGCGACCCACTCAGGACAGGTCTACCACCCTGAGCAAGACAAAATTTGTCTCGGATGTTGTATGCAGCAT
TGAGGTCCTGCATGAAGTTGATACCCGCAGGAGCGACAGTGAAAGACCGATTGAGAACGCCGATTGTTGCG
TGCTTGATGCCACAACGAGAACAGGTCTGCGAGGTATGACGCGGATCAATGCGTTCACCACCATTCCC
TGTTCTTGCCCTTTGTAGACAATGAAGCCGTACAACCTGCGCAAAGGACCAGGAATGCAACTTACGTTGTC
CTTCACCTTTGCGATGTCGGACTCCTTCTCGAATATTGGTCAAGTTCCTCAAGCACAAATTGTTGCTCCAGG
GGTTACGCTTTTGACGATGCGTTTGGAGAGCACATGGTCCACAGTCCCAGGTGGAAAAGCATCTGCTTACGC
GACAGCTTTTTGAGATGCCGTTTGGCAGACGTGGTTCCTTTGGACTGAAGTTTGCAGCGGAGACGGAACG
TACGGCGGTCAACCTCTTCCAGTGGCGAGAGCCAAGGAAGTGACGGTTGGAAGTCACAGCAGGACGATT
CAAGCCCAAGTCCACACCAACAACCGTGTCTATTGGCTTGAACAACAGGTTTCGGGAACATTGACCACGACA
TGCAGCCACCATTTCCCTTTGCGGTGGATCAGGTCAGCAGTAGCAATGTTACACCACGATATCGCTCAC
TGAAATGAGGAACGGTAAAGGGGAAGAGTCATTTTGCCTTGCCTGGTTCGAAACCGAATCGTTTGTGTTTC
CCAATTGAGGGAGTAGGTGTGAACATTGTAACGAACCGCACACTGCTCAGAGGAAGGGCAACGAACAGGC
TTGAAGAGAGGAGCGGGTTTCCCCTGTTTCTGTGCGTTAGCAACCTTTTTTCGGATAGGACGCTTCTTCT
TGGCTTTCCAGGTGAAAGCACTGCGAAGCGTTTTCGGTGGCTTTGACCCGAGCCTGAATGAGCAAGTCACT
CACCAGACCAGGACACAAGGATTTCTGCTCTCGTAGTAGGTGGCATGATGAAGCCTGACACCGTTCCTCTCG
CAATGCTGCCAACCATAGACACACACATGATTGTAGGCAACGGTAAACTGCACCAACGTTTCTGCAAGA
CGTGGGACTGTTCTGTATTTCGGTTGAAGTTGAATCCGCACCGTTCATCCATGCACAAATTATACCATAT
ATGTGATATTTGTGCCAAATAGTAAAAAAGAAAGGAGTGCGCCATGCTCCTCCCCATGTCTAAACCCAG
GGGTCCACGCATGGCGCGGTTCTTATGATGG
```

```
; consensus from 4 copies
; common 3' terminus with ISC2-2_KR
; Terminal palindromes:
```

```
; head 1 36
; CTGAAGCTCCCCGCGCTAAAGCGACGGGGGTTCCAG
; |||:|:|:|||| |||| |||| |||:|:|:||||
; CTGGAACCCCGTCGCTTTAGCGCGGGGAGCTTCAG
;
```

```
; tail 1777 1821
; GCGGCGATTTCATCCCCGG-CATCAATGACCGGGGCTTTCTCGCCGC
; ||||| | ||||| -|||:| -||||| | |||||
; GCGGCGAGAAAGCCCCGGTCATTGATG-CCGGGGATGAATCGCCGC
;
```

IS605B-2\_KR

```
CTGAAGCTCCCCGCGCTAAAGCGACGGGGGTTCCAGGGGTTTCGGCCACGCTTCCCGTCTTCTCGCTTC
AGCAAGAAAGCTGGCTCTAGTGGTGGTCCCCCTGAACTTTTCGGGCAGACGCGCTCTCGCACGAGTCAAAC
CCATGCTTCGGGGCAAGGTCTGCCCTCTTTTCGCGCGTTGTGTGAGACGCTCGTGTGCTGCCCGCAGGCG
CGCTTCCGCACCTTCCCAATACTCCTGGTATCGGGCACACGAGGGAATGGGGTCTGCTGGATCAAGGTAG
GCAGCCAGAAACGCCGAATACAGGTGCGGTTGCACGGGACCCACGCCACACGCGCACTGATGCCAACGCT
GCGAAAGCGGCTTCTTGAGCTTCTTGCCACAGCCATGACACCACTGGCTCAGCGCGGTGGTGCCTGTGGG
GACGCGCCACCAGGATGCCGCCCGTACTCTCAACGGTGCCTCAACAGTTCCACAAACATCCCTGGTGC
TCGCAGTCCCACACTCTTGCCAAATTGCCTCTGCCATGCCTTATAGGAAATCTTTTCGATGATGATGGTG
GTGCCAGCTTCACTACCTGATGCACTTTGTGCCATGCAGGCTCTTTCGATGCGCTACGAGTTTGCCT
CTTTGCTCGCCTTTCGTTGCCGGGTGGCCTGGTAGCGTACTCTGCTTCCAGTGCCGCTTTTTCTTGCC
```



TTGTTTTTTGATGCGCCCCTTCTCGTCGTAGTGCTCAGGATTGGCCGCCCTACGTTGCCGATCCATCTGC  
CGTTGCAAGCGACGAATGGCTTTAGCATCAGGAGCCAGTTGTGCACAGAACACCTCCAGGCTTGCCCTCTC  
CTTGCTGGGAAAGAGGGCCAGGGTGGAGGGACCAAGGTACCCGCAACAATACTCGTGCCAACTGGGTG  
TTTTTCTTTTGGTGGGGCTTGCCCTCCAGTGCCAGTTGCACGACATAGCGATAACCCCTCTTCATCAGCG  
CCCCCGCTCTGGGGCTGCTGGCAGGACGCTGGATGAGGCGGGCAAACCTTGATGCGGTGCCTGAGCCCAT  
GGGTACCACCTTCATCCTTCCAATCGATGAGGGCGGGCAGCGGGTCTCCGTTCCAGAGCAGAGACCCCGC  
GTTTCCCTCCTCGGGTGGTTGCAGGACGAAGCGCAGGCTGGTATCGTTGCGTTTATTCTCAATGCTGGAG  
AAGCCGCGTCTCGGCTCTTGAACGCACCCGCTTTGCTTTGCCAGGCAGACGCGATTGAGGGCACGAT  
AGGCGCGAGTGGCCAGGGTTTGGGCCAGCACGGCCTCGATGTGCTCGGCAATCCAGCCCACGCGCAGCCC  
CTTGACGGCTTCATGCAGGGCGGCTTCGGAGAAGCCATGCGCCTTGCGCAAGGCGGAGAAGGCTGCCGCT  
CGTTCCGCTTTGTGGGTGCGAGGAAGGGCGGGCCTCTTGCCAGGCGGGTTCAGACCGCATGCGGCGCA  
GGCGCTGTTGTCCTTGGGAGAGGATGGCGTTGTAGAGCTGACGAGCGGCTTCCAGATGGGAGCGCAGGCG  
GGCGGCTTGCCCTGGATCGACGGCCAGGGGCAGTTCAGCAGAAAGGTGGGGGTGCGAGGTCGCTTCTCC  
TGCTGTTCCCTTCTTCTGCGTTGTCCCTGACACTTCTTCGGCATTTGTGGCCCTTCTTCGAACACACACG  
TGATCTCGATCCACTGACGTCTATTGTACCAGAGGAACGGGAAGAACGCAAGTTCTAGGTATCTGACCCT  
GCTCTCTTCTCTCATCCAGCAGAGGGCGGCGATTTCATCCCCGGCATCAATGACCGGGGCTTTCTCGCCG  
CGTTCTCTGTAA

; the consensus was derived from 6 copies >99% identical to it

; common ends with ISC2-3\_KR

; Terminal palindromes:

;

; head 11 30

; CCCATCGCTGAAGCGAGGGG

; ||| |||| |||| |||

; CCCCTCGCTTCAGCGATGGG

;

; tail 1430 1474

; CGCCTGCTTCCCTCCCCGCTTTGAAAACG-GGGGCATCCGCAGGCG

; ||||| : |||| |||| |||| ||| : |||||

; CGCCTGCGGATGCCCC-CGTTTTCAAACGCGGGGAGGAAGCAGGCG

;

IS605B-3\_KR

AGTCAGTGACCCCATCGCTGAAGCGAGGGGCTTGCGTCTGGACTCCACCGCAACTCGGCATACCTTGAGA  
GGCGTGCCGCTTTGGCTTCGCTGTCCGACGTATCAGGGGCTACCGACAACAGCCCCGTTCTGGCCAGTC  
TTGCCAAACCAGAAGCGTTCGACGACCAGATTCCCTCGCTCCCACCAGATCCGCATGGAGCGTGTAAATGG  
CAGTTCTGACAGACAAAGACGAGGCCCTTGCTGGCCGATTGGCCGCGCGGTGTGCCCGCACCTGGGGC  
AAGCCTGGCTGCTGTAATCGGCATCGACTTTGATGGCCACTGAGCCGGCGAGCATCGCCTTGTAGGCAAT  
CATGGCCTGCAGTTGGGCAAAGGACCATTGGGAGCGCCGCGGTTTTCCCTGCGCTGCTTGGGGGAGACC  
AGCTCGCTGCTTTTGCCTTGCTTTGTGCGCCGGTGCTTCTTTGGCTTGGTGCCTCTCGAATGTCTGTTA  
GCTCTTCCAGCCCGATGAGGGACGCGGGGTGCCTATGGATGATGCGCTTGGAAATGCAGTGGTTGGTCTC  
AGCTTTCAACCGTCTCTCTCGCTGCTCAATCGCACGCACTTTGCGCATTGCGCCGCGAGTGCCTTTCTGC  
TGAAGTCGTTTTCTCAGGCGGGTGTAGTGGTCAGCTTGGGCAACCGCCTCTTTGCCAAAAAGAAGAGAG  
GATCACCCGAGCCAGTAGTGGTGCAGGTCACCGCCAGGTACCGCCGTCGACGTCCACCCCAACCACTTG  
GGGAGGTCGCTGGCTCGGGGTGCGGCAGTTCAGGGAGAGCGCCACCAGCAAGTAGAAGCGCTTTTTTC  
CGCTGGTCATAACCAACTGCGCCGTACCGATGGAGGTTCCCTGCTCGATGAGGGCCACATGGCGCTCGT  
AGCCGCTGTAGGGAAGGATCAGCCGACCGGAGAGGTCAGGACCGAAACGCGCTGCTCGGTTTTGAAGCC  
GTAGTCCCAGCCCTGCTGATAGGTCACGGTGGGAGAGAGATAGCGGGGCGGCTGGTTCGAGTCTTTGTAG  
CGTTTCTTGGTCACCCCGGCTTGCGGCTGGCGGCATGCTTTTTGTATTTGGTCCACAAGCCCTTGTAGG  
TCGCTCCTACCTGGCGAGGGACAGAACAGGCCATCTGCGCCGCAAGGCGTAGAGCACCCGAAGCTCTTG  
ATAGGTGCCCTCCTGCAAGCGCCTTTTGCTGCTCATTTTGCCATGTTTGAAGGCGTAGCGGCTGACATAA  
TTCAGCGCGTCGCGATAGGCCAGCTGCAGGTTACGAAGCTGGGCGAGCTGCTCGCTGGTGGTGTGCAACT  
TGAGTTTGGCAATGATGGTTTTGTTTCATAGTCTACTTTTTCTTTTTCGGGGCAGCGAACCAGGAAAGGCTC  
CCCCCTCCGTTGCCCCACTCCGACAAGGAACGCCTGCTTCCCTCCCCGCTTTGAAAACGGGGGCATCCGCA  
GGCGATGTCCGGTGA

; Ktedonobacter racemifer DSM 44963

; the consensus was derived from 3 copies ~97% identical to it.

; Terminal palindromes:

; head 9 29

; Q: CCCCCACATTGAATGTGGGGG

```
;      ||||| |||||
;      S: CCCCCACATTCAATGTGGGGG
;
; tail 1296                      1323
;      Q: GGGCAAGGGAAGCCACCCTTCCTAGCCC
;      ||| | |||:|:| :|:| ||| |||
;      S: GGGCTAGGAAGGGTGGCTTCCCTTGCCC
;
```

ISC1-1\_KR

```
GTCAAGAACCCCCACATTGAATGTGGGGGCTTGCTCAAACGGCTAGAGCAAAGCAATTCTTGACTAGTG
GGCTTTGTTTTTCGGAACAGACAGCAGCGTGAGGGGCTACAAGGATGTCCACGGACGCCACCCTAATCCG
TACCACTCCTAGCCACGCCGAAGCTGATGCTACGGATAACAATCGTAGCTACGCCTCTCATGCCACCACGA
AGGGTCATATTCACCCTGGCTTGACCAGGAGAAGGGCAATCCCTTATGCGAATACCTGTTGTGATACAC
GCGGGATCGCGCTCATGCCATGCACACCGGCGAAAGCACGCCACTTGCTCAAAAGCGGCAACGCACGACC
CAAGCGCAACAAGCTCGGGCTGTTTTACGTCCAAGTGGAGCTACGAACAGGAACCAGACAACCAATCCCTC
GTGCGAGGGTTCGATCCTGGGTGCAAGTTTTGAAGTTTTGAGCGTGGTTGGCACCAAAGACACCGTGTCA
ACCTGATGGTGGAAACACCCGATCATGTCAAAGGTGCGGTTGAGACCAGGCGCACGATGCGCAGGGCCAG
ACGGCAGCGCAAGTGGCGCAGGCCAAAGCGTTTTACAACCGTCTCAACCGCATGCAGCGCATTCCCCC
TCAACGAGAAGTCGATGGGAAGCCAAAGCCAGGATTTGTTGCGCACTTGCGGACCATCCTTCCATTACGG
ATGTGGTGGTAGAAGATGTGCAGGCGTCAACGCAAGGGCAAAGGGGGCACGTGGAACGGCTCCTTTAG
TCCTGTCCAAGTGGGGAAGGAGCATCTTACCAACTCTTGCGAGAGATGGGACTCACCTACATCTGCGT
GAGGGCTGGCAGACGAAGGAGCTTCGAGAGCAGCATGGCCTCAAAAAGACGAAGAGCAAGTCGAAGCAGT
CCTTTGAGTCGCATGCGGTGGATAGTTGGGTGCTCGCAGCCTCGATCAGTGGGGCGGAGCACCCACCTG
CACCCGTCTGTGGTACATGGTGCAGCCATCTTGCATCGTCGCCAACTCCATCGTTTGCAAGCGTCAAAG
GGAGCGTGCACAAGCCCTATGGGGGAACCCGCTCATTGGGCGTGAAACGGGGGAACCTTTGTGAGCACA
AGAAATACGGACGCTGTACCGTCGGCGGAGTTGACCGCAAGCGAAACACCATCAGCTTGCACGAATACAG
AACGAACACACGACTCACGCAAGCAGCGAAAGTGGAGACCTGTGAGTCTTGACCTGGCTGTCTTGCGCGC
TCCTGTTGATCAGAGGAAAGCACACATCGTCAAAGGGCAAAGGGAAGCCACCCTTCCTAGCCCCAACAAA
GGAACGCCTGT
```

```
; Oceanimonas smirnovii ATCC BAA-899
; 3 copies, ~97% identity to the consensus
; N|ATGA target site
```

; terminal palindromes:

```
; head 9-28
; Q: CCCCTCCCTAAAGGAAGGGG
;      |||||:||| |||:|||||
; S: CCCCTCCTTTAGGGAGGGG
```

```
; tail 1272-1292
; Q: CCCCGCCCTAAAAGGACGGGG
;      |||||:||| |||:|||||
; S: CCCCGTCCTTTAGGGCGGGG
```

IS605B-1\_OS

```
TTGACTGCACCCCTCCCTAAAGGAAGGGGATTCCCAATTCACCGAGAACCGGACACGGAGACTGGCCCCA
TGCCGCTTACATTCTCTCAAGGGCTAACACCGCCAGCCCGGCGGCTTTAATGTTTGTGCGGGCGTTGAT
GTGCGGGTTCATGGTGTGCACACATTCGGGGCAGTCCATTTTCTGACCGACAACGGCAGCGACGACAAG
GTATGCCCGCAACCCGAACAGCGTTTGGAGCTGGGGAACCACTGGTCAATGGCGACCAGTGAGCGACCGG
CCCATTCTGCCTTGTACGCCAACTGGCGCACGAACTCGCCCCAGCCTGCATCGGCAATGGCTTTGCTCAG
TTTTCGGGTTGCGGATCATGTTTTTCACATTGAGGATTCGACGCAGATCACTTGGTTCTCGTTAATCAGT
CTGCGGGACAGCTTGTGCAAGTTGTCTGTGCGCAATCGGAGATCTTGGCGTGAAGTTTTCGCCACCTTCT
GCCGGCCTTTGGCGCGTGGCCGAGCCGAGCTTTTTCTTGCTCAGTCGGCGCTGTGCCTTGCCAGTCT
GGCGGCGTATTTGCGGTTATGGCGGGGATTGCCGACCCGTTACCCTGGTTCGGTGATAAACAGATCTGTC
AGGCCAGATCAATGCCGGTTCATGTTGGGAGTAACCGGCAGTTTGGCGGGCGGAACTCACACAGGCAGC
TCACAAAGTAACGGCTGCCGAGTCTTGGAAACGGTACCGGTACTGGGGTTCGGGGCAGTTACGGCT
CCAGCGAATATTCAGCGGGTTTTGCTCTTGCCAGGTACAGCTTGCCGTCCTGGTATTTGAAGGCCGAG
CGGGTGAACCTCCGCCGACTGGCGGTGCCGCTTGTGCTTAAATACCGGGTACTTGGCACGGCCTTCAAAGA
AATTTTTGAAGGCGGTTTTGCTGGTGGCGCAGGCATTGCTGCAAGGGCACACACGACACCTCAGACAGAAA
```

CGCCAGCTCAGGATCTTTCTTGAGTTCGGTCAGCCGGGCGTTAGCGCCAACGTAGCCGATTTTTTGCTGA  
CGCAGCTCAAAAGCATCAGTACGCCAGCGCAGTATCGCGTTATAGACAAAACGCACACAACCGAAGGTCT  
GAGCCAACAGCTCAGTCTGTTCCGGGTGTCGGGTAAAACCGATATTTATAAGCGCGTTTTTGTATGCGCTT  
AGTTTAGTAAACCACTGTATAGATAACCAGTTTAAAAGGAGAGGCGGGAACAGGGGCGGCTGACGCCGCC  
GTGCTATCCCTCCCCGCCCTAAAAGGACGGGGTTTCCCGCGCAAATTTG

; *Methanosarcina lacustris* Z-7289

; 12 full-length copies 96% identical to the consensus

; GT|GA target, basen on ISC2-1N\_ML and cross-genome comparisons

; ISC2-1N1\_ML - related nonautonomous family

ISC2-1\_ML

CAACTACCCGCCAATAAATTGGCAGGCATGTAATATTGCTTCGGTTGACCAGCTTAAGTATTAATTTACT  
ACGTTGGATTTGTCATAACACCTGCAGGTGCTTCCTCAGCTTGTAGCTCTGTTGTATAATATTAAGTT  
CTGTAGGGTAGGAACGGTGTATTATGCTTAAACAAGCATTTCCAACATTAGCGAGAGGAGACACGAAAGTG  
CGTTACCGGAAGCAGGATTCATCTTACTTCTGAGATCGGAGAAATCCAATTATGATCTTTGTATTAAACA  
AAAACAAACAACCGTTAAGCCCCTGTCATTCAGCAGTTGCCAGAAAATTGCTTAAAACAGGAAAAGCGGT  
TATTCATAAAAAATATCCATTACAATTCGACTAAAAGAGTTGAAAAATTCGGAAAATAAAGCTGAATTC  
CGATTAAAATAGACTATGGAAGCCGACACACAGGTTTAGCTATCTTAAATGGTTCATAAGTAATTGGGC  
TTGCTCAAATCCATCACAAAACAGTATTAAGCAATATGGATAGCCGCAGAGCAATGCGGAGAACTCG  
ACGAAATAGAACAACAGGTATAGAAAACCCAGATTCAACAACAGAAAACGAAAAGAAGGTTGGCTTCCC  
CCATCCCTGCAAAGCAGGGTAGACAACATCCAAAATGGGTTAATAGACTGCAAAAACCTGTGTCTTTGA  
CTCATATTTTCGTATGAAAATGCCAAAATTTGATACCCAGCTAATGCAAAATCCTGAAATTTAGGTATTGA  
ATATCAGCAAGGAGAACTTCAGGGGTATGAAGTTAGGGAATATTTGCTTGAAAAATGGAATAGAAAATGT  
GCATATTGCGGAGCAGAAAATGTTCCGCTTGAAAATAGAACATATCATACAAAAGCAAGACATGGAACGA  
GCAGAGTTTTCCAATTTAACATTAGCTTGCAGAACTTGCAATGAAGCAAAGGAACTAAGACAGCAGAAGA  
ATTTGGGTATCCTGATATTTCAAAAACAAGCAAGAATACCACTGAGGGATGCTACACTTGTACAGCTACA  
CGATGAAAAGTCTACAATGTTCTTGCAGAACTGGACTTGAAGTCAATGTGGCACAGGTGCAAGGACGA  
AGATGAATAGAATCAGGTTGAATCTACCCAAAGATCATCATTTTGTGCAATTTGTGTTGGTGCTTCAAC  
ACCAGATAAAAATAATTTCAAAAACAATTCAGTACTTCACATAAAAAGCAAAAAGGTAGAGGATCACATTGC  
AGAACCAATCTTGATAAGTACGGATTTCTTAGAGGGTATCTGAGTAGACAAAAGAGTTTCTTTGGATTCC  
AGACAGGAGATATTGTTAAAGCGGTTGTTCCGAAAGGAAAATACAAAGGAATTCATTTTGGTGCTGTAGC  
TTGTAGAAAACAGGTTATTTTGTATTTAAAATAAAGAAGGTGTTAGAATAGGGCAGGGAATTAATCAT  
AAATATTGCAATATTTTGTAGTAGAGCAGATGGATACGAATATGCCACAGAGCATTTGGAAGTTGACGGAA  
TTCTCCTACGACTGAAGTCATAGGCATCCTTCTTAATTTATCGT

; *Methanosarcina lacustris* Z-7289

; 38 copies ~99% identical to the consensus

; gt|ga target

ISC2-1N1\_ML

CAACTACCCGTCACTAAAGTGGCAGGCATGTAATAGTGCCCCGGTTGACCAGCCTTAGTCTTAATTGACT  
ACGTTGAAAATGTCATGATACCTGCGAATGCTTCCTCAGTTTGTAGCTCTATCGTGTAGCATTAAAAGTC  
CTGAGAGGTAGGGGCGGTGTGTTACACATAACAAGCATATCCAACATTGGCGAGAGGAGATACGAAAGTA  
CGTTACCTGCGGAGGAAACTCGTTTCCAAAGCAGAGTGGAGAAATCCAACATGAAAGGAATGCCAGAAA  
ATTGACGGCATTCCTCTCATGACTAAAGTCAAAGCATCCTGCCTTATTTTTTCGT

; *Clostridium haemolyticum* NCTC 9693 plasmid p1Ch9693

; JENX01000125

; GT|AA target

ISC2Y-1\_CH

CAACTGCCAACTACCCATAAGGGTAGTGGCTTGTAAGAAATTGCAAGTCGGTTGAATAGCCTAAGTCTTA  
AATGACTACGATTATTAAGAATATATAGGTACTTCAAGATACTTCTCTAGTCTTGAACACTACGCTTTAA  
CATTAAACATTTCTGATGGCAGGAAAAGTGTGTTAAAGATACAAAACCTTTTTAATCATTGGCGAAGAGA  
ACTTACCACCGAAAAGGTGAGGTTAAATTATCTGAAAGGATTAATTTTATGGTATATGTAATAGATATTA  
ATGGGAATCCATTAATGCCAACAAATGAAGCAAAGCAAGAAAACCTTTTAAAGAATAAGAAAGCGATAGT  
TAAAGAGTTAAAACCATTTACTGTTCAATTAATTTATGAACTAGTAATTATACTCAAAGAATAACTTTA  
GGAATTGATAGTGGATATTTGAATATAGGTTTTAGTGCAATAACTGATAAGAAAGAATTAATAGTTGGTG  
AAGTTAAACTTCTTCAAGGAATAAAAAGATAGAATACAAGAAAAGCAATGTATAGAAGGCAAAGAAGAAA  
TAGATTGAGATATAGAAAAGCTAGATGGAATAATAGAACCAAAAGTAAGCACAAAGGTTGGTTAGCACCT  
AGCTTACAACATAAATTAGATAGTCATATTAATTTATTGATAGTTTATATAATGTACTACCTATAACAA  
AATGCGTTGTAGAAAATAGCAAATTTTGTATACAGAAAATCAAAAACCTAATATAAGTGGTGAAGAATA  
TCAGCAAGGAGAAATGATGGGGTTCTGGAACCTAAGAGAGTACATTCCTTCATAGAGATAATCACAAATGT  
CAAAAATCCTAATTGTAATAAATAAGTCTAAGAACAGATTTTAGAAATTCATCATATTAAGTATAGAAGTG

AAGGTGGTTCAGATAGTCCTAACAAATTTAATTACACTTTGTAGTAAATGCCATACTTCACCTAACCATAA  
AAAAGGTAAATTTCTTTATGATTGGTGCATAAAATGGAAAAAAGTTAGAGGATTAAAGATGCTACTTTT  
ATGAGCATGATAAGATGGTATTTAATTAATACTCTTAAAGAAAAACACAGTAACATTTCAATAACCTATG  
GCTATATAACTAAAAATCATAGAATTACACATAAAAATTAACAAAAACACATTATAATGATGCATTTGCGAT  
AGCAAAGGAATTAATCAAATTAGAAATAATGATATATTTAATGTATCGCAGGCAAGAAGGAATAATCGG  
TCTTTAGAAAAGTTTATGATTGTAAAATAATAGATGTTAGAAGTGGTAATAAGGTTTCAGGTGGAGACT  
TAAACTGTGGAAGAAGGACTAGAAAATAAAACCATAGTACAGAAAACCTTAGAATTTATAGAGGTGAGAA  
GATTTCAAAGGTCAAAGAAGAATTAGAAAACAAAAATATTTCTATCAGCCAAATGATTTAGTTAGATAT  
GAGGGTAAGATTTATACAGTAAAAGGAAGCCAAAAATGGTGGTAAAATATGTTGCACTTAAAGAGATTA  
AAGTGCCTAAAGTGGATTTATTAACACCTTATAAAATCCAAAAAGGATTTGTTTATGAAATATATAAGTA  
AAAAATCATAGTAAATTTTTATTAATGACACATTTGATATTTGTTTGTAAAGTATAGAAAAAGTTATTAAT  
AAGACTTGGTGTATGATATTAAAAAACTGTTTTATGCAATAGCAGAAGAAAAAGATTTAAATATAATAGAA  
ATGGAAGTAGGCAAAGATCACATCCATTTATTAGTTCAATATTCTCCAACGCAATCAATATTGCAGATTG  
TAAGATGGTTTTAAACAAATTTCTACTTATAGGGTTTGGAGAGTTGGTAAAACCCAATACTATTTAAATAA  
TCATTTTTGGCAAGAAAGAACTTTTTGGAGTGATGGATATTTTGCCTGTAGTATTGGTAAAGTGAGTAAA  
GAAACAATAGAAAAATATATACAGCAACAAGGGTAAAACAATTCATCACCTACCCTAAAGGGTACGTGT  
TTTCTTGTAAATGTATTAT

; Anoxybacillus flavithermus TNO-09.006

; 6 copies ~97% identical to the consensus

; GT|GA target site

; 66% identical to ISC2-1\_ML in archaea (71% protein identity).

; common termini with IS605B-1\_AF:

; IS605B-1\_AF 1 CAACTACCCAACGACTAAAGCTGTGGGCTTGCAACTCCC 39

; | | | | | | | | : | | | | | | : : | | | | | | : | | : | |

; ISC2-1\_AF 1 CAACAACCCAATGACTAAAGTCATGGGCTTGTAAGCCCC 39

; IS605B-1\_AF 1305 TTCCTCCCATGCTTGAAAGCAGGGGTTTCC-TGCGTGA 1342

; | | | | | | | | : | | | : | : | | | | | | : | | | | - | | | | | : |

; ISC2-1\_AF 1528 TTCCTCCCGTGCCTAAAGGCAGGGGCTTCCTTGCGTAA 1566

; Terminal palindromes:

; head 3 32

; ACAA-CCCAATGACTAAAGTCA-TGGGCTTGT

; | | | | | | | | | | | | | | | | | | | | | |

; ACAAGCCCA-TGACTTTAGTCATTGGG-TTGT

; tail 1534 1553

; CCCGTGCCTAAAGGCAGGGG

; | | | | | | | | | | | | | | | |

; CCCCTGCCTTTAGGCACGGG

ISC2-1\_AF

CAACAACCCAATGACTAAAGTCATGGGCTTGTAAGCCCCATGTTGACCAGACCAAGGCTTGAAACAGAGC  
CTACGTTATAGATGTCATGACACGTTCCGGGTGCTTCTCCAGCCCGTTCCCTCTGTGCGTGAAGGTAAACA  
AGCGTGGTGGGTAGCGCTAGTGTCTTGCACATAACAAGCATCTATAACATGGTGCAGGAGAATATGACCT  
GCTTTATGCAGAGGAAAGGGGAGAACCTATGGTFTTTGTGTTAGACACAAACAAACGTCCGCTTGCTCC  
TTGTCACGAAGCAGTTGCAAGAAAGCTGTTGAAAACAAGGGAAGGCGGCGATTTACAGGCGATTTCCATTT  
ACCATCATCTTGAAAAATCAGTAGACGAATCAGAAATTAAGCAACATATCGGCTAAAAATCGACTATG  
GAAGCAGGCATACAGGATTAGCGATTTTGCAGGACAAGAAGTGGTATGGTTAGGGCAACTTGACCATCG  
CACAGACATCAAGGAAAGAATAGATAAAAGGCGTGCTTTTCGTGAGCAAGACGAAATCGAAAAACAAGA  
TACAGAAAACCACGCTTTCTGAACCGCAAGCGAAAGGAGGGGTGTTGCCACCATCGCTAGAGAGTCGTG  
TGCAAAATATCCAAACATGGGTGGACCGTCTAAAGAAGATATGCCCGATTGGGCATATATCGTACGAGAA  
CGCAAAGTTTGACACGCAACTCATGCGAAATCCTGAAATCAATGGTGTAGAGTATCAACAAGGCACGCTA  
CAAGGATATGAAGTACGGGAGTATTTGCTTGAAAAGTTTGGGCGGAAGTGTGTTATTGCGGAAAAGAAA  
ATGTTCCACTTGAAGTGGAGCATATCATTCCAAAATCGAGAGGTGGAACAGACCGAGTGGATAACCTATG  
TCTTGCCTGTCATGACTGTAATCAGCGCAAAGGAAGTAAGACAGCAGAAGAATTCGGGTATCCGCACATT  
CAAAAAATGGTCAAAGAAACCCTAAAGGATACAAGTGCTATCAAACTCGACAGATGGAAAGTGTATGAAG  
TGTTAAAGCAGACAGGATGCGATGTCGAGTGTGGAACAGGTGCACGAACAAAAATGAATCGTATTCGTTT  
AGGCTTGCCGAAAACACACTATTTTGACGCTTGTGTTGTAGGCGAAAGCACACCCTCCACTTGCAATTTCC

AAAACAAAAGAAGTGTATTATTTATCAAGGCCAAAAGGGCGTGGTAGTCGCTCTCGTACAAACCTAGATAGAT  
ATGGCTTCCCAAGAGGTTATCTTGCAAGACAAAAATCTTCTTTGGTTTTTCAAACAGGGGACATGGTTAA  
GGCTGTTGTCCCAAGAGGGAAATATCAAGGCGTTTGGTTTTGGCGAAGTCGCATGTAGAAAGACTGGAAGT  
TTCGATATTAAGGCAAGGACGGAAAGCGTATCGCACAAAGGAATAAATTATAGATATGTCCAAGTCATTC  
AGCGATTTGACGGATATGCTTATGGAAAGGGGGTGGCGGAACTTGCCTAAGGTGCAATTCCTCCCCGTGC  
CTAAAGGCAGGGGCTTCCTTGCCTAAGTTTCGT

; 3 copies, 99%; GT|GA target site  
; common termini with ISC2-1\_AF:  
; IS605B-1\_AF 1 CAACTACCCAACGACTAAAGCTGTGGGCTTGCAACTCCC 39  
; ||||| |||||:|||||||:::|||||||:| | :|||  
; ISC2-1\_AF 1 CAACAACCCAATGACTAAAGTCATGGGCTTGTAAGCCCC 39  
;  
; IS605B-1\_AF 1305 TTCCTCCCCATGCTTGAAAGCAGGGGTTTCC-TGCGTGA 1342  
; ||||| |||||:|||:|:|:| |||||:| |||-||| |:|  
; ISC2-1\_AF 1528 TTCCTCCCCGTGCCTAAAGGCAGGGGCTTCCTTGCCTAA 1566  
;

; Terminal palindromes:  
; head 27 52  
; GCTTGCAACTCCCCAGAAGTGCAAGC  
; ||||| |:|: |:|: |||||  
; GCTTGCACTTCTGGGGAGTTGCAAGC  
;  
; tail 1311 1330  
; CCCATGCTTGAAAGCAGGGG  
; ||| |||| | ||| |||  
; CCCCTGCTTTCAAGCATGGG  
;

IS605B-1\_AF

caactacccaacgactaaagctgtgggcttgcaactccccagaagtgcaagcggatggtatcctccttcc  
ttcacttgggggttgcacagggcaggttgacaactacccaacgacgcaggtcatgctgtgctgcttccct  
caacgatgtactcgattccttttctgtgaaaggttcatggcacaattcgggtcatgcttggaggtatatcc  
gcatgttcgacaacaaaacgtgtgctgttttcttatttctggttctctctgtatgtccgcattttgga  
catgttgggatgtgtatgttgggtctaccacaatcactttggctcgggtgttgggtgctttgtactega  
tttttctttaaatacataaaacgccaagataaccatttcataccgatgggtaacggacactttttctgt  
tctttggcgaacacctgttaaataccttaacacaaacagcgtgttcttaccataacgctcaacgagtgcc  
ttactgatgcaatgggtgacatcttgcacccaacggttttctcgttgaccgattttctttaaataccttac  
gagcagacggagttgcttttttgtagttgtctgagggtgtttatactttgctcgttgggttggat  
gtgtctaccttgaaaaataacgtctgtccggttgaaatcataaacagtcgcaagaaaatttacaccata  
tctacgccaaccacttggcaaatgtgatgaaggttgccttctccatttcttggatacagggatagga  
gaaaccacttttgatgtttattcactaactttgctgttccaaacgctcatgttccgctcgaatacgtttc  
aagttcttctggttgaaaaggaactttgattcgtccttctaacgtattgatggaaaacaaccctttgggt  
aggctgtaatctcgattaaaaacgaggtctatttgcggttttttaaacgcaatctgacaacgcttatgtc  
cattgggttgggttgggtttatattttgcaatcaccggttttaacacagactgcgcccatttgagatttaa  
gcaaatgtagagcgaagtttgcggtacgtcatcttgtgaagtttggcttgcaacaggggtgttttctttg  
tatacacttccgacaccgcatcgcacgatcacgatatgcttgcacgcttttttgaagaagttgttctt  
gttcagatgtcggtaaaatttttaatttttgcgtgttaaagtcaatttcatgtcctcaccacctttcactaa  
ttttattttatatttttttagcgaaaaataaacaacacgcaattcctccccatgcttgaaagcagggg  
tttctcgtgattaatcat

; Anaerostipes hadrus strain PEL 85  
; Its protein was found among most distant ones from the original set  
; 2 copies 97% identical to each other  
; Terminal imperfect palindromes:  
; head 9 29  
; CTCGGCCATTGAATAACCGGG  
; |:| |:| |:| |:| |:| |:| |:| |:|  
; CCCGTTATTCAATGGCCGAG  
;  
; tail 1760 1782  
; TCTCGGTCATTGAATGGCAGAGA

```
; |||| |:|||| ||||:| ||||
; TCTCTGCCATTCAATGACCGAGA
;
```

```
; termini are similar to these in IS605B-1_AH and IS605B-2_AH
ISC2-1_AH
```

```
GTCAGCTTCTCGGCCATTGAATAACCGGGCATGCAAAGAAGTGTGCAAAGTTATTACATAGTCCCCGAAA
GGGCGAGCTGACTAGACTCAGCGCAAGGGAATCCATTTTTGTTGGATACTGAGTGCTACGTCCAGATAT
CAATACCCGACCCGGTGGTACCCTAGCCGGGAACAGGGTTCAGGCAACGGATGTCTTTCAGGAGAAGAAA
ACACTGACCTGGAGCAAGAAGTATCTGGAACATTGTGCAAGGGTGATCACTCCCATCCGGGAGAGCAGGA
CTTTTGTGTACCTGCTATTACAATAACAAGGAGGACCAGCCATGAGCGTATTTCGTGGTAGGGCTGAACGGA
TGCCGGCTGATGCTTACATCTGAGAGAAAAGCCCCGTTTATTGCTAAAACATGGGAAAGCTTCTGTTTATC
GGAAGTCCCATTTACCATAAAAAGTGAATTATAAGACAGGCAGTACGACACAATCTGGCTATCTAGGGAT
CGATACTGGATCACAGCATATCGGAGTATCCGTTGTCCGTGAAGATGGAACAGTCTTACATAAAGAAGAG
ATCGGTCTGAGAGATTCCATGAGTAAAAGAAAAGTATGATGCAGTCAAGGGCTTCCCTCAAGAAGAGGAAGAC
GTCATCGAAAGACCAGATACCGTCAATCCCAAATGGAGACCAAAGCCAAACGTGTCTATTGTGAGATTCC
AGACCGAAAGGGAAGGCACTGGAAGAAAAAGAGATCACGTTTCGCATCCAAACGGGCGAAAGGGTGGCTT
CCGCCATCGCTGCAGTCAAAGACAGATCATCATATCTGGTGGATCAAAAAGCTGCAGGATCTTCTTCCAG
AGGGATACCGTCTTTCGATCGAGCTTGGCCGTTTCGATCCGGCAAGATTGAAAGATCCGGAGATCCATGG
AGAACTGTACCAGAAAGGACCACAGTATGACTATGAAAATGTCCGAGCTTATGTTCTCAATCGTGACAGA
TATACTTGTGAGGATATGTGGGAAGAAAGGCGGAAAAGTGCATGTACCCATATCCTGTACCCGGAGTCATG
GAGCGACCGATGATCCACAATATATGGCTACGGTGTGCAGCGATTGCCATAACACGGAGAACCATCAACA
GGGAGGCATTCTCTATCAGTGGATGCAGAAGCAGAAGAAATTCACCAGAGGACTGAGAGATGCCACCTTC
ATGAACATCTTACGGAAACGTCTGATAGAAGCATTCCCAGGAGCAACGTTTACCTATGGAAATATCACAA
AGGCAGACCGTGAGAGATTAAGACTTCCAAAAGTCAATGGAAATGATGCGACTGCGATCGCTATCGTAAA
GACTGGGATCATGACAGTAAAAGATAAAGAACCCGTGATCTATATCCAGCAGGTCCGAAGAAAGAAACGT
TCTTTACATGAGGAAACTCCGAGAAAAGGACGTAAGGAACCAAACCGTAAAGCTTACGATATGATAAGA
ACACGAAAGCAGTCACTGTTACGAAAAGGAAGAATAAGAAGAAGATAACGATCACTGGCTGTCTGTTTCA
TCGTGTAGAGTTGAATGGAAAGAAGGGATGGATCTCTGGCTTTACTGATAAGTCTTGTATGTAAAAGAT
GAGAATGACCAATATATCCGGACATCTCCAAAATACAAACAGGTCAGTCTGTCAAACTCAAGATTTTGC
ATCATTTGTGGAACTGGGCGATAGGAGCAAGGCAATCCCTTGGAAAGGGATGATGGCTCAAAAGAGCCTC
CTGCTTTCATCTCGGTCATTGAATGGCAGAGAATTCCCGCAGAATATCTTAA
```

```
; Anaerostipes hadrus strain PEL 85
; Terminal imperfect palindromes (identical at both ends):
```

```
;
; head 9 29
; Q: CTCGGTCATTGAATGGCCGAG
; ||||:|||| ||||:|||||
; S: CTCGGCCATTCAATGACCGAG
;
```

```
; tail 2022 2042
; Q: CTCGGTCATTGAATGGCCGAG
; ||||:|||| ||||:|||||
; S: CTCGGCCATTCAATGACCGAG
;
```

```
IS605B-1_AH
GTGAACTACTCGGTCATTGAATGGCCGAGCATCCGGAGATACTCTTTACAAACAATTTCCGAACTTAGAG
AAATGAGACCAGACTGCATGTATCGTACCATCTAGAAACATCTCTTTTCAGACAGTCCGGATACGGTCA
GCCGTACCAAGACAGTGGTAGTTCCATGTTCCATATGACTGGGCAGGCTCATGTTTCAGGTTACACACC
TGATCTTGGGACCGCTTTTTTATATGGATGCTGCTTTTTTATAAGCACTGCATCTGTCCGCGTAGATCTGA
CGCAATGCTTCCCTGTAGTTTTTTTATGCTGATACTCATATTTTTTACTGACCGCAAGGATCTCTTTATCAT
TCGCACGTTTCCCTTGATATTTACGGAAGCATTATGATCTGCATCATCCTCATGTCCACAGCAGGTACATTT
GAACGCCCTTATCTTTACGATTATCTGCATCCAGATTTCCACATAACCGGACATAACCTGACTGGTGAAGTCC
GGAACAACCTTCCATAAAGTCATAGCCTTTCCAGTTTAAATGTGATCATCAGCTTCTGTTGAAGTTTTCCCTC
TCGCAAACATGGAAAGCTTTCCATTGGCTTTCTTACTTTTTGTTGAATTCACGGATATCCAGTTTTTCCAG
AACCGTCATCGTATTTTCCAGATCGTTAAGATAAGAAGTACAGCTTTTTTGTATCTCCTGATCGAGC
ATCTGATAATAATGCCGTTTCTTTCGATATGGGACTTCCATAGTCTGCATCATATGTTCCAGCTGATCCA
CCTTCTGGATGAGAGAAGCTCTCACATCCTCGAAAGATCATGACTGTGCAGGTAATGGCAGATCTTACG
CTTTTTATTTCTCAGATCAGATAGTTCTGCAAAGGCAGTCTCCACTTCCCTCATGATAGAAATCGATCACC
CGCTTCATAGATCCAACATGTCGTCCGTGAGAAGCATAGAGAGCATCCGTGATCCCGGTATCAACACCGA
```

TATAAGTATCTACGGCAGGCTTTTCACGTTTTACGGTATAAGACCATCCGATCCGGAGAACAGGACCACG  
CATCTGTAACATGACAGTCCC GCCAGTCGATTTCGCTTCGATCTTATGCAGAGAATGTCTGCTCGTATCG  
ATCGGGACTGCGATCCTCTTTCCGCCAGTAGGATCAGAGATCGTGATCACATAGGGCATGACGGTATCTG  
TTGACTTTTTCCAGTCTCATGAGTCTGGAATCCAGAGGGATTGATACATTACGTAGTTCCGGAACTTTATA  
CTCGATAGATCTGGCAGCATAAGCATCCAGAAATCGCACACGGATGTCATAAAACTCTGCATCTGTCATC  
GCAGATAATTTCTTCGCACATTCTTATGGAATTTTTGTCCGATCTTGTTTCATCGTCTGGATCATATCAG  
TGCGGGATCTGCCCATGATATACATAGCGAACAAATACCTTTGACTTTGCAAAGATCCCGAATCCGTCAGC  
GATCATATCCAGACGGATGTTATCTAACC GGTTGGATAAGTGAGTAAGTGAACATCGAACGCATTCTGA  
CAAAAAGCAGAGTTGATCCCTTTCCGGACGGTTCGCTTTTTCCAGTCTTCGTATCTGCGAATCTTTCTTGT  
CATTCTTTACGATCTGAAAGAATATAGAAGTTTCTTGATCCAGAAGCCGTATGTTATGATTACAGAGCTT  
GATGAACAGTCTCTGCATTTCTTTTAGAGCAGAGCGTTTTCTGTACATTCGGTGTTCATACAAGAAAACA  
CTTTTGTAACGGATGTCTGAAATTCAGTCTTTTTCTGCGTCTTGCCTTTGGCATATAGAAGTTTCTCC  
TTTCTGTAGGTTTTCTTTCACTATAAATATGAGATATTTTAGAAAAATAAAAAATCATATATAAGAAAAT  
GATTCTAGATAATTAGGACTCTAGCCTCTCGGTTATCCATATGAGAATTGTTTCGTAAAAACAGAGAAAA  
GCAATGTTTATGCAGTTTATATCATATACACACAGTCATGCTTTTTATCGGTTCGCTTTTCATCTCGGTCA  
TGAATGGCCGAGGATTCCCGCTCTGCTTTCTAA

; Anaerostipes hadrus strain PEL 85

; Terminal imperfect palindromes:

; head 9 29

; Q: CTCGGCAATTGAATTACCGCG

; | |||:|||| ||||:|||| |

; S: CGCGTAATTC AATTGCCGAG

;

; tail 1881 1901

; Q: CTCGTCAATTGAATTACCGAG

; ||||:|||| ||||:||||

; S: CTCGGTAATTC AATTGACGAG

;

IS605B-2\_AH

GTGAACTACTCGGCAATTGAATTACCGCGCATCTGAAGAAGAACCTCAAACACTCATGTAAAACCATTC  
GATTCTTTTTGAAAAGAACCATCTTATGTGCGAGCGCATAAGACAGAGAGCTTCCATCGGAACAGTCCG  
GATACGGTCATGCCATAACCAGGACAGCGGTAGTTCCTATGACCCGTAGTTCGGCATCTACACAGCTTTC  
GCTGCGATTTACGATACCATCCCTTGCGGGTGCTGCTTTTTAAATCGTTTGTTCTGTTCCATATAATAAC  
CCTTAAGGGCATTTTGAAGACCTTTCCCGTATCTGTGCTTTTACAGATATCCATCAGATCTTTGTTTAC  
TGCACGTTCCCGGATATTAATGCTTCTACATGGTCTGCATCATCTTCATAACCAGCAAGTACACCTG  
AACTTCTTTCCGCTCGGTTTGCTCTGTCCAGTTACCGCATACTGGGCAGACCTGGCTGGTAAACTCAG  
GAGCTACCTCAATGAAGTCATATCCTTTCCAGTTCAGTGCCCTCATCAGTGCTTCTGTGTCTTGCCACG  
GGCAAAGCAGGAAAACATCCCGTTTACTTTACGGCTCTTCTTGAATTCTTTTATATCAAGACGCTCGATA  
ACAGTAAGGGTGTCTCTTTTGGAGTCCATCCATATATCCAGTAACAGATTTACGGATTTCTGATCCAGCA  
GCCCGTAGTAGCGACGTTTCTTCCGGTATGGAGCATTCATCGTCTGCATCATCTCATCCAACCGGTCCAT  
CTTCTGGATGAGAGAACGTCTCACATCCTCTGGAAGGGCCTTATGATGACGCAGATAATGGCTGATAGAT  
CGTTTCTTGTTACGTAGATCGGAAAGACCGGCAAATGACGGTCTACAGTGCTATGATAAAAAATCAAGCA  
CAGGTTTCATAGAGCCGATCGCATTCCTCGGAAGTGTGGAACACGTCCGTGATGCCGGTATCCACGCC  
TCTGATTACCGATGCTTTGGCTGTTTACGGAACGAGTGTAAGCCCATCCAACACGAAGATTCCCATTC  
TTTACACACACGAAAACAGATCCTGCCATTTTATTTGCTTTTGTATGATGATGAGAGAATGTCTGCTGGTGT  
TCAAAGGAACGATGAAACGTTTATTCCTGTTGAATGGGTCTGTAACAGAAATGACGTACGGAGCTTTTAT  
ATCCGCTGACTCTTCTATTCTCATCAGACGGCTGTCCAGAGGGACCTCGGTGCGTGAAATATGAGGAATC  
CTGTATTCTGCCGATGAACAGCGTAGGAATCCACTAATTCTTGCATAAGGAAAACGGAATTCATCTTCAT  
CCAGACTGTCCAGTGTGTCTGCACAGTCTTTATAGAACTGATATTCCTACCGTTCTTCTGTTTGCAAG  
ATCTTTCATGACCGCAGACATTTCTTTTTTCGACTGTCTCATCAAAGACATGGCGAAAAGAACCTTAGAC  
TGTGTAAATATGGTCTGATCCTCTGCATACATATCCTTACGGATTGTATTAATCCGGTTGGAAAGACGGG  
TAAATGCATAATCGAATGCCGCTGACAGAACGCAGAAATTTAAACCCGCAGGACGGAAGTGTTTTCCAG  
CTTCCGTACGACACTGTCTTTCTTGTCTTTTTTACAAGCTGCAGGAACAGACCATCCGTCTCACAGATG  
GTTCTGATATTCTCGTTTGCAAGTTCACAGAATCTCTGCTGCATACGGGATAAAAGATGAAGTTTTGCTT  
TATTCGGTTCGCCGTAAGAAACACGGACTTTACCGGTGATGTTTCAAACGTGCAATCTTTTCGTCTGTA  
TGCTCTTGCCATCGTCTGCTCCTTTCTTTAGTATTTTAAATTAACAAAAACGCTTTCATCTCGTCAATT  
GAATTACCGAGGATTCCCGCTTATTATCCTAA

; Halobacteroides halobius DSM 5150

; Belongs to a small group distant from others

```
; Two 98% identical copies
; Target site is not clear
; Terminal imperfect palindromes:
; head 5 71
; AGCTATGAAACAG-CTTATAAAAATCCTAACTAATGCTATTTAAAGTTAGGTAAAACCTGTTTCGTTGCT
; ||| |:|||||:-:|:|: ||::||| ||:::| | |:::| | |:::| | |:-||:|||||:| |||
; AGCAACGAAACAGTTTTACCTAACTTTAAATAGCATTAGTTAGGATTTTAT-AAGCTGTTTCATAGCT
; tail 1745 1790
; CTGTTTAT--AAACCTAT----AAGTAGTTTTAAATAGGTTTTTATAAGCAG
; |||:||||--|||||----|| || |---| |||---| ||| |||: |||
; CTGCTTATAAAAACCTATTTAAAACCTACTT----ATAGG--TTTATAAACAG
;
```

ISC2-1\_HH

```
AAGGAGCTATGAAACAGCTTATAAAAATCCTAACTAATGCTATTTAAAGTTAGGTAAAACCTGTTTCGTTGCT
TTTCAAGGTTAAGGGAGTGTAGAGGATAGAAATATCCTTAGCACAATGCTCTATGTTATTTGGTCAAAGA
GTCTTTTAACTCTACAAGGCTTATTATCACACCCCTCGGATGTATCCTATCAGTCTTAGGTTCGAGGCAGA
GCCTTGCTCTGTAACTGCTCTGTGGTGTCAAGGAAGAACGCTTACCTAAGTTCTTATAGAATACCTAAC
ACCAAAGACACTTTAAGCCCCATTTGACATTGCCTATAGCAGGGTATTTACATACCCTAGCTATTGACTA
CATCTGGGAECTATAACCAATGGTTATGTTGCGCAATGTACTTTAAGAGCAAGAATCTATATGATTCTGC
GACAAAGAAGGGAAGTTCCCATTTATGGAGGTGGCAGAGATGCCAAACAATATGCTTTTGTATTAGATAG
TAAGGGCAAGCTACTTGATCCTACTAAAAGTAAAAAAGCATGGTATTTAATTAGAAAGGGTAAAGCTAGT
TTAGTAGAAGAATATCCACTTATTATTAAGCTAAAAAGAGAAGTACCTAAAGACCAAGTTAATAGTGATA
AGCTAATTTTAGGAATTGATGATGGTACTAAAAAGGTAGGGTTTGCTTTAGTACAGAAGTGTCAAACCTAA
AAATAAAGTTCTATTTAAAGCAGTAATGGAGCAACGTC AAGATGTATCTAAAAAGATGGAAGAACGTAGA
GGTTATCGTAGGTATAGACGTTCTCATAAGAGATATAGACCTGCTAGATTTGATAATCGTTCCTCTAGCA
AGAGAAAAGGTGCAATACCACCTAGCATACTCCAAAAGAAACAAGCTATTTTAAGAGTAGTAAATAAATT
AAAGAAGTACATTAGAATAGATAAGATAGTTTTAGAAGATGTATCAATTGATATTCGTAAATTAACAGAA
GGTAGAGAACTTTATAAATTGGGAGTATCAAGAGTCTAATCGACTTGATGAAAATTTAAGAAAAGCTACGC
TATATCGTGATGATTGTACTTGTCAATTATGCGGTACTACTGAAACTATGCTACACGCCACCACATCAT
GCCTAGACGAGATGGTGGAGCAGATAGTATATATAATCTAATTACCTTATGTAAAGCTTGTCAATAAGAT
AAAGTAGATAATAATGAGTATCAGTATAAAGACCAATTTTAGCTATTATTGACAGTAAAGAACTATCTG
ACTTAAATCAGCAAGTCATGTTATGCAAGGTAAGACTTGGTTAAGAGATAAATTATCTAAAATAGCTCA
ACTAGAAATTACATCAGGTGGTAATACTGCTAATAAACGGATTGACTATGAGATAGAAAAAGTCATAGT
AATGATGCTATTTGTACTACTGGACTATTACCTGTTGATAAATATTGATGATATTAAAGAGTATTATATTA
AACCTCTTAGAAAGAAGTCTAAGGCTAAAATTAAGAATTAATAATGTTTTAGACAGCGAGATTTAGTTAA
ATATACTAAGAGAAATGGTGAAACTTATACAGGCTATATTACTTCATTAAGAATTAAGAATAATAAATAT
AATTCTAAAGTCTGTAATTTCTCAACTTTAAAAGGTAAGATTTTTTCGAGGTTATGGATTTAGAAATTTAA
CTCTATTAAATAGACCTAAAGGTCTAATGATTGTTTAATAAGTATTTTTAAAAGGGGTGTATCTGTTT
ATAAACCTATAAGTAGTTTTTAAATAGTTTTTTATAAGCAGG
```

```
; Archaea, Methanosarcina lacustris Z-7289
; consensus was derived from 10 copies that are ~97% identical to it
; GT|GA target site
```

; It shares common termini with IS605B-1\_ML:

```
; IS605B-1_ML 2 AACTACCCTCCCTAAAACCTTTCGCTTAATAGCTCAAGTTTTTGAGGACGGAGCTT 57
; |:|||||:|||||:|||||:|||||:|||||:|||||:|||||:|||||:|||||:|||||
; ISC2-2_ML 2 AATTACCCTCCCTAAAACCTTACCTAACGGCTCAGGTTTTTGAGGAAGGAGCTT 57
;
; IS605B-1_ML 1275 TGACGCTCTCATCTCCCACCTGTCCAATCCGGTAGAACCGGATTGTCCGAGGAAGGAGTCTTCCCCT 1342
; |||||:| ||:|||||:| |||||:|:| | | | | - |||||:| | - |||:| | |
; ISC2-2_ML 1608 TGACGCATTCTCCCCACCTGCCATTTCCGGCAAGCCGGAATGT-CGAGGAAGGGGTC-TCCTGCT 1673
;
```

; Terminal palindromes:

```
; head 8 52
; CCTCCCTAAAACCTTACCTAACGGCTCAGGTTTTTGAGGAAGG
; ||:||||:|||| | :| | | : :| | | :| |||:||||:| |
; CCTTCCTCAAAAACCTGAGCCGTTAGGTGAAGTTTTAGGGAGGG
;
; tail 1620 1664
; CCCCACCT-GCCATTTCCGGCAAGCCGGAATGTCGAGGAAGGGG
; ||||: |||-| ||||| ||||| ||||| |||-|| | :|||
; CCCCTTCCTCGACATTTCCGGCTTGCCGGAATGGC-AGGTGGGGG
```



```

;
ISC2-2_ML
CAATTACCCCTCCCTAAAACCTTCACCTAACGGCTCAGGTTTTTGGAGGAAGGAGCTTGTCTAACAAGCCC
TGGTTGACCAGATCACCGATTAGGAGCAATGGAAAATCGGTAACGATAGGAAAGAAATAGTTACCCCTTG
AATGCCGCCTCAGTTTAAGGCTCTAAGGATGCCGTTAAACAGTCCTGAGAGGTAGGGACAGTGTCTGCA
TCGTTAAACCTTTCCATATCAGATCGAGAGGAAGACGGATTCCGGAATTGACTGGTTCCATCTACGCTGT
AACACTCCAACCTTCACGAAGTTGGAGTCCCTCCATCTACGCTGTAACACTCCAACCTTCACGAAGTTGGAG
TCCACAATTCGGATACGCATAACTCTTCGGAGGAAAACCTATATGTTAGTTTTTCGTAATCAATCAAAAACAA
AAAACCCTAATGCCCTGTAAACCTTCAAAGCCAGAAAGCTACTGCAAGCAGGCAAGGCAAAAAGTGGTC
CGAAAATACTCCATTACAATCAAGTTACTTTTTCGGAAGCAGTGGCTATACTCAACCTGTAATTGCAGGAA
TGGATACCGGCTCTAAGGTAGTGGGCTGTGCAGCCATTGCTAACGGAAAAGTGTGTATCAGTCCGAAAT
CTACCTTAGAGAAAACGTTTTGAAAAAGATGGAACAACGGAAAGATGTACCGGAGAACCAGAAGAGGTAGA
AAAACAAGGTATAGACCTGCAAGATTTGATAACCGGGGAAATTCAGGAGAGAAGGGAGATTAGCTCCCTT
CCATCAAAAAGCAAACCTTGAATCTCATTTCCGGGAAAAAAGGTTTGTGGAATCCCTGCTTCCCTGTAACCGG
GTGGAAGGTAGAGCTTGCTTCCCTTGATATTCACAAATAACAAATCCGGAGGTTTCCGGGGTTGGGTAT
CAGGAAGGGGACCTTAAAGTTTTCTACAATGTCAAAGCTTACGTTCTGGACAGGGACGGGTACACCTGCC
AGCACTGCATGGGAAAGTCAAAGGATTTCCCGGCTACATTGCCATCATATTGTTTTCAGGTACAGAAGGG
ATCAGATGCTCCGAAAACCTGATAACGCTTTGTGAAACCTGTCAAAAGCCCTGCACAATGGAGAATTC
AAGCTTTCAGGGAACAAGTCAAAAACAAACATGCAACTGAAATCGGGATCCCTCAAATCCCAAATCCGGA
AATCCGGCTGGAGTTTTGCAGAGACTTTCGGGTACGAAACAAAGTACAGGAGAGAGCAGGTCTTGAAGTT
GTTAAAAACACATTACTTTGATGCTGTTGCTATCTGTTGCAGGGACGATCAGAAAAGTAGAGGTAGAAGAT
TCGGTTTTTCTAAAAAGAAACGTTTCCCTGCGGGAGATTATCAGCAGCGGAGAGGGAAGAGATCAGAGAAGA
AAATACCTACCGGAAAGCTGTTTTGGGCTCAGGAAATTTGATCTTGTA AAAACGGAAAACGGGATCGGGTT
CATTCGTGGCAAACGGTCATCCGGGTATTTTTCAATCTCAGATATATTCGGAAAACAAAATTTT CAGATAGT
GTTAATGTTAAGAAAAAATGCAGGAGACTGAGTGCAGGAGTACAACATTAGTTCAGATGGTACAGATGA
CGCATTCCTCCCCACCTGCCATTTCCGGCAAGCCGGAATGTGCGAGGAAGGGGTCTCCTGCTGAGGTAA
GAT

```

```

; Archaea, Methanosarcina lacustris Z-7289
; derived from 14 copies ~98% identical to it
; GT|AAA target site

```

```

; It shares common terminal parts with ISC2-2_ML:

```

```

; IS605B-1_ML 2 AACTACCCCTCCCTAAAACCTTCGCTTAATAGCTCAAGTTTTTGGAGGACGGAGCTT 57
;          ||:|||||||:|||||||:||||:|||||:|||||:|||||:|||||
; ISC2-2_ML 2 AATTACCCCTCCCTAAAACCTTCACCTAACGGCTCAGGTTTTTGGAGGAAGGAGCTT 57
;
; IS605B-1_ML 1275 TGACGCTCTCATCTCCACCTGTCCAATCCGGTGTAGAACCGGATTGTCCGAGGAAGGAGTCTTCCCGCT 1342
;          ||||| : || :|||||||:| | |||||:|:| | :| | | -| | | | | :|||-||| :|||
; ISC2-2_ML 1608 TGACGCATTCCTCCCCACCTGCCATTTCCGGCAAGCCGGAATGT-CGAGGAAGGGGTC-TCCTGCT 1673

```

```

; Terminal palindromes:

```

```

; head 12 43
; CCCTAAAACCTTCGCTTAATAGCTCAAGTTTTTGAG
; |:| ||| ||| ||| ||| ||| ||| |:|
; CTCAAAACCTTGAGCTATTAAGCGAAAGTTTAGGG
;

```

```

; tail 1287 1332
; CTCCACCT-GTCCAATCCGGTGTAGAACCGGATTGTCCGAGGAAGGAG
; |||: |||-| ||| ||| ||| | ||| :|||
; CTCCTTCCTCGGACAATCCGGTTCTACCGGATTGGAC-AGGTGGGAG
;

```

```

IS605B-1_ML

```

```

GAACTACCCCTCCCTAAAACCTTCGCTTAATAGCTCAAGTTTTTGGAGGACGGAGCTTCCTGCTTCATACT
TGGCGTTGCCGTTTTTCCAAGTCCACAGGCTCAAACGTAGTCCCTACAGCAATTTTCTTAATATTGA
TAGCGGCGTAAATGTCTCTATCATGCGTATTTTTGCAATCAGGACATTGCCACTCTCTAATATCTAACT
TAATCTTTAAGTTTGTAACACAAACGTTACAGTTTTTAGAGGAAGGTTCAAACATGCCTATTTTCAGT
ATAGTTTTTCCTACCCATTCAGCTTTGTACGTTAATTTTCAGTACGAAAGAATACCATGCTGAATCACTGA
TAACCTGAGCTAATTTGTGGTTTTTCTTTAATCTTTAATATTGAGAGTTTCAACGGCTATTGCTTGGTT
TTCGCTGATTAACCGATTGAAAACCTTTATGCTGGAAATCATGCCTTTGATTACTTATTTTTTCGTGGATT
TTCGTAAGTTTATAGACTGCCTTTCTCCGGTTTTTTGAACCTTTAACTTTCTTAGAACTCTTATTTGCA
AACATTTCAATCTTTCAAGAGAGTTTTTCAGGAATTTTGGGTTATCAATTTTTTCTCCGGTAGAAAGAGT
AGCGAAAGTCGTAACCTCCTACATCTATTCCAATCAAGGTAGCATGAGAAAATCTTGTTTTTTCGGGAAGT
TTTTCTCCATCATTTGTTAGAAAACCTTATGTAGTATTTTCCTGTTGGTGTCTGGATATAGTTATAGTTT
TCAAACCTTCCTTTGCTAATTTCCCTATGCATCTTAACCTTAAATCCAACCAAACCTTAGGCAACAAAACCTT
GGAAAATAGATGTATCAAGACTATAGTGTGAGGAATCTGAAAGGAAAAAATGGTGATCCTTTTTCTTTTTT
TTTTGAGGATACCCAAATCCAAAATTAAGAAGTTTGTAAAAGCTTTATTCAGATTTCTACTTGCTTGT

```

GCAATGCTCCTGCATTAACCTTCTTTCAACCAGGGATACACTTCTTTCAAACCTAAGAGGTGATTATTAAG  
GTCAAACCTCCGAGAGACTTATTCTGAATTTTTTATACATTAACGATTTGATTTCAAGGAGTTTATTATAG  
ACAAAACGACAGCTACCGAAGTGTTTTTCCATAAGGGCTTTTTGCTCCTTATTAGGGTAAATTCGGTATC  
TGTTACCTCGAAGCATCTTTATAATATACTCTTTGTAAGTATATGAAGATCTACGAAATTATTATCTTCG  
GATTGTGGGGAAGTTGACGCTCTCATCTCCACCTGTCCAATCCGGTAGAACCGGATTGTCCGAGGAAGG  
AGTCTTCCCGCTTCGGGAGAT

; CP003548

; Nostoc sp. PCC 7107, complete genome

; 4 copies (3 are 100% identical)

; N|TTCA

IS605-1\_NS

ATGAACTACCCACAATTGGCTTCGCCTGAACTGTGGGTTTCTACATCCCCAGTTCGTTTTTTAGCGAGTT  
TTTTCTGTAGATTTTTGTGCTTCTTCGCCCTAGTTGCCTCATCGATCCAGATTGCTTACGCTTACCAGT  
AGATGTGGGAGAGCTAGGCGACTCTGCGACTACGAGGCTAGTTCCTAACCCCGGTAGAGTACCTTTAGAC  
CAATAAAGCATTACTTCGGCAGCAGCAATATCCCTATCCTGCACGTATCCGCAAACAACACAATTATGAA  
CTCGAATATCAAGAGTTTTTTTTATGTTGATGACCACACTTCGGACAGGTTTGACTAGGCTTTACTTTCTT  
CGTTGGAACCTTACAAATACACCACCAATTTGCTCAACTTTGTACTTGATGGTATTGCGAAGCATTCCA  
AAAGCAACATCTAGTATTGACTTATTCAGTCCTGCTTTTTGCTTTTTACGCTTGCCTTTCTTTGCTTTAC  
TAGTCATGTTTTTACTTCTAGTTTTTTCAGTCGCAACGAAGCTATTACCGCTTACAATTTCTGCTGCTAC  
TTGATGTACCCAGTTTTGTCTTTGATTACCAACTTTACGAACTAGCTTAGTAACCTTTGATTGGGCTTTT  
TTATATCGTCTAGAAGCTTTAATTTTTTTGTTTCTATTTGGTGCAGCTTTACGCCTTCTCTCCTTAGAAG  
CTTTTTTTGATTTTCTGTTTCTCAGCATTCTCAAAAACCTTAGGAGCATCGATTTGTTGATGATTCTCTCCATC  
CGTAATTGATAATGCTGCTTTACAACCTAAGTCAATACCAATTGCACCAACTGGTAGAACTTTAGGCTTT  
AATGCTTGGTCTAGCACATCAACAGTAATAGATGCGTACCATTTACTATTGCGATAAACGATAGTGCAAG  
TAGTTGATTTACCCCAACCCAAAGCCTGCCCCGCATCTGAATACGTCCAATTTTAGACAGATTGAGATA  
TCCGTTTTTCGCCTTCAGATTCTACTTTAAAACCTGCACAGTCTGGATAAGTCCATCCTGAATAATGTCTA  
ATTGACTTAAATCTCGGACGCTTACCTAGCCCTTTAAACCAACGCTCAAATGCAAATCAACACGTTTTTA  
ATGTTGCTTGCAGTGCATGGCTGGGAAGTCTTTGTACTCTACCCAAACATCTTTAAATGCTGGCAAACA  
ATTCTGTTGCTCAAAAATAATCAACTTTGTGATTATAGATTTTGTACTGGTTAAATCTGTTATTTACTGCG  
GCATTGTACAAGTCTTGTGGAGCTTTCCGGTATACCGCAAATAATTCAGTTTTCTCGTTTTGGGTATA  
ACCGAAAAGTCATTGCTTGTGTTGCCACAGGCTGTTTTTGTTCCTCCAAAATCTGGTATATTAATCAG  
AATACAACGGACACGGCTACTTGTCAAATGCTTCTCGTAAAGGGTCACACGCTGTTTTTTCTATTCACT  
TACATTTGTTTTTTATTACTAAGTATCGTAAAAAAGTAATTACCGCACCAATCCTTGAGAGGATGCACGA  
GATTTTTGCAAATATTTGCATTAATAAATAATTGCATTTTGGTTGAATTCTCAGGTGAAGAAGACCATGTA  
CATTTACTGGTGGACTATCACCCAGACAACAATATTTCTGACTTTACCTCTAGTTTAAAATCTGCTAGTA  
GTAGGGTCATTGTAAGAATTTAAGGAGCATATTGAAAAGTTTTACTGGAAACCTTTGTTTTGGTCTAG  
CTCGTATTATGTAGCGTCAAGTGGCGGCGCACCGATTGATCAACTTAGGCAATATATTAAGAGCAAGAT  
GCACCGACCGAATAAATATGGATTGGTTATTTCCACTTCGTTCCAATAACCCGCTCCGATCCCTACCCTA  
CTAAGAGTTGAGGGTAGGGACTGCCGCGATACGTTCA

; Coleofasciculus chthonoplastes PCC 7420

; FRAGMENT 27308 -> 22901

; gi|193882179|gb|ABRS01000127.1|

; contains insertion of mobile group 2 intron (RT-maturade-HMH)

IS605-1\_CC

ATGAACTACCCAGCCCTACTTCGTTGAGGTCTGGGTTTCTACAACCAGACCAGTATGACTATGTTTCTGA  
CGCTTCACTTGTCTAGTTGCTTTCATGCTTCTCTGTTGCTTACGCTTACAGGTTTCTGAAGTAGAGCTAG  
AGACATCAGCGTCTGCGAGGCTCGTTCCAAACCCCGGTAGAATTCCTAATGCCACAAAAGCATTACTAG  
AGCAGCGGCTAAATCCCTATCCATTTTCGAGTCCACATTCATGGCAATGGTGAACCTTTTCATCTAAGGTC  
TTTTTGGCTTGGTTTCCGCATTTAGGGCAGGTCTGAGATGGTTTCACTTTTGCAGTAGGAACCTCTACAA  
AAACCCACCAGCGTTTTTTACTTTGTACTCAATCGCTGACCTTAGCATCCCCATACCTACGTCTAAGAT  
GGATTTATTTAGCCAGCCTTTTGTCTTTTTGCGTTTGCCTTTTTTGGAAAGAGCGGGTCATTTTAGAGACT  
TCTAGTTTTTCCGTAGCAACGAAGCTATTACAGCTAACAATGTCTGTTGCTACTTGGTGTACCCAATTCT  
GACGCTGATTAGCTACCTTACGGGTACTTTGCTAATCTTGGCTTGGGTCTTTTTCCACCGATTAGAAGC  
TTTCTGTTTTTTTTCTTCTGTTAGGAGTCTTTTCCGACGTTTTTCCCTTAGAAAAGACGCTTAATTTGGCT  
TCAGCTTTTTCGAAAAAATTTAGGAGCTTCAATGAAAGAATGATTTTCTCCATCAGTTATTGCTAACGCTG  
ACTTGCACCCAAAATCGATACCAACTGAACCAAAAATCTGTTTGTCTCGTTGCCGCTGTAATTCAGTTAT  
ATTAACGGTTATACTGGCATAACCATTTTCTATTGCGATAAACAATAGTGCAGGTCGTTGGAGTCCCCAG  
ATACGGGCTTTGCCGCGCATCTGGATTGAGCCAATCTTAGCTAACTCTAGATAACCGTTATCACCCGTTG  
TATGTACCTTCCAGCCTGTTTTACTTGGATAAGTCCATCCAGAATAATGTTTAAATGACTTATATTTGGG

TCGCTTTGCTAAACCCCTTAAACCAACGATTAATGCGTAATCGACACGCTTTAAAGTGGCTTGTAGAGTC  
 ATGGAATTGCATTCTTTGTACTCTGTCCAAACTTCTTTAAAAGCCGGTAAAGAGTTATTAAGCTCAACGA  
 GACTGTCACCAGTCCCCCTGGTCTTCAAACCCGTGCGTGAAAGTTTCCCTCTCACACGGCTCCTCAACGAT  
 AAGGTGCAAGTCATGCATACCTCATTACCCATTTGTCTCGACTCTTTCGAGCCTTTTGGTGAGCTTAGG  
 CTTGGCACTGTTACAGCCAGATTGATTGCCGAGACTGCCATCTGTGACGGTCTTTGTGTGCATGGCAATGT  
 CTATGTAGAAGCTGCCAATTATCGTAGAAATCCTTCCACCTTGCAGCTTAGGGATTCTGTGGTCAACTT  
 CCATCACATCGTTTTTCACGGAAAATTAATCCGAGTGAGTACATTTCCCTTTTTGTCTTCAACAATGT  
 TGCCAGTGTCTTAGGCATTTACAGGGTGTACCATTCTTGAACCTCCAATAAACCAAGTTGCCGTTGTAT  
 GGGGACGATTCCGCCCTTAACTTTACATAGCGCTTAAATGGTGTTCGCTATGTTTTAGTAACCGCGTAG  
 GGTTATTACCTTTTTGCCTGGTTGCGAATACCCAGTTGTGCGCCGTCTATGGATTGCCAATACTTCTTTGA  
 CACCCATCCCCCGGATTTTTTGGGGTGTGCGGCGCTTGGCCAAAGCTCTGAGCTTCTGGTACATGAGGTAA  
 TCTTGGTACAGTAAGCCACCTTACTTACTTGTGTTGCGTAGTAGTTAGCCCATCCCCGAATAATCGGGT  
 TCAGTTTCTTAATTAGCGCCACTTGTGGTGCATTCCTGTGGGCGTTGATAACTTCCGCAATCTGTTCGTA  
 GTGTACCTTCTGCTTATCCTTGTCTGGGGTGTATGATTGGTTTTATTCCTAGCGCTCTTCCATATTTGTCT  
 TTTCCAGAGTGGTATTTACCCACTTTGTATTGACGTATATTGAAGCCAAGGAAATCAAATCCTGGCTGTT  
 CTTGTTTCATACGGGTGAGGGTGTGAGCAAGTCTTGTGTTTGTAGGTTTTAGTTCAAACCCATGTCTTT  
 CAACCATCCTGGATTATATCCTTGCCACTTTGGACGATGGTTAAGTCTTCGTGGAGAATCACGAAGTCG  
 TCGGCATATCTGATCACGGATGGAGGATAGAATGTCTTCTTACCCATTTTCAGAGTATCCCCGTTTTG  
 GGAATACCTTTTTGATTAGATTTCCATCCCGTGGAGGGCAATGTTTGCTAGTAACGGAGAAATGACCCC  
 GCCCTGTGGCGTTCCCTCAGTTGTTGGAAACAACTGCTTTGCGTCCATCACTCCCCCTTTAAACCATGCT  
 CGGATTTGACGGCGTATGGTAGGGAAATGATTTAATTTTTCTTAGCAGTGCTTTATGGTTCGATTTGGTCAA  
 AGCATTTAGCAATATCGGCATCAAGGACATATTTGCCCTTAAACCTAATTGTGTGCATATATAGCCTGAAC  
 CGCATCGTGACATGAGCGTCCGGGTCTGAAACCGTATGAGTTGGCTTCAAATCGCGCTTCCCATCTGGC  
 TCTAGTGCCAGTTTGGACAAGTGCTTGCAAAGCTCGGTCTTTCATTGTGCGGGATGCCTAAAGGTCTTTTCT  
 CCTCCTTTCCGGGTTTTGGGAATCCATACTCGCCTGGTTGGAGCGACCTTTGAACATAGTTTTAGATTTTC  
 AACCAAGATGAGACGTTGCTTTGGGGTCACTGACTTAACACCATCCACACCTGCCGTCTTCTTACCTTGA  
 TTGTCTTGGGTAAACCCGGCGAACCAGAGACATTTTGCTGCCCAGGACTTCATCAGCATCTTTGGAGTC  
 TCGGAGTCATTTTACATCGCCACGCTGAGAGGCTCGATAGATTCTTCTTGCAACTTGTAGACTTTACG  
 CTCTAGTTTTTTGCCAGGGTATTGCCCTCCATTCATCGTAGTCTTAAACTCGCTTTAGACATTTGTATT  
 GCTACTTAAGACTCTATCTTCTTATCATCGTGAGTCTGTTGGCGTATCCCTCTTATTAGTAGAGAGCG  
 TTAGCTTCTGACTCAATCTTCTCCATGCTTGCAGTTGGCACCTACTCAGGCATCGACCTGACTGAG  
 AGCATAAGGGAGGTTATCTCGTTCTGATAGCCATTTGTTGAACTTTTAGGATGGTACTATCCACCGGGT  
 TTATAGGGAGTACAAGTTGGTCAACAACAAAATTGCCAACCCCTGATTTCCCTGTGCCTTTTGGCTCCAGT  
 GTGTACGCCTTATTACACTGGTTCTTCGTAACGATGGTTTCAGTGTACCTTCGTATTCCTATCCATGAGT  
 TCTTGTCTCGATGGTTGCCGGATTAGGCTTCCAGCATTGCCACCTTTCACCCCCGCTTTAGGCTTTGATAA  
 CCAGTCTCAAACCTAGGGGACAAGGTTTTAAAACCCCTGGCTCTGTGTGCTTTTACTCCTGTACTTAGAG  
 AGTAGGACTTGAGAGTTTTGCTTCTCTCACCTACATGGCTATCAAGTTGTCAAGTTTCAGACCTTGCAGG  
 TAATCCTCTATCCATTTCAGGAATAGTTTCTACCTAACGATTTCGCACCTTGTGCTCGAAGTAGTCAACGC  
 TATGGTTGAACTTCTGGTACTGGGTAAACCGATTACAGACAGCAGCGTTGTACAGGCTTTTGTGCAACTT  
 ACGGTGATAACCGCAATGTCTGCTTTTGTCTTTTATTGGGGTATAGCCGAAAATTACACGTCTTGTGGC  
 ATCGCTGTTCCCTCCTGTTACTTAAAGGTAACAGATTCAGGTGAGGGTATGTCAAGTGAAAGCTAGAAA  
 AGGTTCCGACTCTGTATTTCTGTTCAACTGCATATAGTATTTGTAATAATAACAGGCGCAAGATTATT  
 ACAGTGGGAATGTTACAGAGATTACATGAAGTGCTTGCCTAATGTTGTATTAAGACAAAGTGTGCGTTAG  
 TAGAGTTTTCAGGAGAAGCTGACCATGTACATCTATTAGTAGACTTTCATCCTGACAACAATTTATCATC  
 TCTAATTGGTAGTATGAAGTCTGCATCTAGTCGAATCATCAGAAAAGACTTTGCTGCTCAACTGTCAAAA  
 ACTTATACTAAGTCGGCATTTTGGTFCGGGTTCTTATTATGTTGCGTCTACTGGGCGTGCGCCTATTGAGA  
 GAATTAAGGCTTACATCAAATCACAAGACGCACCCAAAATTGATTGCCTCCGTTCCCTCCGGCAATCCGC  
 TATCCCTCCTCACCTCCTGAGCCTGCGAAGGATCTGCTGAGGGTGAGGACTCTCGCGAACTCGTTGA

; Coleofasciculus chthonoplastes PCC 7420

; FRAGMENT 44903 -> 48819

; gi|193882172|gb|ABRS01000134.1|

; Genome contains 3 copies: 2 copies are 99.95% identical to each and contain  
 ; the mobile group2 intron at the same position; the third copy does not  
 ; have this insertion.

; Terminal palindromes:

; head 18 49

; TTCCCCGACTTCAGCGATAGC--AAGTCGGGGAA

; |||||----|| || ||--|||||||

; TTCCCCGACTT--GCTATCGCTGAAGTCGGGGAA

```
;
; tail 3882 3910
; ACAGCGACTTCAACAAAGT--AAGTCGCTGT
; |||||---||---|||
; ACAGCGACTT--ACTTTGTTGAAGTCGCTGT
;
```

IS605B-1\_CC

```
TGAACGTAATCGCGGCATTCCCCGACTTCAGCGATAGCAAGTCGGGGAAGGATAGCGGATAATTTACGGG
TTTCGACATCCCGTAAATTATCAAAATTACCATTGTTATTTTACCCAATTAAATGATAATATGGGGGGTAT
GCTAACACGTAGAACCACCTTTCAGACTTTATCCAAACAAGACCCAATGTGACAAGCTTCATTGGGCGAGA
AAAATGCATTGTGCTCTCTACAACGCGGCAATGGCTAACCCTAGGACACAATACAAACACTTTGGGCATT
CTGTTGATTATTTTGAACAACAGGTGCGAATCGTTAGGTAGAACTATTCTGAAATGGATAGAGGATTA
CCTGCAAGGTCTGAACCTTGACAACCTTGATAGCCATGTAGGTGAGAGAAAGCAAACCTCTCAAGTCCTACT
CTCTAAGTACAGGAGTAAAAGCACACAGAGCCAGGGTTTTTTAAACCTTGTCCCCTAGGTTTGAGACTGG
TTATCAAAGCCTAAAGCGGGGGTGAAGGTGGCAATGCTGGAAGCCTAATCCGGCAACCATCGAGCAAGA
ACTCATGGATAGGAATACGAAGGTACGACTGAACCATCGTTACGAAGAACCAGTGAATAAGGCTGACAC
ACTGGAGCCAAAAGGCACAGGAAATCAGGGGTTGGCAATTTTGTGTTGACCAACTTGTACTCCCTATAA
ACCCGGTGGATAGTACCATCCTAAAAGTTCAAACAATGGCTATCAGGAACGAGATAACCTCCCTTATGCT
CTCAGTCAGGTGCGATGCCCTGAGTAGGTGCCAACCGCAAGCAATGGGAGGAAAGATTGAGTCAGAAGCTAA
CGCTCTCTACTAATAAGAGGGATACGCCAACAGACTCACGATGATAAGGAAAGATAGAGTCTTAAGTAGC
AATACAAATGTCTAAAGCGAGTTTAAAGACTACGATGGAATGGAAGGCAATACCCTGGCAAAAACCTAGAG
CGTAAAGTCTACAAGTTGCAGAAGAGAATCTATCGAGCCTCTCAGCGTGGCGATGTGAAAATGACTCGCA
GACTCCAAAAGATGCTGATGAAGTCTGGGCAGCAAAATGTCTCTCGGTTCCGCCGGTTACCCAAGACAA
TCAAGGTAAGAAGACGGCAGGTGTGGATGGTGTAAAGTCACTGACCCCAAAGCAACGTCTCATCTTGGTT
GAAAATCTAAAACCTATGTTCAAAGTTCGCTCCAACCAGGCGAGTATGGATTCCCAAACCCGGAAAGGAGG
AGAAAAGACCTTTAGGCATCCCGACAATGAAAGACCGAGCTTTGCAAGCACTTGTCAAACCTGGCACTAGA
GCCAGAATGGGAAGCGCGATTTGAAGCCAACCTCATACGGTTTCAGACCCGGACGCTCATGTACAGATGCG
GTTTCAGGCTATATATGACACAATTAGGTTTAAAGGCAAATATGTCCTTGATGCCGATATTGCTAAATGCT
TTGACCAAATCGACCATAAAGCACTGCTAAGAAAATTAATAACATTCCTTACCATAACGCGTCAAATCCG
AGCATGGTTAAAAGGGGGAGTGATGGACGCAAAGCAGTTGTTTCCAACAACCTGAGGGAACGCCACAGGGC
GGGGTCATTTCTCCGTTACTAGCAAACATTGCCCTCCACGGGATGGAAAATCTAATCAAAGGGTATTCC
CAAAACGGGGATACTCTGAAAATGGGGTAAAGAAGACATTCTATCCTCCATCCGTGATCAGATATGCCGA
CGACTTCGTGATTCTCCACGAAGACTTAACCATCGTCCAAAGTGGCAAGGATATAATCCAGGAATGGTTG
AAAGACATGGGTTTGGAACTAAAACCTAGCAAAAACAAGACTTGCTCACACCCTCAACCCGTATGAACAAG
AACAGCCAGGATTTGATTTCTTGGCTTCAATATACGTCAATACAAAGTGGGTAAATACCACTCTGGAAA
AGACAAATATGGAAGAGCGCTAGGAATAAAAACCAATCATCACCCCAAGCAAGGATAAGCAGAAGGTACAC
TACGAACAGATTGCGGAAGTTATCAACGCCACAGGAATGCACCACAAGTGGCGCTAATTAAGAACTGA
ACCCGATTATTCGGGGATGGGCTAACTACTACGCAACACAAGTAAGTAAGGTGGCTTACTGTGACCAAGA
TTACCTCATGTACCAGAAGCTCAGAGCTTGGGCAAAGCGCCGACACCCCAAAAATCCGGGGGATGGGTG
TCAAAGAAGTATTGGCAATCCATAGACGGCGACAACCTGGGTATTCGCAACCAGGCAAAAAGGTAATAACC
CTACGCGTTACTAAAACATAGCGAAACACCAATTAAGCGCTATGTAAAGTTAAGGGCGAATCGTCCCC
ATACAACGGCAACTTGGTTTATTGGAGTTCAAGAATGGGTAACAACCCTGAAATGCCTAAGACACTGGCA
ACATTTGTTGAAGAAGCAAAAAGGGAAATGTACTCACTGCGGATTAATTTTCCGTGAAAACGATGTGATGG
AAGTTGACCACAGAATCCCTAAGTCGCAAGGTGGAAAGGATTTCTACGATAATTGGCAGCTTCTACATAG
ACATTTGCCATGACACAAAGACCGTCACAGATGGCAGTCTCGGCAATCAATCTGGCTGTAACAGTGCCAAG
CCTAAGCTCACAAAAGGCTCGAAAAGTTCGAGGACAAATGGGTAATGAGGTATGCATGACTTGCACCTT
ATCGTTGAGGAGCCGTGTGAGAGGAACTTTCACGCACGGTTTTTGAAGACCAGGGGGACTGGTGACAGTC
TCGCTGAGTTTAAATAACTGTTTACCTGAGTTTTAAAAGGTTTTGGACTGAGTATGCTGAATTAGGTTCCCA
TACGTTACAAGCTACCTTAAAGCGGGTTGATTTTACCTATAAGCGATTTTTTCAAGGGATTAGGTAAGTAT
CCTAAGTTCAAAGCGAAGCGGGCGGTATAGTGGCTGGACATATCCAGACAAAGCTAGTTGGAAGGCTTTTAT
CTAACGGACCCAATGGTTACTTAGAAGTGAAGACCTTGGTTTTAAAGATTCAAATGCGGGGTCAAGCTAG
AACTTGGGGAACCCCGACTACTTGCACAATCTTTTTCAGGAATGGTTTGTGGTATGCATCAATCACCGTG
CAGTGCAACCCAACTCGCCAGACGGGTACAGGTTCAATCGGGATCGACCTTGGCTGTAAAGACGCGGTGA
CGCTTCAACTGGCGAGAAAATTGCTAAACCCGATTTTTATTAAGGAGGGACACAAAAGGTTAAGGTAGC
CTCAAAGCGGTTAAGACGCAAGAGACCGCCGAATAGGAATAAGAAGGTCAAGGGGTCGAGGCGATGGAAA
AAAGAACGTAAACAGCTCTCTAAAGTTTCAGAGCAAAATAGCCCCGACAACGGGAAAATTTGGCTGCACAAAG
TAACCAGTGATATAGTCAGCGGTAATAGCCTAATCGGTGGTGAAGCAGTTAAACGTCAAGGGCATGACTCG
AAAAGCAAAAAGGGTAAGCGTAAGAAACAGAAAGCCGGATTAATCGGTCTATTTCTAGACGTTGGGTTT
GGTCTAGTCGGTGATTTATTAACCTACAAATCGGCTGAGGCAGGTGGGTTTTATGTTGAGTACCAACCC
```

GGATGCTCAAGCCAACCTCAACGGTGTGCTAAATGTTGGGAATTAACGCCTAAGAGTTTAGCTGATAGAGT  
TCATGTTTGTCTAATCCTGACTGCGGTTCATACCGAAGACAGAGATATCAATGCTGCCCAAGTAAATGAG  
ATTTGGGCAAGGGGCTTGGAAACGAACCTCTTTAGACGCAGAGCTGCCTAGCTCTACTGATTGTGGAAGCA  
TGAAGCAACTAGGAGCGAGGAAGCGTCAGAAACAGCGACTTCAACAAAGTAAGTCGCTGTAGTTCAT  
; Methanohalobium evestigatum Z-7303  
; Consensus was derived from 6 copies ~ 94% identical to it.  
; It codes for TnpB (pos 1277-48).  
; This transposon shares its 34-bp 5'-terminus with ISC2Y-1\_KR and ISC2Y-2\_KR.  
; The shared region contains an imperfect palindrome (pos 9-31). The  
; 3'-terminal palindrome is at position 1330-1354.

IS605B-1\_ME

GTGAACTA CCGCTGAGCTAAAGACTCAGCGGCTTCGGAAGAAGTTTACCTTGAAAGTCTTATTCTTCCCG  
GGGAGTTCACGTCCCACCTATCGGTTATCCCTGCAAGGGAATCACCGATTACCTTTCTCAAGATGTTTCAG  
TGCACCGTTGATATCGGCATTAATCAGTCTACCTGTAGATGACTGGAAGATTCCCTCTCTTAGGTCTTTTA  
CCGAGATATTTCTTATGTTTTCTGATAGGTTCTAAAGCCAGTGCATCAACCTTGCTGGTATAAGCTTCAT  
CTACTTCATGATACTTTATAACCATGGTATTCGCATTTTGAAGCTAATTTCTGTTTGAACCTGGCAAATGG  
TATTGCTGGAAGTTCGGGTATTTTCTTACCGATATTCTGTTCCCTGTTTGATCTCTTTCATCTCTCCA  
ATCACAATATTACCGATTCTATTTTCCAGACAGTGTTTAACGATATGATTAACGCACTGGTTCATGAAAT  
CATTTATCTTCCAGAACCTTTTATTAGAGAATCTATCCATCTTGATTCCATCATCTACATTCTGTTTGTG  
GTAGACTGACTGCAACCTGCTCTTCTCCTTGTTCACCAGCGGTTGTAAGATTTGATACCCCTGCCGTCT  
AATATGAATGCAGTCCCGCTGGTCGTCACGCAGGTTGCAAATTTGCTACTCCAAGATCTATCGATAGAT  
GGCTATTATAATCAAGTTCAGCAATCTCCCCGCTTTCATGATATACAAATTCTATCTCGAACCATCTACC  
CTTGTATTTCCGTACGATCCTGACCTGATTGATGATTGACCTATTATGTTGTCAGGTATCTTGAAATAC  
AGGTATCTGGTTCCATATGTTCTACCATATTCAGGACCCAATGATAGTCTGATTTTATCGTCGATAACCT  
TCAGTTGATCTTTCTTGAATGTACAGATGAAGTTCCGTCTTTATCCAGATACTTTGGAAGTGAACTGG  
TTTTTCATATTCTCCTTTTCTTTTCTTATCCAGAAGTTTGAAGAACGATTTTCATACTGCCATCTACAGTT  
TCCACAGTATTCTGGGCTACCTGAGATGGCATTAAATCTGTAATTTTCGTTCTCTTTGACCGTATGATAAG  
CGGTATTCTTATTGAGATATTTGCCATAGTTGAAGAAGTACTGTCTAATCGTGTACAATGTAAAATTGTA  
CAGGTTCTTGGACAGTTTGGTCAACCTCTTCAAAGTTTTCATACGTCTGCTTATCAGCACGGAGATGGTTC  
TTCTGGGTTAGATACATNCATTATAACAATCATTTAGCAAATACTTATCTTTTTTTGACTATTTATCAT **A**  
**CCACGATGCTAAAGACATCGTGGT**TTTCTTCATCTTTATAA

; gi|126630642|gb|AAXY01000001.1| 229256 -> 227033  
; It is inserted just upstream the ACTG target site.  
; Its 3'-terminus is simialr to that in ISC2-1\_MS:  
; IS605B-1\_MS 1372 1413  
; ISC2-1\_MS 1641 1682  
; Q: CGCGCTATCCTTCCCCGCCCTGAAGGGCGAGGTTTGCCGCGC  
; |||||:||||| |||||:|:| | |||||  
; S: CGCGCTATCCCTCCCCGACCTGAAGGACGGGTATCCCCGCGC  
;

; Terminal imperfect palindromes:  
; head 11 56  
; Q: TCCCCGCCCTCTT-GCTTCGCTCGTCGCTACGCGAAAAGGACGGGGA  
; |||||:|:| -|| | || || -|:|:|:| |||||  
; S: TCCCCGTCTTTTCGCGTAGCGACGAGCGAAGC-AAGAGGGCGGGGA  
;  
; tail 1384 1403  
; Q: CCCCGCCCTGAAGGGCGAGG  
; |:| ||||| |||||:|  
; S: CCTCGCCCTTCAGGGCGGGG  
;

IS605B-1\_MS

GTTGACATCCTCCCCGCCCTCTTGCTTCGCTCGTCGCTACGCGAAAAGGACGGGGATTTCCTACGGCGATT  
TAAGCGGCTTGCAGCGTCGTCGCTTCGGTGGGTTCCCTGCTGCTGACGGCCTAACTGCACCGTTCACTG  
CACAGGCTATCCGAGCCATATCCGCCCCCTTTGAGCAGGTTTAAATCCGCGCTCACGGATGTTCTTTGCCGC  
TACCCGTCGGCATTTTCGCAGTGGCCGAGGCCGTGCAGAGAAAACAGCGCCTGGGTTTGCCGGTTGTCA  
GCATGGATATGTCCGCAAACCGGGCACTGGCGGCTGGTGTCTGCGCCGGCACCGCGACAAGCCAACCAC  
CGGTCCACGCCGACTTGTAGTCGAGCTGACGGCGAAACTCACCCAGCCTTGATCCAAAATCGAGCGATT  
GAGTCCTGACTTTTTGCCTGATATTTGACCCGGTTGAGCGGCACTGCCTTTGGCCGAACGACTCATGTTG

CTGACCTGCAAATCTTCGACACACAGCAGCGCGTGGCTTTTGGCTGATGCTGTGCGAAGCTTTATGCAGGT  
AGTTATTACGGGTATTGGCGATCTGCCGCTGAATGCGCTGGAAACGGGTTTTGGCCCGCTTCCAGTTGCT  
GCTGAACTTGGTTTTTTGGCTCATCTGCCGCTGCGCTTTGGCCAGGCGCTGCTGGTGACGCTTGAAGCTG  
TTCAGCGGTGGCAGGACGGTTTTCTTGGGTTCCATCCCAGAGGGTGGCGAATCGGACAATCCCCAGGTCGA  
TACCGACCGCCAGCGGGGAGGCGTGCAGCGGGGTTCCACCTCGCGCTCGGTCTGGATCGAGGCAAACCA  
GCGCCAGCGCTCAGGCTGACGGTGACGTTTTTTCACCGTACCCAGCACCGCCCGACTGTTGCGATAGCGC  
AGCCAGCCAAGTTTTGGGTAGGAAGAGTCGGGCATTACCCTGATCGAGCTTGATCTGTTTTGGGGTCGGGGT  
AGCGGAAGCTGTGCGCCATGCCCTTCTTTTTGAACCGAGGGAAGTCCGCCTGCTTAGCGAAGAAGTTACT  
GTAGGCGCGGTCTAAATCTTTGAGAGCGTGCTGCAACGGATGCACGGGGGCGTCCTTGAGCCAGGGCGTT  
TCAGCACCTTGCGCCAAGCCGTCAGATGCTTGGCCATCGGCACATAGCCAATGAACTTCTCGCCTGCCT  
CACGGTTAGCCTGCTGCAACGCCAATGCCTTATTGAACACGAACCGGCACGAACCCGCGAACTGCCGCAG  
CTTGCCTGTTGTTGCGCCAGTCGGCTCAATACGGTACTTGAAGGCTTGGCGTCTGGTCATAGAAATACTG  
TATATCCATCCACATTCAAGAGCAAGGACGGCTACGCCGTCCGCGCTATCCTTCCCCGCCCTGAAGGGCG  
AGGTTTGCCGCGC

## Protein sequences encoded by the reported transposons (FASTA format).

>ISC2-1\_KR *Ktedonobacter racemifer* DSM 493

MQCSGKSTALYHCRGKHYPGNRRLNVSNVFVIDSDYKPLNPVHPGHARRLLRQGKAAVFRYPFTIVLKR  
VVEQPEVQPLHLKLDPGSKTTGIALVNDTNGKIVFAAELSHRGHAIKDSLDSRRASRQGRRQRKTRYRKP  
RFDNRRRKKGWLPPSLESRLANILTWVARLCRYAPIATLSQELVKFDMQLMENPDIAGVEYQQGTLOGYE  
VREYLLEKWEKTCAYCGKQDVPLQVEHIHPRARSNTNRMSNLTLACEACNTAKGTQEIIEVFLKKKPDVLK  
RLLAQVKKPLKDASAVNSTRCALLERLALGLPVECGSGGLTKFNRTTRGLPKTHWLDAACVKGSTPDVL  
LQKGVIPLRKATGHGRRQMCVDPKYGFPKQHKERKKTFLGYQTGDLVKAITPKGTFEGRIAIRHRPSFR  
LEKVDIHPKYMRCVQRSDGYEYTKGVRHAPPHG

>ISC2-2\_KR *Ktedonobacter racemifer* DSM 493

MSHVFEVDANKQPLNPVHPARARVLLSQGKAAVLKRFPTIILNVAIDAPVVEELRIKIDPGSKTTGIAL  
VNDQSGEVVFAAELHHRGAKIKEALDDRRAVRYSRRRHTRYRKARWQNRNRREGWLPPSLTSRISNVLT  
WVKRLRNLCPITAMSMELVKFDMQAMENPDIQGWYQQGTLAGYELREYLLEKWNRMCAAYCGKGNVPLQV  
EHIVPRANKGTHRVSNLTLACEKCNQAKGTQDIKDFLKKKPAMLKHILAQAKAPLNDAAVNATRWELEFR  
GLQALGLPIECGSGGLTKYNRTTRELKTHWIDAACVQSTPEYLNNTTGISSLLITATGYGKRQLCGVDK  
HGFPQRHRQRKKVHHGYQTGDLVRAVVEGFAAAGRHVGRVLRATGSFDLRTARGRIEGVPVRYCRPLH  
RNDGYSYHSTRGGNSSPL

>ISC2-1\_GS *Geitlerinema* sp. PCC 7105

MHVFLDKDKKPLAPCHPAKARRLLKSGRASVFRYPFTLILHEIEAKDCVVPETQLKIDPGSQTTGLAI  
LSENRVIWASELSYRGOQIKNDLEKRRALRRSRRHRKTRYRKPRFLNRTRPKGWLPPLNHRVETMTWV  
NRLRKLCPIVSIAQELVRFDTQKLQNPVSGIEYQQGELLGYEVREFLLEKWGRKCIYCGAENLPLEVEH  
IHPKSQGGSDRVSNTLACHTCNQAKGNRDIREFLSGKPTVLNRILKQAKAPLKDAAVNATRWKLYQQ  
KETGLPVEVGTGGQTKFNRTRLGLPKTHWLDAACVKGSTPDRLDVAVEKPLLVAAGHGVRQRCRPRDYG  
FPRAVAPKAKSFQGFQTDIVKATIPQKGFAGNYTGRIAIRFRPSFRLNAGVKPFVHPKYLTTVQKSDG  
YEYRFSK

>ISC2-2A\_GS *Geitlerinema* sp. PCC 7105

MSNFVFLDNTNRQPLTPCHPARARELLAKGKAAVYRRYPFTIVLNRAVGDVPPESQLNASTPLASTSLAS  
TSLSVESSTPLRLKIDPGSQTTGLAVVNGNLVWGAELQHRGDRIQAKLETRRVCRNRNRNRQTRYRKP  
FLNRTRPKGWLPPLNASAPLSVESERSRGLNHRVKTTLTWVNRRLKLCPIASISQELVRFDTQKLQNP  
ISGAEYQQGELFGYEVREYLLEKWGRKCAECSTENVPLEVEHIHPKSKGGNDRISNLTACRPCNQSKGN  
RNVREFLSGKPSVLDCLLRQAKAPLKDAAVNATRWKLYQRLKETGLPVEVGTGGQTKFNRTRELPKAH  
WLDAACVGETPSLHLVTETPMAILSKGRPTRFRTLIDRYGFPRAVRKTKAQVNGLQAGDIVRATVPNGKY  
RGQWTGAIAGVREKRPPALRPFPGKQLDLTAQTQIHVIHKQDGYEYGINPCGHSSRR

>ISC2-2B\_GS *Geitlerinema* sp. PCC 7105

MSKTNVFLDNTNRQPLTPCHPARARELLAKGKAAVYRRYPFAIVLNRAVGDVPPESQLNASTSLSVESE  
RSRGLKIDPGSQTTGLAVVNGDKLVWGAELQHRGDRIQAKLETRRACRRSRRNRQTRYRKPFLNRTRPK  
GWLPPSLNASAPLSVESERSRGLNHRVETTLTWVNRRLKLCPIASISQELVRFDTQKLQNP  
ISGVEYQQGELFGYEVREFLLEKWGRKCAECRAENVPLEVEHIHPKSKGGSDRVSNTLSCRPCNQSKGN  
RNVREFLSGKPSVLDCLLRQAKAPLKDAAVNATRWKLYQRLKETGLPVEVGTGGQTKFNRTRELPKAH  
WLDAACVGETPSLHLVTETPMAILSKGRPTRFRTLIDRYGFPRAVRKTKAQVNGLQAGDIVRAIVP  
NGKYRGQWTGAIAGVREKRPPALRPFPGKQLDLTAQTQIHVIHKQDGYEYGINPCGHSSRR

>ISC1-1\_CC *Coleofasciculus chthonoplastes* PCC 7420

MIRVPVLSPKGKPLMPAKASRVRRWLKSGKVKVIRNDLGVFVQVQVKEPSGEQTQDIAAGIDPGKLF  
TGM AVQSKSVTLFLAHLNLPFKTVTKRMQGRAMMRRGRRRINRKVPYDQRNHRECRFDNRKGHKIP  
SIRANKQLALRVIQELSKIYPFTHVLVEVIKARGDKGFSPAMVGQYWQIEQLEQAGYTVHTQEGWHT  
SNLRKYLGLPKSKNKAEESPAHAHVGDICLAASRFIRYRQIKGRSGTFLGSITVTPCQFAVISRSPIC  
RRQLHLMIPGKGGKRRHYGGTLTRHGLRKGDYVKAEKAGITYYGYVSGDTKTQVSVSDAKWKRIGR  
FTTKKVQLLQRNTGLVSTVGLSNLALSEVEGRGLTSIPLRPTSLRSESHEVVKRW

>ISC2-1\_YF *Youngiibacter fragilis* 232.1

MPTNRHGKVKHLLKDGKAKVRRTPFTIQLLYDSPEYTPQIPITLGDVAGSKVVGLSATTEKKE  
LKFVSEITL RDDIPELLSTRRQNRTRRNHLRYRMARFLNRTASKKEGWLAPSVKHKVDSHLK  
VIGNVHRILPISRIVI ETASFDIQKIRNPEISGREYQQGEQLGFWNTREYVLWRDNHECQ  
HCHGKSKDRILNVHHKESRKTGGDSP GNLVTLCE  
TCHKSHHAGRIKLTLPNKSYRDASFMGIMRWYVYNSL  
KELYPEVSMTYGYITKNNRIRNNI EKTHSADAYCIS  
GNMNAIRIDEIYNQAFKRKHNRQIHKANFLKGGK  
KLNQSAYEVKGFRLFDHVRYRDE ECFIFGRRTS  
GYFDLRKLDGSVVHRSASFKEKLLKQRNTILIERK  
GCNGVLLS

>ISC2-1\_SM *Salipiger mucosus* DSM 16094

MSNYVFLDDARRPLSPTSPARARQLLRDGKAAVFRYPFTIILKRKVPDAEPAPVEVKIDPGSKVTGLA  
LVQGDVWLGELTHRGHQIRERLQMRRERRRGRRNKLRYPYRTKAQINNADRKRKKGWLAPSLMHR

VETIMTWMDRFRRYAPASSIAMELVRFDLQQMQNPEISGVEYQQGDLAGFEVKEYLLAKWGRKCAYCGAE  
GRPLEVEHIQPRSRGGSNRVSNLTLACEPCNQKKGNRPVEDFLSGRPDLLARIRKQAKQPLRDAASVNST  
RWALFTALKMTGLPVTGTGGRTKYNRKRMGWAKAHWLDAAVGNVDALTLRTDKPLLI SAKGQGGRRQKG  
VFDKHGQPRRNKAGAAQIRPLKPIHGWRSGDI AKARGLEGRISPRTRGNFELRAAGQKPRSFPFPRDFKAI  
HRNDGYAYQ

>ISC2Y-1\_KR-IscBKtedonobacter racemifer DSM 493

MNVVYVLSSEERTPLMPCQPAIARLLLKQGKAKVRHRTPTTIQLLAQPEHVYTQLLTHGVDTGSSIIIGSAV  
ANEHGHVVYLSEVEIRNDIANTMKERARARRNRQRKTRYRPARWLNRRKKSIIKTGRFSPTMRSKIDTHLR  
EIRFIRSLLPITSTILETGSFDPHALRNPEVLQKKWLYQRGINYGFANTKAYVLTDRDGYLCQCKGKSKD  
RRLEVHHIIFRSRNGSDEEANLLTLCKTCHDGLHAGTITLKLTKGKKGTLQHATQMNSIRTQLLKRVEAE  
ETWGFVTKEHRLLVGLPKHEHIFDAAVIATRQVKTPTFYTTSVLSKRCVSDGDYKQTKGKHGQQRVNTGKIM  
GFRKFDKVYYLQKEYFIKGRMSTGYAILMDIDGNKIEFKPLPKFDMKRV SARSSWMMKQRTTPNSSFSI  
TSSLSASAGKNV

>ISC2Y-1\_KR-IscAKtedonobacter racemifer DSM 493

MDDETKNHAKFLILYHLIFVCKCRKKRLMRSGDETKRIFEVIATQSDVSFETMEVDKDHIHCLVKSEPRI  
APLAIVRRLKQESTLQLWQMYEDELRRHFWKERTFWSGDGYFCRTVGDASQGTTRRQYIEDQG

>IS607-1\_KR-TnpBKtedonobacter racemifer DSM 493

MDPPVSKKPKQKASLDEKKRKRKKKTKQTITRAVTHIRLIEANPGKLEALDQLVAVYLPLCQQYTTLFCE  
AETSPDKYQETVFKTDLSRDLHRVAIQQAAGIAKSVRTNRANAYQAYLEDVADYAQAKAQAEGRMSAFKR  
REPTWTEWDLPLVLRVPIQANVNVVLEKSESDSTFDYWL RVSTLDVGNPLRVPVKLASYHKRALEGRTL  
ASTTLHKRNGVWWLTL SFDEEDVPLQTKPDAPT VGDVGVIAHFLTSTNKAYGSFHGKMARQHKHDREKRR  
RKAKLRACLEKKGVPKGLPSTSETSQRSLRHKQEINRAVNALVKDHRDARLIYEDLVASMRFKARV  
MNSYLYASHLGHIPQLAWAAAKQGMAAHTVRAAYSSQECPRCHYVDRANRPNQKTFKCLVCGYADQADR  
KAAQTLAGRWGDRKLAACRSTSEVKALLMTRHEAWKQQNQRIQDAGPPVQLSFWDPPEMFLESSHE

>IS607-1\_KR-Ser Ktedonobacter racemifer DSM 493

MKLSSYAKKIGISYNSAWRMWKRQIPGYQLPTGTVIIDPELRSVPVHAVAVYARVSSSENKDNLERQA  
ERLVTWCNAQGSVSKVKECGSGINDQRPKFLALLADPKIGQIVVEHKDRASRFVAYIQTL LAMQGRK  
LVIVNTADTAEDDLMGDFISIIIPSF CARLYGRRQAKRTEQVLAALQONGPACEQEAPKSLA

>IS605B-2\_KR Ktedonobacter racemifer DSM 493

MPKKCQGQRKKKEQEKRPATPTFLLELPLAVDPGQAARLRSHLEAARQLYNAILSQGQQLRRMRSDPA  
WQEARALPRTHKAERAAAFSALRKAHGFSEAALHEAVKGLRVGWIAEHIEAVLAQTLATRAYRALNRVCL  
GKAKRVRFKSRGRGFSSIENKRNDTSLRFVLQPPEEGNAGSL LWNGDPLPALIDWKDEVVTHGLRHRIF  
ARLIQRPASSPRAAGADEEGYRYVVQLALEGKPHRKKKHPVGT SIVGGDLGPSTLALFPQQGEASLEVFC  
AQLAPDAKAIRRLQRQMDRQRRAANPEHYDEKGR IKKQGGKRRHWKQSKRYQATRQRKASKERKLVAHRK  
SLHGHKVHVQVVLGTTIIIEKISYKAWQRQFGKSVGLRAPGMFVELLRRTVESTGGILVARPHTHHRAEP  
VVSWLWQEAQEAFAALASVRVWRGSRATRPFVGVSGCLP

>IS605B-1\_KR Ktedonobacter racemifer DSM 493

MDRTVRIQLQPNTEQSHVLQETLVQFTVAYNHVCVYGWQHCEKNGVRLHHATYYETKSLCPLVSDLLIQ  
ARVKATETLRSFTWKAKKEASYPKAVANAQKQGPAPLFPKPVRCPSSEQC AVRYNVHTYSLNWETQITR  
VSTTQGM TLPFTVPHFSERYGCNIATADLIHRK GKWWLHVVVNVPEPVVQANDTVVGVLDGLNRPAVT  
SNRHFLGSRHWKEVDRRTFRLRRLKLSKGTTS AKRHLKLSRKQMLFHRDCDHVLSKRIVQSVTPGATIV  
LENLTNIREGVRHRKGEQQRKLHSWSFAQLYGFIVYKQGEQGMVVERIDPRHTSQTCSRCGHQARNRRS  
QSVFHCRCSCGYQLHADLNAAYNIRDKFCLAQGGRPVLSGSLSDVLSHSHA

>ISC1-1\_MA Microcystis aeruginosa NIES-843

MARVPVISKDGLSLMPTKPSRARRWIKGKAIGKFNLDLGI FVYQLIDEPSDSKTQPIAIGIDPGKLFSGI  
GVQSSLF T LWKAHLELPFKRVKERLDNRRLMRGRRRINRQLSFNLRAHRQKRFSNRKQGLLAPSIRA  
NRQLELRVVSELTKIYPITDIYFEYKADVDLTSGRKGAKSGKGFSSVMVGQKWAIEQLS QLATVHTRFG  
WQTSNLRKYLGLEKSKNAEQSPESHANDGIALACFQFLDYWPFHNYNGHGYDWKGSVKVTNAPFAVIKR  
PPISSRQLHLMVFSKGGKRRKYGGSTTRHGFRKGD LVSSPKGIGYVSGDTEKQLSVSDTNGQRLGQIAVS  
KIQLIRRSNGLIVSH

>IS605B-1\_MA Microcystis aeruginosa NIES-843

MEKAYSRYFYPTPEQESLLRRTLGCVRLVY NKALHERTQAWY EKQERVGYAQTSSMLTDWKKQEELDFLN  
EVSCVPLQQGLRHLQTAFTNFFAGRTKYPNFK KKHQGGSAEFTKSAFKFKDKQIYLAKCTEPLP I RWSRQ  
IPESCEPSTVTVRLHPSGRWHISIRFDDPTIKPLPVTDKAIGIDLGISSLVITS DGDVSNPKHFKKH  
RLRKAQKSLSRKQKGSKNREKARIKVARIAHQITDSRKDHLHKLTTQLVRENQTIVVENLAVKNMVKNPK  
LSQAISDVSWEITRQLAYKCRWYGRNYIEIDRWFPSKRCSNCGYIAEKMLNVREWDPCDCGTHHDRD  
INASKNILAAGLAVSVCRATIRPEQSKSVKAGAKNPSGKKQKPKS

>ISC2-1\_NH Nitrosococcus halophilus Nc 4

MNRVFLDTRDKPLMPCSPARARLLRDGKAAVYRMQPFTIILKYRVDPNPQPVEFKVDPGSKITGLALV



GNFPQQGRVVLWAANLTHRGYAIRERLASRRSLRRGRRGRKTRYRAPRFLNRTKPKGWLPPLNSRVENV  
SSWFNRLDRVPISECHIETVRFDTQKIQNPEINGVEYQQGELMGYEVREYLLEKWDRKCAVCNKKDIPL  
EVEHIIPRSRGGSNRVSNTLARAPCNKKKNSKTAAEFGYTOIQSKSLPLKDAAAVNATRYAIGCTIQS  
VGLPTSFWSGGRTKKNRISQGYTKDHWIDAACVGESAEQVTITEGYRALHIKATGRGTRQVVRTDKYGF  
RGKAGRCRRVKGFTGDLVRLSQPQKYAGDHVIGILASIRASGTFDVKAKAGKISANWINFKLIQRGDY  
DYSLSAV

>ISC2-1\_HM Nitrosococcus halophilus Nc 4

MAIFVLDKKKQPLMPCSEKRARLLLQRGRAVVHKRYPFTIRLKDVRGGSTQPLSLGIDPGSKTTGLALIR  
EPDSQQRHVLCLEFELIHRGYQIKKALQQRAAFRRRRRSANLRYRAPRFRNNRTKPKGWLAPSLQHRVDTVT  
AWVNRLNRLAPVTAISQELVRFDTQKLDNPEINGVEYQQGTLGVEYREYLLEKWGRECAYCGTADTPLE  
IEHVIPRSRGGSNRVSNTLSCHPCNQSKDALSLVDFATDKGLKRLKANGHTANARLERVQRQLKQPL  
RDASAINATRWALFNALKATSLPVAVGTGGRTKYNRQRLGIPKTHALDAACVGAFDALHAWQVPTLTIKA  
MGRGSYQRTRTRVSAWLSDAEAGARLSNRRHGACDGTDWQESRYPYGACRGTQNRQF

>IS605B-1\_HM Nitrosococcus halophilus Nc 4

MTKRAYKYRFYPTPEQAELLAQTFCVRFVYNSILRWRTDAFYQRQEKVGYVGANARLTELKDDPELAFL  
SEVSSVPLQQCLRHQQTAFKNFFEGRAKYPVFKSKRHRQSAEFTRSAFKYRDGKLYLAKSKTPLNIRWSR  
ELPGEPSTVTVSKDSAGRYFVSVCLCEFEPSKLPVTSNMTGIDLGLKDLFITDQGERVGNPRHTAKYAARL  
AKAQRRLSKKKLGSANRAKARQKVAKLHAKISDCRQDNLHKLRSRLINENQVICVESLKVKNMIRNP  
KAIADAGWGEFVRQLAYKAEWGGRSLVAIDQWFPSSKRCSGCGHTLSSLPLTVRKWNCPECGANHDRDN  
AATNIKAAGLAVLALGENVSGMASV

>ISC2-1\_MS Marinobacter sp. ELB17

MSVFLDRRKHPLMPCCTERRARLLLDRGRAVVVRAYPFTIRLKDRTGGITQPVRKIDPGSKTTGIAVVR  
ENGQKQHVLALMELAHGRQISKSLEQRRAFRRRRRNQLRYRAPRFLNRTKPKGWLAPSLQHRVDTT  
VNRSLVPPVVISQELVRFDTQKMNPEVSGVEYQQGTLGVEYREYLLEKWGRECAYCTDKDTPLQIE  
HIDPKANGGSNRI SNLTLACRPCNQEKDRKSLVSFFATSKRLKNHQARLDRIKQCKPLRDASAVNSTR  
WALYQTLKQTGLPVEVGTGGRTKFNRCRLRIPKTHALDAACVGEVEIVEGWDVPTLAIKATGRGSYKRTR  
LTKHGFPRGYLMRQKQVQGFQTDGMVRAVPTGTAKGTWLGRAVVRKTGSFNIQTNSGAIQGISHRHCVL  
TQRADGYGYHIQPNQRKEEGDRKNESR

>IS605B-3\_KR Ktedonobacter racemifer DSM 493

MKQTI IAKLKLHTTSEQLAQLRNLQLAYRDALNYVSRYAFEHGKMSSKRRLQEGTYQELRVLYALPAQMA  
CSVPRQVGATYKGLWTKYKHAASRKAGVTKKRYKGLDQPPRYLSPTVTYQQGRDYGFKTEQRVSVLTL  
GRLILPYSGERHVALIEQGTSIGTAQLWYDQRKKRKYLLVALSLELPDPEPGDLPQVVGVDVGRRYLAV  
TSTTTGSGDPLFFLGKEAVAQADHYTRLRKLQKGTGRGAMRVRAIEQRERLKAETNHCISKRI IHRH  
PASLIGLEELTDIRERTKPKKHRRTKQKSSSELVSPKQRRENRRRSQWSFAQLQAMIAYKAMLAGSVAIK  
VDADYSSQACPRCGHTARANRPGKGLVFVCQNCHYTLHADLVGARNLVLRTLVLVWQDWARDGLLSVAPDT  
SDSEAKAARLSRYAELRWSPDASPSLQRWGH

>ISC2-4\_KR Ktedonobacter racemifer DSM 493

MSRVLIVDAERRPLMPCTPARARLLLKAGKAAILRRFPFVLILREARPEAVVEPLRVKLDPGSKTSGIAV  
LHEQSGEVMWAAELTHRSTPLREALAKRRAVRRSRRSRHTRYRAARFANRRRPKGWLAPSLSRVLHLLT  
WVKRLSRWCPVGALSLELVRFDLALLQNPSIEEVEYQRGTWLGTEVRQYLLDKWQHRCTYCQASEVPLEI  
DHVSPRSKGGSHRIANLVIACRPCNQAKGDQPLESFLANRPDVLARVQVQRRAPLHDAAVNSTRWQLYE  
RLKALDLPVETGSGGLTKWNRQSRNLPKTHWIDAACRSTPERLQIRHVRPWL IQAQQGRQARRMNVNVDK  
RGFPRGKAKGPSGICGLRTGDLVRAVVTGKKIGITYVGRVAIKSDGYLKLTVRPFMGVEGIHARYCRPVH  
RNDGYAYAQQEAAALPPQA

>ISC1-1\_KR Ktedonobacter racemifer DSM 493

MRIPVVDTRGIALMPCTPAKARHLLKSGNARPKRNKLGFLFYVQLSYEQEPDNQSLVAGVDPGSKFEGLSV  
VGTKDVTVLNLMVEAPDHVKGAVETRRTMRRARRQRKWRPFRHNLNRMQRIPPSTRSRWEAKARIVAH  
LRTILPFTDVVVEDVQAVTRKGKGGTWNGSFSPVQVQVKEHLQQLLEMGTLHLHREGWQTKELREQHGLK  
KTKSKSKQSFESHAVDSWVLAASISGAEHPTCTRLWYMPAILHRRQLHRLQASKGGVRKPYGGTRSLGV  
KRGTLVEHKKYGRCTVGGVDRKRNTISLHEYRTNTRLTQAAKVETCRVLTWLSWRSWLI RGKHTSSKGGK  
SHPS

>IS605B-1\_OS Oceanimonas smirnovii ATCC BAA-899

MTKRAYKYRFYPTPEQTELLAQTFCVRFVYNAILRWRTDAFELRQKIGYVGANARLTELKDDPELAFL  
SEVSCVPLQQCLRHQQTAFKNFFEGRAKYPVFKHKRHRQSAEFTRSAFKYRDGKLYLAKSKTPLNIRWSR  
ELPGDPSTVTVSKDSAGRYFVSVCLCEFA PGKLPVTPNMTGIDLGLTDLFITDQGERVGNPRHTAKYAARL  
AKAQRRLSKKKLGSANRAKARQKVAKLHAKISDCRQDNLHKLRSRLINENQVICVESLNVKNMIRNP  
KLSKAIADAGWGEFVRQLAYKAEWAGRSVLAIDQWFPSSKRCSGCGHTLSSLPLSVRKWDCPECGAHHDRDIN  
AATNIKAAGLAVLALGENVSGMPVSVSGSR

>ISC2-1\_ML Methanosarcina lacustris Z-7289

MIFVLNKNKQPLSPCHSAVARKLLKTGKAVIHKKYPFTIRLKLKLNSENKAEFRLKIDYGSRHTGLAILN  
GSKVIGLAQIHHKTSIKSNMDSRRAMRRTRRNRTTRYRKPRFNRRKRKEGWLPPSLQSRVDNIQNWNRL  
QKLCPLTHISYENAKFDTQLMQNPEISGIEYQOGELQGYEVREYLLKWNRKCAYCGAENVPLEIEHIIP  
KARHGTSRVSNTLACRTCNEAKGKTAEFGYPDIQKQARIPLRDATLVTATRQWVYNVLAETGLEVEC  
GTGARTKMNRIRLNLPKDHFDACVCGASTPKDIIKFTNSVLHIKAKGRGSHCRTNLDKYGFPRGYLSRQ  
KSFFGFQTDIVKAVVPGKYGIHFVACRKTGYFDIKNKEGVRIGQGINHKYCNILSRADGYEYATE  
HLEVDGIPPTTEVIGILP

>ISC2Y-1\_CH-IscBClostridium haemolyticum NCTC 9693 plasmid p1Ch9693  
MVYVIDINGNPLMPTNEAKARKLLKNKKAIVKELKPFQTVQLNYETSNYTQRITLGDIDSGYLNIQFSAITD  
KKELIVGEVLLQGIKDRIOEKAMYRRQRRNRLRYRKARWNNRRTKSKHKGWLAPSLQHKLDLSDHIFIDSL  
YVNLVPIKCVVEIANFDIQKIKPNPISGEEYQOGEMMGFWNLREYILHRDNHKCQPNCKNKSKEQILEI  
HHIKYRSEGGSDSPNNLITLCSKCHTSPNHKKGKFLYDWCINGKKVRGFKDATFMSMIRWYLINTLKEKH  
SNISITYGYITKNHRITHKIKKTHYNDAFAIAKGINQIRNNDI FNVSQARRNRSLEKFDYDCKIIDVRTG  
NKVSGDLNCGRRTRNKNHSTENLRIYRGEKISKQRRIRKQKYFYQPNDLVRYEGKIYTVKGSQNGGKY  
VALKEIKKVPKVDLLTPYKFKGQGFVYIEIK

>ISC2Y-1\_CH-IscAClostridium haemolyticum NCTC 9693 plasmid p1Ch9693  
MKYISKNHSKFLMLTHLIFVCKYRKKLLIRLGDDIKKLFYAI AAEKDLNIIEMEVGKDHIHLVQYSPTQ  
SILQIVRWFKQISTYRVRVVGKTQYYLNNHFWQERTFWSGDYFACSIGKVSKEKIEKIYIQQQG

>ISC2-1\_AF Anoxybacillus flavithermus TNO-09.006  
MVEENMTCFMQRKGENPMVFLDTNKRPLAPCHEAVARKLLKQGKAAIYRRFPFTIILKKSVDSEIKAT  
YRLKIDYGSRHTGLAILRGQEVVWLGQLDHRDIDKERIDKRRAFRRARRNRKTRYRKPRFLNRKRKEGWL  
PPSLESRVQNIQTWVDRLKKICPIGHISYENAKFDTQLMRNPEINGVEYQOGTLQGYEVREYLLKGFGRK  
CCYCGKENVPLEVEHIIPKSRGGTDRVDNLCLACHDCNQRKGSKTAEFGYPHIQKMKVETLKDTSAILK  
DRWKVYEVVKQTGCDEVCGTGARTKMNRIRLGLPKTHYFDACCVGESTPLHLHFKTKEVLFIKAKGRGSR  
SRTNLDYGFPRGYLARQKFFFQTDGMVKAVVPRGKYQGVWFGEVACRKTGSFDIKGKDGKRIAQGIN  
YRYVQVIQRFDGYAYGKVAELA

>IS605B-1\_AF Anoxybacillus flavithermus TNO-09.006  
MINHAGNPCFQAWGGMRFFVYFSLKKYKIKLVKGGEDMKLTLTAKIKILPTSEQEQLLQKTMQAYRDACN  
AVSEVIYKENTLVQAKLHKMTYRKLRSFGLKSQMAQSVLKTVIAKYKTNTQTNHGRKQIAFKKPKIDLV  
FNRDYSLTGKLFINTLEGRIKVPFQTKELTYFDGTWTFGTAKLVNKHQKWFHLHIPVSKEMEEANLHHI  
CQVVGVDMGVNFATVYDSNGQTLFFKGRHIKHKRAKYQLRRLQKQTPSARRRLLKIGQRENRMQD  
VNHCISKALVERYGKNTLFLVLEDLTVGVRQTEKVSVNHRVEMVSWAFYDLRQKIEYKAHKHRAKVIVVDP  
TYTSQTCPCGKHEKANRNKKTHTFCRCCTCGYTSNDDRIGAMNLRKGIIEYIIVEGTTQA

>ISC2-1\_AH Anaerostipes hadrus  
MSVFFVGLNGCRLMPTSERKARLLLKHGKASVYRQVVPFTIKLNYKTGSTTQSGYLIGDITGSQHIGVSVVR  
EDGTVLHKEEIGLRDSMSKRKLMQSRASSRRGRHRKTRYRHPKWRPKAKRVYCEIPDRKGRHWKKEIT  
FASKRAKGWLPPSLQSKTDHIIWWIKKLQDLLPEGYRLSIELGRFDPARLKDPEIHGELYQKGPQYDYEN  
VRAYVLRDRYTCQVCGKKGKLVHVVHIIYRSHGATDDPQYMATVCSDCNHTENHQQGGIYLQWQKQK  
FTRGLRDATFMNILRKLIEAFPGATFYGNITKADRERLRLPKSHGNDAIAIAIVKTGIMTVKDKEPVI  
YIQQVRRKRSLSHEETPRKGRKEPNRKASRYDKNTKAVTVTKRKNKKKITITGCLFDRVELNGKKGWISG  
FTDKSCYVKDENDQYIRTSPKYKQVSLSKLILHHCNWAIGARQSLGK

>IS605B-1\_AH Anaerostipes hadrus  
MIFIFSKISHIYSERKPTERRKFFYMPKARRRDKSEFQTSVTKSVFLYGTPNVQKRSALKEMQRLFIKLVN  
HNIRLLDQETSIFFFQIVKNDKKSQIRRELEKTNRPKGINS AFCQNAFDVAVTHLSNRLDNIRLDMIADGF  
GIFAKSKVLFAMYIMGRSRTDMIQTMNKIGQKFHKECAKLSAMTDAEFYDIRVRFDAYAARSIEYKVP  
ELRNVSIPLDSRLMRLEKSTDTVMPYVITISDPTGGKRIAVPIDTSRHSLHKIEANRLGGTVMLQMRGPV  
LRIGWSYTVKREKPAVDYIIGVDTGITDALYASDGRHVGSMKRVIDFYHVEEVETAFAELSDLRNKKRKC  
HYLHSHDLSIEDVRRSLIQVDQLEHMMQTMVEVPYRKKRHHYYQMLDQEI KAVSSYLNLDLAKNTMTVLEKL  
DIREFNKSKKANGKLSMFARGKLQQLMILTNLWKG YDFMEVVPDFTSQVCPVCGNL DADRKDKAFKCTC  
CGHEDDADHNASVNIKERANDKEILAVSKKYEYQHKKLQEQALRQIYADRC SAYKKAASI

>IS605B-2\_AH Anaerostipes hadrus  
MARAYRRKDSTFETSVPKSVFLYGEPNKAKLHLLSRMQORFCELANENIRTICETDGLFLQLVKNDKKS  
VVRKLEKQFRPAGLNSAFCQAADYAFTRLNRIINTIRKDMAEDQTI FTQSKVLFAMSLMRQSKKEMSA  
VMKDLANRKNRNI SFYKDCADTLDSLDEDEFRLFMLQELVDSYAVHTAEYRIPHISRTEVPLDSRLMRIE  
ESADIKAPYVIVSVDTPFNRNKR FIVPLNTSRHSLHKIKSNK MAGSVFVCKVGNL RVGWAYTRSVKQPKT  
SVIRGVDTGITDVFHTSDGNAIGSMKPVLDYHSTVEPSFAGLSDLRNKRSISHYLRHHKALPEDVRRS  
LIQKMDRLDEMMQTMNAPYRKKRRYYGLLDQEI RKSVTGYMDGLKRDTLTVIERLDIKEFKSRKVNGMF  
SCFARGKTQEALMRALNWKGYDFIEVAPEFTSQVCPVCGNLD RANRDGKFRCTCCGYEDDADHVGSINI  
RERAVNKDLM DICEKHRYGKGLQNALKGY YMEQNKRFKKQHPQGMVS

>ISC2-1\_HH Halobacteroides halobius DSM 5150  
MILRQRREVPIMEVAEMPKNKYAFVLDSKGLKLLDPTKSKKAWYLIRKKGASLVVEEYPLIIKLLKREVPKDQV  
NSDKLILGIDDGTTKVGKVFALVQKQCTKNKVLFKAVMEQRQDVSKKMEERRGYRRYRRSHKRYRPARFDNR  
SSSKRKGRIPPSILQKKQAILRVVNLKYYIRIDKIVLEDVSDIRKLTGREGLYNWEYQESNRLDENLR  
KATLYRDDCTCQLCGTTETMLHAHHIMPRRDGGADSIYNLITLCKACHKDKVDNNEYQYKDQFLAIIIDSK  
ELSDLKSASHVMQGTWLRDKLSKIAQLEITSGGNTANKRIDYEIEKSHSNDAICTTGLLPVDNIDDIKE  
YYIKPLRKKSKAKIKELKCFRQDLVKYTKRNGETYTYGITSRLIKNNKYNSKVCNFSTLKGKIFRGYGF  
RNLTLNLRPKGLMIV

>ISC2-2\_ML Methanosarcina lacustris Z-7289  
MLVFVINQNKPLMPCKPSKARKLLQAGKAKVVRNTPFTIKLLFGSSGYTQPVIAGMDTGSKVVGCAAIA  
NGKVLVYQSEIYLRENVSKKMEQRKMYRTRRRGRKTRYRPARFDNRGNSRREGRLAPSIKSKLESHFREKR  
FVESLLPVTGWKVELASFDIHKITNPEVSGVGYQEGDLKGFYNVKAAYVLRDGYTCQHCMGKSKDSRLHC  
HHIVFRSQKGS DAPENLITLCECHKALHNGEFKLSGNKSKTKHATEIGILKSQIRKSGWSFAETFGYET  
KYRREQVLKLLKTHYF DAVAICCRDDQKVEVEDSVFLKRNVPAGDYQQRGKRSEKKIPTGKLFGLRKF  
LVKTENGIGFIRGKRSSGYFSISDIFGNKISDSVNVKKKCRRLSARSTTLVQMVQMT HSSPTCHFRQAGN  
VEEGVSC

>IS605B-1\_ML Methanosarcina lacustris Z-7289  
MLRGNRYRIYPNKEQKALMEKHFGSCR FVYNKLLLEIKSLMYKKFRISLSEFDLNNHLLVLKEVYPWLKEV  
NAGALQQASRNLNKAFTNFFNFGFGYPQKKKKDHHFSFQIPQHYSLDTSISKVLLPKFGWIKVKMHREI  
SKGSLKTITISRTPTGKYIISFLTNDGEKLEPEKQEF SHATLIGIDVGVTTFATLSTGEKIDNPKFLKNSL  
ERLKLQIRVSKKVKGSKNRRKAVYKLTKIHEKISNQRHDFQHKVSNRLISENQAI AVETLNIKGLKKNH  
KLAQVISDSAWYSFVLKLT YKA EWGKTILKIGMFEPSSKTCNVCGYKLEKELSLDIREWQCPDCKNTHDR  
DINAAINIKKIAVGTTV

>IS605-1\_NS-TnpB Nostoc sp. PCC 7107  
MTFRLYPNEKTELILRYHRKLHKDLYNAAVNNRNFNQYKIYNHKVDYFEQQNCLPAFKDVWVEYKELPSHA  
LQATLKRVDFAFERWFKGLGKRPRFKSIRHYSGWTPDCAGFKVESEGENGYLNLSKIGRIQMRGQALGW  
GKSTTCTIVYRNSKQWYASITVDVLDQALKPKVLPVGAIGIDLGCKAALSITDGENHQIDAPKFLR NAEQ  
KIKKASKEKRRKRPNRNKKIKASRRYKKAQSKVTKLVRKVGNRQNRQNVHQA AEIVSGNSFVATEKLEV  
KNMTSKAKKGRKKQKAGLNKSI LDVAFGMLRNTIKYKVEQIGGVFVEVPTKKVKPSQTC PKCGHQHKK  
LDIRVHNCVVCYVQDRDIAAAEVMLYWSKGTLPGLGTSLVVAESPSSPTSTGKRKQSGSMRQLGAKKRQ  
KSTEKLAKNELGDVETHSSGEANCG

>IS605-1\_NS-Y1 Nostoc sp. PCC 7107  
MLSRKGS HAVFSIHLHFVITKYRKKVITAPILERMHEIFANICIKTNCILVEFSGEEDHVHLLVDYHPD  
NNISDFTSSLKSASSRVIRKEFKHEIEKFYWKPLFWSSSYVASSGGAPIDQLRQYIKEQDAPTE

>IS605B-1\_ME (1277..48) TnpB  
MYLTQKNHLRADKQTYETLKRRLTKLSKNLYNFTLYTIRQYFFNYGKYLNKNTAYHTVKENENYRLMPSQV  
AQNTVETVDGSMKSFFKLLDKKRKGEYEKPVSLPKYLDKDNFICTFKKDLKVIDDKIRLSLGP EYGR  
YTRYLYFKIPDNIIGQYINQVRIVPKYKGRWFEIEFVYHEDGEIAELDYN SHLSIDLGVDFATCVTTS  
GTAFILDGRGIKSYNRWWNKEKSRLQSVYDKQNVDDGIKMDRFSNKRFWKINDFMNQCVNHIVKHCL ENR  
IGNIVIGEMKEIKQEONIGKKNQNFQTI PFARFKQKLASKCEYHGIKYHEVDEAYTSKVDALALEPIRK  
HKKYLGRPKRGIFQSSTGRLINADINGALNLRKVIGDSLAGITDSGDVNSPGRIRLSR

## Supplemental Figure 2.

***ISC2-1\_KR* transposon is inserted into the middle point of the GTGG target site without any target site duplications.** In the pairwise alignments of three repeats (Rep1, Rep2, and Rep3) harboring copies of *ISC2-1\_KR* with the sequences of the corresponding copies of the repeats free of the transposon insertions, the *ISC2-1\_KR* sequences are in red, while the identified GTGG target site sequences are in green. The internal parts of *ISC2-1\_KR* copies are marked by 'N's. In the alignments, coordinates of the corresponding sequences in GenBank are indicated in the top sections, The Rep1 and Rep2 insertion-free sequences are replaced by their consensus sequences.

### 1. Insertion of *ISC2-1\_KR* into Rep1

S: Rep1 (consensus from 3 copies) 1 144  
Q: gi|297545792|gb|ADVG01000005.1| 517283 515550  
Identity = 88%

S: CTCACCCGTATTACAGTAGAACANGCGTTCATTCATGAGAACCAGTCATAGGAAGGCAGAGCAGG  
|||||:|||||:|||||:|||||:|||||:|||||:|||||:|||||:|||||:|||||:|||||:|||||:|||||  
Q: CTCACCCGTATTACAGTAGAACATGCGTTCGTACGTGAGAACCAGTCATAGGAAGGCATAGCAGG

S: GT-----  
||  
Q: GTCAGGTACCTCATGCCTAAAGGCAGGGGCTTGTGAAAGCAAGCTCGACCTGTCCAGACTTAGCCATGG

S: -----  
Q: NNNNNNNNNNNNNNNNNNNNNNNNNNNNNNNNNNNNNNNNNNNNNNNNNNNNNNNNNNNNNNNNN  
S: -----GGATGTTGAGTCGCTCCA  
|||||:|||||:|||||:|||||:|||||  
Q: GCTCCTCCCATGGCTAAAGCCAGGGGTCCCCGTATGGCGCAATTTTAGATGGATGTTGAGTCCTCCA

S: TCCTTCTGCTCTGCTGGCACTGCACGTGCAACAGATAGAGCCTGGCTCTCTGT  
:||:|||||:|||||:|||||:|||||:|||||:|||||:|||||:|||||:|||||:|||||:|||||:|||||  
Q: CCCATCTGGTATGCTGGCGCTGCACGTGCAATAGATGGAGCTTGGCTCTCTGT

### 2. Insertion of *ISC2-1\_KR* into Rep2

S: Rep2 (consensus from 10 copies) 1 144  
Q: gi|297544026|gb|ADVG01000001.1| 2707943 2709664  
Identity = 87%

S: TGAGACGCACCGTTGCAAGCACGGGCGGCACCCTSGTCGAAGTCCACACGCACGACGGCGCTGAGCCA  
|||||:|||||:|||||:|||||:|||||:|||||:|||||:|||||:|||||:|||||:|||||:|||||:|||||  
Q: TGAGACGCACCGTTGCAAGCACGGGCGGCATCCTCATCGAAGTCCACACGCACGACGCCCTCAGTCA

S: AT-----  
:  
Q: GTCAGGAACCCCATGCCTAAAGGCAGGGGCTTGCCTAAGTAAGCCTGGACCTGACCAGTCTCAGCCAGAG

S: -----  
Q: NNNNNNNNNNNNNNNNNNNNNNNNNNNNNNNNNNNNNNNNNNNNNNNNNNNNNNNNNNNNNNNNN  
S: -----GGTGTTCATGGCTGTGGCAAGCGGGTCAAGA  
|||||:|||||:|||||:|||||:|||||:|||||:|||||:|||||:|||||:|||||:|||||:|||||:|||||  
Q: GTCTAAAGCCAGGGGTCCCCGCAATTGCGCAATTTATGATGGTCCATGGCTGCGCAAGAAGGTCAAAA

S: AGCCGCTYCTCAGCGCTGGCAYCAGTGCATGTGGCGTGG  
|||||+||:|||||+||:|||||:|||||:|||||:|||||:|||||:|||||:|||||:|||||:|||||  
Q: AGCCGCTCTCCAGCGCTGGCACCAAGTGTGCCTGTGGCGTGG



**Supplemental Figure 3.** The *ISC2-2\_KR* and *IS605B-2\_KR* transposons have similar 3'-terminal regions. A, The Censor map of 8 regions similar to the 64-bp 3'-terminus of the *ISC2-2\_KR* consensus sequence (positions 1588-1651). B, The 1832-bp consensus sequence of the *IS605B-2\_KR* transposon was obtained based on multiple alignment of expanded DNA sequences of the eight regions similar to the *ISC2-2\_KR* terminus. It contains one ORF encoding the TnpB protein (pos. 1654-275). Although this protein was not similar to CDD (NCBI BLAST), it is similar to a number of TnpB proteins encoded by transposons annotated in ISfinder ([www-is.biotoul.fr](http://www-is.biotoul.fr)) as members of the *IS200/IS605* superfamily. The best BLASTP hit was to TnpB encoded by the *IScbt* transposon (E=8e-33). The proper classification of this protein was also supported by HHpred. It contains the OrfB/TnpB and Zn-ribbon (deactivated cysteines) domains. C, Pairwise alignment of the similar 3'-termini of the *IS605B-2\_KR* and *ISC2-2\_KR* transposons.

A)

|    |  |           |  |    |  |                |  |         |         |           |      |      |   |        |
|----|--|-----------|--|----|--|----------------|--|---------|---------|-----------|------|------|---|--------|
| gi |  | 297545792 |  | gb |  | ADVG01000005.1 |  | 561089  | 561150  | ISC2-2_KR | 1588 | 1651 | d | 0.8154 |
| gi |  | 297554026 |  | gb |  | ADVG01000001.1 |  | 1548921 | 1548982 | ISC2-2_KR | 1588 | 1651 | c | 0.8154 |
| gi |  | 297554026 |  | gb |  | ADVG01000001.1 |  | 2166815 | 2166876 | ISC2-2_KR | 1588 | 1651 | c | 0.8154 |
| gi |  | 297549204 |  | gb |  | ADVG01000003.1 |  | 1191713 | 1191774 | ISC2-2_KR | 1588 | 1651 | d | 0.8154 |
| gi |  | 297546893 |  | gb |  | ADVG01000004.1 |  | 1576276 | 1576337 | ISC2-2_KR | 1588 | 1651 | c | 0.8308 |
| gi |  | 297546893 |  | gb |  | ADVG01000004.1 |  | 2626842 | 2626903 | ISC2-2_KR | 1588 | 1651 | d | 0.7969 |
| gi |  | 297551548 |  | gb |  | ADVG01000002.1 |  | 1958579 | 1958640 | ISC2-2_KR | 1588 | 1651 | c | 0.7969 |
| gi |  | 297554026 |  | gb |  | ADVG01000001.1 |  | 307670  | 307731  | ISC2-2_KR | 1588 | 1651 | c | 0.7778 |

B)

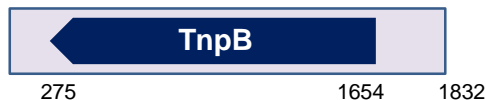

C)

```

IS605B-2_KR      1773 1832
TwoNucs-2_KR    1595 1653      Identity = 77%
Q: AGAGGCGGCATTTCATCCCCGGCATCAATGACCGGGGCTTCTCGCCGCTTCTCTGTAA
  |||||:||||:||||:|::|||:|||||:|:||||-|||||:|
S: AGAGGCGGCAATTCTCCCGCTCTAAAGAGGCGGGCTTCTTGCCGC-TTCTCTGTGA
  
```

## Supplemental Figure 4.

**A**, Censor map of *ISC1-1\_MA* transposons in the *Microcystis aeruginosa* NIES-843 genome. First three columns: GenBank accession number and coordinates of DNA regions significantly similar to the *ISC1-1\_MA* consensus sequence. Columns 5-6 show coordinates of the consensus part similar to the corresponding GenBank region. In the column 7, “d” and “c” mark the orientation of the GenBank regions (d - direct, c – complementary). The DNA identity and Censor scores are listed in columns 8 and 9. Four copies of the transposon, including two with internal deletions are shaded in gray. **B**, Pairwise alignment of similar 3'-termini in *ISC1-1\_MA* and *IS605B-1\_MA*. The ATGA target sites are in bold. **C**, Pairwise alignments of DNA sequences of the *ISC1-1\_MA*-containing locus, 70-bp flanks, with orthologous loci free of the inserted transposon identified in *Microcystis aeruginosa* 9717. The GenBank accession numbers and loci positions are listed above the alignment. The inserted transposon sequence is in red; its target site is in blue. The transposon's internal portion is schematically marked by “N”s. **D**, Map of two copies of *ISC1-1\_MA* in the *M. aeruginosa* 9717 genome. Each of the 140-bp loci harboring the transposon is aligned with its ortholog identified in the *M. aeruginosa* NIES-843 genome. **E**, Pairwise alignment of twelve 140-bp loci harboring the *IS605B-1\_MA* transposons in *M. aeruginosa* NIES-843 with their transposon-free orthologs identified in *M. aeruginosa* 9717. The transposon and target sites sequences are in red and blue, respectively.

### A) Map of *ISC1-1\_MA* copies in the *Microcystis aeruginosa* NIES-843 genome

|                 |                |                |                  |             |             |          |               |             |
|-----------------|----------------|----------------|------------------|-------------|-------------|----------|---------------|-------------|
| AP009552        | 54468          | 54513          | ISC1-1_MA        | 1321        | 1376        | c        | 0.8776        | 82          |
| AP009552        | 496061         | 496107         | ISC1-1_MA        | 1320        | 1376        | c        | 0.8800        | 84          |
| AP009552        | 875264         | 875302         | ISC1-1_MA        | 1338        | 1376        | c        | 0.8500        | 72          |
| <b>AP009552</b> | <b>974217</b>  | <b>975592</b>  | <b>ISC1-1_MA</b> | <b>1</b>    | <b>1376</b> | <b>c</b> | <b>1.0000</b> | <b>4128</b> |
| AP009552        | 1245946        | 1245984        | ISC1-1_MA        | 1338        | 1376        | c        | 0.8500        | 72          |
| AP009552        | 1250298        | 1250336        | ISC1-1_MA        | 1338        | 1376        | d        | 0.8500        | 72          |
| AP009552        | 1380060        | 1380098        | ISC1-1_MA        | 1338        | 1376        | d        | 0.8500        | 72          |
| AP009552        | 1415903        | 1415941        | ISC1-1_MA        | 1338        | 1376        | c        | 0.8500        | 72          |
| AP009552        | 1439543        | 1439581        | ISC1-1_MA        | 1338        | 1376        | c        | 0.8500        | 72          |
| AP009552        | 1482146        | 1482184        | ISC1-1_MA        | 1338        | 1376        | d        | 0.8500        | 72          |
| AP009552        | 1594189        | 1594227        | ISC1-1_MA        | 1338        | 1376        | c        | 0.8500        | 72          |
| AP009552        | 1600904        | 1600940        | ISC1-1_MA        | 1341        | 1376        | c        | 0.8649        | 72          |
| AP009552        | 2071377        | 2071415        | ISC1-1_MA        | 1338        | 1376        | c        | 0.8500        | 72          |
| AP009552        | 2107139        | 2107177        | ISC1-1_MA        | 1338        | 1376        | c        | 0.8500        | 72          |
| AP009552        | 2257893        | 2257947        | ISC1-1_MA        | 1319        | 1374        | c        | 0.8772        | 112         |
| AP009552        | 2352189        | 2352226        | ISC1-1_MA        | 1341        | 1376        | d        | 0.8947        | 80          |
| AP009552        | 2494260        | 2494298        | ISC1-1_MA        | 1338        | 1376        | d        | 0.8500        | 72          |
| AP009552        | 2667744        | 2667782        | ISC1-1_MA        | 1338        | 1376        | c        | 0.8500        | 72          |
| AP009552        | 2681387        | 2681425        | ISC1-1_MA        | 1338        | 1376        | c        | 0.8500        | 72          |
| <b>AP009552</b> | <b>2687565</b> | <b>2687842</b> | <b>ISC1-1_MA</b> | <b>1099</b> | <b>1376</b> | <b>c</b> | <b>0.9640</b> | <b>764</b>  |
| <b>AP009552</b> | <b>2688337</b> | <b>2689277</b> | <b>ISC1-1_MA</b> | <b>1</b>    | <b>941</b>  | <b>c</b> | <b>0.9447</b> | <b>2458</b> |
| AP009552        | 2942200        | 2942238        | ISC1-1_MA        | 1338        | 1376        | d        | 0.8500        | 72          |
| AP009552        | 2964062        | 2964100        | ISC1-1_MA        | 1338        | 1376        | c        | 0.8500        | 72          |
| AP009552        | 3181176        | 3181214        | ISC1-1_MA        | 1338        | 1376        | c        | 0.8750        | 78          |
| AP009552        | 3427549        | 3427587        | ISC1-1_MA        | 1338        | 1376        | c        | 0.8500        | 72          |
| AP009552        | 3443118        | 3443156        | ISC1-1_MA        | 1338        | 1376        | c        | 0.8500        | 72          |
| AP009552        | 3477923        | 3477961        | ISC1-1_MA        | 1338        | 1376        | d        | 0.8500        | 72          |
| AP009552        | 3709177        | 3709215        | ISC1-1_MA        | 1338        | 1376        | d        | 0.8500        | 72          |
| AP009552        | 3711190        | 3711228        | ISC1-1_MA        | 1338        | 1376        | d        | 0.8500        | 72          |
| AP009552        | 3834187        | 3834225        | ISC1-1_MA        | 1338        | 1376        | d        | 0.8500        | 72          |
| AP009552        | 3870195        | 3870233        | ISC1-1_MA        | 1338        | 1376        | c        | 0.8500        | 72          |
| AP009552        | 3906002        | 3906048        | ISC1-1_MA        | 1320        | 1376        | c        | 0.8800        | 84          |
| AP009552        | 3912540        | 3912578        | ISC1-1_MA        | 1338        | 1376        | d        | 0.8500        | 72          |
| AP009552        | 4164055        | 4164093        | ISC1-1_MA        | 1338        | 1376        | d        | 0.8500        | 72          |
| <b>AP009552</b> | <b>4504686</b> | <b>4506060</b> | <b>ISC1-1_MA</b> | <b>1</b>    | <b>1376</b> | <b>d</b> | <b>0.9884</b> | <b>4012</b> |
| AP009552        | 4574961        | 4575006        | ISC1-1_MA        | 1321        | 1376        | c        | 0.8776        | 82          |
| AP009552        | 4688372        | 4688410        | ISC1-1_MA        | 1338        | 1376        | c        | 0.8500        | 72          |
| AP009552        | 4693539        | 4693584        | ISC1-1_MA        | 1321        | 1376        | d        | 0.8776        | 82          |
| AP009552        | 4916791        | 4916829        | ISC1-1_MA        | 1338        | 1376        | d        | 0.8500        | 72          |
| AP009552        | 5031160        | 5031198        | ISC1-1_MA        | 1338        | 1376        | d        | 0.8500        | 72          |

|                 |                |                |                  |             |             |          |               |            |
|-----------------|----------------|----------------|------------------|-------------|-------------|----------|---------------|------------|
| AP009552        | 5230157        | 5230202        | ISC1-1_MA        | 1321        | 1376        | d        | 0.8776        | 82         |
| AP009552        | 5506665        | 5506711        | ISC1-1_MA        | 1320        | 1376        | c        | 0.8800        | 84         |
| <b>AP009552</b> | <b>5688487</b> | <b>5688736</b> | <b>ISC1-1_MA</b> | <b>1127</b> | <b>1376</b> | <b>c</b> | <b>0.9520</b> | <b>666</b> |
| <b>AP009552</b> | <b>5688737</b> | <b>5688928</b> | <b>ISC1-1_MA</b> | <b>1</b>    | <b>192</b>  | <b>c</b> | <b>0.9635</b> | <b>526</b> |
| AP009552        | 5800782        | 5800828        | ISC1-1_MA        | 1320        | 1376        | d        | 0.8800        | 84         |

## B) The ISC1-1\_MA and IS605B-1\_MA transposons have similar 3'-termini.

```
ISC1-1_MA          1321 1376
IS605B-1_MA       1280 1325   Identity = 88%

S: 1321 aaagccgacctccgctatcgctaaa-gggcggggtttcagaccattttttcgatga 1376
     |||||||-----||--|  |||  | ||||| | ||||| | ||||| | ||||| | |||||
Q: 1280 aaagccgc-----g-taaaacggcggtttcagaccatttttcgatga 1325
```

## C) ISC1-1\_MA

Microcystis aeruginosa NIES-843 DNA (complete genome)  
 Microcystis aeruginosa 9717 (WGS project CAII01000000)

```
Locus 1:
Q: AP009552          4504616 4506130
S: gi|389720214|emb|CAII01000056.1| 5228 5371

Q: CTATCTTTTGTAGTCGATCGAGGGGACAGGGATTATAATGCCCTTAGCCTAGCCTAGCAAGGGATAATT
   ||||||| | | | | | | | | | | | | | | | | | | | | | | | | | | | | | | | | | | | | |
S: CTATCTTTTGTAGTCGATCGAGGGGACAGGGATTATAATGCCCTTAGCCTAGCCTAGCAAGGGATAATT

Q: GTCACTAACCCCGCCCTAAAGCGACGGAGCTTGCTTAGACCAATTTAGGCGACGCAAGTAGAGACTACC
   -----
S: -----

Q: NNNNNNNNNNNNNNNNNNNNNNNNNNNNNNNNNNNNNNNNNNNNNNNNNNNNNNNNNNNNNNNNNNNNNN
   -----
S: -----

Q: TTAGCAAGATTCAGTTAATTCGTCTTAACGGTTTAATTGTCTTCGCTAACTTATATAAAGCCGCC
   -----
S: -----

Q: TCCGTTATCGCTAAAGGGCGGGTTTCAGACCCATTTTTTCAATGACCGGACTAAGTATCGATCGCCAGAA
   -----
S: -----ATGACCGGACTAAGTATCGATCGCCAGAA

Q: AAAAAAGCATAAACAGGGCCAACAAAAGCTGATAGTCCCCCGCT
   ||||||| | | | | | | | | | | | | | | | | | | | | | | | | | | | | | | | | | |
S: AAAAAAGCATAAACAGGGCCAACAAAAGCTGATAGTCCCCCGCT
```

## D)

Microcystis aeruginosa 9717 WGS project CAII01000000  
 Microcystis aeruginosa NIES-843 DNA, complete genome

```
gi|389715910|emb|CAII01000642.1| 12639 14010 ISC1-1_MA 1 1372 c 0.96
gi|389718374|emb|CAII01000290.1| 21575 22945 ISC1-1_MA 1 1372 c 0.96

Locus 1:
Q: 389715910 14080 12572
S: AP009552 2477064 2477200

Q: ATCTCGGAAAACAGACAATAAACAACGGCTTCTTTGTGTCTCAACAGCGAACACCAGCTATATCGTC
   ||||||| | | | | | | | | | | | | | | | | | | | | | | | | | | | | | | | | | | |
S: ATCTCGGAAAACAGACAATAAACAACGGCTTCTTTGTGTCTCAACAGCGAACATCAGCTATATC---
```



```

Q: ACTAACCCCGCCCTAAAAGGGACGGGGCTTGCCTAAACCAATTTAGGCGACGCAAGTAGAGACTACCGCA
S: -----

Q: NNNNNNNNNNNNNNNNNNNNNNNNNNNNNNNNNNNNNNNNNNNNNNNNNNNNNNNNNNNNNNNNNNN
S: -----

Q: GCAAGATTCAAGTTAATTCGTCGTTCTAACGGTTTAATTGTTTCTCACTAACTCATATAAAGCCGCCCTCC
S: -----

Q: GCTATCGCTAAAGGGCGGGTTTCAGACCCAGTTTTTCAATGAATAATTCTCAGAACCCAAACCCTGCGCG
S: -----ATGAATAATTCTCAGAACCCAAACCCTGCGCG

Q: GTCCCAACTACTGGAGTATTTCGTCGCGACAAGCTCATTG
|||:|||||
S: GTCCCAACTACTGGAGTATTTCGTCGCGACAAGCTCATTG

```

Locus 2:

```

Q: 389718374 23015 21505
S: AP009552 2390880 2391019

```

```

Q: GTAGCGATCGAGTTGCCAGCAGCCACCTCGCGACGTAAGATAACAGCAAACCTGTCCCGGATTTTCCTT
|||:|||||
S: GTAGCGATCGAGTTGCCAGCAGCCACCTTCGCGACCTAAGATAACAGCAAACCTGCCCGAGATTTTCCTT

Q: GTCACTAACCCCGCCCTAAAAGGGACGGGGCTTGCCTAGACCAATTTAGGCGACGCAAGTAGAGACTACC
S: -----

Q: NNNNNNNNNNNNNNNNNNNNNNNNNNNNNNNNNNNNNNNNNNNNNNNNNNNNNNNNNNNNNNNNNNN
S: -----

Q: TTAGTAAGATTCAAGTTAATTCGTCGTTCTAACGGTTTAATTGTTTCTCACTAACTTGTATAAAGCCGCC
S: -----

Q: TCCGTATTTCGCTAAAGGGCGGGTTTCAGACCCAGTTTTTCGATGATCAAATCCTTCTTCCTCCTC
|||:|||||
S: -----ATGAGTATCAAATCCTTCTTCCTCCTC

Q: CCTAGAACAAAACGACAAAACCTGCGCCACCAAAGGCGAT
|||:|||||
S: CCTGGAACAAAACGACAAAACCTGCGCCACCAAAGGCGAT
=====

```

**E)**  
**IS605B-1\_MA** transposon is inserted at the N|ATGA target sites.

S: Loci with inserted copies of *IS605B-1\_MA* are from the *Microcystis aeruginosa* NIES-843 DNA, complete genome;  
Q: Orthologous loci without the transposon insertions are from *Microcystis aeruginosa* 9717 WGS project CAII01000000.

Locus 1:

```

S: AP009552 497455 495991
Q: gi|389716044|emb|CAII01000622.1| 9241 9384

```

```

S: TTCTGGTTCCCGACAATCGGCCGGCAAAGAACAAGATCAAGATCAAGGAATCCCTACCGTTAAAGCTG
|||:|||||
Q: TTCTAGTTCCCGACAATCGGCCGGCAAAGAACAAGATCAAGATCAAGGAATCCCTACCGTTAAAGCTG

S: TTGACATCCTCACC GCCGTAACGACGGCGATTCCCAAACCTCACGATTTGAGTTTCTGCTTCTTTCC
S: -----
Q: -----

```







S: TGTTCTAATATTTAACAGTAAAGCCGTCGTAGAACGACGGGGTTTCAGACCCAAATTTTCGATGACCAAT  
-----|  
Q: -----ATGACCAAT  
  
S: TTTCTCAGATAGCGATCGCAGGGCGATCAGTGAGGGTTTGTACTAAAATGTCCA  
| | | | | : | | | | | : | | | | |  
Q: TTTCTCAGATAGCGATCGCAGGGCGATCAGTGAGGGTTTGTACTAAAATGTCCA

Locus 11:  
S: AP009552 3476567 3478031  
Q: gi|389715256|emb|CAI101000763.1| 157 14

S: CTGGATCCAGCAGCACCCCGCCGCCACAAATTTCTGCTGTGACAGGTTTCGGCAAGAGTCTCACGCTAGA  
| | | | | : | | | | | : | | | | |  
Q: CTGGATCCAGCAGTACCCCGCCGCCACAAATTGCTGCTGTGACAGGTTTCGGCAAGAGCCTCACGCTAGA  
  
S: TTGACATCCTCGCCCGCTAAAACGGACGGCGATTCCCAAACCTCACGATTGGGGTTCTGCTTCTTCC  
-----  
Q: -----  
  
S: NNNNNNNNNNNNNNNNNNNNNNNNNNNNNNNNNNNNNNNNNNNNNNNNNNNNNNNNNNNNNNNNNNNNNNN  
-----  
Q: -----  
  
S: TGTGCTAATATTTAACAGTAAAGCCGTCGTAGAACGACGGGGTTTCAGACCCAAATTTTCGATGACTAGG  
-----|  
Q: -----ATGACTAGG  
  
S: TATTTGATCCTAGATTCTCTGTTTCAGATCATAACCGAATCAGTGACCAAATCAGTTATCAGTAA  
| | | | | : | | | | | : | | | | |  
Q: TATTTGATACTAGATTCTCTGTTTCAGATCATAACCGAATCAGTGACCAAATCAGTTATCAGTAA

Locus 12:  
S: AP009552 4915435 4916893  
Q: gi|389718924|emb|CAI101000228.1| 3415 3278

S: TGGGGACGGAAAAATCCATTTTCGATGACCGCAACAGGCCCGGGCGCTTTGATAAAAAGTGAAAAAGTG  
| | | | | : | | | | | : | | | | |  
Q: TGGGGACGGAAAAATCCATTTTCGATGACCGCAACAGGCCCGGGCGCTTTGATAAAAAGTGAAAAAGTG  
  
S: TTGACATCCTCGCCCGCTAAAACGGACGGCGATTCCCAAACCTCACGATTGGGGTTCTGCTTCTTCC  
-----  
Q: -----  
  
S: NNNNNNNNNNNNNNNNNNNNNNNNNNNNNNNNNNNNNNNNNNNNNNNNNNNNNNNNNNNNNNNNNNNNNNN  
-----  
Q: -----  
  
S: TGTGCTAATATTTAACAGTAAAGCCGTCGTAGAACGACGGGGTTTCAGACCCAAATTTTCGATGAGGGAT  
-----|  
Q: -----ATGAGGGAT  
  
S: GATTAATTGTCAAGAAAAGCTAACATTAGTTGACCGAAAATTTGGGTACAAGCCCCGCC  
| | | | | : | | | | | : | | | | |  
Q: GATTAATTGTCAAGAAAAGCTAACATTAGTTGACCGAAAATTTGGGTACAAGCCCCGCC

=====

## Supplemental Figure 5.

### Identification of exact target sites and transposon's ends by pairwise alignments of concatenated sequences flanking transposon's copies with sequences of orthologous loci free of the transposon's insertions.

**A**, Two 140-bp concatenated sequences of 70-bp regions flanking each of two copies of *ISC2-1\_ML* in *Methanosarcina lacustris* Z-7289 (Archaea) are aligned with sequences of their orthologous loci found in *Methanosarcina* sp. *WWM596* and *Methanosarcina* sp. *WH1* genomes.

**B**, Six 280-bp concatenated sequences of 140-bp regions flanking each of six copies of *ISC2-1\_AF* in *Anoxybacillus flavithermus* TNO-09.006 (Proteobacteria) are aligned with sequences of their orthologous loci identified in different strains of *Anoxybacillus flavithermus*.

**C**, Two 280-bp concatenated sequences of 140-bp regions flanking each of two copies of *IS605B-1\_AF* in *Anoxybacillus flavithermus* TNO-09.006 are aligned with sequences of their orthologous loci identified in different strains of *Anoxybacillus flavithermus*. In all pairwise alignments, red arrows indicate positions of transposons inserted in the concatenated flanking sequences (queries); left and right dinucleotides of the GTGA target sites are in green and purple

#### A) Queries: concatenated 70-bp flanks of two *ISC2-1\_ML* copies in the *Methanosarcina lacustris* Z-7289 genome

##### Copy 1:

*Methanosarcina* sp. *WWM596*, complete genome

Sequence ID: [gb|CP009503.1](#) Length: 4137337 Number of Matches: 1

| Score                                                  | Expect  | Identities                                                      | Gaps | Strand | Frame   |
|--------------------------------------------------------|---------|-----------------------------------------------------------------|------|--------|---------|
| 161 bits(87) 2e-36( ) 126/144(88%) 5/144(3%) Plus/Plus |         |                                                                 |      |        |         |
| Query                                                  | 1       | GACAGGCTGCTGCTCGGCAGTGTGGCTGAAAAATGTTGTAAGGCACTGCAAGGTACCGGTA   |      |        | 60      |
| Sbjct                                                  | 2257167 | GACAGGCTGCTGCTCGGCAGCGTGGCAGAAAAAATCTCCGGCACTGCAAGGTGCCGGTA     |      |        | 2257226 |
| Query                                                  | 61      | ATGATTGTGAGTGTGAAAAATGCAGAACCTGAGGCAGAGAGCTCGAAAAATCACATTCAACC  |      |        | 116     |
| Sbjct                                                  | 2257227 | ATGATTGTAAAGTGAAGAGTGCAGAACCTGAGGCAGAAAGA-ATCGAAAAATCACATTCAACC |      |        | 2257285 |
| Query                                                  | 117     | TCAGGTTTTTATCTTCTGCACCTG                                        |      |        | 140     |
| Sbjct                                                  | 2257286 | TCAGGTTTTGATCTTCTGCATCTG                                        |      |        | 2257309 |

##### Copy 2:

*Methanosarcina* sp. *WH1*, complete genome

Sequence ID: [gb|CP009504.1](#) Length: 3914091 Number of Matches: 1

| Score                                                    | Expect | Identities                                                    | Gaps | Strand | Frame  |
|----------------------------------------------------------|--------|---------------------------------------------------------------|------|--------|--------|
| 202 bits(109) 1e-48( ) 133/144(92%) 4/144(2%) Plus/Minus |        |                                                               |      |        |        |
| Query                                                    | 1      | ACCGAAGCGTACCTCCGAATCGAAGGCTTCGGATTTCCGGGATATACTACCATTTCTTCC  |      |        | 60     |
| Sbjct                                                    | 974349 | ACCGAAGCGTACCTCCGGATCGAAGGCTTCGGATTTCCGGGATATAAACCATTTCTTCC   |      |        | 974290 |
| Query                                                    | 61     | GTAATAGGCAGTGTGAAACATCAAAAACTCTGGCAGAATAAAAACCCCGTTACTCTTAAGC |      |        | 116    |
| Sbjct                                                    | 974289 | GTAATAGGCAGTGTGAAACATCAAAAACTCTGGCAGAATAAAAACCCCTTTAATCTTAAGC |      |        | 974230 |
| Query                                                    | 117    | AAAGCTTCCAGTTACTTTGCTTAA                                      |      |        | 140    |
| Sbjct                                                    | 974229 | AAAGCTTCAAGTTACTTTGCATAA                                      |      |        | 974206 |

**B) Queries: concatenated 140-bp flanks of six *ISC2-1\_AF* copies in the *Anoxybacillus flavithermus TNO-09.006* genome**

**Copy1:**

Anoxybacillus flavithermus subsp. yunnanensis str. E13 Contig33, whole genome shotgun sequence  
Sequence ID: [gb|AVGH01000033.1](#) | Length: 311501

```

Query 1 TAGCCAAAGGAGAAGCTGTCCACCCGAAAGAAGGCGAAGAAGTGAAACGTAAGCCGGTGA 60
      |||
Sbjct 97885 TAGCCAAAGGAGAAGCGGTTTCATCCGAAAGAAGGCGAAGAAGTGAAACGCAAGCCGGTGA 97826

Query 61 AAAAAGCGGTGGAAGTCGGCCGAAATGATCCGTGCCCATGCGGAAGCGGAAAAAATATA 120
      |||
Sbjct 97825 AAAAAGCGGTGGAAGTCGGCCGAAATGATCCGTGCCCATGCGGAAGCGGAAAAAATATA 97766

Query 121 AACATTGTTGCGGACGATAAGTGAAGGGATATTCCTCGCTTTCGTTATGTTGCGTACGCC 176
      |||
Sbjct 97765 AACATTGTTGCGGACGATAAGTGAAGGGATGTTCCCTCGCTTTCGTTATGTTGCGTACGCC 97706

Query 177 GAGATGTTTACATACAATAATGGTTGAGGTGAAGGACATGATCGATTTAGTAGAAATTAA 236
      |||
Sbjct 97705 GAGACGTTTGCATACAATAATGGTTGAGGTGAAGGACATGATTGATTTAGTAGAAATTAA 97646

Query 237 GCAAGAGCTTGAAAAAATGGCTAAGCGATTAGTGGATATTAGGG 280
      |||
Sbjct 97645 GCAAGAGCTTGAAAAAATGGCTAAGCGATTAGCGGATATTAGGG 97602

```

**Copy2:**

Anoxybacillus flavithermus NBRC 109594 DNA, contig: 0021, whole genome shotgun sequence  
Sequence ID: [dbj|BARH01000021.1](#) | Length: 52818 Number of Matches: 1

| Score         | Expect   | Identities                                                   | Gaps      | Strand    | Frame |
|---------------|----------|--------------------------------------------------------------|-----------|-----------|-------|
| 477 bits(258) | 3e-131() | 276/284(97%)                                                 | 4/284(1%) | Plus/Plus |       |
| Query 1       |          | CGTCGAGAGTTTCCGCATGCTGAGCACTTATATATTGATAAAATGTATCGTGAAGTCGCA |           |           | 60    |
| Sbjct 33077   |          | CGTCGAGAGTTTCCGCATGCCGAGCACTTATATATTGATAAAATGTATCGTGAAGTCGCA |           |           | 33136 |
| Query 61      |          | GCAGCTCCGAAGCATCATATTGCGGTGCTGTTATTAAGTGCAAATATCGATGTACACGCA |           |           | 120   |
| Sbjct 33137   |          | GCAGCCCCGAAGCATCATATTGCGGTGCTGTTATTAAGTGCAAACATCGATGTACACGCA |           |           | 33196 |
| Query 121     |          | CAATATTTATAGAAAGTTGTGATCGTTGTGAAAGTTGTCTATATGTACACGCCATTAT   |           |           | 176   |
| Sbjct 33197   |          | CAATATTTATAGAAAGTTGTGATCGTTGTGAAAGTTGTCTATATGTACACGCCATTAT   |           |           | 33256 |
| Query 177     |          | GTGGAACATGTCAAGTGGCAAGTCGATGGTTGATGTACTTGAGCAGTTATTGCCATCTG  |           |           | 236   |
| Sbjct 33257   |          | GTGGAACATGTCAAGTGGCAAGTCGAATGGTTGATGTACTTGAGCAGTTATTGCCATCTG |           |           | 33316 |
| Query 237     |          | TTACATTTGAACGTCAAGATTTAAACTACGTGCCGACAAAGCG                  |           |           | 280   |
| Sbjct 33317   |          | TTACATTTGAACGTCAAGATTTAAACTACGTGCCGACAAAGCG                  |           |           | 33360 |

### Copy3:

Anoxybacillus flavithermus NBRC 109594 DNA, contig: 0021, whole genome shotgun sequence  
Sequence ID: [dbj|BARH01000021.1](#) Length: 52818 Number of Matches: 1

|       | Score         | Expect   | Identities                                                  | Gaps      | Strand    | Frame |
|-------|---------------|----------|-------------------------------------------------------------|-----------|-----------|-------|
|       | 472 bits(255) | 2e-129() | 275/284(97%)                                                | 4/284(1%) | Plus/Plus |       |
| Query | 1             |          | TCATACGCCAATCAACATCATTGCGAAAAACGTGAGGCAGCGCAAGCACTAATGAAGC  |           |           | 60    |
|       |               |          |                                                             |           |           |       |
| Sbjct | 31532         |          | TCATACGCCAATCAACATCATTGCGAAAAAGCGTGAGGCAGCGCAAGCACTAATGAAGC |           |           | 31591 |
| Query | 61            |          | TGAACGATATGTTGTGTAATAATGGAAGTACCAGACGCATCGTCTGGTACTTTCTGTTT |           |           | 120   |
|       |               |          |                                                             |           |           |       |
| Sbjct | 31592         |          | TGAACGATATGTTGTGTAATAATGGAAGTACCAGACGCATCGTCTGGTACTTTCTCTTT |           |           | 31651 |
| Query | 121           |          | TTATATTGTGTATAGATGAGGTGAGAAGATGGTAACATTTTATTGGTATCCAAAGTGC  |           |           | 176   |
|       |               |          |                                                             |           |           |       |
| Sbjct | 31652         |          | TTATATTGTGCATAGATGAGGTGAGAAGATGGTAACATTTTATTGGTATCCAAATGC   |           |           | 31711 |
| Query | 177           |          | CACATGTCGCAAAGCAAAAAATGGCTAGATGACAACAACATTTCTGTGCAAGCGATA   |           |           | 236   |
|       |               |          |                                                             |           |           |       |
| Sbjct | 31712         |          | CACATGTCGCAAAGCAAAAAATGGCTAGATGACAACAACATTTCTGTGCAAGCGATA   |           |           | 31771 |
| Query | 237           |          | TATTGTTGAGCAGCCTCCGTCAAAAGAGCAGTTGCGGACGTTAT                | 280       |           |       |
|       |               |          |                                                             |           |           |       |
| Sbjct | 31772         |          | TATTGTTGAACAGCCTCCGTCAAAAGAGCAGTTGCGGACGTTAT                | 31815     |           |       |

### Copy4:

Anoxybacillus flavithermus AK1 seq\_num\_004, whole genome shotgun sequence  
Sequence ID: [gb|APCD01000004.1](#) Length: 184270 Number of Matches: 2

|       | Score         | Expect  | Identities                                                   | Gaps      | Strand    | Frame |
|-------|---------------|---------|--------------------------------------------------------------|-----------|-----------|-------|
|       | 259 bits(140) | 1e-65() | 158/166(95%)                                                 | 4/166(2%) | Plus/Plus |       |
| Query | 119           |         | GTGACGGGCGTTATATGGAAAGTGAACCGTTTTCGCTATATATACCAGAGCGCATGAGG  |           |           | 174   |
|       |               |         |                                                              |           |           |       |
| Sbjct | 13902         |         | GTGACGGGCGATTATATGGAAAGTGAACCGTTTTCGCTATATATACCAGGGCGCATGAGG |           |           | 13961 |
| Query | 175           |         | GAAAAGGGGAATCCCAAACCGTTCGCTTAACGCGAGCGTGGTTGGGATGATGTATA     |           |           | 234   |
|       |               |         |                                                              |           |           |       |
| Sbjct | 13962         |         | GAAAAGGGGAATCCCAAACCGTTCGCTTAACGCGAGCGTGGTTGGGATGATGTATA     |           |           | 14021 |
| Query | 235           |         | ATTAAAAATCAAAGTTATCTGGATCTGGACCGATGCGGCGGTTTTC               | 280       |           |       |
|       |               |         |                                                              |           |           |       |
| Sbjct | 14022         |         | ATTAAAAATCAAAGTTATCTGGATCTGGACCGATGCGGCGGTTTTC               | 14067     |           |       |

### Copy5:

Anoxybacillus flavithermus AK1 seq\_num\_001, whole genome shotgun sequence  
Sequence ID: [gb|APCD01000001.1](#) Length: 336904 Number of Matches: 1

|       | Score         | Expect   | Identities                                                    | Gaps      | Strand     | Frame  |
|-------|---------------|----------|---------------------------------------------------------------|-----------|------------|--------|
|       | 388 bits(210) | 2e-104() | 245/261(94%)                                                  | 5/261(1%) | Plus/Minus |        |
| Query | 25            |          | TATCTTGTCACTGTTCTGACAAATATGCACGTCCTTGCATTTCTAATATCAAATA-GATA  |           |            | 83     |
|       |               |          |                                                               |           |            |        |
| Sbjct | 173278        |          | TATCTTGTCACTGTTCTGACAAATATGCACGTCCTTGCATTTCTAATATCAAATAAGATA  |           |            | 173219 |
| Query | 84            |          | GTATATACGATATAAGGTATAACAAGGAGGTGGAAAAATGGCAAAGTACAAATTAAAGTG  |           |            | 140    |
|       |               |          |                                                               |           |            |        |
| Sbjct | 173218        |          | GTATATACGATATAAGGTATAACAAGGAGGTGGAAAAATGACGAAAGTACAAATTAAAGTG |           |            | 173159 |
| Query | 141           |          | ATGGATAATGGTTCATTTTCGTGTAACCGCGATGTCGAATTAATTGACATGGAAGGAAAC  |           |            | 199    |
|       |               |          |                                                               |           |            |        |
| Sbjct | 173158        |          | ATGGATAATGGTTCATTTTCGTGTAACCGCGATGTCGAATTAATTGACATGGAAGGAAAC  |           |            | 173099 |
| Query | 200           |          | AAGTTCGAAACAAAAGAAACGTTTTCTCTCTGTCGTTGCGGGCTCTCACAAAACATGCCG  |           |            | 259    |
|       |               |          |                                                               |           |            |        |
| Sbjct | 173098        |          | AAGTTTGAACAAAAGAAACGTTTTCTCTCTGTCGTTGCGGGCTCTCACAAAACATGCCG   |           |            | 173039 |
| Query | 260           |          | TTTGTGATGCAGCCCATAAA                                          | 280       |            |        |
|       |               |          |                                                               |           |            |        |
| Sbjct | 173038        |          | TTTGTGATGCAGCCCATAAA                                          | 173018    |            |        |



Copy6:

Anoxybacillus flavithermus NBRC 109594 DNA, contig: 0009, whole genome shotgun sequence  
Sequence ID: [dbj|BARH01000009.1](#) Length: 172593 Number of Matches: 1

| Score         | Expect   | Identities                                                    | Gaps      | Strand    | Frame  |
|---------------|----------|---------------------------------------------------------------|-----------|-----------|--------|
| 488 bits(264) | 2e-134() | 278/284(98%)                                                  | 4/284(1%) | Plus/Plus |        |
| Features:     |          |                                                               |           |           |        |
| Query         | 1        | AAACGAACCGATTGAACAAAAACGCATTCGTCAGCTTATCaaaaaaaaTCAAGCATATAA  |           |           | 60     |
| Sbjct         | 146430   | AAACGAACCGATTGAACAAAAACGCATTCGTCAGCTTATCAAAAAAATCAAGCATATAA   |           |           | 146489 |
| Query         | 61       | CGAATGGCTGATGGCGCATCCACGCTATGAGACAGTCATCATTCCGATCGGTGACGGAAT  |           |           | 120    |
| Sbjct         | 146490   | CGAATGGCTGATGGCGCATCCACGTTATGAGACAGTCATCATTCCGATCGGTGACGGAAT  |           |           | 146549 |
| Query         | 121      | GGCGATATCGAGAAAAACGAGGTGAATAGAATGAAAAACCAGAATTGCTTGTACGCCAA   |           |           | 176    |
| Sbjct         | 146550   | GGCGATATCGAGAAAAACGAGGTGAATAGAATGAAAAACCAGAATTGCTTGTACGCCAA   |           |           | 146609 |
| Query         | 177      | CGAGCGTGGCGCATATTGAACAACCTCGCACAAAGCAGGAGCGAATGCTGTCATATTGGTG |           |           | 236    |
| Sbjct         | 146610   | CGAGCGTGGCGCATATTGAACAACCTCGCACAAAGCAGGAGCGAATGCCGTCATATTGGTG |           |           | 146669 |
| Query         | 237      | AACAACGGTACGGCTTGCCTTTAGCAGGTGAGTTTTACGTC                     |           |           | 280    |
| Sbjct         | 146670   | AACAACGGTACGGCTTGCCTTTAGCAGGTGAGTTTTACGTC                     |           |           | 146713 |

=====

C) Queries: concatenated 140-bp flanks of two *IS605B-1\_AF* copies in the *Anoxybacillus flavithermus TNO-09.006* genome

Copy1:

Anoxybacillus flavithermus AK1 seq\_num\_018, whole genome shotgun sequence  
Sequence ID: [gb|APCD01000018.1](#) Length: 51524 Number of Matches: 1

| Score         | Expect   | Identities                                                    | Gaps      | Strand     | Frame |
|---------------|----------|---------------------------------------------------------------|-----------|------------|-------|
| 483 bits(261) | 2e-132() | 277/284(98%)                                                  | 4/284(1%) | Plus/Minus |       |
| Query         | 1        | ATTAAAATGACGTTTGCTTTTCTTTTGCTAAGTGAAAAGCAACAGAGGAGCCAACAATT   |           |            | 60    |
| Sbjct         | 48080    | ATTAAAATGACGTTTGCTTTTCTTTTGCTAAGTGAAAAGCAACAGAGGAGCCAACAATT   |           |            | 48021 |
| Query         | 61       | CCACCGCCAATGACGATATAACGATTTCATCGTTTACACCTTTCCTTTTCGTGATACTGTA |           |            | 120   |
| Sbjct         | 48020    | CCACCGCCAATGACGATATAACGATTTCATCGTTTACACCTTTCCTTTTCGTGATACTGTA |           |            | 47961 |
| Query         | 121      | TCATTACGATAACATAGGACGTGAAAAAAGCAAGGGTCTTCCCTTGCCTTTAAATAAAAC  |           |            | 176   |
| Sbjct         | 47960    | TCATTACGATAACATAGGACATGAAAAAAGCAAGGGTCTTCCCTTGCCTTTAAATAAAAC  |           |            | 47901 |
| Query         | 177      | CATTTTGCCATTTTATAATATAATGGCATGCCGATTGTTAAGTTAAATGGGAAGGTGAGC  |           |            | 236   |
| Sbjct         | 47900    | CATTTTGCCATTTTATAATATAAAGGCATGCCGATTGTTAAGTTAAATGGGAAGGTGAGC  |           |            | 47841 |
| Query         | 237      | CCGAGCGCCATGCCGAGATAAATAGCAGGTTTGCTTCTGGAAC                   |           |            | 280   |
| Sbjct         | 47840    | CCGAGCGCCATGCCGAGATAAATAGCAGGTTTGCTTCTGGAAC                   |           |            | 47797 |

Copy2:

Anoxybacillus flavithermus WK1, complete genome

Sequence ID: [gb|CP000922.1](#)|Length: 2846746|Number of Matches: 1

| Score | Expect | Identities | Gaps | Strand | Frame |
|-------|--------|------------|------|--------|-------|
|-------|--------|------------|------|--------|-------|

466 bits(252) 2e-128() 274/284(96%) 4/284(1%) Plus/Minus

|       |         |                                                              |         |  |         |
|-------|---------|--------------------------------------------------------------|---------|--|---------|
| Query | 1       | CGTCGAGAGTTTCCGCATGCTGAGCACTTATATATTGATAAAATGTATCGTGAAGTCGCA |         |  | 60      |
|       |         |                                                              |         |  |         |
| Sbjct | 2450942 | CGTCGAGAGTTTCCGCATGCCGAGCACTTGTATATTGATAAAATGTATCGTGAAGTGGCA |         |  | 2450883 |
| Query | 61      | GCAGCTCCGAAGCATCATATTGCGGTCGTGTTATTAAGTGCAAATATCGATGTACACGCA |         |  | 120     |
|       |         |                                                              |         |  |         |
| Sbjct | 2450882 | GCAGCCCCGAAGCATCATATTGCGGTCGTGTTATTAAGTGCAAACATCGATGTACACGCA |         |  | 2450823 |
| Query | 121     | CAATATTTATAGAAAGTTGTGTATCGTTGTGAAAGTTGTCTATATGTACACGCCATTAT  |         |  | 176     |
|       |         |                                                              |         |  |         |
| Sbjct | 2450822 | CAATATTTATAGAAAGTTGTGTATCGTTGTGAAAGTTGTCTATATGTACACGCCATTAT  |         |  | 2450763 |
| Query | 177     | GTGGAACATGTCAAGTGGCAAGTCGTATGGTTGATGTACTTGAGCAGTTATTGCCATCTG |         |  | 236     |
|       |         |                                                              |         |  |         |
| Sbjct | 2450762 | GTGGAACATGTCAAGTGGCAAGTCGAATGGTTGATGTACTTGAGCAGTTATTGCCATCTG |         |  | 2450703 |
| Query | 237     | TTACATTTGAACGTCAAGATTTAAACTACGTGCCGGACAAAGCG                 | 280     |  |         |
|       |         |                                                              |         |  |         |
| Sbjct | 2450702 | TTACATTTGAACGTCAAGATTTAAACTACGTGCCGGACAAAGCG                 | 2450659 |  |         |















**Supplemental Figure 7.** Phylogenetic tree of IscA and TnpA Y1 transposases (Figure 5 in the main text) in the Newick format.

```
(IS6051_HP:0.49198042,IS6051_FP:0.13809583,(((IS6051_BSp:0.06225530,IS6051_EH:0.15633384)1.000000:0.45066912,(ISC2Y1_CS:0.57003179,ISC2Y1_EC:0.34822821)0.985870:0.15712019)0.999967:0.25729340,(((IS6051_MM:0.27944804,IS6051_MZ:0.37157052)0.999982:0.25286451,((IS6051_VB:0.91205125,ISC2Y1_KR:0.58815167)0.615112:0.10188805,(IS6051_BC:0.38657671,IS6051_RI:0.61253716)0.598364:0.08737726)0.975325:0.10002596)0.999975:0.17520367,(IS6051_BMT2:0.37145949,(ISC2Y1_AA:0.27958692,(ISC2Y1_CH:0.24760373,ISC2Y1_MA:0.34666893)0.489115:0.05390627)0.797239:0.05027554)0.391616:0.02395123)0.994942:0.16202732)1.000000:0.32875794);
```

## Supplementary Figure 8. IscB tree in Newick format.

The tree was reconstructed by FastTree program (“-gamma -wag” options). A multiple alignment of IscB sequences was filtered with homogeneity threshold of 0.5 and gap occurrence threshold of 0.5, prior to tree reconstruction. This tree is schematically shown in Figure 6.

```
(( (495188212_Ktedonobacter_racemifer:0.19300, ((495179135_Ktedonobacter_racemifer:0.12942, (495180525_Ktedonobacter_racemifer:0.08376, ((495182844_Ktedonobacter_racemifer:0.04845, (495186450_Ktedonobacter_racemifer:0.03647, (495182297_Ktedonobacter_racemifer:0.03740, 297550215_Ktedonobacter_racemifer_ISC2_1_KR:0.02308)0.755:0.01382)0.879:0.00016)0.870:0.01068, (297550437_Ktedonobacter_racemifer_DSM_44963:0.03114, 495179751_Ktedonobacter_racemifer:0.08685)0.593:0.00015)0.762:0.00601, (495185167_Ktedonobacter_racemifer:0.02509, 495198645_Ktedonobacter_racemifer:0.07922)0.852:0.01641)0.753:0.00932)0.948:0.04370)0.610:0.00346, (495180193_Ktedonobacter_racemifer_ISC2-2_KR:0.10813, 495179835_Ktedonobacter_racemifer:0.11304)0.752:0.04938)0.755:0.03002)0.806:0.02684, (497835978_SAR324_cluster_bacterium_JCVI_SC_AAA005:0.24021, (((889959964_Scytonema_tolypothrichoides:0.09715, ((516355684_Scytonema_hofmanni:0.06903, 516352019_Scytonema_hofmanni:0.04646)0.949:0.03444, ((499309054_Nostoc_sp_PCC_7120:0.02422, 499635620_Anabaena_variabilis:0.06516)0.970:0.05181, ((652319815_Fischerella_sp_PCC_9431:0.01562, (652324245_Fischerella_sp_PCC_9431:0.03503, 515883076_Stigonematales:0.00523)0.873:0.01260)0.293:0.00560, ((657929237_Scytonema_hofmanni_UTEX_B_1581:0.05748, 504893952_Anabaena_sp_90:0.02890)0.805:0.01185, ((515519056_Anabaena_sp_PCC_7108:0.05269, (654617757_Dolichospermum_circinale:0.06352, 505030549_Anabaena_cylindrica:0.01798)0.648:0.02666)0.500:0.01269, (499636046_Anabaena_variabilis:0.07563, (657931854_Scytonema_hofmanni_UTEX_B_1581:0.02794, 657932534_Scytonema_hofmanni_UTEX_B_1581:0.02196)0.904:0.02067)0.587:0.00015)0.916:0.02047)0.838:0.01257, 657932541_Scytonema_hofmanni_UTEX_B_1581:0.06562)0.776:0.00714)0.459:0.00711, (748134943_Scytonema_millei:0.06170, 505023946_Cylindrospermum_stagnale:0.07076)0.459:0.01077)0.643:0.01847)0.740:0.00891, (518327680_Calothrix_sp_PCC_7103:0.06344, (518326274_Calothrix_sp_PCC_7103:0.02512, 518324846_Calothrix_sp_PCC_7103:0.04734)0.963:0.04578)0.856:0.02462)0.883:0.01911)0.828:0.01381)0.946:0.03608, (503088871_Cyanothece_sp_PCC_7822:0.10915, 196179674_Coleofasciculus_chthonoplastes_PCC_7420:0.08667)0.448:0.01983)0.908:0.02787, (648407024_Oscillatoria_sp_PCC_10802:0.07550, (78499555_Arthrospira_platensis:0.16053, 528102090_Salipiger_mucosus_DSM_16094_ISC2_1_SM:0.12324)0.685:0.00885)0.898:0.02360)0.706:0.00527)0.819:0.01501)0.697:0.00462, (((669952828_Acidithiobacillus_ferrovirans:0.10571, ((501355452_Acidithiobacillus_caldus:0.02501, 339834277_Acidithiobacillus_sp_GGI_221:0.04500)0.954:0.06206, (521982550_Verrucomicrobium_sp_3C:0.06033, 517100807_Verrucomicrobium_sp_3C:0.03902)0.911:0.04201)0.129:0.02369)0.969:0.06654, (501164377_Petrogona_mobilis:0.15158, 749573752_Geoalkalibacter_subterraneus:0.06351)0.847:0.03228)0.775:0.02862, (((((502796854_Nitrosococcus_halophilus:0.04511, (299540414_Nitrosococcus_watsonii_C_113:0.04757, 291580488_Nitrosococcus_halophilus_Nc_4_ISC2_1_NH:0.03642)0.734:0.00654)0.572:0.01306, 502797006_Nitrosococcus_halophilus:0.05095)1.000:0.10210, (738341074_Methylobacter_whittenburyi:0.13739, (723287658_Candidatus_Thiomargarita_nelsonii:0.02771, 723288870_Candidatus_Thiomargarita_nelsonii:0.02492)0.966:0.06371)0.723:0.03113)0.000:0.00014, (723284236_Candidatus_Thiomargarita_nelsonii:0.02476, 723282587_Candidatus_Thiomargarita_nelsonii:0.02241)0.999:0.09617)0.757:0.00695, (764393758_Raoultella_ornithinolytica:0.18169, (502796490_Nitrosococcus_halophilus:0.15357, 749573854_Geoalkalibacter_subterraneus:0.06735)0.865:0.03459)0.187:0.01848)0.747:0.00768)0.897:0.02924, (((491573834_Sutterella_wadsworthensis:0.16265, (495179088_Ktedonobacter_racemifer:0.03750, 495193778_Ktedonobacter_racemifer:0.11288)1.000:0.20018, (((((750554050_Streptomyces_acidiscabies:0.05151, (503945237_Streptomyces_bingchenggensis:0.09643, 916325889_Nocardiopsis_gilva:0.10456)0.601:0.01145)0.861:0.02015, (296847451_Nocardiopsis_dassonvillei_DSM_43111:0.16249, (516143664_Nocardiopsis_kunsanensis:0.08561, ((516144719_Nocardiopsis_kunsanensis:0.12550, 516166536_Nocardiopsis_ganjiahuensis:0.06269)0.700:0.01734, 516184175_Nocardiopsis_lucentensis:0.10244)0.768:0.01923)0.922:0.02785, 736504009_Actinomadura_rifamycini:0.14695)0.773:0.01649)0.947:0.03544)0.780:0.02095, 703021414_Actinomadura_madurae:0.13264)0.628:0.00394, (270508069_Streptosporangium_roseum_DS_M_43021:0.06926, (502652377_Streptosporangium_roseum:0.05196, 664394896_Streptosporangium_amethys_togenes:0.04746)0.466:0.01455)0.721:0.01375)0.929:0.04116, (491458270_Streptomyces_pristinaespiralis:0.12817, (702616456_Streptomyces_virginiae:0.24876, (((759742382_Streptomyces_fulvoviolaceus:0.02252, (759990428_Streptomyces_xylophagus:0.04084, (517887110_Streptomyces_prunicolor:0.02712, 917194967_Streptomyces_sp_NRRL_F_525:0.05729)0.462:0.01789)0.886:0.02391)0.947:0.02982, 807125388_Streptomyces_sp_WM6386:0.03576)0.383:0.00538, 917219793_Streptomyces_violaceoruber:0.07968)0.887:0.02041, (490089111_Streptomyces_viridochromogenes:0.13695, (916576584_Streptomyces_sp_HGB0020:0.00015, 512057519_Streptomyces_sp_HGB0020:0.00598)0.953:0.04596)0.568:0.01243)0.284:0.03157)0.847:0.03655)0.994:0.10918)0.352:0.02096, (665859048_Streptomyces_roseochromogenus:0.10395, 740584636
```

\_\_Brachy bacterium phenoliresistens:0.39366)0.641:0.02165)0.991:0.11786)0.252:0.02931)0.706:0.0113  
1,(((494100423\_\_Thiorhodococcus drevsii:0.08545,(530927885\_\_Leptospirillum\_sp\_Group\_IV\_UBA\_BS:0.  
03581,530927150\_\_Leptospirillum\_sp\_Group\_IV\_UBA\_BS:0.05891)0.891:0.02889)0.329:0.00684,(754583666  
\_\_Pyrinomonas\_methylaliphatogenes:0.14457,(297556095\_\_Ktedonobacter\_racemifer\_DSM\_44963:0.15604,4  
95192221\_\_Ktedonobacter\_racemifer:0.12649)0.915:0.07783)0.942:0.06362)0.353:0.01604,(((73761298  
5\_\_Halomonas\_sp\_TG39a:0.05135,359298001\_\_Halomonas\_sp\_GFAJ\_1:0.04594)0.755:0.00015,(648414493\_\_Ha  
lomonas\_jeotgali:0.01434,749554550\_\_Halomonas\_salina:0.07022)0.598:0.01224)0.927:0.04954,(6559581  
59\_\_Azohydromonas\_australica:0.13995,500125461\_\_Polaromonas\_naphthalenivorans:0.11724)0.908:0.059  
46)0.812:0.02518,(((349789229\_\_Thiorhodospira\_sibirica\_ATCC\_700588:0.08588,(502735286\_\_Allochro  
m\_atium\_vinosum:0.04782,502734885\_\_Allochro\_m\_atium\_vinosum:0.02800)0.925:0.03115)0.911:0.02971,((655  
196732\_\_Pseudomonas\_sp\_Ant30\_3:0.10901,520868253\_\_Pseudomonas\_stutzeri:0.02742)0.915:0.04224,5171  
00800\_\_Verrucomicrobium\_sp\_3C:0.08870)0.332:0.00794)0.720:0.00752,((917378057\_\_Acidithiobacillus\_  
ferrivorans:0.02404,(517101236\_\_Verrucomicrobium\_sp\_3C:0.07447,496349795\_\_Methylacidiphilum\_fumar  
iolicum:0.20348)0.651:0.00492)0.887:0.01726,(740252799\_\_Thiobacillus\_prosperus:0.09694,347587148\_  
\_\_Chloracidobacterium\_thermophilum\_B:0.03768)0.914:0.02952)0.707:0.00211)0.892:0.01632,((740686785  
\_\_Acidithiobacillus\_caldus:0.02500,(501633885\_\_Acidithiobacillus\_ferrooxidans:0.02802,(503796304\_  
\_\_Acidithiobacillus\_ferrivorans:0.03548,503796369\_\_Acidithiobacillus\_ferrivorans:0.03715)0.980:0.0  
4604)0.942:0.03414)0.913:0.02808,((501634530\_\_Acidithiobacillus\_ferrooxidans:0.04946,737207500\_\_A  
cidithiobacillus\_ferrivorans:0.05198)0.744:0.00704,669953820\_\_Acidithiobacillus\_ferrivorans:0.023  
60)0.745:0.00656)0.750:0.00574)0.745:0.00972)0.735:0.01389,((764526366\_\_Thioalkalimicrobium\_micr  
o\_aerophilum:0.08737,(636809000\_\_Desulfotignum\_balticum:0.00595,474489591\_\_Desulfotignum\_phosphito  
xidans\_DSM\_13687:0.01090)1.000:0.15546)0.964:0.07616,(738340993\_\_Methylobacter\_whittenburyi:0.105  
13,(780103597\_\_Thioploca\_ingrica:0.05262,780112544\_\_Thioploca\_ingrica:0.03888)0.979:0.06462)0.113  
:0.03599)0.761:0.00815,(120593573\_\_Polaromonas\_naphthalenivorans\_CJ2:0.09002,((736413103\_\_Candid  
atus\_Contendobacter\_odensis:0.05139,577004633\_\_Candidatus\_Contendobacter\_odensis\_Run\_B\_J11:0.0524  
9)0.954:0.04665,((915471230\_\_Burkholderia\_ambifaria:0.08661,(120596178\_\_Polaromonas\_naphthaleniv  
orans\_CJ2:0.02554,500122049\_\_Polaromonas\_naphthalenivorans:0.05426)0.962:0.05709)0.431:0.03673,(8  
36700638\_\_Burkholderia\_glathei:0.05625,((759564206\_\_Burkholderia\_oxyphila:0.05947,(494852515\_\_Bu  
rkholderia\_terrae:0.05714,389936164\_\_Burkholderia\_terrae\_BS001:0.07206)0.819:0.01586)0.757:0.0068  
3,(916987011\_\_Achromobacter\_sp\_DH1f:0.06995,(759564135\_\_Burkholderia\_oxyphila:0.03177,(654753328\_  
\_\_Burkholderia\_nodosa:0.05589,494862862\_\_Burkholderia\_terrae:0.06058)0.716:0.00531)0.975:0.04460)0.  
.766:0.00742)0.809:0.01166,((495010668\_\_Burkholderia\_sp\_BT03:0.09431,(829809554\_\_Diaphorobacter\_s  
p\_J5\_51:0.09573,499805501\_\_Polaromonas\_sp\_JS666:0.05557)0.870:0.02270)0.771:0.01149,(737978609\_\_B  
urkholderia\_glathei:0.05818,654777069\_\_Burkholderia\_mimosarum:0.04981)0.734:0.01138)0.347:0.00993  
)0.926:0.02949)0.353:0.01539)0.218:0.01184,((737839666\_\_Cupriavidus\_basilensis:0.00014,771679752\_  
\_\_Burkholderiaceae\_bacterium\_16:0.05020)0.941:0.02654,(517126235\_\_Cupriavidus\_sp\_UYPR2512:0.04303,  
(549495638\_\_Ralstonia\_pickettii:0.03072,(757645062\_\_Cupriavidus\_necator:0.02992,549628277\_\_Ralsto  
nia\_pickettii:0.03286)0.000:0.00015)0.876:0.01830)0.902:0.02760)0.968:0.05179)0.782:0.01572)0.776  
:0.00959,(821562027\_\_Microvirga\_sp\_JC119:0.09347,(494590156\_\_Marinobacter\_sp\_ELB17:0.09840,126627  
116\_\_Marinobacter\_sp\_ELB17\_ISC2\_1\_MS:0.05305)0.891:0.03259)0.885:0.02648)0.366:0.00642)0.786:0.0  
1451)0.776:0.01268)0.388:0.00711)0.636:0.03759,(251770992\_\_Leptospirillum\_ferrodiazotrophum:0.021  
70,(251773297\_\_Leptospirillum\_ferrodiazotrophum:0.04094,251771591\_\_Leptospirillum\_ferrodiazotroph  
um:0.00016)0.870:0.01444)0.957:0.06384)0.290:0.01704)0.894:0.02725,((433293862\_\_Thermoanaerobact  
erium\_thermosaccharolyticum\_M0795:0.10565,((701166555\_\_Fervidobacterium\_islandicum:0.08075,502569  
059\_\_Ammonifex\_degensii:0.19584)0.013:0.02051,656263327\_\_euryarchaeote\_SCGC\_AAA261\_G15:0.15424)0.  
520:0.02606,((754582141\_\_Pyrinomonas\_methylaliphatogenes:0.11866,(651374235\_\_Caldanaerobius\_polys  
accharolyticus:0.12222,917662534\_\_Thermincola\_ferriacetica:0.08919)0.840:0.02360)0.313:0.01566,50  
3547932\_\_Mahella\_australiensis:0.12433)0.743:0.01114)0.927:0.05092)0.369:0.02768,(((490173387\_  
\_\_Desulfobacter\_postgatei:0.04304,490176289\_\_Desulfobacter\_postgatei:0.08287)0.999:0.35182,(297555  
359\_\_Ktedonobacter\_racemifer\_DSM\_44963:0.44055,((433669275\_\_Halobacteroides\_halobius\_DSM\_5150\_\_IS  
C2\_1\_HH:0.06936,(505140419\_\_Halobacteroides\_halobius:0.12016,503042356\_\_Acetohalobium\_arabaticum:  
0.16290)0.295:0.03019)0.901:0.11265,(736253160\_\_Bacillus\_sp\_FJAT\_14578:0.19812,((738422043\_\_Mitsu  
okella\_jalaludinii:0.03467,739503114\_\_Selenomonas\_ruminantium:0.02171)1.000:0.23378,(746610513\_\_C  
lostridium\_argentinense:0.15539,(518905354\_\_Bacillus\_sp\_123MFChir2:0.09643,518907476\_\_Bacillus\_sp\_  
123MFChir2:0.06101)1.000:0.20001)0.249:0.07323)0.478:0.10686)0.926:0.15129)0.997:0.32110)0.962:0.  
.20729)0.858:0.08748,((297547772\_\_Ktedonobacter\_racemifer\_DSM\_44963\_\_ISC1\_1\_KR:0.61106,(((495462  
462\_\_Moorea\_producens:0.08895,332353334\_\_Moorea\_producens\_3L:0.12177)0.803:0.04869,(518337458\_\_Pl  
eurocapsa\_sp\_PCC\_7319:0.23997,(504963642\_\_Oscillatoria\_acuminata:0.20902,(428250446\_\_Microcoleus  
sp\_PCC\_7113:0.13757,(515887458\_\_Mastigocladopsis\_repens:0.07790,515389462\_\_Chlorogloeopsis\_fritsc  
hii:0.02948)0.978:0.09834)0.738:0.03169)0.708:0.02819)0.950:0.08595)0.700:0.02087,(((196176410\_\_  
Coleofasciculus\_chthonoplastes\_PCC\_7420:0.01285,196182912\_\_Coleofasciculus\_chthonoplastes\_PCC\_742  
0:0.01350)0.679:0.00356,(196183095\_\_Coleofasciculus\_chthonoplastes\_PCC\_7420\_\_ISC1\_2\_CC:0.02180,49

3031181\_Coleofasciculus\_chthonoplastes:0.00865)0.952:0.02845)0.968:0.04382,(((196187591\_\_Synechococcus\_sp\_PCC\_7335:0.14953,(515872123\_\_Spirulina\_subsalsae:0.02800,(504963785\_\_Oscillatoria\_acuminata:0.04742,(703193438\_\_Spirulina\_subsalsae:0.03831,504040543\_\_Arthrospira\_platensis:0.01570)0.798:0.01594)0.760:0.01075)0.887:0.03206)0.914:0.04387,(((505037351\_\_Halotheca\_sp\_PCC\_7418:0.10698,(493504336\_\_Synechococcus\_sp\_PCC\_7335:0.16283,(915593086\_\_Acaryochloris\_sp\_CCME5\_5410:0.04123,657199754\_\_Acaryochloris\_sp\_CCME5\_5410:0.04022)0.991:0.12254)0.871:0.03956)0.966:0.07929,(648408069\_\_Prochlorothrix\_hollandica:0.05137,(738948126\_\_Planktothrix:0.04828,(17135565\_\_Nostoc\_sp\_PCC\_7120:0.00885,764953316\_\_Nostoc\_sp\_PCC\_7120:0.00014)0.946:0.05715)0.904:0.04037)0.911:0.03855)0.853:0.03209,(((166086237\_\_Microcystis\_aeruginosa\_NIES\_843\_ISC1\_1\_MA:0.03885,(((505016981\_\_Crinalium\_episammum:0.06693,493574625\_\_Gloeocapsa\_sp\_PCC\_73106:0.02792)0.735:0.00520,(493576687\_\_Gloeocapsa\_sp\_PCC\_73106:0.01599,652402791\_\_Planktothrix:0.08405)0.738:0.00938)0.797:0.01128,(((503085700\_\_Cyanotheca\_sp\_PCC\_7822:0.02756,503088683\_\_Cyanotheca\_sp\_PCC\_7822:0.03888)0.929:0.03475,503086059\_\_Cyanotheca\_sp\_PCC\_7822:0.09689)0.750:0.00886)0.781:0.00979)0.789:0.02022,(((515886569\_\_Mastigocladopsis\_repens:0.04350,740253778\_\_Tolypothrix\_boutellei:0.05881)0.989:0.09857,(504891808\_\_Anabaena\_sp\_90:0.06018,(755140659\_\_Anabaena\_sp\_PCC\_7108:0.04192,(653153939\_\_Aphanizomenon\_flos\_aquae:0.02722,505011639\_\_Calothrix\_parietina:0.08673)0.680:0.00489)0.754:0.02215)0.982:0.07857)0.564:0.04773)0.573:0.00200)0.912:0.03605)0.323:0.00821,(518333149\_\_Pleurocapsa\_sp\_PCC\_7319:0.24884,(494517852\_\_Crocospaera\_watsonii:0.06055,(67855965\_\_Crocospaera\_watsonii\_WH\_8501:0.05583,494515958\_\_Crocospaera\_watsonii:0.06864)0.137:0.01537)0.889:0.04043)0.904:0.03838)0.763:0.00934,(493500461\_\_Synechococcus\_sp\_PCC\_7335:0.17168,516255175\_\_Geitlerinema\_sp\_PCC\_7105:0.10290)0.953:0.07292)0.885:0.02319)0.787:0.01786,(((915329395\_\_Synechococcus\_sp\_PCC\_7335:0.19717,(505041852\_\_Dactylococcopsis\_salina:0.03048,(428689568\_\_Halotheca\_sp\_PCC\_7418:0.21024,(505040939\_\_Dactylococcopsis\_salina:0.05492,505043997\_\_Dactylococcopsis\_salina:0.04052)0.844:0.01810)0.486:0.00014)0.862:0.04074)0.853:0.02395,(((764672287\_\_Mastigocladus\_laminosus:0.10758,657932748\_\_Scytonema\_hofmanni\_UTEX\_B\_1581:0.05334)0.838:0.03145,(((196183795\_\_Coleofasciculus\_chthonoplastes\_PCC\_7420\_ISC1\_1\_CC:0.03129,493028331\_\_Coleofasciculus\_chthonoplastes:0.05649)0.768:0.01025,763347217\_\_Coleofasciculus\_chthonoplastes:0.02124)0.470:0.01046,493031658\_\_Coleofasciculus\_chthonoplastes:0.04521)0.829:0.03133,493034793\_\_Coleofasciculus\_chthonoplastes:0.00714)1.000:0.18558)0.367:0.02733,751571642\_\_Tolypothrix\_campyloneoides:0.07608)0.812:0.03456,515389315\_\_Chlorogloeopsis\_fritschii:0.06676)0.730:0.04557)0.337:0.00015)0.306:0.02026)0.915:0.07927,(654348422\_\_Mastigocoleus\_testarum:0.09794,654348331\_\_Mastigocoleus\_testarum:0.06345)0.844:0.05296)0.907:0.12765)0.969:0.20134,(506218806\_\_Ammonifex\_degensii:0.05176,503587794\_\_Desulfotomaculum\_kuznetsovii:0.03170)1.000:0.54387)0.902:0.13292)0.961:0.11502,(((917665054\_\_Thermincola\_ferriacetica:0.20763,916738862\_\_Thermodesulfovibrio\_islandicus:0.29688)0.982:0.25427,(503547901\_\_Mahella\_australiensis:0.38023,(769144095\_\_Anaerostipes\_hadrus:0.031786,739495022\_\_Selenomonas\_sp\_FC4001:0.40174)0.991:0.21750)0.992:0.26849)0.426:0.09665,(((571050767\_\_uncultured\_bacterium\_Contig26:0.45274,(291529497\_\_Eubacterium\_rectale\_M104/1:0.12403,910080418\_\_Anaerostipes\_hadrus:0.18458)0.981:0.23809)0.994:0.23846,(334307204\_\_Lactobacillus\_salivarius\_NIAS\_840:0.02185,(((640592508\_\_Lactobacillus\_equi:0.04180,564807354\_\_Lactobacillus\_equi:0.08070)0.867:0.05837,914619641\_\_Lactobacillus\_agilis:0.09620)0.742:0.03282)1.000:0.56402)0.901:0.09588,(((488782245\_\_Microscilla\_marina:0.36949,(524427328\_\_Clostridium\_sp\_CAG\_265:0.17989,(497580664\_\_Peptoclostridium\_difficile:0.06628,(662066808\_\_Clostridium\_botulinum:0.09087,658102102\_\_Clostridium\_haemolyticum\_NCTC\_9693\_ISC2Y\_1\_CH:0.09389)0.865:0.03105)0.602:0.02986)0.866:0.06402)0.941:0.09096,(((169408891\_\_Clostridium\_botulinum\_A3\_str\_Loch\_Maree:0.17548,496658392\_\_Coprobasillus\_sp\_3\_3\_56FAA:0.55872)0.727:0.02881,(((763349453\_\_Coleofasciculus\_chthonoplastes:0.13465,(516350411\_\_Scytonema\_hofmanni:0.09206,516360165\_\_Scytonema\_hofmanni:0.05938)0.907:0.07992)0.995:0.17048,(825903244\_\_Aneurinibacillus\_tyrosinisolvans:0.17884,835374448\_\_Peptococcaceae\_bacterium\_CEB3:0.21763)0.825:0.05111)0.773:0.02650)0.969:0.06045,(((851245734\_\_Methanosarcina\_lacusstris:0.16018,(((530562102\_\_Ferroplasma\_sp\_Type\_II:0.04472,(((530553011\_\_Thermoplasmatales\_archaeon\_E\_plasma:0.07485,(530562869\_\_Ferroplasma\_sp\_Type\_II:0.00015,(530558821\_\_Ferroplasma\_sp\_Type\_II:0.02067,530559506\_\_Ferroplasma\_sp\_Type\_II:0.02339)0.984:0.07438)0.773:0.03883)0.973:0.05209,530563573\_\_Ferroplasma\_sp\_Type\_II:0.05751)0.917:0.03065)0.824:0.01823,530560308\_\_Ferroplasma\_sp\_Type\_II:0.03036)0.881:0.03763,530561424\_\_Ferroplasma\_sp\_Type\_II:0.04161)1.000:0.30214)0.953:0.08510,748817658\_\_Bacillus\_sp\_REN51N:0.22071)0.851:0.02438)0.832:0.03401)0.920:0.07260)0.974:0.12068,(((701167301\_\_Fervidobacterium\_islandicum:0.05711,(((771515678\_\_Caldicellulosiruptor\_sp\_Rt8B8:0.06785,(501575717\_\_Thermosiphon\_africanus:0.06140,503198332\_\_Caldicellulosiruptor:0.10167)0.742:0.01644)0.989:0.08039,(647307155\_\_Caldicoprobaacter\_oshimai:0.03912,647308279\_\_Caldicoprobaacter\_oshimai:0.02439)0.903:0.03330)0.821:0.03062)0.999:0.19890,(917001966\_\_Selenomonas\_sp\_FC4001:0.34094,(524087929\_\_Clostridium\_sp\_CAG\_678:0.14465,(564132996\_\_Youngiibacter\_fragilis\_2321\_IS2\_1\_YF:0.19037,(167832304\_\_Fingoldia\_magna\_ATCC\_29328:0.14116,(((916839822\_\_Hungatella\_hathewayi:0.16150,(507803517\_\_Firmicutes\_bacterium\_M10\_2:0.09711,(((769158866\_\_Oribacterium\_sp\_NK2B42:0.04457,389313404\_\_Eubacterium\_cellulosolvans\_6:0.06316)0.969:0.08464,(656255040\_\_Oribacterium\_sp\_NK2B42:0.10952,769138930\_\_Oribacterium\_sp\_FC2011:0.07745)0.764:0.02551)0.989:0.10490)0.432:0.01187)0.847:0.02300,(((734921353\_\_Desulfosporosinus\_sp\_BICA1\_9:0.1

0461,734927385\_\_Desulfosporosinus\_sp\_BICA1\_9:0.05185)0.957:0.06879,495125196\_\_Bacteroides\_dorei:0.10586)0.130:0.01318)0.829:0.02471)0.835:0.01956)0.595:0.01411)0.928:0.04839,(((52104445\_\_Sulfo bacillus\_thermosulfidooxidans:0.05943,521043078\_\_Sulfobacillus\_thermosulfidooxidans:0.17476)0.166 :0.01343,((503962154\_\_Geobacillus:0.12089,(497357338\_\_Paenibacillus:0.05914,759011080\_\_Aneurinib acillus\_migulanus:0.05116)0.949:0.05289)0.965:0.05658,(502938756\_\_Bacillus\_selenitireducens:0.105 29,(501338645\_\_Exiguobacterium\_sibiricum:0.06780,657218740\_\_Exiguobacterium\_oxidotolerans:0.05072 )0.988:0.07588)0.942:0.04580)0.572:0.00860,501427288\_\_Natranaerobius\_thermophilus:0.22968)0.727:0 .00792)0.984:0.08228,736402181\_\_Clostridiales\_bacterium\_DRI\_13:0.14545)0.908:0.03462,((302858730\_\_ Burkholderiales\_bacterium\_1\_1\_47:0.16125,(404658355\_\_Sutterella\_wadsworthensis\_2\_1\_59BFAA:0.0676 7,404657206\_\_Sutterella\_wadsworthensis\_2\_1\_59BFAA:0.07755)0.944:0.06002)0.996:0.11164,(501164742\_\_ Petrotoga\_mobilis:0.02451,501164645\_\_Petrotoga\_mobilis:0.04043)0.994:0.09912)0.807:0.02309)0.588 :0.02108)0.877:0.03743)0.976:0.10020)0.879:0.04534)0.960:0.10074)0.187:0.01440)0.753:0.02440,(736 402546\_\_Clostridiales\_bacterium\_DRI\_13:0.35149,(769148683\_\_Anaerostipes\_hadrus\_ISC2\_1\_AH:0.45159 ,(((228768623\_\_Bacillus\_pseudomycoides\_DSM\_12442:0.07051,737452652\_\_Bacillus\_sp\_UNC322MFChir41:0. 01957)1.000:0.25572,(((829601212\_\_Enterococcus\_cecorum:0.03976,829618566\_\_Enterococcus\_cecorum:0. 03033)0.902:0.04949,(524566620\_\_Firmicutes\_bacterium\_CAG\_227:0.16555,(653226247\_\_Lachnospira\_mult ipara:0.04144,(291529631\_\_Eubacterium\_rectale\_M104/1:0.06243,769148495\_\_Anaerostipes\_hadrus:0.101 02)0.937:0.04358)0.000:0.01700)0.863:0.04515)0.984:0.10106,(739495030\_\_Selenomonas\_sp\_FC4001:0.11 836,(917481455\_\_Paenibacillus\_wynnii:0.22166,(545380023\_\_Aneurinibacillus\_aneurinilyticus:0.09455 ,489446257\_\_Bacillus\_methanolicus:0.08318)0.970:0.07275)0.597:0.00970)0.649:0.04406)0.312:0.03158 )0.980:0.09126,(489707312\_\_Lactobacillus\_delbrueckii:0.26062,(916618137\_\_Lactobacillus\_harbinensi s:0.26889,(334307171\_\_Lactobacillus\_salivarius\_NIAS840:0.03087,763126099\_\_Lactobacillus\_salivari us:0.06354)0.715:0.04548,(640591712\_\_Lactobacillus\_equi:0.03398,(564812736\_\_Lactobacillus\_equi:0 .05633,916921277\_\_Lactobacillus\_equi:0.04129)0.297:0.01115)0.952:0.04547,(737470902\_\_Lactobacillu s\_composti:0.00243,(917397795\_\_Lactobacillus\_composti:0.06414,737473603\_\_Lactobacillus\_composti: 0.02415)0.948:0.02794,737472691\_\_Lactobacillus\_composti:0.04281)0.093:0.00558)0.999:0.13235)0.383 :0.04492)0.722:0.03135)0.983:0.10398)0.582:0.05225)0.844:0.04939)0.902:0.07839)0.906:0.08474)0.41 8:0.02977,((29755535\_\_Ktedonobacter\_racemifer\_DSM\_44963:0.04246,297555563\_\_Ktedonobacter\_racemif er\_DSM\_44963:0.04207)1.000:0.25112,(((851238757\_\_Methanosarcina\_lacustris:0.04190,(805341356\_\_Me thanosarcina\_sp\_WH1:0.05290,851314722\_\_Methanosarcina\_sp\_MTP4:0.01888)0.208:0.01524)0.836:0.06044 ,(502959253\_\_Methanohalobium\_evestigatum:0.03473,502959917\_\_Methanohalobium\_evestigatum:0.06758)0 .999:0.17698)0.537:0.05965,(723287744\_\_Candidatus\_Thiomargarita\_nelsonii:0.15081,(739163742\_\_Psc hromonas\_aquimarina:0.10502,499649188\_\_Pseudoalteromonas\_haloplanktis:0.08354)0.917:0.07976)0.710 :0.04033)0.992:0.19783,(517533367\_\_Anaeromusa\_acidaminophila:0.13179,(((495194584\_\_Ktedonobacter \_racemifer:0.07625,495185044\_\_Ktedonobacter\_racemifer:0.03110)0.866:0.02939,(297556617\_\_Ktedonoba cter\_racemifer\_DSM\_44963:0.06851,495197893\_\_Ktedonobacter\_racemifer:0.10651)0.290:0.01689)0.441:0 .00696,(297555630\_\_Ktedonobacter\_racemifer\_DSM\_44963:0.07828,297548145\_\_Ktedonobacter\_racemifer\_D SM\_44963:0.10055)0.695:0.02795)0.921:0.06791,(406985418\_\_uncultured\_bacterium:0.10002,(510929983\_\_ Enterococcus\_cecorum:0.16998,(496658465\_\_Coprobacillus\_sp\_3\_3\_56FAA:0.06067,(551011564\_\_Butyrivi brio\_fibrisolvens:0.07134,429177907\_\_Anaerostipes\_hadrus\_DSM\_3319:0.03728)0.735:0.01148)0.923:0.0 5865)0.986:0.13195)0.513:0.05237)0.851:0.03284)0.987:0.17088)0.995:0.19607)0.761:0.07745)1.000:0. 17176)0.832:0.02497)0.786:0.02605)0.838:0.01898,(((654353688\_\_Mastigocoleus\_testarum:0.09621,65 4350231\_\_Mastigocoleus\_testarum:0.09330)0.309:0.01859,(495553706\_\_Cyanotheca\_sp\_CCY0110:0.09371,9 16793994\_\_Campylobacter\_fetus:0.43989)0.692:0.01630)0.772:0.00861,(((763475824\_\_Peptoclostridium\_ difficile:0.19352,503043082\_\_Acetohalobium\_arabaticum:0.22559)0.967:0.06073,(502958892\_\_Methanoha lobium\_evestigatum:0.11800,(851270337\_\_Methanosarcina\_horonobensis:0.05141,(851241801\_\_Methanosa rcina\_lacustris:0.05998,(805378337\_\_Methanosarcina\_lacustris\_Z\_7289:0.03438,805378795\_\_Methanosar cina\_lacustris\_Z\_7289\_\_ISC2\_1\_ML:0.01750)0.216:0.00874)0.849:0.02606)0.980:0.07065,(432001730\_\_An oxybacillus\_flavithermus\_TNO\_09006\_\_ISC2\_1\_AF:0.06413,(506389025\_\_Caldicellulosiruptor\_bescii:0.0 6040,771520715\_\_Caldicellulosiruptor\_sp\_Wai35B1:0.03848)0.953:0.05502)0.940:0.05499)0.322:0.03318 )0.933:0.06271)0.729:0.01005,495462176\_\_Moorea\_producens:0.09757)0.876:0.02245)0.209:0.00352,(((9 18439172\_\_Tolypothrix\_campylonemoides:0.22111,(516352542\_\_Scytonema\_hofmanni:0.07507,(910241764\_\_ Tolypothrix\_boutellei:0.07266,(910240999\_\_Tolypothrix\_boutellei:0.05508,(516354009\_\_Scytonema\_h ofmanni:0.02813,516353909\_\_Scytonema\_hofmanni:0.05691)0.805:0.01182)0.004:0.00016)0.539:0.01539)0 .994:0.14569)0.942:0.07447,(648401347\_\_Calothrix\_sp\_PCC\_7103:0.16125,505041320\_\_Dactylococcopsis\_ salina:0.25993)0.908:0.06384)0.972:0.08393,((495460520\_\_Moorea\_producens:0.10095,495464380\_\_Moore a\_producens:0.05675)0.992:0.07907,(505041099\_\_Dactylococcopsis\_salina:0.13246,(196178332\_\_Coleofa sciculum\_chthonoplastes\_PCC\_7420:0.10200,(764673158\_\_Mastigocladus\_laminosus:0.01762,(740261246\_\_ Tolypothrix\_boutellei:0.03638,657931856\_\_Scytonema\_hofmanni\_UTEX\_B\_1581:0.02891)0.830:0.01151)0. 965:0.05305)0.962:0.06746)0.879:0.03507)0.844:0.03414)0.533:0.03086)0.875:0.01864,(((516255251\_\_ Geitlerinema\_sp\_PCC\_7105:0.06060,(504975996\_\_Chroococcidiopsis\_thermalis:0.11056,503100072\_\_Cyan otheca\_sp\_PCC\_7822:0.07852)0.316:0.00849)0.169:0.00014,(251771163\_\_Leptospirillum\_ferrodiazotrop

hum:0.37002,(504992576\_\_Oscillatoria\_nigro\_viridis:0.10283,504987354\_\_Oscillatoria\_nigro\_viridis:0.03708)0.975:0.13069)0.648:0.05959,808794842\_\_Limnographis\_robusta:0.06220)0.856:0.03346)0.824:0.01751,(209494659\_\_Arthrospira\_maxima\_CS\_328:0.04546,119457943\_\_Lyngbya\_sp\_PCC\_8106:0.08773)0.133:0.01925)0.759:0.01540,((836681294\_\_Peptococcaceae\_bacterium\_CEB3:0.13663,505015454\_\_Crinalium\_epipsammum:0.09213)0.297:0.02569,(((494595516\_\_Kamptonema:0.04704,494595821\_\_Kamptonema:0.04838)0.830:0.01679,((657936925\_\_Scytonema\_hofmanni\_UTEX\_B\_1581:0.08658,(657936249\_\_Scytonema\_hofmanni\_UTEX\_B\_1581:0.13929,493207436\_\_Nodularia\_spumigena:0.16613)0.732:0.04268)0.872:0.02884,(504891042\_\_Anabaena\_sp\_90:0.08114,652400688\_\_Planktothrix\_prolifera:0.10684)0.682:0.00695)0.783:0.00681)0.899:0.01954,(196178243\_\_Coleofasciculus\_chthonoplastes\_PCC\_7420:0.13065,494598848\_\_Kamptonema:0.09496)0.589:0.00031)0.624:0.01048)0.798:0.01155)0.822:0.01239,(((515883449\_\_Mastigocladopsis\_repens:0.08389,(751568033\_\_Tolypothrix\_campylonemoides:0.04533,(504975991\_\_Chroococciopsis\_thermalis:0.04851,(515355474\_\_Fischerella\_muscicola:0.04095,(751564179\_\_Tolypothrix\_campylonemoides:0.04573,751565661\_\_Tolypothrix\_campylonemoides:0.04588)0.729:0.00582)0.741:0.00414)0.812:0.01967)0.567:0.01701)0.925:0.04395,(738539867\_\_Myxosarcina\_sp\_GI1:0.12236,498160623\_\_Acaryochloris\_sp\_CCME5\_5410:0.10064)0.706:0.02796)0.830:0.01586,(218172972\_\_Cyanotheca\_sp\_PCC\_7424:0.12197,((515883518\_\_Mastigocladopsis\_repens:0.16510,495466012\_\_Moorea\_producens:0.07644)0.941:0.05201,(504938402\_\_Synechococcus\_sp\_PCC\_6312:0.05485,505037441\_\_Halotheca\_sp\_PCC\_7418:0.05908)0.878:0.02017)0.298:0.00614)0.821:0.01242)0.833:0.01871,(818877501\_\_Microgenomates\_bacterium\_GW2011\_GWB1\_49\_7:0.16404,(((495466227\_\_Moorea\_producens:0.09737,505042970\_\_Dactylococcopsis\_salina:0.13007)0.726:0.03241,((495466254\_\_Moorea\_producens:0.01549,((808795150\_\_Limnographis\_robusta:0.05028,(((495465906\_\_Moorea\_producens:0.08462,495454362\_\_Moorea\_producens:0.02377)0.925:0.03279,495453270\_\_Moorea\_producens:0.07059)0.747:0.00601,(763350561\_\_Coleofasciculus\_chthonoplastes:0.03686,(505014506\_\_Crinalium\_epipsammum:0.03537,493029926\_\_Coleofasciculus\_chthonoplastes:0.01708)0.842:0.01220)0.767:0.00612)0.784:0.00806,880798139\_\_Moorea\_bouillonii\_PNG5\_198:0.06429)0.733:0.01295)0.765:0.00604,(495461888\_\_Moorea\_producens:0.03287,(495459261\_\_Moorea\_producens:0.05230,495466178\_\_Moorea\_producens:0.02497)0.824:0.01775)0.839:0.01706)0.890:0.01815)0.991:0.08101,(493558269\_\_Xenococcus\_sp\_PCC\_7305:0.12559,(504964918\_\_Oscillatoria\_acuminata:0.09111,(516257699\_\_Geitlerinema\_sp\_PCC\_7105\_ISC2\_1\_GS:0.01540,(516256579\_\_Geitlerinema\_sp\_PCC\_7105:0.04959,(516257677\_\_Geitlerinema\_sp\_PCC\_7105:0.02353,(516255311\_\_Geitlerinema\_sp\_PCC\_7105:0.03009,648405926\_\_Geitlerinema\_sp\_PCC\_7105\_ISC2\_2\_GS:0.03538)0.961:0.05373)0.957:0.06254)0.795:0.01716)0.816:0.01621)0.844:0.02968)0.802:0.02529)0.775:0.02675)0.301:0.02295,((657933271\_\_Scytonema\_hofmanni\_UTEX\_B\_1581:0.04762,(504992636\_\_Oscillatoria\_nigro\_viridis:0.09100,657934620\_\_Scytonema\_hofmanni\_UTEX\_B\_1581:0.09630)0.751:0.01238)0.724:0.00991,504988195\_\_Oscillatoria\_nigro\_viridis:0.05118)0.974:0.04841)0.863:0.02742)0.750:0.00016)0.856:0.01311)0.431:0.00582)0.807:0.00913);

## Supplemental Figure 9.

### The TnpB of *IS605* and *IS605B* transposons are targeted by the mobile group II introns

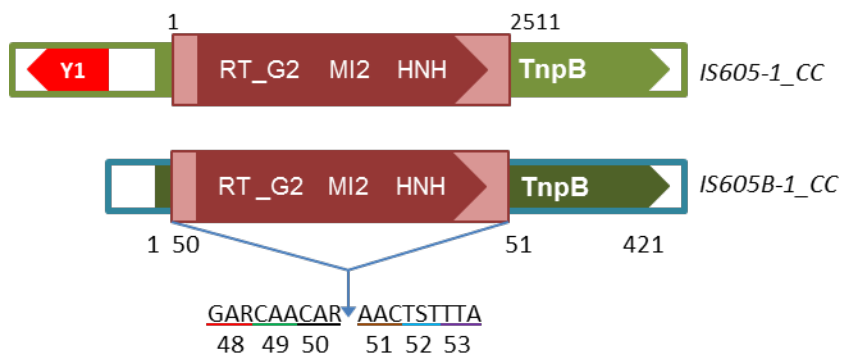

**Figure S9A.** Target site-specific insertions of identical copies of a 2511-bp mobile group 2 intron into TnpB-coding ORFs in the *IS605-1\_CC* and *IS605B-1\_CC* transposons. The transposons orientation was changed according to the orientations of the ORFs coding for the TnpB and RT\_G2-MI2-HNH proteins. Amino acid positions of the encoded TnpB proteins corresponds to the TnpB protein encoded by the *IS605-1\_NP* transposon. RT\_G2, MI2, and HNH are the reverse transcriptase, RNA-binding maturase, and homing HNH endonuclease domains. TnpB-coding ORFs in *IS605-1\_CC* and *IS605B-1\_CC* transposons are only 60% identical to each other; there is no significant similarity between the remaining parts of these transposons.

In the *C. chthonoplastes* PCC 7420 genome, we identified a 72-bp region that is ~86% identical to the 3'-sequence of ISC1-2\_CC (Fig. S6A). In line with the findings reported in our paper, this region is the 3'-terminal portion of a *IS605*-like transposon: the 3' end of a TnpA gene is situated 25-bp upstream of this region, and the TnpB gene, which is transcribed in the opposite orientation, is located ~2.8-kb upstream of TnpA. This transposon, *IS605-1\_CC*, is present in the *C. chthonoplastes* genome as a single copy; therefore its 5'-terminus cannot be defined without additional DNA sequences of similar transposons from other species. Using the TnpB gene sequence as a query in a BLASTN search against the bacterial sequences in GenBank, we found that the genomes of the cyanobacteria *Anabaena cylindrica* PCC 7122 and *Nostoc sp.* PCC 7107 contain, respectively, 2 and 4 sequences ~70% identical to the query. As a result, we identified two transposons, *IS605-1\_AC* (2 copies 99.7% identical to each other) and *IS605-1\_NS* (4 copies, including 3 copies 100% identical to each other). Based on the comparison of the TnpB ORFs in these two transposons with their homolog from *C. chthonoplastes*, we found that the latter is disrupted by a 2511-bp insertion that encodes a 600-aa protein that consists of a reverse transcriptase (RT\_G2 family), a GIIM maturase and a HNH

homing endonuclease which are the hallmarks of bacterial mobile group II introns {Lambowitz, 2011 #50} (Fig. S6A, S6B).

In addition to the identified insertion of the 2511-bp retroelement in the *IS605-1\_CC* transposon, the *C. chthonoplastes* genome contains two copies of the same element that are 100% identical to each other and differ from the inserted copy by a single nucleotide substitution. Surprisingly, these two copies are inserted into the same position in another TnpB gene of an *IS605B-1\_CC* transposon. The genome contains three nearly identical copies of this transposon. The transposon encodes a TnpB protein that is only 58% identical to TnpB in *IS605-1\_CC*. One of these copies contains an intact TnpB gene whereas in the two other copies this gene is disrupted by the Group II intron insertions. All three insertions reside precisely at the same position between codons encoding EQQ and NC/SL amino acids (between aa-positions 50 and 51 in TnpB from *IS605-1\_NS*). Given that the “empty” copy of *IS605B-1\_CC* and the two copies containing the mobile intron are nearly identical, comparison of these transposons does not allow one to determine whether both insertions occurred recently and independently at the same target site in two identical copies or it was actually only one insertion followed by transposition of the “composite” *IS605B-1\_CC* transposon. However, given the low DNA identity between *IS605-1\_CC* and *IS605B-1\_CC* (~60% between the TnpB genes), it is clear that nearly identical 2511-bp copies of the mobile intron were integrated independently into the GARCAACAR|AACTSTTA target site (Fig. S6A).

Due to the target-site specificity, the orientation of both ORFs, coding for TnpB and RT-HNH, is the same. Preliminary analysis reveals many other examples of insertion of mobile group II RT-HNH introns, distantly related to the one reported here, into different positions of TnpB genes (data not shown). Thus, the HNH nuclease domain present in Cas9 and IscB might have been originally contributed by a mobile group II intron inserted into a TnpB gene.





S: GAGCCAATCTTAGCTAACTCTAGATAACCGTTATCACCCGTTGTATGTACCTTCCAGCCTGTTTTACTTG  
Q: TTGCCAATTTTGGATAGATTTCAGATAACCCATTCTCGCCATTAGATTCTACTTTAAACCCAGCAGAATCTG

S: GATAAGTCCATCCAGAATAATGTTTAAATTGACTTATATTTGGGTCGCTTTGCTAAACCCTTAAACCAACG  
Q: GATATGTCCACCCGAATAATGCCTGATTGATTTGAATCTAGGACGTTTACCCAACCCCTTAAACCCAGCG

S: ATTAATGCGTAATCGACACGCTTTAAAGTGGCTTGTAGAGTCATGG-----AATTGCATTCTTTGTACT  
Q: TTCAAAAGCAAAATCAACCCGCTTTAAAGTCGCCTGTAAAG-CATGGCTAGGAA----GCTCTTTGTATT

1176

S: CTGTCCAAACTTCTTTAAAAGCCGGTAAAGAGTTATTAACCTCAACGAGACTGTCACCAGTCCCCCTGGT  
Q: CTACCAGACTTCTTTAAACGCTGGCAAACAATT-----

S: CTTCAAACCGTGGCGTAAAGTTTCTCTCACACGGCTCCTCAACGATAAGGTGCAAGTCATGCATACCT  
Q: -----

S: CATTACCCATTGTCTCGACTCTTTTCGAGCCTTTTGGTGAGCTTAGGCTTGGCACTGTTACAGCCAGAT  
Q: -----

S: TGATTGCCGAGACTGCCATCTGTGACGGTCTTTGTGTCATGGCAATGTCTATGTAGAAGCTGCCAATTAT  
Q: -----

S: CGTAGAAATCCTTTCCACCTTGCAGCTTAGGGATTCTGTGGTCAACTCCATCACATCGTTTTTCACGGAA  
Q: -----

S: AATTAATCCGCAGTGAGTACATTTCCCTTTTTGCTTCTTCAACAATGTTGCCAGTGTCTTAGGCATTTCA  
Q: -----

S: GGGTTGTTACCCATTCTTGAACCTCAATAAACCAAGTTGCCGTTGTATGGGGACGATTTCGCCCTTAACT  
Q: -----

S: TTACATAGCGCTTAATTGGTGTTCGCTATGTTTTAGTAACCGCTAGGGTTATTACCTTTTTGCCTGGT  
Q: -----

S: TGCGAATACCCAGTTGTCGCGCTCTATGGATTGCCAATACTTCTTTGACACCCATCCCCGGATTTTTTG  
Q: -----

S: GGGTGTGCGCGCTTTGCCAAGCTCTGAGCTTCTGGTACATGAGGTAATCTTGGTACAGTAAGCCACCT  
Q: -----

S: TACTTACTTGTGTTGCGTAGTAGTTAGCCCATCCCCGAATAATCGGGTTCAGTTTCTTAATTAGCGCCAC  
Q: -----

S: TTGTGGTGCATTCTGTGGCGTTGATAACTCCGCAATCTGTTTCGTTAGTGTACCTTCTGCTTATCCTTG  
Q: -----

S: CTTGGGGTGATGATTGGTTTTATTCTAGCGCTTCCATATTTGTCTTTTCCAGAGTGGTATTTACCCA  
Q: -----

S: CTTTGTATTGACGTATATTGAAGCCAAGGAAATCAAATCCTGGCTGTTCTTGTTCATACGGGTTGAGGGT  
Q: -----

S: GTGAGCAAGTCTTGTGTTGCTAGGTTTTAGTTCAAAACCCATGTCTTTCAACCATTCTGGATTATATCC  
Q: -----

S: TTGCCACTTTGGACGATGGTTAAGTCTTCGTGGAGAATCACGAAGTCGTCCGCATATCTGATCACGGATG  
Q: -----

S: GAGGATAGAATGTCTTCTTTACCCCATTTTCAGAGTATCCCCGTTTTGGGAATACCCTTTTGATTAGATT

Q: -----

S: TTCCATCCCCTGGAGGGCAATGTTTGCTAGTAAACGGAGAAATGACCCCGCCTGTGGCGTTCCCTCAGTT

Q: -----

S: GTTGAAAACAACTGCTTTGCGTCCATCACTCCCCCTTTAAACCATGCTCGGATTTGACGGCGTATGGTAG

Q: -----

S: GGAATGTATTTAATTTTCTTAGCAGTGCTTTATGGTCGATTGGTCAAAGCATTAGCAATATCGGCATC

Q: -----

S: AAGGACATATTTGCCCTTAAACCTAATGTGTATATATAGCCTGAACCGCATCGTGACATGAGCGTCCG

Q: -----

S: GGTCTGAAACCGTATGAGTTGGCTTCAAATCGCGCTTCCCATTTCTGGCTCTAGTGCCAGTTTGACAAGTG

Q: -----

S: CTTGCAAAGCTCGGTCTTTCATTGTGCGGATGCCTAAAGGTCTTTTCTCCTCCTTTCCGGGTTTGGGAAT

Q: -----

S: CCATACTCGCCTGGTTGGAGCGACCTTGAACATAGTTTTAGATTTCAACCAAGATGAGACGTTGCTTT

Q: -----

S: GGGGTGAGTACTTAACACCATCCACACCTGCCGTCTTCTTACCTTGATTGTCTTGGGTAACCCGGCGAA

Q: -----

S: CCGAGAGACATTTTGCTGCCAGGACTTCATCAGCATCTTTTGAGTCTGCGAGTCATTTTCACATCGCC

Q: -----

S: ACGCTGAGAGGCTCGATAGATCTCTTCTGCAACTGTAGACTTTACGCTCTAGTTTTTGCCAGGGTATT

Q: -----

S: GCCTTCCATTCCATCGTAGTCTTTAAACTCGCTTTAGACATTTGTATTGCTACTTAAGACTCTATCTTTC

Q: -----

S: CTTATCATCGTGAGTCTGTTGGCGTATCCCTCTTATTAGTAGAGAGCGTTAGCTTCTGACTCAATCTTTC

Q: -----

S: CTCCCATTTGCTTGGCGTTGGCACCTACTCAGGCATCGACCTGACTGAGAGCATAAGGGAGTTATCTCGT

Q: -----

S: TCCTGATAGCCATTGTTGAACTTTTAGGATGGTACTATCCACCGGTTTATAGGGAGTACAAGTTGGTC

Q: -----

S: AACAAACAAAATGCCAACCCCTGATTTCTGTGCCTTTTGGCTCCAGTGTGCAGCCTTATTACACTGGT

Q: -----

S: TCTTCGTAACGATGGTTCAGTCGTACCTTCGTATTCCTATCCATGAGTCTTGCTCGATGGTTGCCGGAT

Q: -----

S: TAGGCTTCCAGCATTGCCACCTTTCACCCCGCTTTAGGCTTTGATAACCAGTCTCAACCTAGGGGACA

Q: -----

S: AGGTTTTAAAAACCTGGCTCTGTGTGCTTTTACTCCTGTACTTAGAGAGTAGGACTTGAGAGTTTGCTT

Q: -----

Q: -----

S: **TCTCTCACCTACATGGCTATCAAGTTGTCAAGGTTGACACCTTGACAGGTAATCCTCTATCCATTTGAGGA**

Q: -----

3688

S: **ATAGTTTCTACCTAACGATTGCGACTTGTGTGCTCGAAGTAGTCAACGCTATGGTTGAACTTCTGGTACTG**

Q: -----TTGTTGCTCAAATAATCAACCTTGTGGTTAAACTTTTGATATTG

S: GGTAAACCGATTACAGACAGCAGCGTGTGTACAGGCTTTGTGCAACTTACGGTGATACCGCAATGTCTGC

Q: GGTAAATCTGTTATTGACTGCGGCGTTAAATAAGTCTTTGTGTAACCTTTCGGTGATACCGCAAT-TTTGA

S: TTTTGCT-TTTTATTGGGGTATAGCCGAAAATTTACAGTCTTGTGGCATCGC-----TGTTCCTC--

Q: TTCAGTTGCTGATTGTTGATATAACCGGAAAGTCATACGCTCTGATCGCCACAGTAAATATTTACCCTCTG

S: -----CTGTTACACT--TAAGGTAA--CAGATTGAGGTGAGGGTATGTCAAGTGAAAGCTAGAAAAG

Q: TTTAAATCTGTTATTTTATTAATAATAAATAGACACGGG---GGTTTGTCAAGTGGTTGCTCGTAAAG

S: GTTCGCACTCTGTATTTTCTGTTCAACTGCATATAGTATTTGTAACATAAATACAGGCGCAAGATTATTAC

Q: GCTCACACGCTGTATTTCTTATTACCTACACTTTATATTTGTGACTAAATACCGAAAAGAAAATAATTAA

S: AGTGGGAATGTTACAGAGATTACATGAAGTGCTTGCCAAATGTTTGTATTAAGACAAAGTGTGGTTAGTA

Q: TGCTCCAATACTGGAAGAATGCACGAGATTTTGGCAAATATCTGCATTAAGACTAACTGCATATTAGTA

S: GAGTTTTCTCAGGAGAAGCTGACCATGTACATCTATTAGTAGACTTTTCATCCTGACAACAATTTATCATCTC

Q: GAGTTTTCTGGTGAACAAGATCAGTTCATTTACTGGTGGACTATCACCTGACAATAAT-----ATTTT

S: TAATTGG-----TAGTATGAAGTCTGCATCTAGTCGAATCATCAGAAAAGACTTTGCTGCTCAACTGTCA

Q: TGATTTTACATCTAGTTTAAATCTGCTAGTAGCCGATTATTCGTAAGAATTTA-----A

S: AAAAC-----TTATACTAAGTCGGCATTTTGGTGGGTTCTTATTATGTTGCGTCTACTGGC

Q: AGAACATATTGATAAATTTTATTGGAACCTGTCTTTTGGTCTAGCTCGTATTATGTGGCATCAAGTGGT

S: GGTGCGCCTATTGAGAGAATTAAGGC--TTACATCAAATCACAAGACGCACCCA-----

Q: GGTGCGCAATTGA-AAAATAAAAACAATATATTAAGGAACAAGACGCACCAACGAAGTAAATAGAATAG

S: -AAAATTGATTGCCTCCGTTCTCCGGCAAT---CCGCTATCCCTCCTCACCCCTCCTGAGCCTGCGAAGG

Q: AAAGATTGGTTATTTTCGTTCACT-GCAATAACCGCTCTAACCCT-ACCCT-----ATGG

S: ATCTGCTGAGGGTGAGGACTCTCGCGA

Q: GTACATTGAGGGTAGGGACTGCCGCGA

**Figure S9C.** Pairwise alignment of the 4399-bp *ISC1-2\_CC* transposon containing the insertion of the mobile group 2 retroelement (shown in bold) with a *IS605-1\_AC* transposon identified in the *Anabaena cylindrica* PCC 7122 genome.

IS605-1\_CC                    1176 64  
 IS605-1\_AC\_TnpB            51 419  
 Identity = 0.7027

S:1176 NSLPAPKEVWTEYKECNSMTLQATLKRVDYAFNRWFKGLAKRPKYKSIKHYSGWTYP SKTGKVVHTTGDN 967  
 N LPAPKEVW EYKE S LQATLKRVD+AF RWFKGL:KRP++KSI+HYSGWYTP G+KV + G+N  
 Q: 51 NCLPAPKEVWVEYKELPSHALQATLKRVDFAFERWFKGLGKRPRFKSIRHYSGWYTPDSAGFKVESNGEN 120

S: 966 GYLELAKIGSIQMRGKARIWGTPTTCTIVYRNKRKYASITVNI TELQAATRQTD FGSV GIDFGCKSALAI 757  
 GYL L+KIG IQMRG+A+ WG PTTCTIV+RN KKYASITVN+ E + G+VGID GCKSAL+I



S: CGACGTTTTCCCTTAGAAAAGACGCTTAATTTGGCTTCAGCTTTTCGCAAAAACCTTAGGAGCTTCAATGA  
Q: CGCCTCTCTCCTTAGAAGCTTTTGGATTTCTGTTCAGCATTCTCAAAAACCTTAGGAGCATCGATTT

S: AAGAATGATTTTCTCCATCAGTTATTGCTAACGCTGACTTGCACCCAAAATCGATACCAACTGAACCAA  
Q: GTTGATGATTTCTCCATCCGTAATTGATAATGCTGCTTTACAACCTAAGTCAATACCAATTGCACCAA-

S: ATCTG-----TTTGTCTCGTTGCCGCCTGTAATTCAGTTATATTAACGGTTAT  
Q: --CTGGTAGAACTTTAGGCTTTAATGCTTGGTCTAGC-----ACATCAACAGTAAAT

S: ACTGGCATAACATTTTCTATTGCGATAAACAATAGTGCAGGTCGTTGGAGTTCGCCAGATACGGGCTTTG  
Q: AGATGCGTACCATTTACTATTGCGATAAACGATAGTGAAGTAGTTGATTTACCCCAACCCAAAGCCTGC

S: CCGCGCATCTGGATTGAGCCAATCTTAGCTAACTCTAGATAAACCGTTATCACCCTGTGTATGTACCTTC  
Q: CCCCGCATCTGAATACGTCCAATTTAGACAGATTGAGATAATCCGTTTTCCCTTCAGATTCTACTTTAA

S: AGCCTGTTTTACTTGGATAAGTCCATCCAGAATAATGTTTAAATTGACTTATATTTGGGTCGCTTTGCTAA  
Q: AACCTGCACAGTCTGGATAAAGTCCATCCTGAATAATGTCTAATTGACTTAAATCTCGGACGCTTACTAG

S: ACCCTTAAACCAACGATTAATGCGTAATCGACACGCTTTAAAGTGGCTTGTAGAGTCATGGAATTGCAT  
Q: CCCTTTAAACCAACGCTCAAATGCAAAATCAACACGTTTTAATGTTGCTTGCAG-----TGCAT

S: -----TCTTTGTACTCTGTCCAAACTTCTTTAAAAGCCGTAAGAGTTATTAACCTCAACGAG  
Q: GGCTGGGAAGTTCTTTGTACTCTACCCAAACATCTTTAAAATGCTGGCAACAATT-----

S: **ACTGTCAACAGTCCCGCTGTTCTCAAACCGTGCCTGAAAGTTTCTCTCACACGGCTCCTCAACGATA**  
Q: -----

S: **AGGTGCAAGTCATGCATACCTCATTACCCATTTGTCTCGACTCTTTCGAGCCTTTTGGTGAGCTTAGGC**  
Q: -----

S: **TTGGCACTGTACAGCCAGATTGATTGCCGAGACTGCCATCTGTGACGGTCTTTGTGTATGGCAATGTC**  
Q: -----

S: **TATGTAGAAGCTGCCAATTATCGTAGAAATCCTTTCCACCTTGCAGCTTAGGGATTCTGTGGTCAACTTC**  
Q: -----

S: **CATCACATCGTTTTTCACGAAAATTAATCCGAGTACATTTCCCTTTTGTCTTCTCAACAATGTT**  
Q: -----

S: **GCCAGTGTCTTAGGCATTTTCAGGGTTGTTACCCATTCTTGAACCTCAATAAACCAAGTTCGGTGTATG**  
Q: -----

S: **GGGACGATTCGCCCTTAACCTTTACATAGCGCTTAATTGGTGTTCGCTATGTTTAGTAACCGCTAGG**  
Q: -----

S: **GTTATTACCTTTTTGCCTGGTTGCGAATACCCAGTTGTCGCGCTCTATGGATTGCCAATACTTCTTTGAC**  
Q: -----

S: **ACCCATCCCCGGATTTTTTGGGGTGTCCGCGCTTTCGCCAAGCTCTGAGCTTCTGGTACATGAGGTAAT**  
Q: -----

S: **CTTGGTACAGTAAGCCACCTTACTTACTTGTGTGCGTAGTAGTTAGCCATCCCCGAATAATCGGGT**  
Q: -----

S: **CAGTTTCTTAATTAGCGCCACTTGTGGTGCATTCTGTGGCGTTGATAACTTCGCAATCTGTTCTGTAG**  
Q: -----

Q: -----  
S: TGTACCTTCTGCTTATCCTTGCTTGGGGTGATGATTGGTTTTATTCCCTAGCGCTCTTCCATATTTGTCTT  
-----  
Q: -----  
S: TTCCAGAGTGGTATTTACCCACTTTGTATTGACGTATATTGAAGCCAAGGAAATCAAATCCTGGCTGTTT  
-----  
Q: -----  
S: TTGTTACATACGGGTGAGGGTGTGAGCAAGTCTTGTTTTGCTAGGTTTTAGTTCCAAACCCATGTCTTTC  
-----  
Q: -----  
S: AACCATTCCTGGATTATATCCTTGCCACTTTGGACGATGGTTAAGTCTTCGTGGAGAATCACGAAGTCGT  
-----  
Q: -----  
S: CGGCATATCTGATCACGGATGGAGGATAGAATGTCTTCTTTACCCATTTTCAGAGTATCCCCGTTTGG  
-----  
Q: -----  
S: GAATACCCTTTTGATTAGATTTTCCATCCCGTGGAGGGCAATGTTTGCTAGTAACGGAGAAATGACCCCG  
-----  
Q: -----  
S: CCCTGTGGCGTTCCTCAGTTGTTGGAAACAACCTGCTTTGCGTCCATCACTCCCCCTTTTAACCATGCTC  
-----  
Q: -----  
S: GGATTTGACGGCGTATGGTAGGAATGTATTTAATTTTCTTAGCAGTGCTTTATGGTCGATTTGGTCAA  
-----  
Q: -----  
S: GCATTTAGCAATATCGGCATCAAGGACATATTTGCCCTTAAACCTAATTGTGTCATATATAGCCTGAACC  
-----  
Q: -----  
S: GCATCGTGACATGAGCGTCCGGGTCTGAAACCGTATGAGTTGGCTTCAAATCGCGCTTCCCATTTCTGGCT  
-----  
Q: -----  
S: CTAGTGCCAGTTTGACAAGTGCTTGCAAAGCTCGGTCTTTCATTGTGGGATGCCTAAAGGTCTTTTCTC  
-----  
Q: -----  
S: CTCCTTTCCGGGTTTGGGAATCCATACTCGCTGGTTGGAGCGACCTTTGAACATAGTTTTAGATTTTCA  
-----  
Q: -----  
S: ACCAAGATGAGACGTTGCTTTGGGGTCAAGTACTTAACACCATCCACACCTGCCGTCTTCTTACCTTGAT  
-----  
Q: -----  
S: TGTCTTGGGTAACCCGGCGAACCGAGAGACATTTTGCTGCCCAGGACTTCATCAGCATCTTTGGAGTCT  
-----  
Q: -----  
S: GCGAGTCATTTTCACATCGCCACGCTGAGAGGCTCGATAGATTCTTCTTGCAACTGTAGACTTTACGC  
-----  
Q: -----  
S: TCTAGTTTTTGCCAGGGTATTGCCTTCCATTCCATCGTAGTCTTTAAACTCGCTTTAGACATTTGTATTG  
-----  
Q: -----  
S: CTACTTAAGACTCTATCTTTCTTATCATCGTGAGTCTGTTGGCGTATCCCTCTTATTAGTAGAGAGCGT  
-----  
Q: -----  
S: TAGCTTCTGACTCAATCTTTCTCCATTGCTTGGCGTTGGCACCTACTCAGGCATCGACCTGACTGAGA  
-----  
Q: -----  
S: GCATAAGGGAGGTTATCTCGTTCCTGATAGCCATTGTTTGAACCTTTAGGATGGTACTATCCACCGGGTT





**Fig. S9E)**

IS605-1\_CC 1176 64  
IS605-1\_NS\_TnpB 51 421  
Identity = 0.6900

S: 1176 NSLPAFKEVWTEYKECNSMTLQATLKRVDYAFNRWFKGLAKRPKYKSIKHYSWGTYPSTKTGWKVHTTGDN 967  
N LPAFK+VW EYKE S LQATLKRVD+AF RWFKGL:KRP++KSI+HYSWGTYP G+KV + G+N  
Q: 51 NCLPAFKDVWVEYKELPSHALQATLKRVDFAFERWFKGLGKRPRFKSIRHYSWGTYPDCAGFKVESEGEN 120

S: 966 GYLELAKIGSIQMRGKARIWGTPTTCTIVYRNRKWKYASITVNITELQAATRQTDGFSVGDGCKSALAI 757  
GYL L+KIG IQMRG+A WG TTCTIVYRN KWYASITV++ + + G++GID GCK+AL+I  
Q: 121 GYLNLKIGRIQMRGQALGWGKSTTCTIVYRNSKWKYASITVDVLDQALKPKVLPVGAIGIDLGCKAALSI 190

S: 756 TDGENHSFIEAPKFLRKAEEKIRLSKGRKRPPNRKQKASNRWKKTAQAKISKVTRKVNQRQNWVH 547  
TDGENH I+APKFLR AE KIK+ SK KRRKR PNR KK KAS R+KK Q+K++K+ RKV:NQRQNWVH  
Q: 191 TDGENHQIDAPKFLRNAEQIKKASKKRRRAPNRNKKIKASRRYKKAQSKVTKLVRKVGNRQNWVH 260

S: 546 QVATDIVSCNSFVATEKLEVSKMTRSSKKGKRKKQKAGLNKSILDVGMGLRSAIEYKVKNAGGVFVEVP 337  
QVA +IVS NSFVATEKLEV MT +KKGKRKKQKAGLNKSILDV: GMLR+ I+YKV+ GGVFVEVP  
Q: 261 QVAEIVSGNSFVATEKLEVNMTSKAKKGRKKQKAGLNKSILDVAFGMLRNTIKYKVEQIGGVFVEVP 330

S: 336 TRKVKPSQTCPKCGNQAOKTLDERVVHHCHECGLEMDRDLAALVMLLWALGILPGFGTSLADADVSSSTS 127  
T+KVKPSQTCPKCG+Q KKTLD RVH+C CG DRD+AAA VML W+ G LPG GTSL A+ SS +  
Q: 331 TKKVKPSQTCPKCGHQHKTLDIRVHNCVVCGYVQDRDIAAAEVMLYWSKGTLPGLGTSLVVAESPSPT 400

S: 126 ETCKRKQTGSMKQLGQVKRQK 64  
T KRKQ+GSM+QLG KRQK  
Q: 401 STGKRKQSGSMRQLGAKKRQK 421

IS605-1\_CC 3837 3688  
IS605-1\_NS\_TnpB 1 50  
Identity = 0.7400

S: 3837 VNFRLYPNKKQKQTLRYHRKLHKDLYNAAVNCNRFQYQKFNHSDVDYFEQQ 3688  
+ FRLYPN+K + LRYHRKLHKDLYNAAV NRF QY+ +NH VDYFEQQ  
Q: 1 MTFRLYPNEKTELILRYHRKLHKDLYNAAVNNRFNRYKIYNHKVDYFEQQ 50
